# Supplementary material
Source: publisher figshare collection journal article supplement (https://acs.figshare.com/ndownloader/files/14925227)

## Supporting Information:

# C1-Galactopyranosyl heterocycle structure guides selectivity: Triazoles prefer galectin-1 and oxazoles prefer galectin-3

Alexander Dahlqvist<sup>1</sup>, Hakon Leffler<sup>2</sup>, Ulf J. Nilsson<sup>1\*</sup>

<sup>1</sup>Centre for Analysis and Synthesis, Department of Chemistry, Lund University. POB 124, 221 00, Lund, Sweden

<sup>2</sup>Section of Microbiology, Immunology and Glycobiology, Lund University. Sölvegatan 19 223 62 Lund, Sweden

\*Corresponding author: ulf.nilsson@chem.lu.se

## Table of contents

|                                                                                                                                                          |    |
|----------------------------------------------------------------------------------------------------------------------------------------------------------|----|
| Synthetic procedures and physical data for compounds <b>1b-1j</b> , <b>2b-2i</b> , <b>3b-3c</b> , <b>4b-4c</b> , <b>9b-9c</b> , and <b>10b-10i</b> ..... | 4  |
| NMR spectra.....                                                                                                                                         | 21 |

Synthetic procedures and physical data for compounds **1b-1j**, **2b-2i**, **3b-3c**, **4b-4c**, **9b-9c**, and **10b-10i**

**1-Naphth-1-yl-4-(1-deoxy- $\beta$ -D-galactopyranosyl)-1H-1,2,3-triazole 1b**

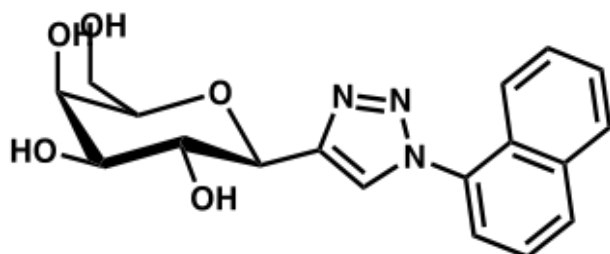

Compound **8** (100 mg, 0.280 mmol), copper(I) iodide (10 mg, 0.047 mmol) and 1-naphthyl azide (52 mg, 0.308 mmol) were dissolved in dry acetonitrile (3 mL), triethylamine (51  $\mu$ L, 0.714 mmol) was added, and the reaction left overnight. The reaction was poured into ethyl acetate (30 mL) and washed with brine (30 mL). The brine was extracted twice with ethyl acetate (30 mL), the organic phases pooled, dried with anhydrous sodium sulfate and evaporated. The crude was dissolved in dry methanol (2 mL) with sodium methoxide (85 mg, 1.57 mmol) and left for 3 hours. The reaction was quenched by Amberlite IR-120 ( $H^+$ ) addition to pH 7, filtered and evaporated. The crude was purified by column chromatography (5:1 dichloromethane/methanol) to give **1b** (64 mg, 66%). A portion of 10 mg, **1b** was purified with prep-HPLC (20 min gradient from 10% acetonitrile/90% water with 0.1% formic acid to 100% acetonitrile) prior to galectin binding evaluations.

$^1H$  NMR (400 MHz,  $CD_3OD$ ):  $\delta$  8.42 (s, 1H, triazole CH), 8.18-8.12 (m, 1H), 8.07 (d,  $J=8.0$  Hz, 1H), 7.71-7.56 (m, 5H), 4.55 (d,  $J=9.9$  Hz,  $H^1$ ), 4.10-3.99 (m, 2H), 3.87-3.73 (m, 3H) 3.69 (dd,  $J=9.7$  Hz, 3.2 Hz, 1H,  $H^3$ )

$^{13}C$  NMR (100 MHz,  $CD_3OD$ ):  $\delta$  167.24, 146.56, 134.27, 133.52, 130.36, 128.44, 128.05, 127.61, 126.87, 126.06, 124.85, 123.51, 121.80, 79.71, 74.97, 74.88, 70.90, 69.62, 61.55

HRMS:  $M+H$ ; 358.1403 found, 358.1403 calculated.

$[\alpha]^{20}_D=16^\circ$  ( $c=0.70066$  in methanol).

Purity by HPLC (UV/VIS detector 254 nm): 99.6%

**1-naphth-2-yl-4-(1-deoxy- $\beta$ -D-galactopyranosyl)-1H-1,2,3-triazole 1c**

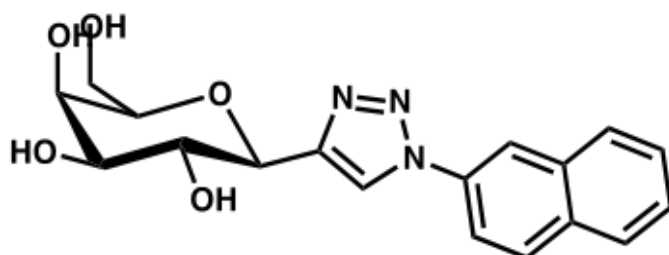

Compound **8** (48 mg, 0.134 mmol), copper(I) iodide (5 mg, 0.026 mmol) and 2-naphthyl azide (25 mg, 0.147 mmol) were dissolved in dry acetonitrile (3 mL), triethylamine (25  $\mu$ L, 0.350 mmol) was added, and the reaction left overnight. The

reaction was poured into ethyl acetate (30 mL) and washed with brine (30 mL). The brine was extracted twice with ethyl acetate (30 mL), the organic phases pooled, dried with anhydrous sodium sulfate and evaporated. The crude was dissolved in dry methanol (5 mL) with sodium methoxide (85 mg, 1.57 mmol) and left for 3 hours. The reaction was quenched by Amberlite IR-120 (H<sup>+</sup>) addition to pH 7, filtered and evaporated. The crude was purified by column chromatography (5:1 dichloromethane/methanol) and prep-HPLC (20 min gradient from 10% acetonitrile/90% water with 0.1% formic acid to 100% acetonitrile) to give **1c** (16 mg, 33%).

<sup>1</sup>H NMR (400 MHz, CD<sub>3</sub>OD):  $\delta$  8.72 (s, 1H, triazole CH), 8.36 (d,  $J$ =1.8 Hz, 1H), 8.12 (d,  $J$ =9.0 Hz, 1H), 8.05-7.98 (m, 3H), 7.65-7.60 (m, 2H), 4.50 (d,  $J$ =9.9 Hz, **H**<sup>1</sup>), 4.06-3.98 (m, 2H), 3.83 (dd,  $J$ =12.3, 8.7 Hz, 1H, **H**<sup>6</sup>) 3.78-3.73 (m, 2H) 3.67 (dd,  $J$ =9.3 Hz, 3.4 Hz, 1H, **H**<sup>3</sup>)

<sup>13</sup>C NMR (100 MHz, CD<sub>3</sub>OD):  $\delta$  129.76, 128.02, 127.61, 127.18, 126.81, 121.69, 118.43, 118.11, 79.68, 75.00, 74.86, 70.89, 69.58, 61.52

HRMS: M+H; 358.1412 found 358.1403 calculated.

$[\alpha]^{20}_{\text{D}}=14^{\circ}$  ( $c=0.59177$  in methanol).

Purity by HPLC (UV/VIS detector 254 nm): 99.2%

#### 1-(4-Chlorophenyl)-4-(1-deoxy- $\beta$ -D-galactopyranosyl)-1H-1,2,3-triazole **1d**

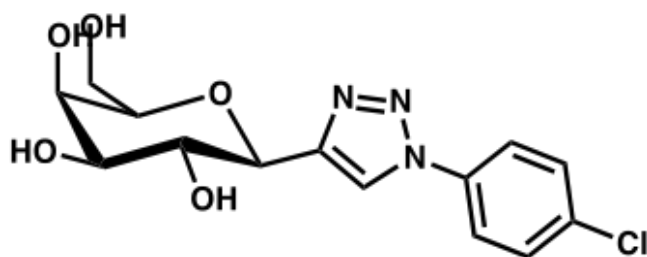

Compound **8** (25 mg, 0.070 mmol) was dissolved in dry acetonitrile (2 mL) with copper(I) iodide (3 mg, 0.014 mmol). 4-Chlorophenyl azide (0.15 mL, 0.074 mmol, 0.5 M in tert-butyl methyl ether) and triethylamine (10  $\mu$ L, 0.140 mmol) were added. The reaction was left overnight at room temperature, then poured into ethyl acetate (20 mL) and washed with brine (20 mL). The brine was extracted twice with ethyl acetate (20 mL), the organic phases pooled, dried with anhydrous sodium sulfate and evaporated. The crude was dissolved in dry methanol (2 mL) with sodium methoxide (23 mg, 0.420 mmol) and left for 3 hours. The reaction was quenched with Amberlite IR-120 (H<sup>+</sup>) until pH 7, filtered and evaporated. The crude was purified with prep-HPLC (20 min gradient from 10% acetonitrile/90% water with 0.1% formic acid to 100% acetonitrile) to give **1d** (7 mg, 30%).

<sup>1</sup>H NMR (400 MHz, CD<sub>3</sub>OD):  $\delta$  8.58 (s, 1H, triazole CH), 7.91-7.86 (m, 2H), 7.65-7.60 (m, 2H), 4.45 (d,  $J$ =9.7 Hz, **H**<sup>1</sup>), 4.02-3.95 (m, 2H), 3.81 (dd,  $J$ <sub>1</sub>=11.7 Hz,  $J$ <sub>2</sub>=8.2, 1H, **H**<sup>6</sup>), 3.76-3.71 (m, 2H), 3.65 (dd,  $J$ <sub>1</sub>=9.6 Hz,  $J$ <sub>2</sub>=2.9 Hz, 1H, **H**<sup>3</sup>)

<sup>13</sup>C NMR (100 MHz, CD<sub>3</sub>OD):  $\delta$  135.73, 134.26, 129.66, 121.62, 121.54, 79.66 (C5), 74.92 (C1), 74.82 (C3), 70.85 (C2), 69.54 (C4), 61.49 (C6)

HRMS: M+H; 342.0857 found, 342.0857 calculated.

$[\alpha]^{20}_{\text{D}}=25^{\circ}$  ( $c=0.22288$  in methanol).

Purity by HPLC (UV/VIS detector 254 nm): 99.8%

### 1-(3-Chlorophenyl)-4-(1-deoxy- $\beta$ -D-galactopyranosyl)-1H-1,2,3-triazole **1e**

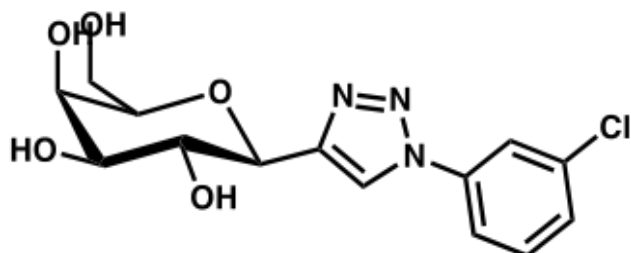

Compound **8** (25 mg, 0.070 mmol) was dissolved in dry acetonitrile (2 mL) with copper(I) iodide (3 mg, 0.014 mmol). 3-Chlorophenyl azide (0.15 mL, 0.074 mmol, 0.5 M in tert-butyl methyl ether) and triethylamine (10  $\mu$ L, 0.140 mmol) were added. The reaction was left overnight at room temperature, then poured into ethyl acetate (20 mL) and washed with brine (20 mL). The brine was extracted twice with ethyl acetate (20 mL), the organic phases pooled, dried with anhydrous sodium sulfate and evaporated. The crude was dissolved in dry methanol (2 mL) with sodium methoxide (23 mg, 0.420 mmol) and left for 3 hours. The reaction was quenched with Amberlite IR-120 ( $H^+$ ) until pH 7, filtered and evaporated. The crude was purified with prep-HPLC (20 min gradient from 10% acetonitrile/90% water with 0.1% formic acid to 100% acetonitrile) to give **1e** (24 mg, 99%).

$^1H$  NMR (400 MHz,  $CD_3OD$ ):  $\delta$  8.63 (s, 1H, triazole CH), 7.97 (t,  $J=2.0$  Hz, 1H), 7.83 (dq,  $J=4.1$  Hz, 1.0 Hz, 1H), 7.57 (t,  $J=8$  Hz, 1H), 7.53 (dq,  $J=4$  Hz, 1H, 1H), 4.46 (d,  $J=9.7$  Hz,  $H^1$ ), 4.03-3.95 (m, 2H), 3.81 (dd,  $J=11.7$  Hz, 8.2 Hz, 1H,  $H^6$ ), 3.77-3.71 (m, 2H), 3.66 (dd,  $J=9.07$  Hz, 2.9 Hz, 1H,  $H^3$ )

$^{13}C$  NMR (100 MHz,  $CD_3OD$ ):  $\delta$  135.73, 134.26, 129.66, 121.62, 121.54, 79.66, 74.92, 74.82, 70.85, 69.54, 61.49

HRMS:  $M+H$ ; 342.0857 found, 342.0857 calculated.

$[\alpha]^{20}_D = 15^\circ$  ( $c=0.55322$  in methanol).

Purity by HPLC (UV/VIS detector 254 nm): 95.1%

### 1-(4-Methylphenyl)-4-(1-deoxy- $\beta$ -D-galactopyranosyl)-1H-1,2,3-triazole **1f**

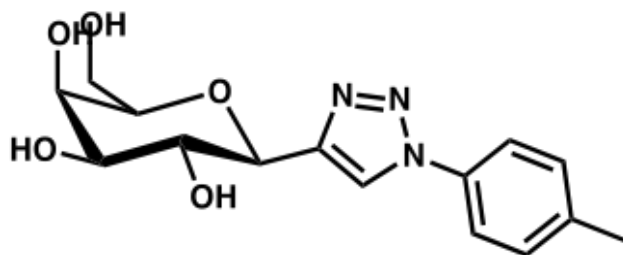

Compound **8** (25 mg, 0.070 mmol) was dissolved in dry acetonitrile (2 mL) with copper(I) iodide (3 mg, 0.014 mmol). 4-Methylphenyl azide (0.15 mL, 0.074 mmol, 0.5 M in tert-butyl methyl ether) and triethylamine (10  $\mu$ L, 0.140 mmol) were added. The reaction was left overnight at room temperature, then poured into ethyl acetate (20 mL) and washed with brine (20 mL). The brine was extracted twice with ethyl acetate (20 mL), the organic phases pooled, dried with anhydrous sodium sulfate and evaporated. The crude was dissolved in dry methanol (2 mL) with sodium methoxide (23 mg, 0.420 mmol) and left for 3 hours. The reaction was quenched with Amberlite IR-120 ( $H^+$ ) until pH 7, filtered

and evaporated. The crude was purified with prep-HPLC (20 min gradient from 10% acetonitrile/90% water with 0.1% formic acid to 100% acetonitrile) to give **1f** (4 mg, 16%).

$^1\text{H}$  NMR (400 MHz,  $\text{CD}_3\text{OD}$ ):  $\delta$  8.51 (s, 1H, triazole CH), 7.75-7.70 (m, 2H), 7.44-7.39 (m, 2H), 4.45 (d,  $J=9.9$  Hz, **H**<sup>1</sup>), 4.02-3.95 (m, 2H), 3.81 (dd,  $J=11.7$  Hz, 8.2 Hz, 1H, **H**<sup>6</sup>), 3.76-3.71 (m, 2H), 3.65 (dd,  $J=9.1$  Hz, 2.9 Hz, 1H, **H**<sup>3</sup>), 2.45 (s, 3H, phenyl methyl  $\text{H}_3$ )

$^{13}\text{C}$  NMR (100 MHz,  $\text{CD}_3\text{OD}$ ):  $\delta$  147.05, 139.14, 134.74, 129.99, 121.51, 120.12, 79.63, 74.94, 74.83, 70.86, 69.56, 61.49, 19.67

HRMS:  $\text{M}+\text{H}$ ; 322.1399 found, 322.1403 calculated.

$[\alpha]^{20}_{\text{D}} = 16^\circ$  ( $c=0.12387$  in methanol).

Purity by HPLC (UV/VIS detector 254 nm): 96.6%

### 1-(3-Methylphenyl)-4-(1-deoxy- $\beta$ -D-galactopyranosyl)-1H-1,2,3-triazole **1g**

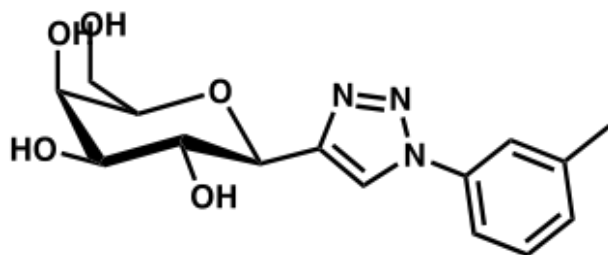

Compound **8** (25 mg, 0.070 mmol) was dissolved in dry acetonitrile (2 mL) with copper(I) iodide (3 mg, 0.014 mmol). 3-Methylphenyl azide (0.15 mL, 0.074 mmol, 0.5 M in tert-butyl methyl ether) and triethylamine (10  $\mu\text{L}$ , 0.140 mmol) were added. The reaction was left overnight at room temperature, then poured into ethyl acetate (20 mL) and washed with brine (20 mL). The brine was extracted twice with ethyl acetate (20 mL), the organic phases pooled, dried with anhydrous sodium sulfate and evaporated. The crude was dissolved in dry methanol (2 mL) with sodium methoxide (23 mg, 0.420 mmol) and left for 3 hours. The reaction was quenched with Amberlite IR-120 ( $\text{H}^+$ ) until pH 7, filtered and evaporated. The crude was purified with prep-HPLC (20 min gradient from 10% acetonitrile/90% water with 0.1% formic acid to 100% acetonitrile) to give **1g** (4 mg, 19%).

$^1\text{H}$  NMR (400 MHz,  $\text{CD}_3\text{OD}$ ):  $\delta$  8.54 (s, 1H, triazole CH), 7.72-7.69 (m, 1H), 7.67-7.63 (m, 1H), 7.48 (t,  $J=7.8$  Hz, 1H), 7.37-7.33 (m, 1H), 4.46 (d,  $J=9.7$  Hz, **H**<sup>1</sup>), 4.02-3.95 (m, 2H), 3.81 (dd,  $J=12.2$  Hz, 8.2 Hz, 1H, **H**<sup>6</sup>), 3.76-3.71 (m, 2H), 3.65 (dd,  $J=9.1$  Hz, 3.1 Hz, 1H, **H**<sup>3</sup>), 2.48 (s, 3H, phenyl methyl  $\text{H}_3$ )

$^{13}\text{C}$  NMR (100 MHz,  $\text{CD}_3\text{OD}$ ):  $\delta$  137.19, 129.39, 121.55, 120.67, 117.28, 79.65, 74.94, 74.83, 70.85, 69.56, 61.49, 19.98

HRMS:  $\text{M}+\text{H}$ ; 322.1402 found, 322.1403 calculated.

$[\alpha]^{20}_{\text{D}} = 13^\circ$  ( $c=0.16830$  in methanol).

Purity by HPLC (UV/VIS detector 254 nm): 99.6%

### 1-(4-Fluorophenyl)-4-(1-deoxy- $\beta$ -D-galactopyranosyl)-1H-1,2,3-triazole 1h

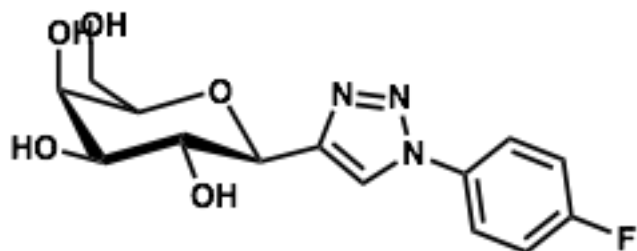

Compound **8** (25 mg, 0.070 mmol), was dissolved in dry acetonitrile (2 mL) with copper(I) iodide (3 mg, 0.014 mmol). 4-Fluorophenyl azide (0.15 mL, 0.074 mmol, 0.5M in tert-butyl methyl ether) and triethylamine (10  $\mu$ L 0.140 mmol) were added. The reaction was left overnight at room temperature, then poured into ethyl acetate (20 mL) and washed with brine (20 mL). The brine was extracted twice with ethyl acetate (20 mL), the organic phases pooled, dried with anhydrous sodium sulfate and evaporated. The crude was dissolved in dry methanol (2 mL) with sodium methoxide (23 mg, 0.420 mmol) and left for 3 hours. The reaction was quenched with Amberlite IR-120 ( $H^+$ ) until pH 7, filtered and evaporated. The crude was purified with prep-HPLC (20 min gradient from 10% acetonitrile/90% water with 0.1% formic acid to 100% acetonitrile) to give **1h** (11 mg, 44%).

$^1H$  NMR (400 MHz,  $CD_3OD$ ):  $\delta$  8.54 (s, 1H, triazole CH), 7.89-7.86 (m, 2H), 7.40-7.32 (m, 2H), 4.46 (d,  $J=9.7$  Hz,  $H^1$ ), 4.01-3.95 (m, 2H), 3.81 (dd,  $J=11.7$  Hz, 8.2 Hz, 1H,  $H^6$ ), 3.76-3.71 (m, 2H), 3.65 (dd,  $J=9.7$  Hz, 2.9 Hz, 1H,  $H^3$ )

$^{13}C$  NMR (100 MHz,  $CD_3OD$ ):  $\delta$  163.81, 161.35, 147.28, 133.45, 122.49, 122.41, 121.76, 116.43, 116.19, 79.65, 74.93, 74.82, 70.85, 69.55, 61.57

HRMS:  $M+Na$ ; 348.0972 found, 348.0972 calculated.

$[\alpha]^{20}_D=22^\circ$  ( $c=0.33000$  in methanol).

Purity by HPLC (UV/VIS detector 254 nm): 99.9%

### 1-(3-Fluorophenyl)-4-(1-deoxy- $\beta$ -D-galactopyranosyl)-1H-1,2,3-triazole 1i

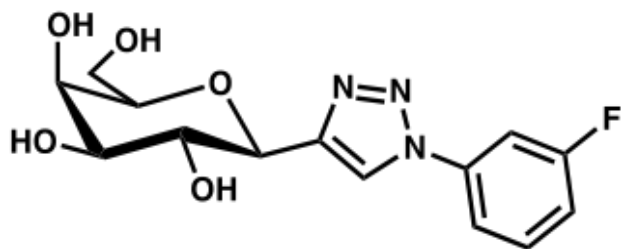

Compound **8** (25 mg, 0.070 mmol) was dissolved in dry acetonitrile (2 mL) with copper(I) iodide (3 mg, 0.014 mmol). 3-Fluorophenyl azide (0.15 mL, 0.074 mmol, 0.5 M in tert-butyl methyl ether) and triethylamine (10  $\mu$ L, 0.140 mmol) were added. The reaction was left overnight at room temperature, then poured into ethyl acetate (20 mL) and washed with brine (20 mL). The brine was extracted twice with ethyl acetate (20 mL), the organic phases pooled, dried with anhydrous sodium sulfate and evaporated. The crude was dissolved in dry methanol (2 mL) with sodium methoxide (23 mg, 0.420 mmol) and left for 3

hours. The reaction was quenched with Amberlite IR-120 (H<sup>+</sup>) until pH 7, filtered and evaporated. The crude was purified with prep-HPLC (20 min gradient from 10% acetonitrile/90% water with 0.1% formic acid to 100% acetonitrile) to give **1i** (14.7 mg, 64%) as a lemon-yellow solid.

<sup>1</sup>H NMR (400 MHz, CD<sub>3</sub>OD): δ 8.62 (s, 1H, triazole CH), 7.76-7.70 (m, 2H), 7.67-7.59 (m, 1H), (tdd, *J* = 8.4 Hz, 2.5 Hz, 0.9 Hz, 1H), 4.46 (d, *J* = 10.0 Hz, H<sup>1</sup>), 4.02-3.94 (m, 2H), 3.81 (dd, *J* = 12.1 Hz, 8.4 Hz, H<sup>6</sup>), 3.77-3.70 (m, 2H), 3.64 (dd, *J* = 9.5 Hz, 3.3 Hz, H<sup>3</sup>)

<sup>13</sup>C NMR (100 MHz, CD<sub>3</sub>OD): δ 131.42, 131.33, 121.62, 115.71, 115.38, 115.16, 107.7, 107.44, 79.67, 74.91, 74.82, 70.84, 69.55, 61.49

HRMS: M+H; 326.1155 found, 326.1152 calculated.

[α]<sub>D</sub><sup>20</sup> = 24° (*c* = 0.35414 in methanol.)

Purity by HPLC (UV/VIS detector 254 nm): 99.7%

### 1-(2-Fluorophenyl)-4-(1-deoxy-β-D-galactopyranosyl)-1H-1,2,3-triazole **1j**

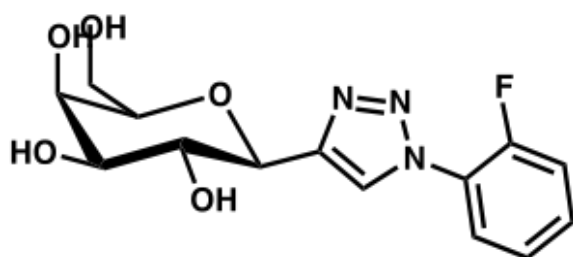

Compound **8** (25 mg, 0.070 mmol) was dissolved in dry acetonitrile (2 mL) with copper(I) iodide (3 mg, 0.014 mmol). Phenyl azide (0.15 mL, 0.074 mmol, 0.5 M in tert-butyl methyl ether) and triethylamine (10 μL, 0.140 mmol) were added. The reaction was left overnight at room temperature, then poured into ethyl acetate (20 mL) and washed with brine (20 mL). The brine was extracted twice with ethyl acetate (20 mL), the organic phases pooled, dried with anhydrous sodium sulfate and evaporated. The crude was dissolved in dry methanol (2 mL) with sodium methoxide (23 mg, 0.420 mmol) and left for 3 hours. The reaction was quenched with Amberlite IR-120 (H<sup>+</sup>) until pH 7, filtered and evaporated. The crude was purified with prep-HPLC (20 min gradient from 10% acetonitrile/90% water with 0.1% formic acid to 100% acetonitrile) to give **1j** (4.5 mg, 20%).

<sup>1</sup>H NMR (400 MHz, CD<sub>3</sub>OD): δ 8.46 (d, *J* = 2.3 Hz, 1H, triazole CH), 7.91-7.85 (m, 1H), 7.63-7.57 (m, 1H), 7.53-7.41 (m, 2H), 4.48 (d, *J* = 9.8 Hz, H<sup>1</sup>), 4.02-3.96 (m, 2H), 3.82 (dd, *J* = 13.0 Hz, 8.7 Hz, 1H, H<sup>6</sup>), 3.77-3.71 (m, 2H), 3.65 (dd, *J* = 9.6 Hz, 3.3 Hz, 1H, H<sup>3</sup>)

<sup>13</sup>C NMR (100 MHz, CD<sub>3</sub>OD): δ 130.94, 130.86, 125.26, 125.12, 124.71, 124.65, 116.88, 116.68, 79.69, 74.86, 74.83, 70.85, 69.58, 61.52

HRMS: M+H; 326.1149 found, 326.1152 calculated.

[α]<sub>D</sub><sup>20</sup> = 21° (*c* = 0.16455 in methanol).

Purity by HPLC (UV/VIS detector 254 nm): 99.3%

## 2-Naphth-1-yl-5-(1-deoxy- $\beta$ -D-galactopyranosyl)oxazole **2b**

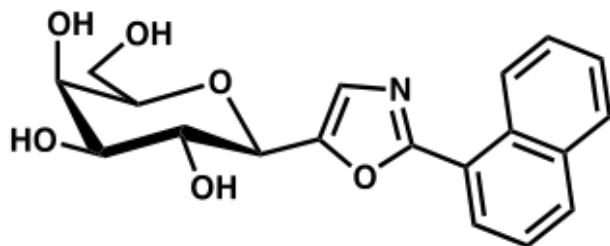

Compound **10b** (20 mg, 0.039 mmol) and of sodium methoxide (13 mg, 0.232 mmol) were dissolved in dry methanol (4mL) under nitrogen. After 3 hours, the reaction was quenched with Amberlite IR-120 (H<sup>+</sup>) to pH 7, filtered and evaporated. Prep-HPLC (20 min gradient from 10% acetonitrile/90% water with 0.1% formic acid to 100% acetonitrile) gave **2b** (7 mg, 52%).

<sup>1</sup>H NMR (400 MHz, CD<sub>3</sub>OD):  $\delta$  9.09-9.05 (m, 1H), 8.21 (dd,  $J$ =7.3 Hz, 1.1 Hz, 1H), 8.07 (d,  $J$ =8.4 Hz, 1H), 8.01-7.97 (m, 1H), 7.68-7.57 (m, 3H), 7.44 (s, 1H oxazole CH), 4.45 (d,  $J$ =9.9 Hz, 1H, **H**<sup>1</sup>), 4.14 (t,  $J$ =9.6 Hz 1H, **H**<sup>2</sup>), 4.00 (dd  $J$ =3.2 Hz, 0.6 Hz, 1H **H**<sup>4</sup>), 3.82 (dd,  $J$ =11.9 Hz, 8.42 Hz, 1H, **H**<sup>6</sup>) 3.78-3.72 (m, 2H), 3.65 (dd,  $J$ =9.3 Hz, 3.3 Hz, 1H, **H**<sup>3</sup>)

<sup>13</sup>C NMR (100 MHz, CD<sub>3</sub>OD):  $\delta$  150.09, 131.13, 128.29, 127.86, 127.14, 126.69, 126.081, 125.50, 124.68, 79.69, 74.89, 74.03, 69.43, 69.15, 61.43

HRMS: M+H; 358.1286 found, 358.1291 calculated.

$[\alpha]^{20}_{\text{D}}$  = 26° ( $c$ =0.33409 in methanol).

Purity by HPLC (UV/VIS detector 254 nm): 95.2%

## 2-Naphth-2-yl-5-(1-deoxy- $\beta$ -D-galactopyranosyl)oxazole **2c**

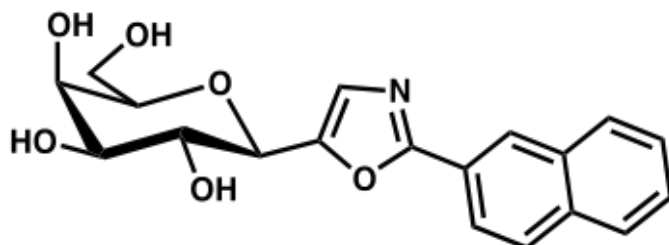

Compound **10c** (30 mg, 0.057 mmol) and sodium methoxide (19 mg, 0.343 mmol) were dissolved in dry methanol (4 mL) under nitrogen. After 3 hours, the reaction was quenched with Amberlite IR-120 (H<sup>+</sup>) to pH 7, filtered and evaporated. Prep-HPLC (20 min gradient from 10% acetonitrile/90% water with 0.1% formic acid to 100% acetonitrile) gave **2c** (6 mg, 29%).

<sup>1</sup>H NMR (400 MHz, CD<sub>3</sub>OD):  $\delta$  8.61 (s, 1H), 8.14 (dd,  $J$ =8.5 Hz, 1.7 Hz, 1H), 8.04-7.99 (m, 2H), 7.97-7.93 (m, 1H), 7.63-7.57 (m, 2H), 7.37 (s, 1H, oxazole CH), 4.43 (d,  $J$ =9.8 Hz, 1H, **H**<sup>1</sup>), 4.14 (t,  $J$ =9.4 Hz, 1H, **H**<sup>2</sup>), 4.02 (d,  $J$ =3.2 Hz, 1H, **H**<sup>6</sup>), 3.87-3.71 (m, 3H), 3.64 (dd,  $J$ =9.4 Hz, 3.2 Hz, 1H, **H**<sup>3</sup>)

<sup>13</sup>C NMR (100 MHz, CD<sub>3</sub>OD):  $\delta$  150.21, 134.37, 133.09, 128.50, 128.35, 127.54, 127.31, 126.81, 126.71, 126.15, 124.18, 122.65, 79.67, 74.84, 73.99, 69.41, 69.03, 61.42

HRMS: M+H; 358.1289 found, 358.1291 calculated.

$[\alpha]^{20}_{\text{D}}$  = 14° ( $c$ =0.22014 in methanol).

Purity by HPLC (UV/VIS detector 254 nm): 96.6%



### 2-(4-Chlorophenyl)-5-(1-deoxy- $\beta$ -D-galactopyranosyl)oxazole **2d**

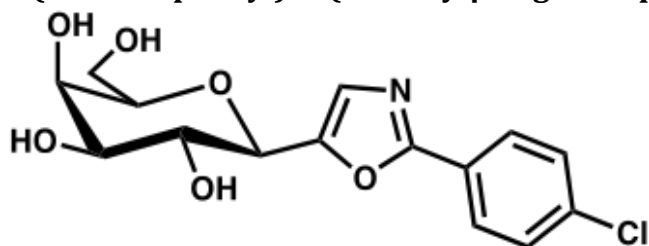

Compound **10d** (10 mg, 0.019 mmol) and of sodium methoxide (6 mg, 0.117 mmol) were dissolved in dry methanol (4 mL) under nitrogen. After 3 hours, the reaction was quenched with Amberlite IR-120 ( $H^+$ ) to pH 7, filtered and evaporated. Prep-HPLC (20 min gradient from 10% acetonitrile/90% water with 0.1% formic acid to 100% acetonitrile) gave **2d** (2 mg, 30%).

$^1H$  NMR (400 MHz,  $CD_3OD$ ):  $\delta$  8.08-8.03 (m, 2H), 7.58-7.52 (m, 2H), 7.31 (s, 1H, oxazole CH), 4.38 (d,  $J=9.5$  Hz, 1H, **H**<sup>1</sup>), 4.07 (t,  $J=9.9$  Hz 1H, **H**<sup>2</sup>), 3.99 (d  $J=3.1$  Hz, 1H **H**<sup>6</sup>), 3.82-3.68 (m, 3H), 3.61 (dd,  $J=9.4$  Hz, 3.4 Hz, 1H, **H**<sup>3</sup>)

$^{13}C$  NMR (100 MHz,  $CD_3OD$ ):  $\delta$  128.91, 127.51, 126.82, 79.64, 74.79, 73.90, 69.36, 69.01, 61.39

HRMS:  $M+H$ ; 342.0743 found, 342.0744 calculated.

$[\alpha]^{20}_D = 18^\circ$  ( $c=0.14658$  in methanol).

Purity by HPLC (UV/VIS detector 254 nm): 97.1%

### 2-(3-Chlorophenyl)-5-(1-deoxy- $\beta$ -D-galactopyranosyl)oxazole **2e**

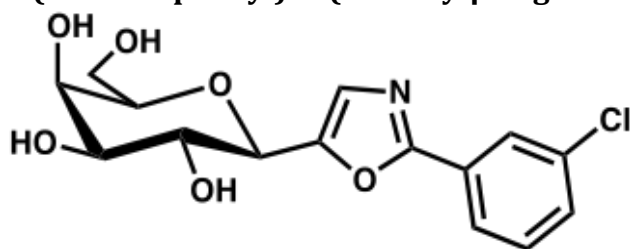

Compound **10e** (10 mg, 0.019 mmol) and sodium methoxide (6 mg, 0.117 mmol) were dissolved in dry methanol (4 mL) under nitrogen. After 3 hours, the reaction was quenched with Amberlite IR-120 ( $H^+$ ) to pH 7, filtered and evaporated. Prep-HPLC (20 min gradient from 10% acetonitrile/90% water with 0.1% formic acid to 100% acetonitrile) gave **2e** (2 mg, 30%).

$^1H$  NMR (400 MHz,  $CD_3OD$ ):  $\delta$  8.10-8.07 (m, 1H), 8.02-7.98 (m, 1H), 7.56-7.49 (m, 2H), 7.33 (s, 1H, oxazole CH), 4.39 (d,  $J=9.8$  Hz, 1H, **H**<sup>1</sup>), 4.08 (t,  $J=9.8$  Hz 1H, **H**<sup>2</sup>), 3.99 (d  $J=3.4$  Hz, 1H **H**<sup>6</sup>), 3.83-3.69 (m, 3H), 3.61 (dd,  $J=9.5$  Hz, 3.4 Hz, 1H, **H**<sup>3</sup>)

$^{13}C$  NMR (100 MHz,  $CD_3OD$ ):  $\delta$  150.56, 134.68, 130.33, 128.81, 126.94, 125.85, 124.26, 79.68, 74.79, 73.90, 69.40, 68.98, 61.41

HRMS:  $M+H$ ; 342.0744 found, 342.0744 calculated.

$[\alpha]^{20}_D = 12^\circ$  ( $c=0.09179$  in methanol).

Purity by HPLC (UV/VIS detector 254 nm): 99.5%

## 2-(4-Methylphenyl)-5-(1-deoxy- $\beta$ -D-galactopyranosyl)oxazole **2f**

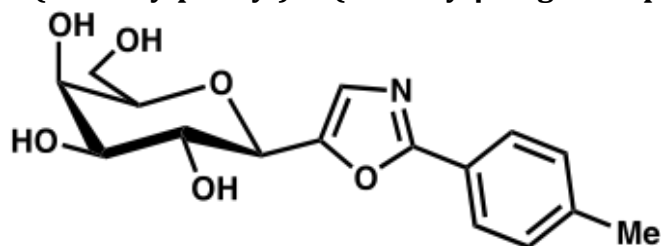

Compound **10f** (3.3 mg, 0.007 mmol) and sodium methoxide (2 mg, 0.040 mmol) were dissolved in dry methanol (2 mL) under nitrogen. After 3 hours, the reaction was quenched with Amberlite IR-120 ( $H^+$ ) to pH 7, filtered and evaporated. Prep-HPLC (20 min gradient from 10% acetonitrile/90% water with 0.1% formic acid to 100% acetonitrile) gave **2f** (1 mg, 46%).

$^1H$  NMR (400 MHz,  $CD_3OD$ ):  $\delta$  7.97-7.93 (m, 2H), 7.37-7.32 (m, 2H), 7.28 (s, 1H, oxazole CH), 4.37 (d,  $J=9.8$  Hz, 1H,  $H^1$ ), 4.08 (t,  $J=9.5$  Hz, 1H,  $H^2$ ), 3.99 (d,  $J=3.3$  Hz, 1H  $H^6$ ), 3.83-3.68 (m, 3H), 3.61 (dd,  $J=9.5$  Hz, 3.6 Hz, 1H,  $H^3$ ), 2.45 (s, 3H, phenyl methyl)

$^{13}C$  NMR (100 MHz,  $CD_3OD$ ):  $\delta$  129.26, 126.42, 126.03, 79.63, 74.85, 73.95, 69.40, 68.97, 61.41, 20.07

HRMS:  $M+H$ ; 322.1293 found, 322.1291 calculated.

$[\alpha]^{20}_D = 16^\circ$  ( $c=0.005289$  in methanol).

Purity by HPLC (UV/VIS detector 254 nm): 99.1%

## 2-(3-Methylphenyl)-5-(1-deoxy- $\beta$ -D-galactopyranosyl)oxazole **2g**

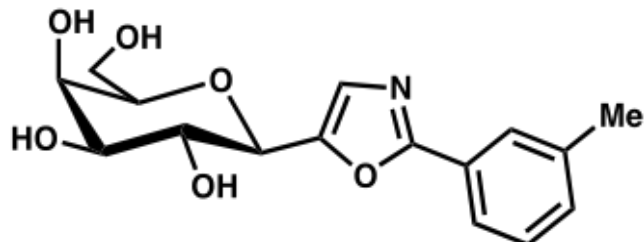

Compound **10g** (22 mg, 0.045 mmol) and sodium methoxide (15 mg, 0.270 mmol) were dissolved in dry methanol (4 mL) under nitrogen. After 3 hours, the reaction was quenched with Amberlite IR-120 ( $H^+$ ) to pH 7, filtered and evaporated. Prep-HPLC (20 min gradient from 10% acetonitrile/90% water with 0.1% formic acid to 100% acetonitrile) gave **2g** (7 mg, 46%).

$^1H$  NMR (400 MHz,  $CD_3OD$ ):  $\delta$  7.90 (s, 1H), 7.85 (d,  $J=7.7$  Hz, 1H), 7.40 (t,  $J=7.6$  Hz, 1H), 7.35 (d,  $J=7.7$  Hz, 1H), 4.38 (d,  $J=9.7$  Hz, 1H,  $H^1$ ), 4.09 (t,  $J=9.7$  Hz, 1H,  $H^2$ ), 3.99 (d,  $J=3.4$  Hz, 1H  $H^6$ ), 3.83-3.68 (m, 3H), 3.61 (dd,  $J=9.3$  Hz, 3.5 Hz, 1H,  $H^3$ ), 2.44 (s, 3H, phenyl methyl)

$^{13}C$  NMR (100 MHz,  $CD_3OD$ ):  $\delta$  149.94, 138.68, 131.23, 128.56, 126.84, 126.52, 126.50, 123.21, 79.64, 74.84, 73.95, 69.40, 68.98, 61.41, 19.95

HRMS:  $M+H$ ; 322.1288 found, 322.1291 calculated.

$[\alpha]^{20}_D = 17^\circ$  ( $c=0.21697$  in methanol).

Purity by HPLC (UV/VIS detector 254 nm): 99.5%

### 2-(4-Fluorophenyl)-5-(1-deoxy- $\beta$ -D-galactopyranosyl)oxazole **2h**

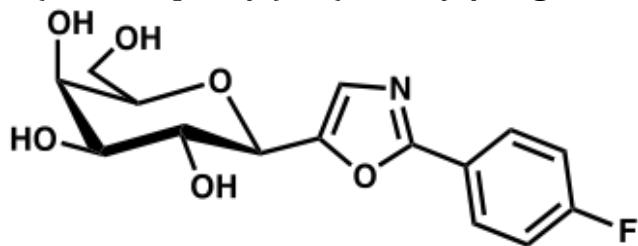

Compound **2h** (7 mg, 0.014 mmol) and sodium methoxide (5 mg, 0.085 mmol) were dissolved in dry methanol (2 mL) under nitrogen. After 3 hours, the reaction was quenched with Amberlite IR-120 ( $H^+$ ) to pH 7, filtered and evaporated. Prep-HPLC (20 min gradient from 10% acetonitrile/90% water with 0.1% formic acid to 100% acetonitrile) gave **2h** (2 mg, 43%).

$^1H$  NMR (400 MHz,  $CD_3OD$ ):  $\delta$  8.14-8.07 (m, 2H), 7.32-7.23 (m, 3H), 4.37 (d,  $J$ =10.0 Hz, 1H,  $H^1$ ), 4.08 (t,  $J$ =8.9 Hz, 1H,  $H^2$ ), 3.98 (d,  $J$ =3.3 Hz, 1H,  $H^6$ ), 3.83-3.68 (m, 3H), 3.61 (dd,  $J$ =9.4 Hz, 3.4 Hz, 1H,  $H^3$ )

$^{13}C$  NMR (100 MHz,  $CD_3OD$ ):  $\delta$  128.46, 128.38, 126.64, 115.79, 115.56, 79.63, 74.82, 73.91, 69.38, 68.98, 61.40

HRMS:  $M+H$ ; 326.1035 found, 326.1040 calculated.

$[\alpha]^{20}_D = 18^\circ$  ( $c$ =0.07776 in methanol).

Purity by HPLC (UV/VIS detector 254 nm): 96.6%

### 2-(3-Fluorophenyl)-5-(1-deoxy- $\beta$ -D-galactopyranosyl)oxazole **2i**

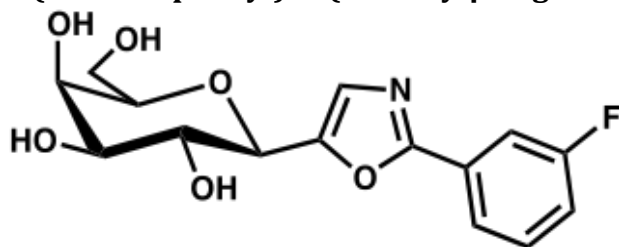

Compound **10i** (10 mg, 0.020 mmol) and sodium methoxide (7 mg, 0.122 mmol) were dissolved in dry methanol (2 mL) under nitrogen. After 3 hours, the reaction was quenched with Amberlite IR-120 ( $H^+$ ) to pH 7, filtered and evaporated. Prep-HPLC (20 min gradient from 10% acetonitrile/90% water with 0.1% formic acid to 100% acetonitrile) gave **2i** (1 mg, 18%).

$^1H$  NMR (400 MHz,  $CD_3OD$ ):  $\delta$  7.90 (ddd,  $J$ = 7.8 Hz, 1.7 Hz, 0.9 Hz, 1H), 7.79 (ddd,  $J$ = 9.8 Hz, 2.6 Hz, 1.5 Hz), 7.59-7.52 (m, 1H), 7.33 (s, 1H, oxazole CH), 7.28 (tdd,  $J$ = 8.5 Hz, 2.7 Hz, 0.8 Hz, 1H), 4.39 (d,  $J$ = 9.8 Hz, 1H,  $H^1$ ), 4.08 (t,  $J$ =8.4 Hz, 1H,  $H^2$ ), 3.99 (d,  $J$ =3.3 Hz, 1H,  $H^6$ ), 3.83-3.68 (m, 3H), 3.61 (dd,  $J$ =9.4 Hz, 3.3 Hz, 1H,  $H^3$ )

$^{13}C$  NMR (100 MHz,  $CD_3OD$ ):  $\delta$  130.79, 126.89, 121.92, 117.31, 79.67, 74.80, 73.90, 69.38, 69.01, 61.40

HRMS:  $M+H$ ; 326.1035 found, 326.1040 calculated.

$[\alpha]^{20}_D = 19^\circ$  ( $c$ =0.06491 in methanol).

Purity by HPLC (UV/VIS detector 254 nm): 99.2%

### 3-Naphth-1-yl-5-(1-deoxy- $\beta$ -D-galactopyranosyl)isoxazole **3b**

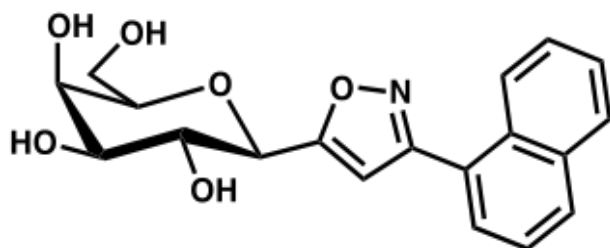

Compound **9b** (84 mg, 0.165 mmol) was dissolved in dry THF (3 mL) with hydroxylamine hydrochloride (29 mg, 0.411 mmol) and of sodium carbonate (71 mg, 0.666 mmol) and refluxed overnight under nitrogen. The reaction was poured into ethyl acetate (30 mL) and washed with brine. The brine was extracted two times with ethyl acetate (30mL), the organic phases were pooled, dried with anhydrous sodium sulfate and evaporated. The crude was dissolved in dry methanol (2 mL) with of sodium methoxide (39 mg, 0.708 mmol). After 3 hours, the reaction was quenched by addition of Amberlite IR-120 (H<sup>+</sup>) until pH 7, filtered & evaporated. The crude was purified first with column chromatography (5:1 dichloromethane/methanol) and then with prep-HPLC to give **3b** (11 mg, 11%).

<sup>1</sup>H NMR (400 MHz, CD<sub>3</sub>OD):  $\delta$  8.36-8.31 (m, 1H), 8.06 (d,  $J$ =8.2 Hz, 1H), 8.03-7.98 (m, 1H), 7.89-7.84 (m, 1H), 7.62 (3H, m), 7.05 (s, 1H isoxazole CH), 4.37 (d,  $J$ =10.0 Hz, 1H, **H**<sup>1</sup>), 4.01 (d,  $J$ =3.1 Hz, 1H, **H**<sup>4</sup>), 3.89 (t,  $J$ =9.4 Hz 1H, **H**<sup>2</sup>), 3.81 (dd  $J$ =10.0 Hz, 4.3 Hz 1H **H**<sup>5</sup>), 3.77-3.68 (m, 2H), 3.64 (dd,  $J$ =9.4Hz, 3.3 Hz, 1H, **H**<sup>3</sup>)

<sup>13</sup>C NMR (100 MHz, CD<sub>3</sub>OD):  $\delta$  169.75, 163.40, 133.96, 130.67, 130.10, 128.44, 127.28, 127.08, 126.17, 124.90, 124.44, 102.37, 79.72, 75.13, 74.65, 70.11, 69.42, 61.45

HRMS: M+Na; 380.1115 found, 380.1110 calculated.

$[\alpha]^{20}_D=21^\circ$  ( $c=0.23211$  in methanol).

Purity by HPLC (UV/VIS detector 254 nm): 99.3%

### 3-Naphth-2-yl-5-(1-deoxy- $\beta$ -D-galactopyranosyl)isoxazole **3c**

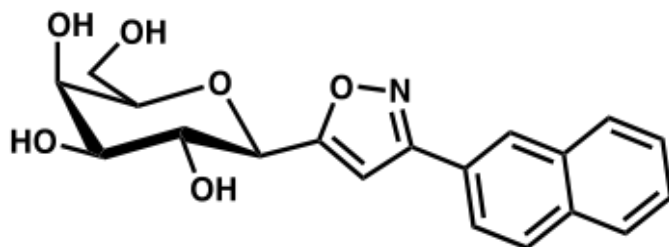

Compound **9c** (79 mg, 0.155 mmol) was dissolved in dry THF (3 mL) with hydroxylamine hydrochloride (27 mg, 0.388 mmol) and sodium carbonate (30 mg, 0.620 mmol) and refluxed overnight under nitrogen. The reaction was poured into ethyl acetate (30 mL) and washed with brine. The brine was extracted two times with ethyl acetate (30mL), the organic phases were pooled, dried with anhydrous sodium sulfate and evaporated. The crude was dissolved in dry methanol (2 mL) with of sodium methoxide (16 mg, 0.422 mmol). After 3 hours the reaction was quenched by addition of Amberlite IR-120 (H<sup>+</sup>) until pH 7, filtered & evaporated. The crude was purified first with column chromatography (5:1 dichloromethane/methanol) and then with prep-HPLC to give **3c** (17 mg, 40%).

$^1\text{H}$  NMR (400 MHz,  $\text{CD}_3\text{OD}$ ):  $\delta$  8.41 (d,  $J=1.2$  Hz, 1H), 8.04-8.00 (m, 2H), 7.95-7.91 (m, 2H), 7.61-7.57 (m, 2H) 7.11 (s, 1H isoxazole CH), 4.37 (d,  $J=10.0$  Hz, 1H,  $\text{H}^1$ ), 4.01 (d,  $J=3.1$  Hz, 1H,  $\text{H}^4$ ), 3.89 (t,  $J=9.4$  Hz 1H,  $\text{H}^2$ ), 3.81 (dd  $J=10.0$  Hz, 4.3 Hz 1H  $\text{H}^5$ ), 3.77-3.68 (m, 2H), 3.64 (dd,  $J=9.4$ Hz, 3.2 Hz, 1H,  $\text{H}^3$ )

$^{13}\text{C}$  NMR (100 MHz,  $\text{CD}_3\text{OD}$ ):  $\delta$  128.68, 128.31, 127.51, 127.12, 126.69, 124.98, 122.40, 98.74, 79.72, 75.13, 74.65, 70.11, 69.42, 61.45

HRMS:  $\text{M}+\text{H}$ ; 358.1292 found 358.1291 calculated

$[\alpha]^{20}_{\text{D}} = 21^\circ$  ( $c=0.22913$  in methanol).

Purity by HPLC (UV/VIS detector 254 nm): 96.6%

### 3-Naphth-1-yl-5-(1-deoxy- $\beta$ -D-galactopyranosyl)-1H-pyrazole **4b**

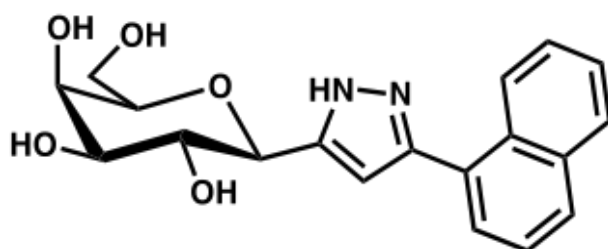

Compound **9b** (137 mg, 0.269 mmol) was dissolved in THF (6 mL) and sodium carbonate (120 mg, 1.128 mmol) and hydrazine hydrate (130  $\mu\text{L}$ , 1.694 mmol, 64%) were added. The reaction mixture was refluxed overnight, cooled to room temperature, filtrated and evaporated. Column chromatography (5:1 dichloromethane/methanol) followed by prep-HPLC (20 min gradient from 10% acetonitrile/90% water with 0.1% formic acid to 100% acetonitrile) gave **4b** (74 mg, 77%).

$^1\text{H}$  NMR (400 MHz,  $\text{CD}_3\text{OD}$ ):  $\delta$  8.31-8.25 (m, 1H), 7.96-7.89 (m, 2H), 7.62 (dd,  $J=7.2$ , Hz, 1.2 Hz, 1H), 7.57-7.47 (m, 3H) 6.77 (s, 1H pyrazole CH), 4.33 (d,  $J=9.9$  Hz, 1H,  $\text{H}^1$ ), 3.98 (d,  $J=3.0$  Hz, 1H,  $\text{H}^4$ ), 3.90 (t,  $J=9.6$  Hz 1H,  $\text{H}^2$ ), 3.83 (dd  $J=11.2$  Hz, 7.1 Hz, 1H  $\text{H}^5$ ), 3.77-3.68 (m, 2H), 3.61 (dd,  $J=9.0$  Hz, 3.3 Hz, 1H,  $\text{H}^3$ )

$^{13}\text{C}$  NMR (100 MHz,  $\text{CD}_3\text{OD}$ ):  $\delta$  146.76, 133.96, 131.36, 129.87, 128.37, 128.00, 126.77, 125.66, 125.28, 124.93, 101.12, 79.45, 75.70, 74.89, 70.95, 69.56, 61.57

HRMS:  $\text{M}+\text{H}$ ; 357.1459 found, 357.1450 calculated.

$[\alpha]^{20}_{\text{D}} = 19^\circ$  ( $c=0.22521$  in methanol).

Purity by HPLC (UV/VIS detector 254 nm): 97.3%

### 3-Naphth-2-yl-5-(1-deoxy- $\beta$ -D-galactopyranosyl)-1H-pyrazole **4c**

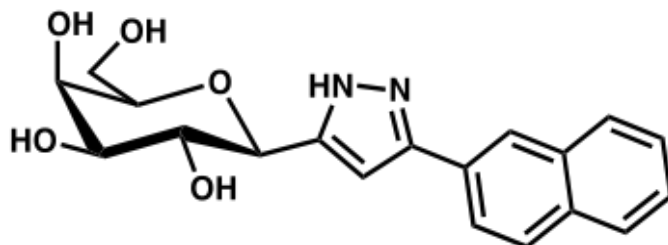

Compound **9c** (146 mg, 0.286 mmol) was dissolved in THF (6 mL) and sodium carbonate (76 mg, 0.715 mmol) and hydrazine hydrate (32  $\mu\text{L}$ , 0.429 mmol, 64%) were added. The reaction mixture was refluxed overnight, poured into ethyl acetate (30mL), washed with brine (30mL) which was extracted twice with ethyl acetate (30mL). The organic phases were pooled, dried with sodium sulfate

and evaporated. The crude was dissolved in dry methanol (6 mL) with sodium methoxide (187 mg, 3.46 mmol) under nitrogen and left for 4 hours. Upon completion, the reaction was quenched with Amberlite IR-120 (H<sup>+</sup>) until pH 7, filtered and evaporated. Column chromatography (5:1 dichloromethane/methanol) followed by prep-HPLC (20 min gradient from 10% acetonitrile/90% water with 0.1% formic acid to 100% acetonitrile) gave **4c** (90 mg, 88%).

<sup>1</sup>H NMR (400 MHz, CD<sub>3</sub>OD): δ 8.24 (s, 1H), 7.99-7.80 (m, 4H), 7.55-7.44 (m, 2H), 6.92 (s, 1H pyrazole CH), 4.33 (d, *J* = 9.9 Hz, 1H, **H**<sup>1</sup>), 3.98 (d, *J* = 3.0 Hz, 1H, **H**<sup>4</sup>), 3.90 (t, *J* = 9.6 Hz, 1H, **H**<sup>2</sup>), 3.83 (dd, *J* = 11.2 Hz, 7.1 Hz, 1H, **H**<sup>5</sup>), 3.77-3.68 (m, 2H), 3.61 (dd, *J* = 9.0 Hz, 3.3 Hz, 1H, **H**<sup>3</sup>)

<sup>13</sup>C NMR (100 MHz, CD<sub>3</sub>OD): δ 133.63, 133.13, 127.75, 127.33, 123.78, 101.44, 79.45, 75.70, 74.89, 70.95, 69.56, 61.57

HRMS: *M*+*H*; 357.1457 found, 157.1450 calculated.

[α]<sub>D</sub><sup>20</sup> = 23° (*c* = 0.42031 in methanol).

Purity by HPLC (UV/VIS detector 254 nm): 97.3%

### 1-Naphth-1-yl-3-(2,3,4,6-tetra-*O*-acetyl-β-D-galactopyranosyl)-prop-2-yn-1-one **9b**

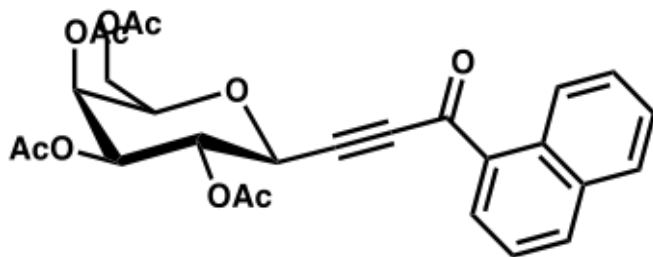

Compound **8** (150 mg, 0.421 mmol), 1-naphthoyl chloride (85 mg, 0.463 mmol), bis(triphenylphosphine) palladium(II) dichloride (15 mg, 0.021 mmol) and copper(I) iodide (12 mg, 0.063 mmol) were dissolved in dry THF (5 mL) and triethylamine (0.120 mL, 0.842 mmol) was added. The reaction mixture goes from pale yellow to a deep orange upon triethylamine addition. After 15 mins, the reaction mixture was poured into ethyl acetate (40 mL), washed with brine (40 mL), the brine was extracted twice with ethyl acetate (40 mL), the organic phases pooled, dried with sodium sulfate and evaporated. Column chromatography (2:1 heptane/ethyl acetate) gave **9b** (137 mg, 64%).

<sup>1</sup>H NMR (400 MHz, CDCl<sub>3</sub>): δ 9.19 (dd, *J*<sub>1</sub> = 8.5 Hz, *J*<sub>2</sub> = 0.8 Hz, 1H), 8.53 (dd, *J* = 7.3 Hz, 1.3 Hz, 1H), 8.13 (d, *J* = 8.2 Hz, 1H), 7.96-7.91 (m, 1H), 7.73-7.67 (m, 1H), 7.65-7.58 (m, 2H), 5.59 (t, *J* = 10.1 Hz, 1H, **H**<sup>2</sup>), 5.50 (dd, *J* = 3.4 Hz, 1.0 Hz, 1H, **H**<sup>4</sup>), 5.11 (dd, *J* = 10.2 Hz, 3.3 Hz, 1H, **H**<sup>3</sup>), 4.51 (d, *J* = 10.1 Hz, 1H, **H**<sup>1</sup>), 4.22-4.17 (m, 2H), 4.04-3.99 (m, 1H, **H**<sup>5</sup>), 2.22 (s, 3H), 2.14 (s, 3H), 2.11 (s, 3H), 2.04 (s, 3H)

<sup>13</sup>C NMR (100 MHz, CDCl<sub>3</sub>): δ 135.78, 135.59, 129.31, 128.66, 126.95, 125.86, 124.48, 85.04, 74.99, 71.41, 69.17, 67.77, 67.26, 61.59, 20.71, 20.62

[α]<sub>D</sub><sup>20</sup> = -12° (*c* = 0.59553 in chloroform).

HRMS: *M*+*H*; 511.1601 found, 511.1604 calculated.

**1-Naphth-2-yl-3-(2,3,4,6-tetra-*O*-acetyl- $\beta$ -D-galactopyranosyl)-prop-2-yn-1-one **9c****

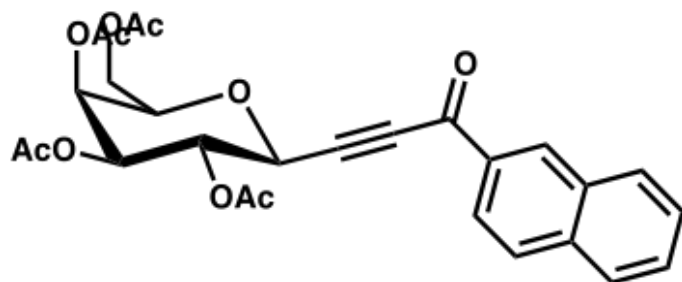

Compound **8** (150 mg, 0.421 mmol), 2-naphthoyl chloride (88 mg, 0.463 mmol), bis(triphenylphosphine) palladium(II) dichloride (15 mg, 0.021 mmol) and copper(I) iodide (12 mg, 0.063 mmol) were dissolved in dry THF (5 mL) and triethylamine (0.120 mL, 0.842 mmol) was added. The reaction mixture goes from pale yellow to a deep orange upon triethylamine addition. After 1 hour, the reaction mixture was poured into ethyl acetate (40 mL), washed with brine (40 mL), the brine was extracted twice with ethyl acetate (40 mL), the organic phases pooled, dried with sodium sulfate and evaporated. Column chromatography (1.5:1 heptane/ethyl acetate) gave **9c** (146 mg, 68%).

$^1\text{H}$  NMR (400 MHz,  $\text{CDCl}_3$ ):  $\delta$  8.71 (s, 1H), 8.16-8.08 (m, 2H), 7.95-7.90 (m, 2H), 7.71-7.60 (m, 2H), 5.65 (t,  $J=10.2$  Hz, 1H, **H**<sup>2</sup>), 5.52 (dd,  $J=3.4$  Hz, 1.0 Hz, 1H, **H**<sup>4</sup>), 5.13 (dd,  $J=10.2$  Hz, 3.3 Hz, 1H, **H**<sup>3</sup>), 4.54 (d,  $J=9.8$  Hz, 1H, **H**<sup>1</sup>), 4.22-4.19 (m, 2H), 4.04-3.99 (m, 1H, **H**<sup>5</sup>), 2.23 (s, 3H), 2.15 (s, 3H), 2.11 (s, 3H), 2.05 (s, 3H)

$^{13}\text{C}$  NMR (100 MHz,  $\text{CDCl}_3$ ):  $\delta$  176.82, 170.48, 170.22, 170.06, 169.56, 136.40, 133.59, 132.51, 129.99, 129.37, 128.69, 127.94, 127.12, 123.46, 86.09, 83.64, 75.07, 71.41, 69.13, 67.79, 67.26, 61.60, 20.79, 20.75, 20.72, 20.62

$[\alpha]^{20}_{\text{D}} = -7^\circ$  ( $c=0.67860$  in chloroform).

HRMS:  $\text{M}+\text{H}^+$ ; 511.1612 found, 511.1604 calculated.

**2-Naphth-1-yl-5-(2,3,4,6-tetra-*O*-acetyl-1-deoxy- $\beta$ -D-galactopyranosyl)oxazole **10b****

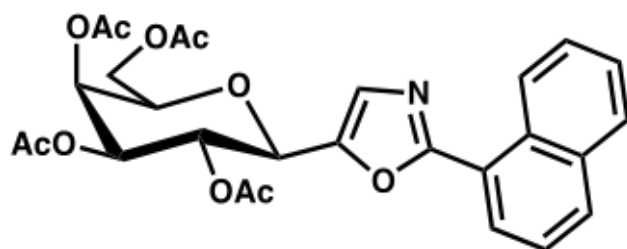

Compound **8** (100 mg, 0.281 mmol), 8-methylquinoline N-oxide (67 mg, 0.421 mmol), [bis(trifluoromethanesulfonyl)imidate](triphenylphosphine)gold(I) 2:1 toluene adduct (22 mg, 0.028 mmol) and 1-cyanonaphthalene (150 mg, 0.980 mmol) were mixed, and heated to 75°C where the mixture melted. The reaction was left under nitrogen for 48 hours, then diluted with ethyl acetate (20 mL) and washed with brine (20 mL). The brine was extracted two times with ethyl acetate (20 mL), the organic phases were pooled, dried with anhydrous sodium sulfate and evaporated. Column chromatography (1.5:1 heptane/ethyl acetate) gave **10b** (49 mg, 33%).

$^1\text{H}$  NMR (400 MHz,  $\text{CDCl}_3$ ):  $\delta$  9.23 (d,  $J=8.7$  Hz, 1H), 8.25 (dd,  $J=7.3$  Hz, 1.2 Hz, 1H), 8.00 (d,  $J=8.3$  Hz, 1H), 7.94 (d,  $J=7.8$ , 1H), 7.70-7.65 (m, 1H), 7.62-7.56 (m, 2H), 7.41 (s, 1H, oxazole CH), 5.77 (t,  $J=10.1$  Hz, 1H,  $\text{H}^2$ ), 5.57 (dd,  $J=3.5$  Hz, 0.9 Hz, 1H,  $\text{H}^4$ ), 5.24 (dd,  $J=10.4$  Hz, 3.4 Hz, 1H,  $\text{H}^3$ ), 4.73 (d,  $J=10.1$  Hz, 1H,  $\text{H}^1$ ), 4.23-4.12 (m, 3H), 2.26 (s, 3H), 2.09 (s, 3H), 2.06 (s, 3H), 1.96 (s, 3H)

$^{13}\text{C}$  NMR (100 MHz,  $\text{CDCl}_3$ ):  $\delta$  134.16, 134.01, 131.65, 131.19, 129.13, 129.02, 128.59, 128.41, 127.89, 127.67, 126.38, 126.00, 124.99, 74.77, 72.23, 72.07, 67.46, 66.94, 61.64, 20.80, 20.75, 20.63

$[\alpha]^{20}_{\text{D}} = -3^\circ$  ( $c=0.30249$  in chloroform).

HRMS:  $\text{M}+\text{H}$ ; 526.1719 found, 526.1713 calculated

**2-Naphth-2-yl-5-(2,3,4,6-tetra-*O*-acetyl-1-deoxy- $\beta$ -D-galactopyranosyl)oxazole 10c**

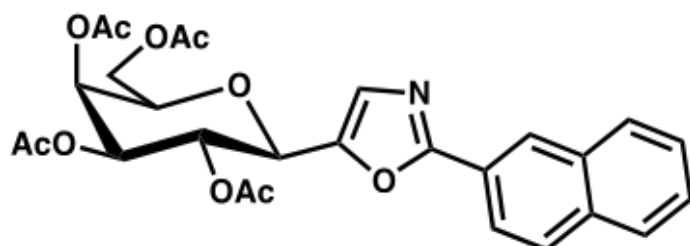

Compound **8** (100 mg, 0.281 mmol), 8-methylquinoline N-oxide (67 mg, 0.421 mmol), [bis(trifluoromethanesulfonyl)imidate](triphenylphosphine)gold(I) 2:1 toluene adduct (22 mg, 0.028 mmol) and 2-cyanonaphthalene (150 mg, 0.980 mmol) were mixed, and heated to  $75^\circ\text{C}$  where the mixture melted. The reaction was left under nitrogen for 48 hours, then diluted with ethyl acetate (25 mL) and washed with brine (40 mL). The brine was extracted two times with ethyl acetate (20 mL), the organic phases were pooled, dried with anhydrous sodium sulfate and evaporated. Column chromatography (1.5:1 heptane/ethyl acetate) gave **10c** (35 mg, 25%).

$^1\text{H}$  NMR (400 MHz,  $\text{CDCl}_3$ ):  $\delta$  8.59 (d,  $J=1.3$  Hz, 1H), 8.15 (dd,  $J=8.7$  Hz, 1.6 Hz, 1H), 8.00-7.87 (m, 3H), 7.59-7.55 (m, 2H), 7.32 (s, 1H, oxazole CH), 5.73 (t,  $J=10.1$  Hz, 1H,  $\text{H}^2$ ), 5.57 (dd,  $J=3.5$  Hz, 0.9 Hz, 1H,  $\text{H}^4$ ), 5.22 (dd,  $J=10.4$  Hz, 3.4 Hz, 1H,  $\text{H}^3$ ), 4.71 (d,  $J=10.1$  Hz, 1H,  $\text{H}^1$ ), 4.23-4.11 (m, 3H), 2.28 (s, 3H), 2.09 (s, 3H), 2.05 (s, 3H), 1.95 (s, 3H)

$^{13}\text{C}$  NMR (100 MHz,  $\text{CDCl}_3$ ):  $\delta$  170.47, 170.37, 170.17, 169.16, 146.61, 128.82, 128.71, 128.19, 127.89, 127.47, 126.82, 126.76, 123.35, 74.74, 72.25, 72.09, 67.43, 66.85, 61.59, 20.82, 20.75, 20.62

$[\alpha]^{20}_{\text{D}} = -8^\circ$  ( $c=0.20941$  in chloroform).

HRMS:  $\text{M}+\text{H}$ ; 526.1712 found, 526.1713 calculated.



**2-(4-Chlorophenyl)-5-(2,3,4,6-tetra-*O*-acetyl-1-deoxy- $\beta$ -D-galactopyranosyl)oxazole 10d**

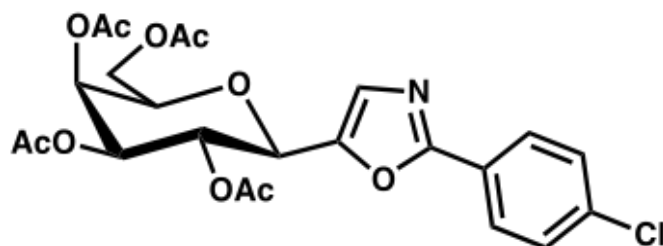

Compound **8** (50 mg, 0.140 mmol), 8-methylquinoline N-oxide (49 mg, 0.182 mmol), [bis(trifluoromethanesulfonyl)imidate](triphenylphosphine)gold(I) 2:1 toluene adduct (11 mg, 0.007 mmol) and of 4-chlorobenzonitrile (116 mg, 0.840 mmol) was sealed in a tube under nitrogen, heated to 75°C under nitrogen, and left for 3 days. The reaction was diluted with ethyl acetate (20 mL), poured into brine (20 mL) and extracted two times with ethyl acetate (20 mL). The organic phases were pooled, dried with anhydrous sodium sulfate and evaporated. Column chromatography (1:1 heptane/ethyl acetate) gave yellow powdered **10d** (9 mg, 19%).

$^1\text{H}$  NMR (400 MHz,  $\text{CDCl}_3$ ):  $\delta$  8.04-7.98 (m, 2H), 7.49-7.44 (m, 2H), 7.28 (s, 1H, oxazole CH), 5.67 (t,  $J=10.1$  Hz, 1H,  $\text{H}^2$ ). 5.55 (dd,  $J=3.5$  Hz, 1.0 Hz, 1H,  $\text{H}^4$ ), 5.19 (dd,  $J=10.1$  Hz, 3.4 Hz, 1H,  $\text{H}^3$ ), 4.64 (d,  $J=10.0$  Hz, 1H,  $\text{H}^1$ ), 4.21-4.08 (m, 3H), 2.25 (s, 3H), 2.08 (s, 3H), 2.03 (s, 3H), 1.93 (s, 3H)

$^{13}\text{C}$  NMR (100 MHz,  $\text{CDCl}_3$ ):  $\delta$  170.45, 170.31, 170.13, 169.12, 161.76, 146.63, 136.93, 129.16, 128.22, 127.91, 125.56, 74.74, 72.11, 71.99, 67.38, 66.77, 61.56, 20.79, 20.73, 20.62, 20.59

HRMS:  $\text{M}+\text{H}^+$ ; 510.1167 found, 510.1167 calculated.

$[\alpha]^{20}_{\text{D}} = -11^\circ$  ( $c=0.23056$  in chloroform).

**2-(3-Chlorophenyl)-5-(2,3,4,6-tetra-*O*-acetyl-1-deoxy- $\beta$ -D-galactopyranosyl)oxazole 10e**

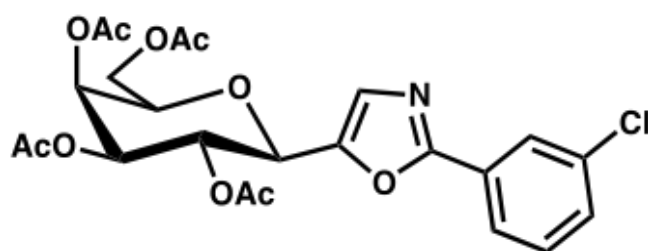

Compound **8** (50 mg, 0.140 mmol), 8-methylquinoline N-oxide (49 mg, 0.182 mmol), [bis(trifluoromethanesulfonyl)imidate](triphenylphosphine)gold(I) 2:1 toluene adduct (11 mg, 0.007 mmol) and 3-chlorobenzonitrile (116 mg, 0.840 mmol) were sealed in a tube under nitrogen, heated to 50°C under nitrogen, and left for 3 days. The reaction was diluted with ethyl acetate (20 mL), poured into brine (20 mL) and extracted two times with ethyl acetate (20 mL). The organic phases were pooled, dried with anhydrous sodium sulfate and evaporated. Column chromatography (1:1 heptane/ethyl acetate) gave yellow powdered **10e** (8 mg, 11%).

$^1\text{H}$  NMR (400 MHz,  $\text{CDCl}_3$ ):  $\delta$  8.07 (t,  $J=1.7$  Hz, 1H), 7.96 (dt,  $J_1=7.3$  Hz, 1.7 Hz, 1H), 7.48-7.40 (m, 2H), 7.27 (s, 1H, oxazole CH), 5.67 (t,  $J=10.0$  Hz, 1H,  $\text{H}^2$ ). 5.55

(dd,  $J=3.6$  Hz, 1.2 Hz, 1H, **H<sup>4</sup>**), 5.20 (dd,  $J=10.0$  Hz, 3.6 Hz, 1H, **H<sup>3</sup>**), 4.65 (d,  $J=10.0$  Hz, 1H, **H<sup>1</sup>**), 4.21-4.09 (m, 3H), 2.26 (s, 3H), 2.09 (s, 3H), 2.04 (s, 3H), 1.94 (s, 3H)  
<sup>13</sup>C NMR (100 MHz, CDCl<sub>3</sub>):  $\delta$  170.45, 170.32, 170.12, 169.11, 134.94, 130.76, 130.17, 128.69, 128.19, 126.66, 124.70, 74.78, 72.14, 71.97, 67.38, 66.82, 61.57, 20.80, 20.73, 20.62, 20.58  
 HRMS: M+H; 510.1177 found, 510.1167 calculated.  
 $[\alpha]^{20}_D = -8^\circ$  ( $c=0.27875$  in chloroform)..

**2-(4-Methylphenyl)-5-(2,3,4,6-tetra-*O*-acetyl-1-deoxy- $\beta$ -D-galactopyranosyl)oxazole 10f**

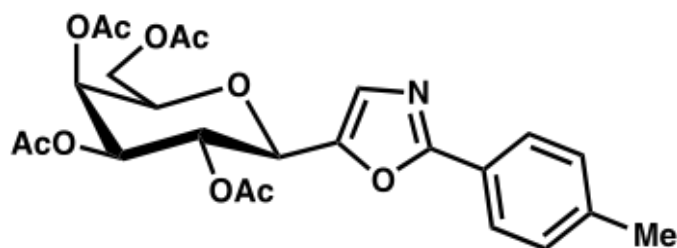

Compound **8** (50 mg, 0.140 mmol), 8-methylquinoline N-oxide (49 mg, 0.182 mmol), [bis(trifluoromethanesulfonyl)imidate](triphenylphosphine)gold(I) 2:1 toluene adduct (11 mg, 0.007 mmol) and p-tolunitrile (99 mg, 0.840 mmol) were sealed in a tube under nitrogen, heated to 75°C under nitrogen, and left for 3 days. The reaction was diluted with ethyl acetate (20 mL), poured into brine (20 mL) and extracted two times with ethyl acetate (20 mL). The organic phases were pooled, dried with anhydrous sodium sulfate and evaporated. Column chromatography (1:1 heptane/ethyl acetate) gave yellow powdered **10f** (3 mg, 4%).

<sup>1</sup>H NMR (400 MHz, CDCl<sub>3</sub>):  $\delta$  7.98-7.94 (m, 2H), 7.31-7.27 (m, 3H), 7.79-7.74 (m, 1H), 5.68 (t,  $J=10.1$  Hz, 1H, **H<sup>2</sup>**), 5.54 (dd,  $J=3.4$  Hz, 1.0 Hz, 1H, **H<sup>4</sup>**), 5.19 (dd,  $J=10.2$  Hz, 3.8 Hz, 1H, **H<sup>3</sup>**), 4.65 (d,  $J=9.6$  Hz, 1H, **H<sup>1</sup>**), 4.23-4.08 (m, 3H), 2.43, (s, 3H, phenyl methyl H), 2.25 (s, 3H), 2.08 (s, 3H), 2.04 (s, 3H), 1.94 (s, 3H)  
<sup>13</sup>C NMR (100 MHz, CDCl<sub>3</sub>):  $\delta$  170.47, 170.36, 170.17, 169.10, 141.13, 130.20, 129.52, 129.20, 127.92, 126.58, 124.37, 118.10, 74.67, 72.20, 72.08, 67.43, 66.81, 61.59, 21.57, 20.80, 20.74, 20.63, 20.60  
 HRMS: M+H; 490.1707 found, 490.1713 calculated.  
 $[\alpha]^{20}_D = -13^\circ$  ( $c=0.18849$  in chloroform).

**2-(3-Methylphenyl)-5-(2,3,4,6-tetra-*O*-acetyl-1-deoxy- $\beta$ -D-galactopyranosyl)oxazole **10g****

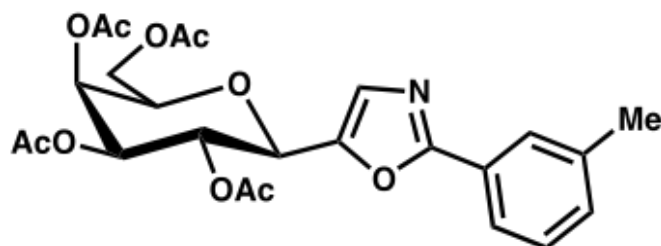

Compound **8** (50 mg, 0.140 mmol), 8-methylquinoline N-oxide (49 mg, 0.182 mmol), [bis(trifluoromethanesulfonyl)imidate](triphenylphosphine)gold(I) 2:1 toluene adduct (11 mg, 0.007 mmol) and m-tolunitrile (99 mg, 0.840 mmol) were sealed in a tube under nitrogen, heated to 75°C under nitrogen, and left for 3 days. The reaction was diluted with ethyl acetate (20 mL), poured into brine (20 mL) and extracted two times with ethyl acetate (20 mL). The organic phases were pooled, dried with anhydrous sodium sulfate and evaporated. Column chromatography (1:1 heptane/ethyl acetate) gave yellow powdered **10g** (22 mg, 48%).

$^1\text{H}$  NMR (400 MHz,  $\text{CDCl}_3$ ):  $\delta$  7.94-7.84 (m, 2H), 7.37 (t,  $J$  = 7.6 Hz, 1H), 7.31-7.23 (m, 2H), 5.67 (t,  $J$  = 10.2 Hz, 1H, **H**<sup>2</sup>), 5.54 (dd,  $J$  = 3.5 Hz, 0.9 Hz, 1H, **H**<sup>4</sup>), 5.19 (dd,  $J$  = 9.9 Hz, 3.4 Hz, 1H, **H**<sup>3</sup>), 4.66 (d,  $J$  = 10.2 Hz, 1H, **H**<sup>1</sup>), 4.22-4.08 (m, 3H), 2.44, (s, 3H, phenyl methyl H), 2.25 (s, 3H), 2.08 (s, 3H), 2.03 (s, 3H), 1.93 (s, 3H)

$^{13}\text{C}$  NMR (100 MHz,  $\text{CDCl}_3$ ):  $\delta$  170.46, 170.35, 170.16, 169.11, 146.30, 138.60, 131.58, 128.73, 127.93, 127.17, 126.94, 123.76, 74.69, 72.21, 72.07, 67.42, 66.84, 61.58, 21.36, 20.80, 20.74, 20.63, 20.59

HRMS:  $\text{M}+\text{H}^+$ ; 490.1707 found, 490.1713 calculated

$[\alpha]_D^{20}$  =  $-6^\circ$  ( $c$  = 0.55960 in chloroform).

**2-(4-Fluorophenyl)-5-(2,3,4,6-tetra-*O*-acetyl-1-deoxy- $\beta$ -D-galactopyranosyl)oxazole **10h****

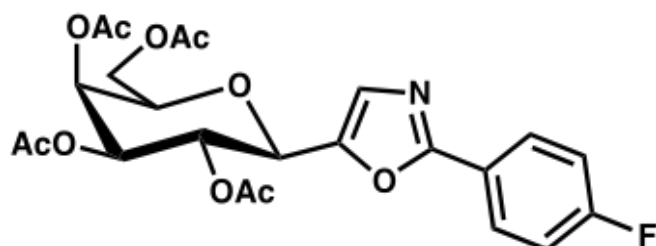

Compound **8** (50 mg, 0.140 mmol), 8-methylquinoline N-oxide (49 mg, 0.182 mmol), [bis(trifluoromethanesulfonyl)imidate](triphenylphosphine)gold(I) 2:1 toluene adduct (11 mg, 0.007 mmol) and 4-fluorobenzonitrile (102 mg, 0.840 mmol) were sealed in a tube under nitrogen, heated to 75°C under nitrogen, and left for 3 days. The reaction was diluted with ethyl acetate (20 mL), poured into brine (20 mL) and extracted two times with ethyl acetate (20 mL). The organic phases were pooled, dried with anhydrous sodium sulfate and evaporated. Column chromatography (1:1 heptane/ethyl acetate) gave yellow powdered **10h** (8 mg, 11%).

$^1\text{H}$  NMR (400 MHz,  $\text{CDCl}_3$ ):  $\delta$  8.10-8.04 (m, 2H), 7.24 (s, 1H, oxazole CH), 7.21-7.14 (m, 2H), 5.67 (t,  $J=10.8$  Hz, 1H,  $\text{H}^2$ ), 5.55 (dd,  $J=3.5$  Hz, 1.0 Hz, 1H,  $\text{H}^4$ ), 5.19 (dd,  $J=9.8$  Hz, 3.4 Hz, 1H,  $\text{H}^3$ ), 4.64 (d,  $J=10.8$  Hz, 1H,  $\text{H}^1$ ), 4.21-4.06 (m, 3H), 2.25 (s, 3H), 2.08 (s, 3H), 2.04 (s, 3H), 1.94 (s, 3H)

$^{13}\text{C}$  NMR (100 MHz,  $\text{CDCl}_3$ ):  $\delta$  170.45, 170.31, 170.14, 169.12, 146.42, 128.86, 128.77, 128.14, 116.15, 115.93, 74.72, 72.13, 72.01, 67.39, 66.77, 61.56, 20.78, 20.74, 20.62, 20.59

HRMS:  $\text{M}+\text{H}$ ; 494.1463 found, 494.1462 calculated.

$[\alpha]^{20}_{\text{D}} = -6^\circ$  ( $c=0.20000$  in chloroform).

## 2-(3-Fluorophenyl)-5-(2,3,4,6-tetra-*O*-acetyl-1-deoxy- $\beta$ -D-galactopyranosyl)oxazole **10i**

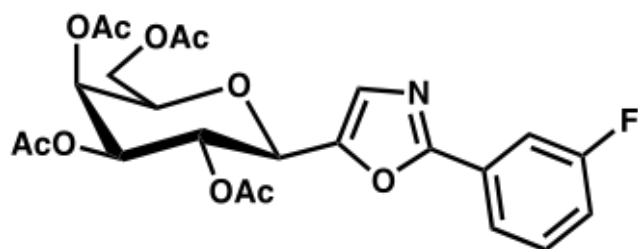

Compound **8** (50 mg, 0.140 mmol), 8-methylquinoline N-oxide (49 mg, 0.182 mmol), [bis(trifluoromethanesulfonyl)imidate](triphenylphosphine)gold(I) 2:1 toluene adduct (11 mg, 0.007 mmol) and 3-fluorobenzonitrile (101 mg, 0.840 mmol) were sealed in a tube under nitrogen, heated to  $75^\circ\text{C}$  under nitrogen, and left for 3 days. The reaction was diluted with ethyl acetate (20 mL), poured into brine (20 mL) and extracted two times with ethyl acetate (20 mL). The organic phases were pooled, dried with anhydrous sodium sulfate and evaporated. Column chromatography (1:1 heptane/ethyl acetate) gave **10i** (14 mg, 31%) as a yellow viscous oil.

$^1\text{H}$  NMR (400 MHz,  $\text{CDCl}_3$ ):  $\delta$  7.86 (d,  $J=7.8$  Hz, 1H), 7.79-7.74 (m, 1H), 7.50-7.42 (m, 1H), 7.28 (s, 1H, oxazole CH), 7.22-7.15 (m, 1H), 5.66 (t,  $J=9.9$  Hz, 1H,  $\text{H}^2$ ), 5.55 (dd,  $J=3.5$  Hz, 1.0 Hz, 1H,  $\text{H}^4$ ), 5.19 (dd,  $J=10.2$  Hz, 3.2 Hz, 1H,  $\text{H}^3$ ), 4.65 (d,  $J=10.2$  Hz, 1H,  $\text{H}^1$ ), 4.24-4.09 (m, 3H), 2.25 (s, 3H), 2.08 (s, 3H), 2.04 (s, 3H), 1.94 (s, 3H)

$^{13}\text{C}$  NMR (100 MHz,  $\text{CDCl}_3$ ):  $\delta$  170.46, 170.33, 170.14, 169.12, 161.65, 130.62, 130.54, 129.02, 128.17, 122.32, 117.87, 117.66, 113.75, 113.50, 74.76, 72.10, 71.97, 67.39, 66.81, 61.56, 20.79, 20.73, 20.62, 20.59

HRMS:  $\text{M}+\text{H}$ ; 494.1470 found, 494.1482 calculated.

$[\alpha]^{20}_{\text{D}} = -4^\circ$  ( $c=0.41667$  in chloroform).

# NMR spectra

**1a:** 1-phenyl-4-(1-deoxy- $\beta$ -D-galactopyranosyl)triazole

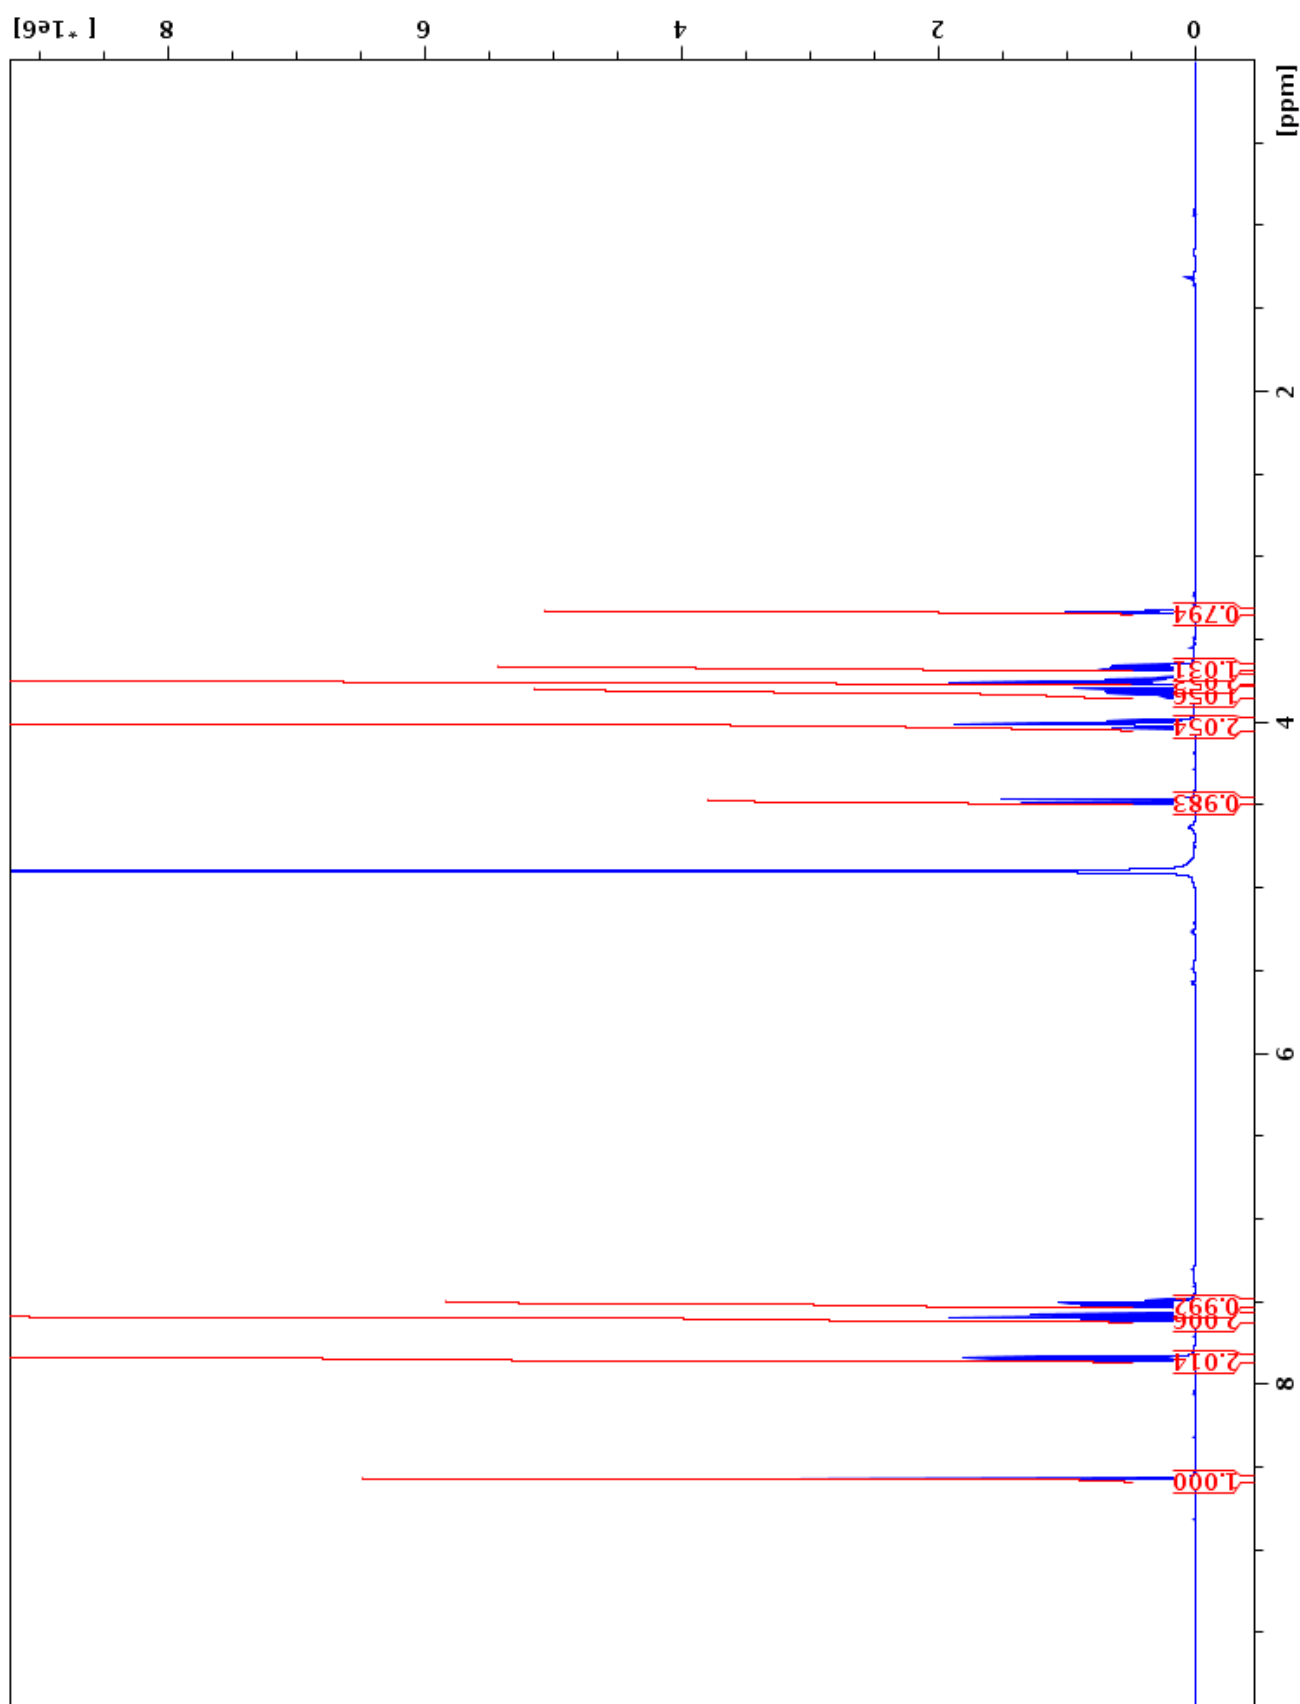

**1a:** 1-phenyl-4-(1-deoxy- $\beta$ -D-galactopyranosyl)triazole

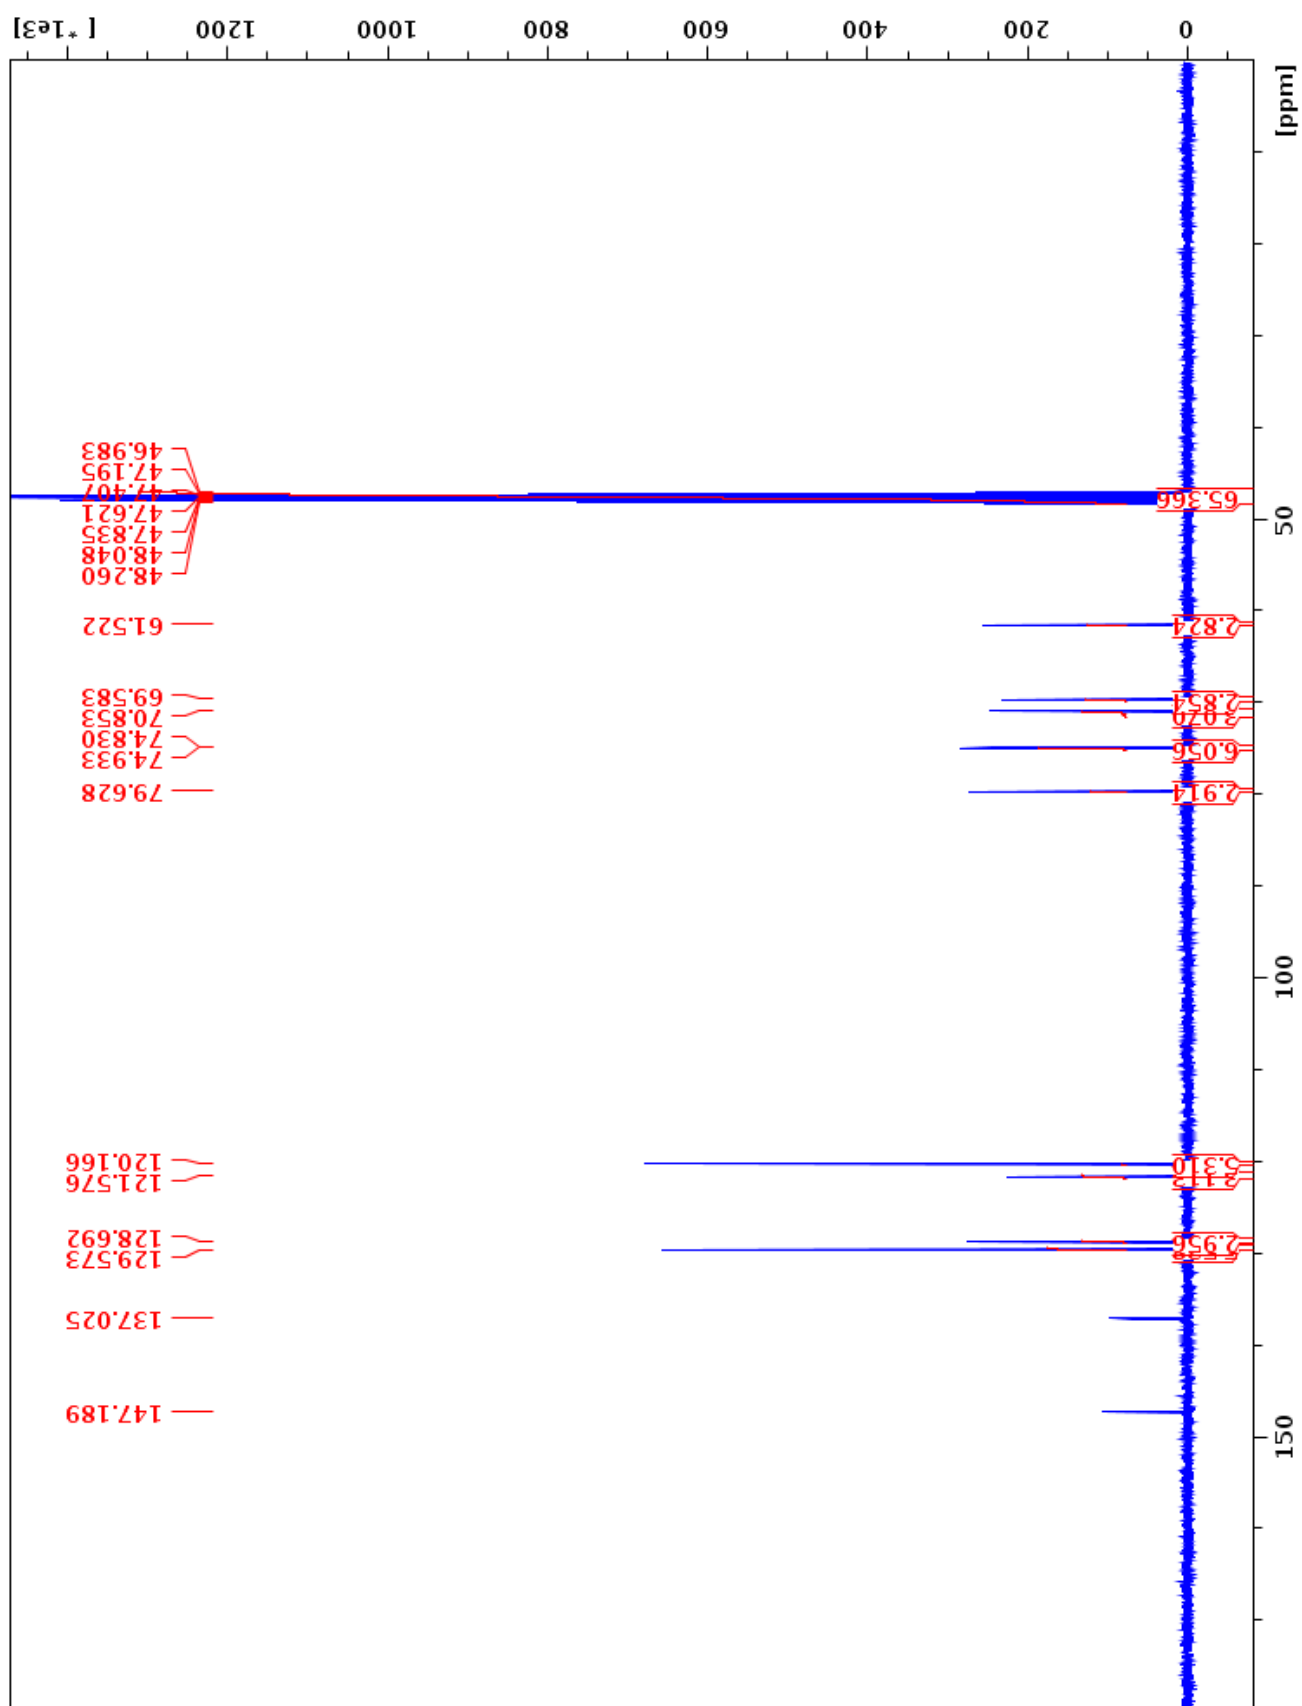

**1b:** 1-naphth-1-yl-4-(1-deoxy- $\beta$ -D-galactopyranosyl)oxazole

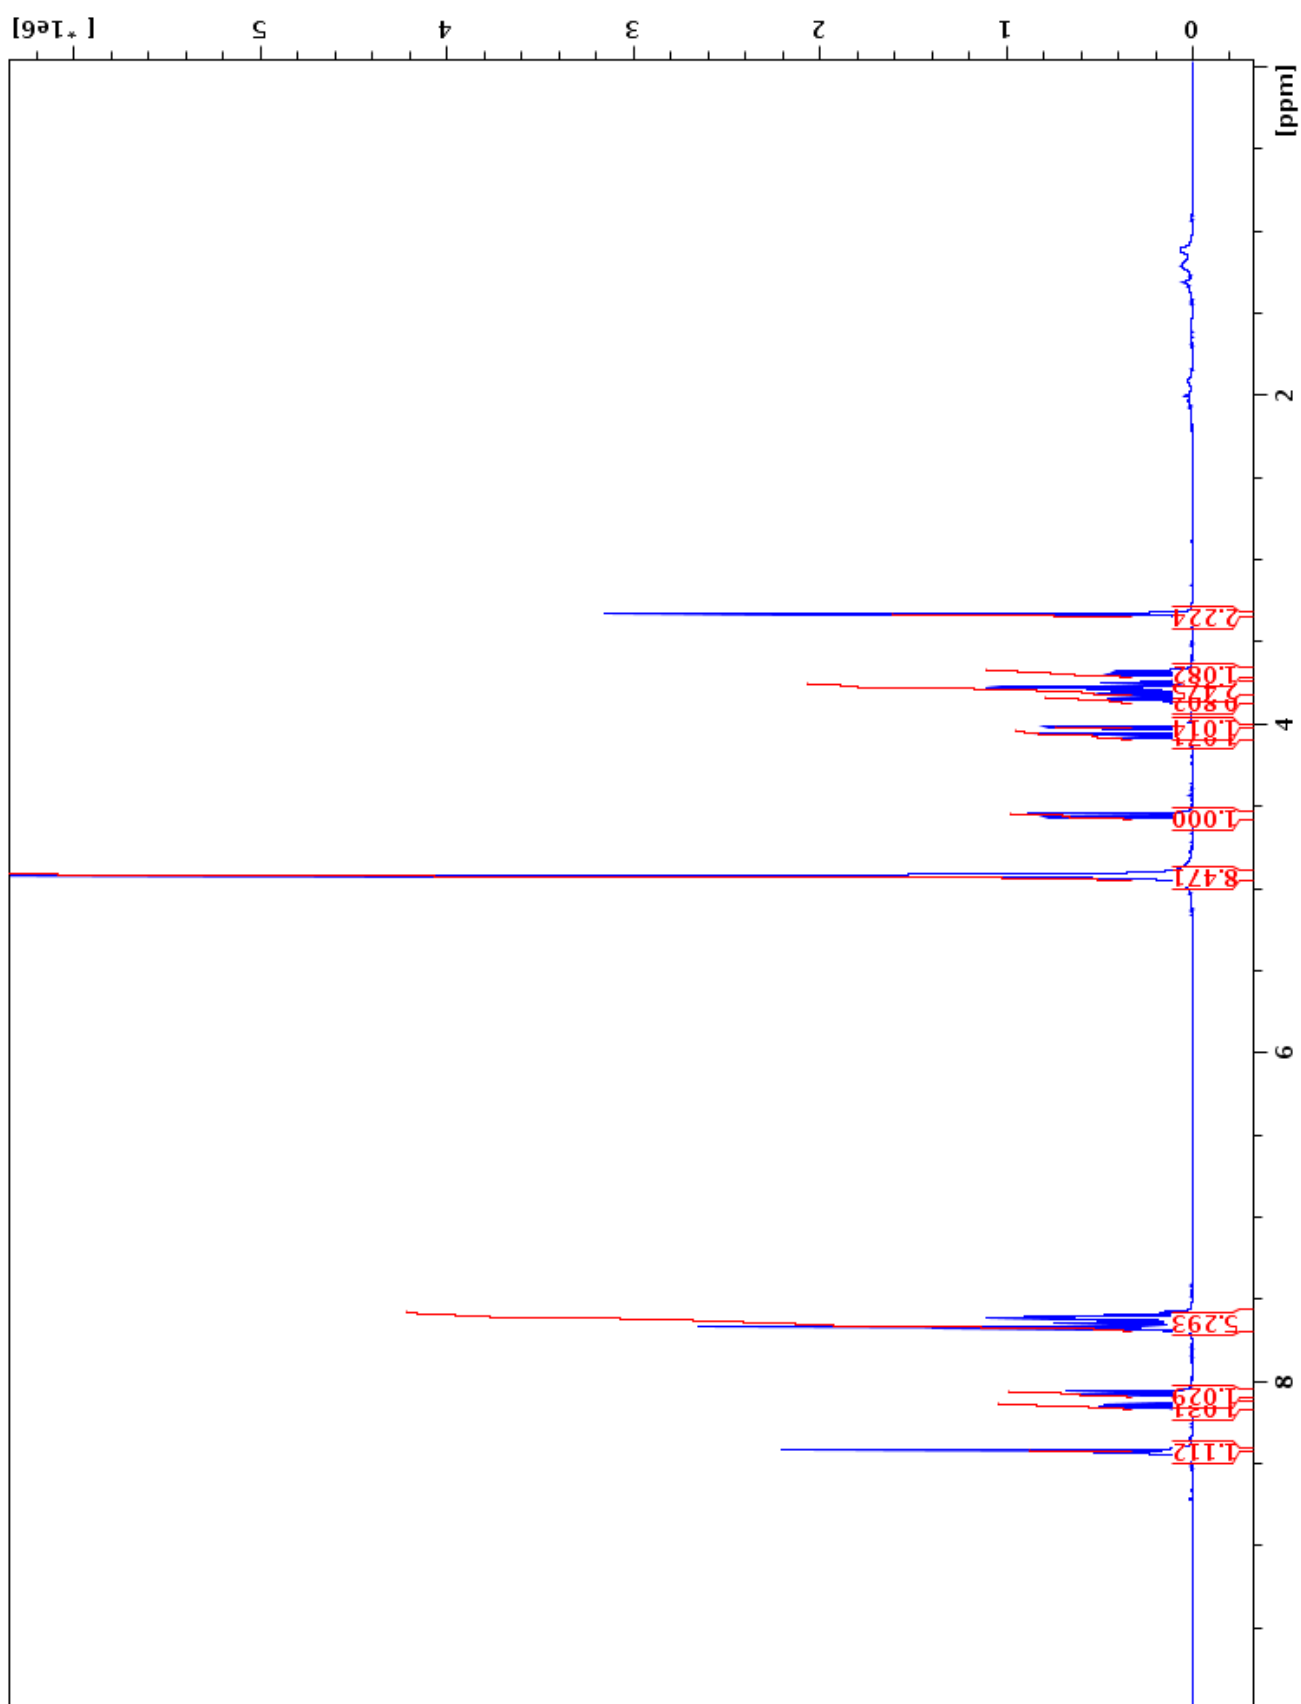

**1b:** 1-naphth-1-yl-4-(1-deoxy- $\beta$ -D-galactopyranosyl)triazole

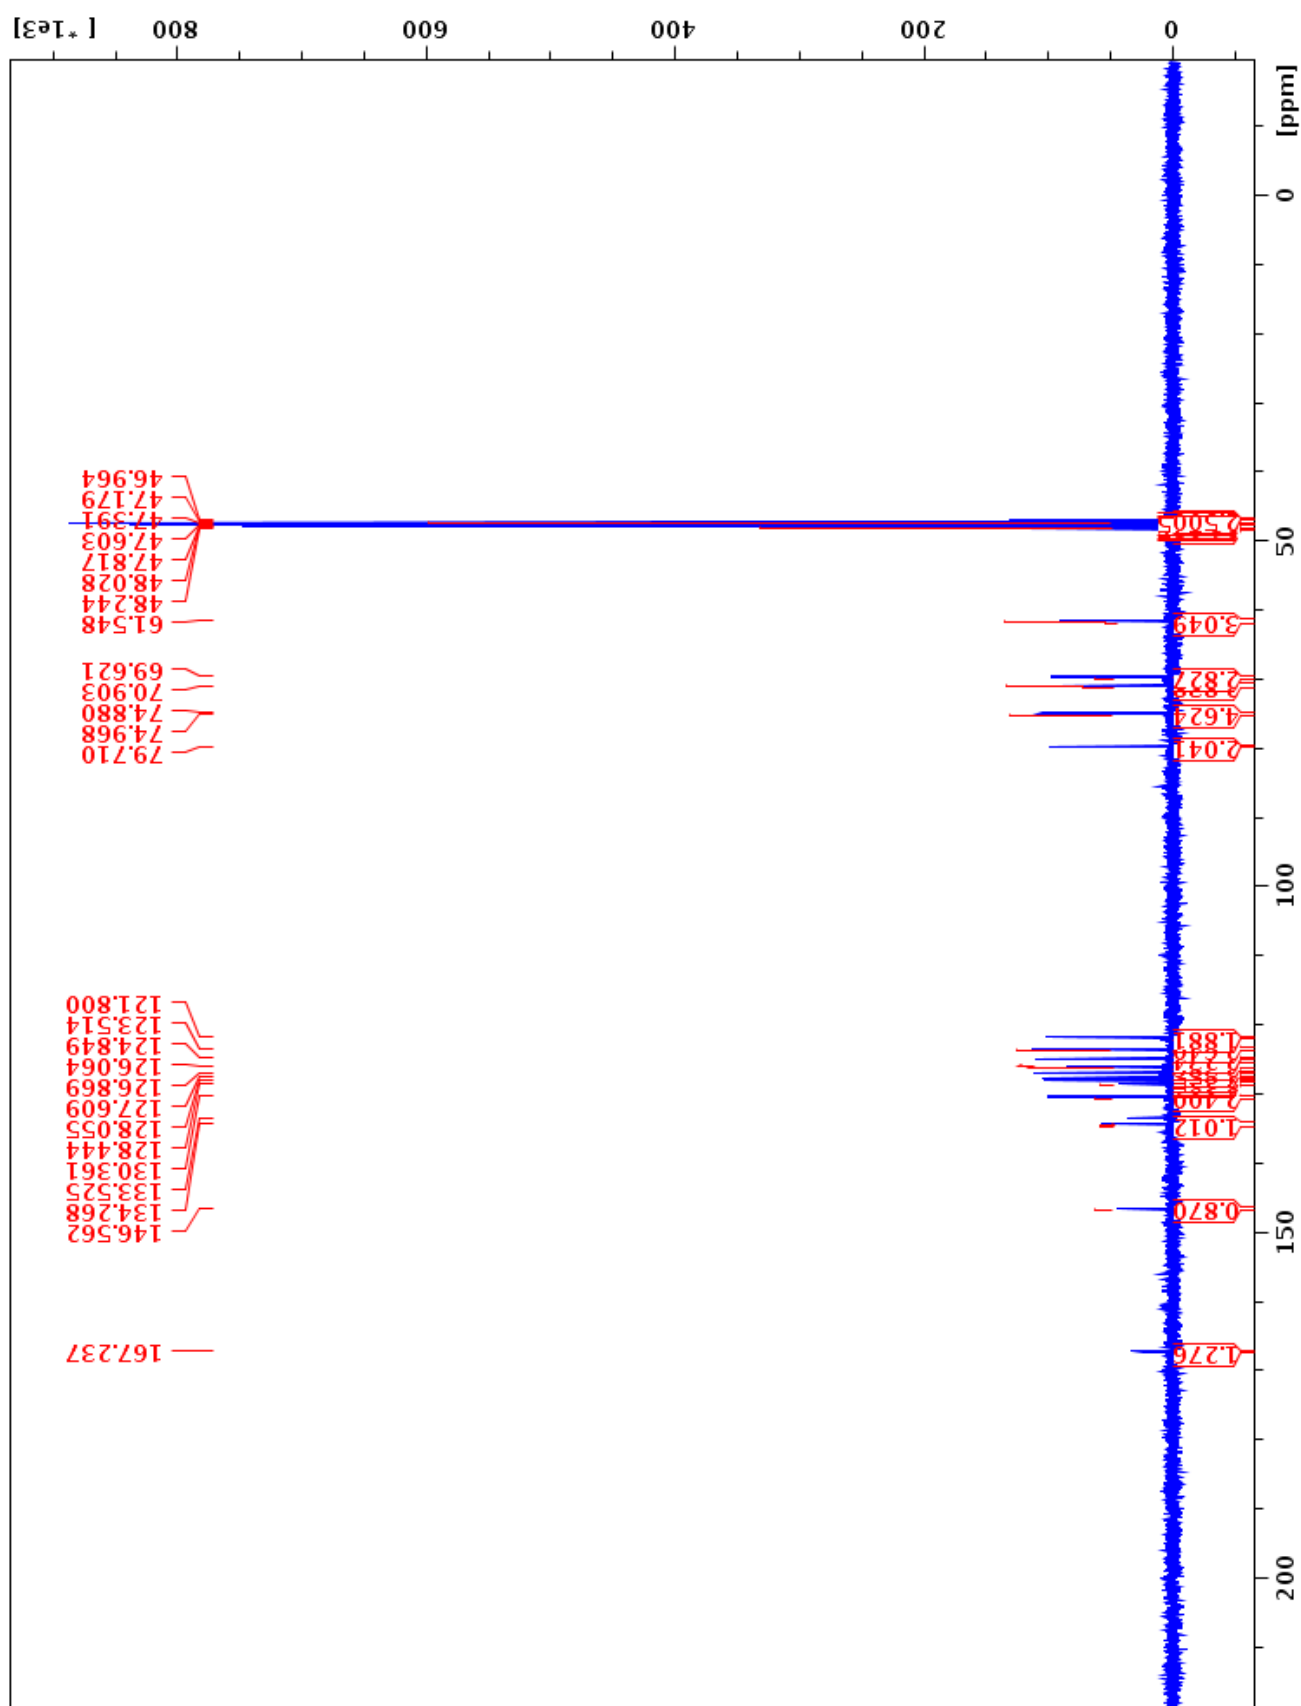



**1c:** 1-naphth-2-yl-4-(1-deoxy- $\beta$ -D-galactopyranosyl)triazole

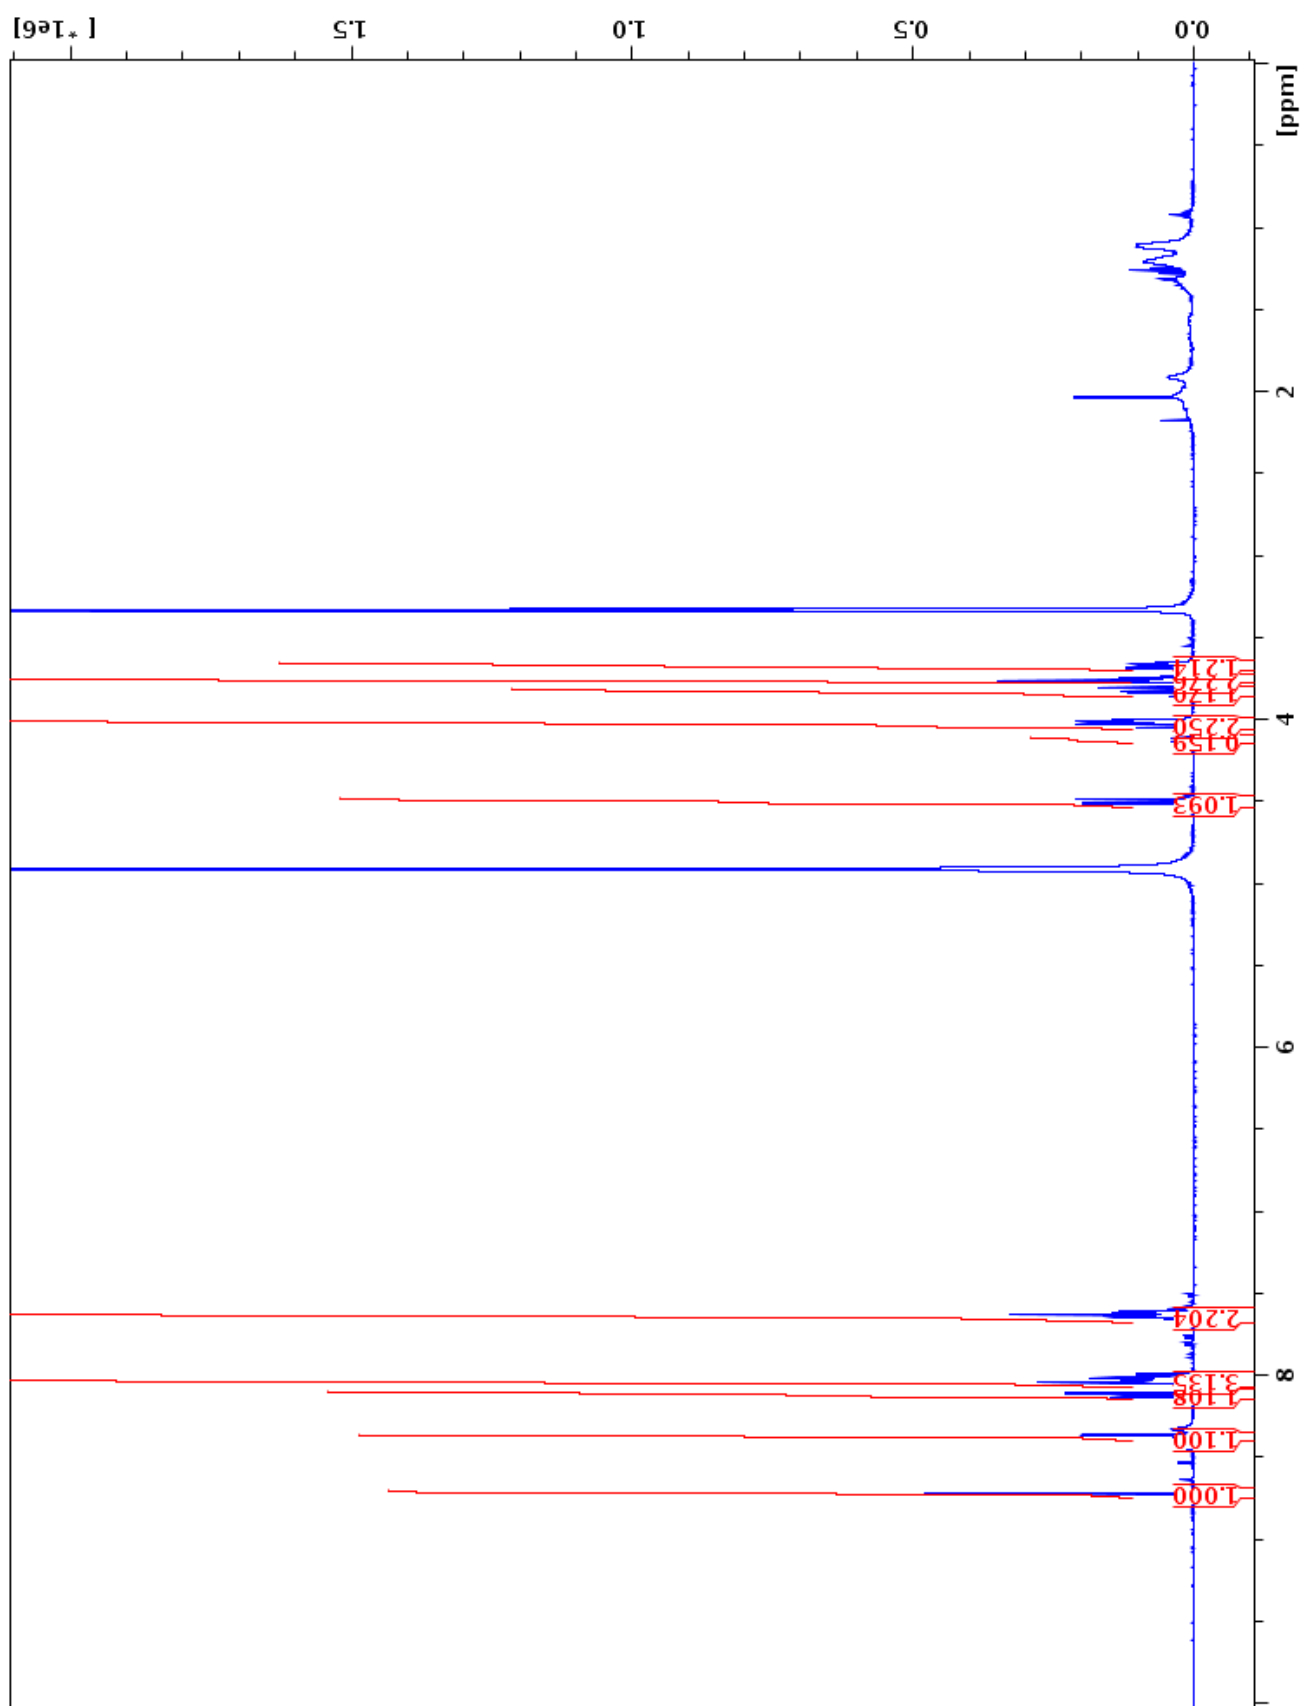

**1c:** 1-(naphth-2-yl)-4-(1-deoxy- $\beta$ -D-galactopyranosyl)triazole

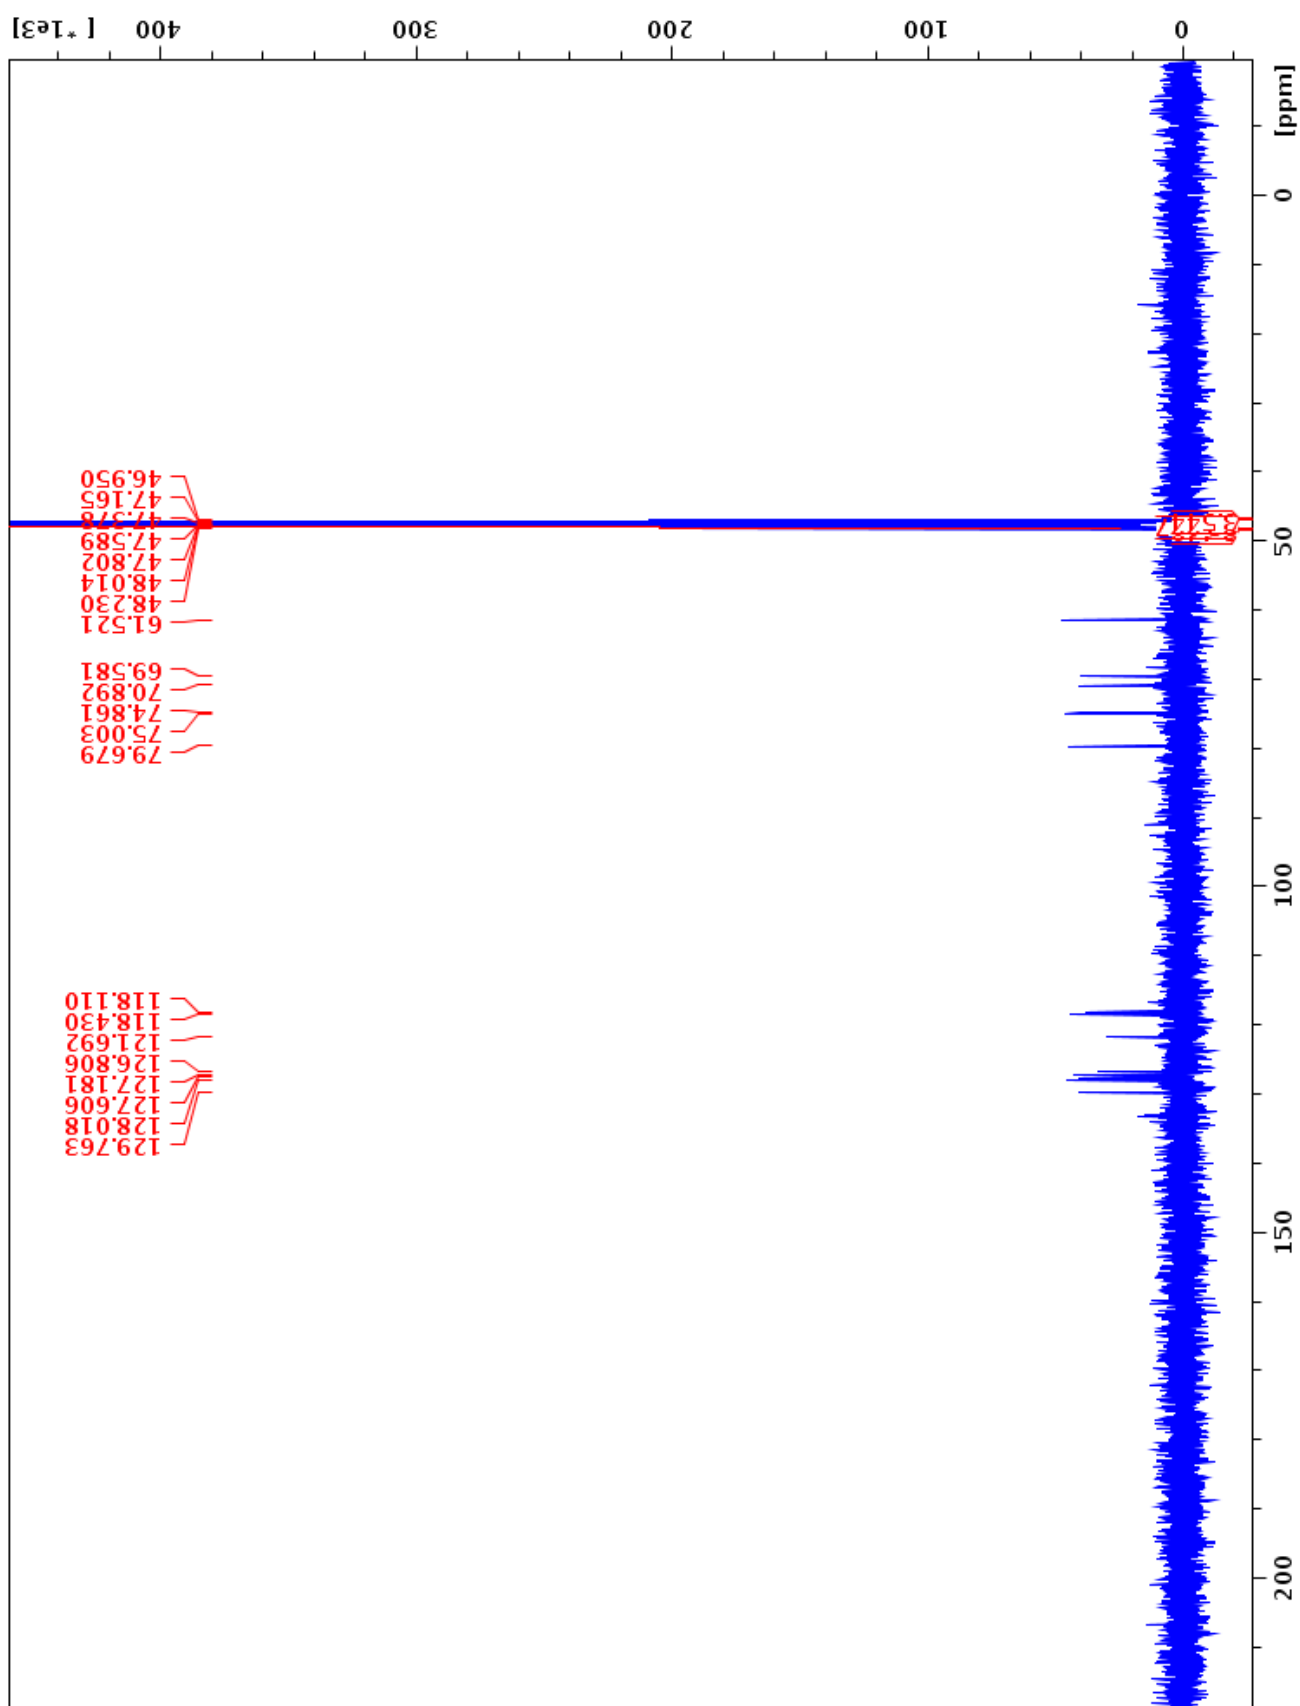

**1d:** 1-(4-chlorophenyl)-4-(1-deoxy- $\beta$ -D-galactopyranosyl)triazole

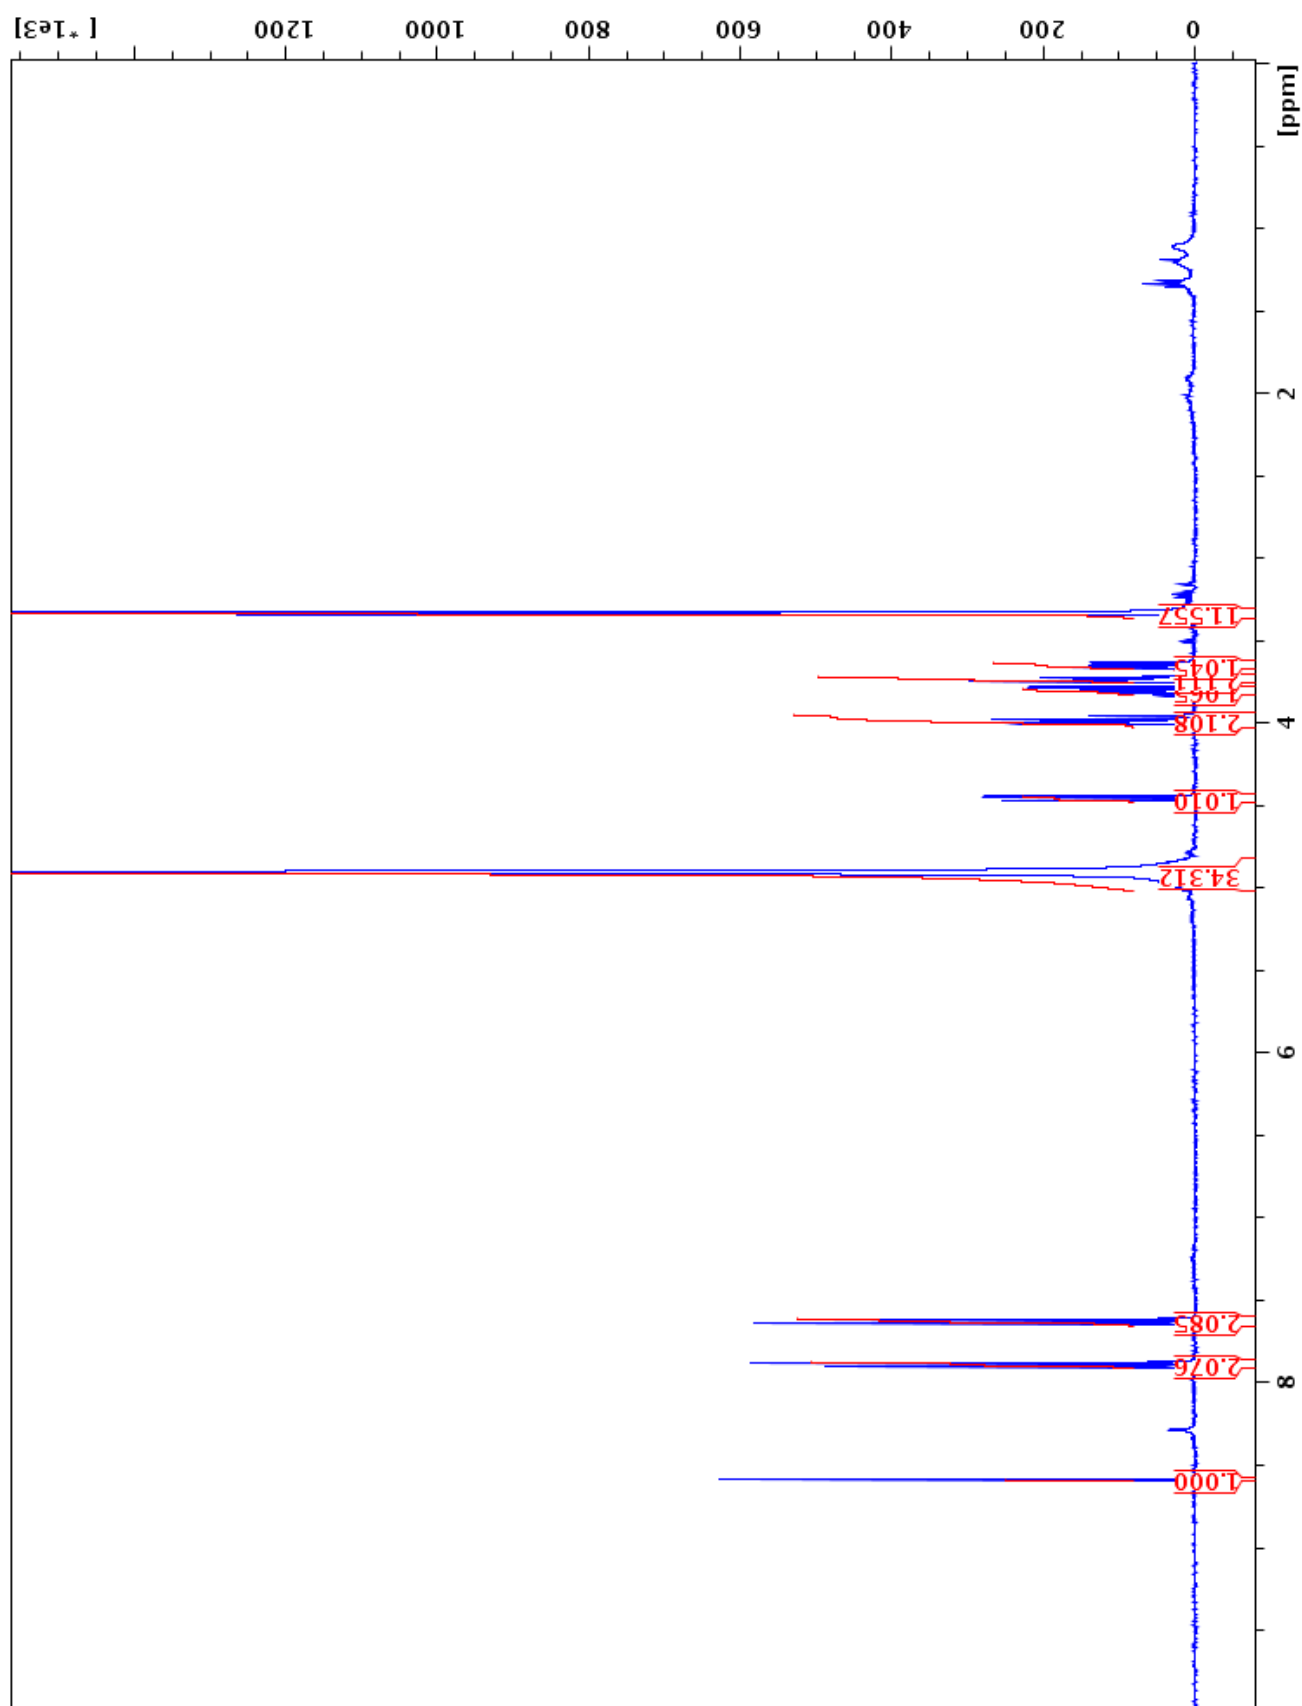

**1d:** 1-(4-chlorophenyl)-4-(1-deoxy- $\beta$ -D-galactopyranosyl)triazole

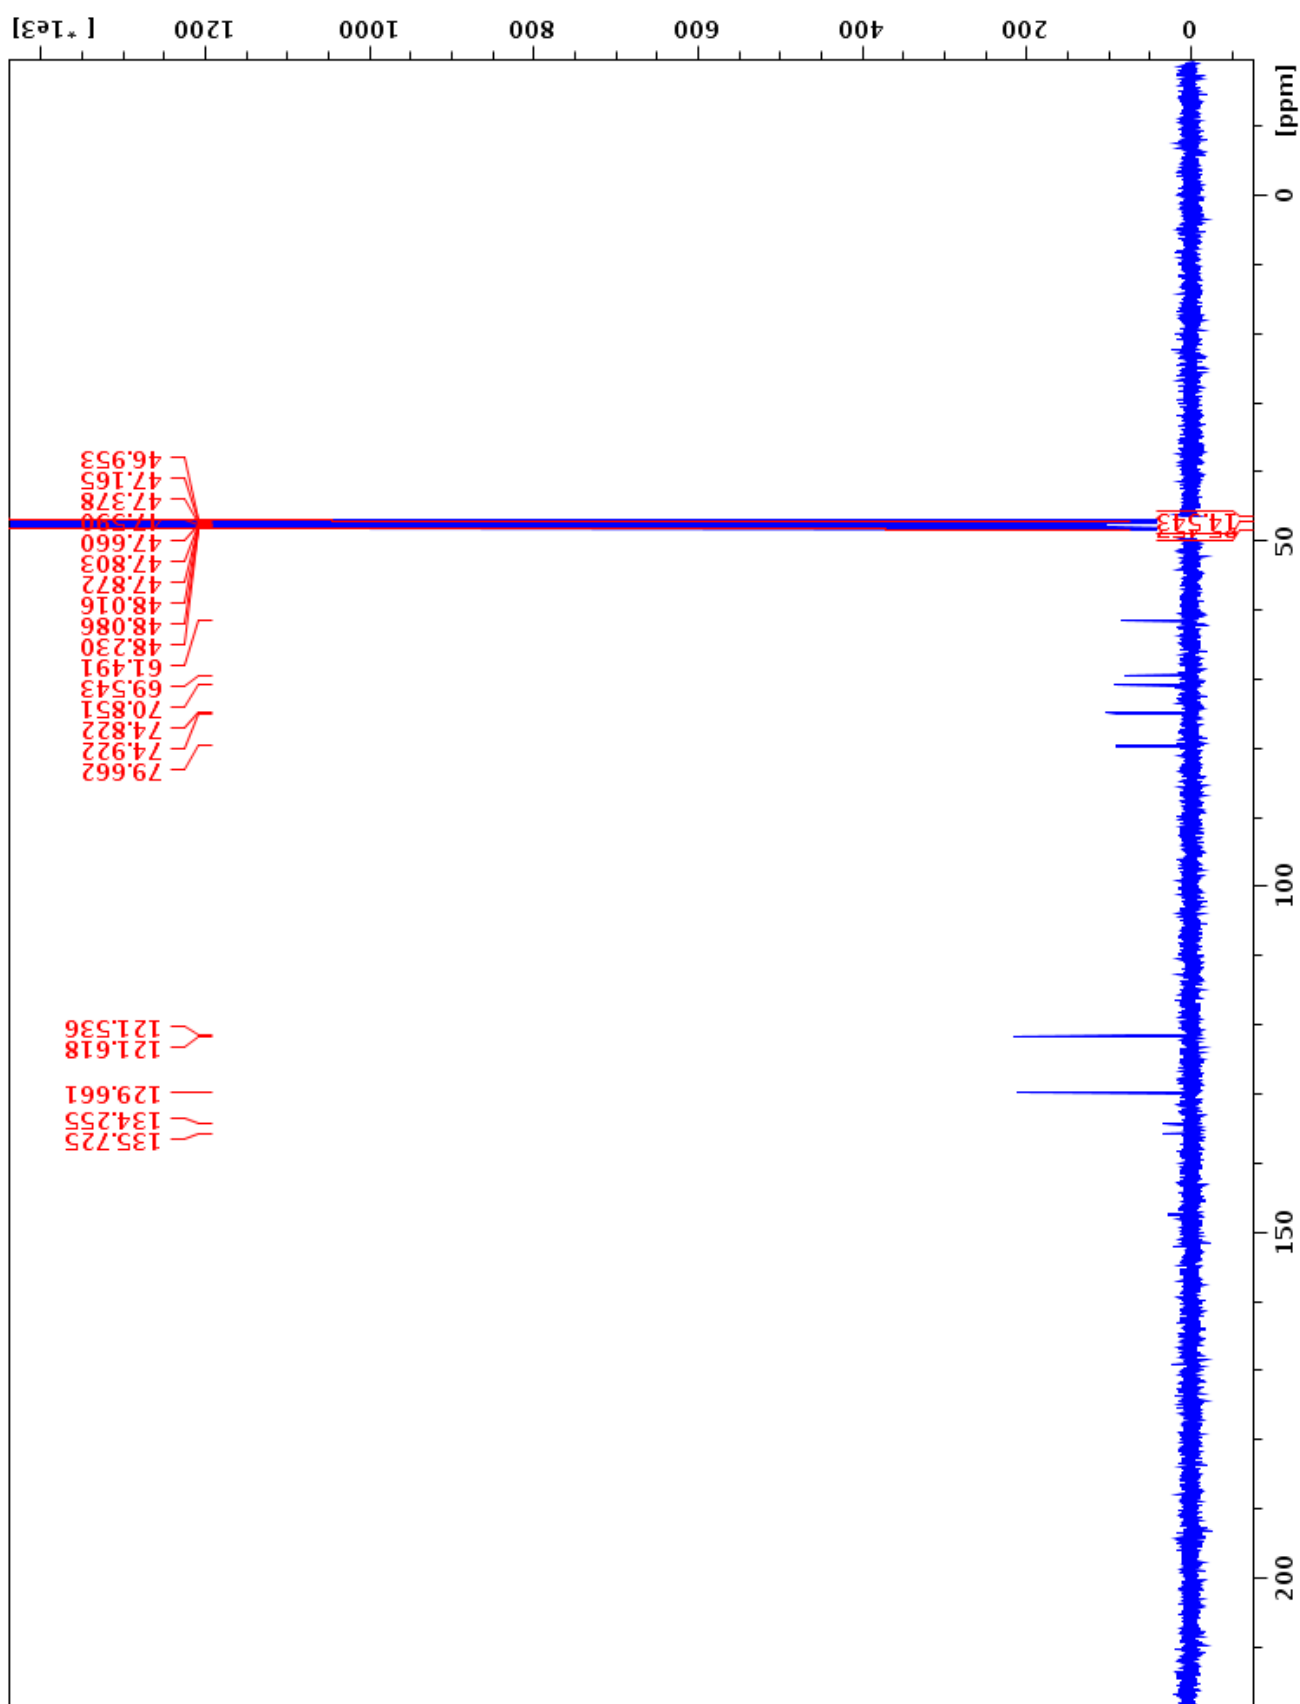

**1e:** 1-(3-chlorophenyl)-4-(1-deoxy- $\beta$ -D-galactopyranosyl)triazole

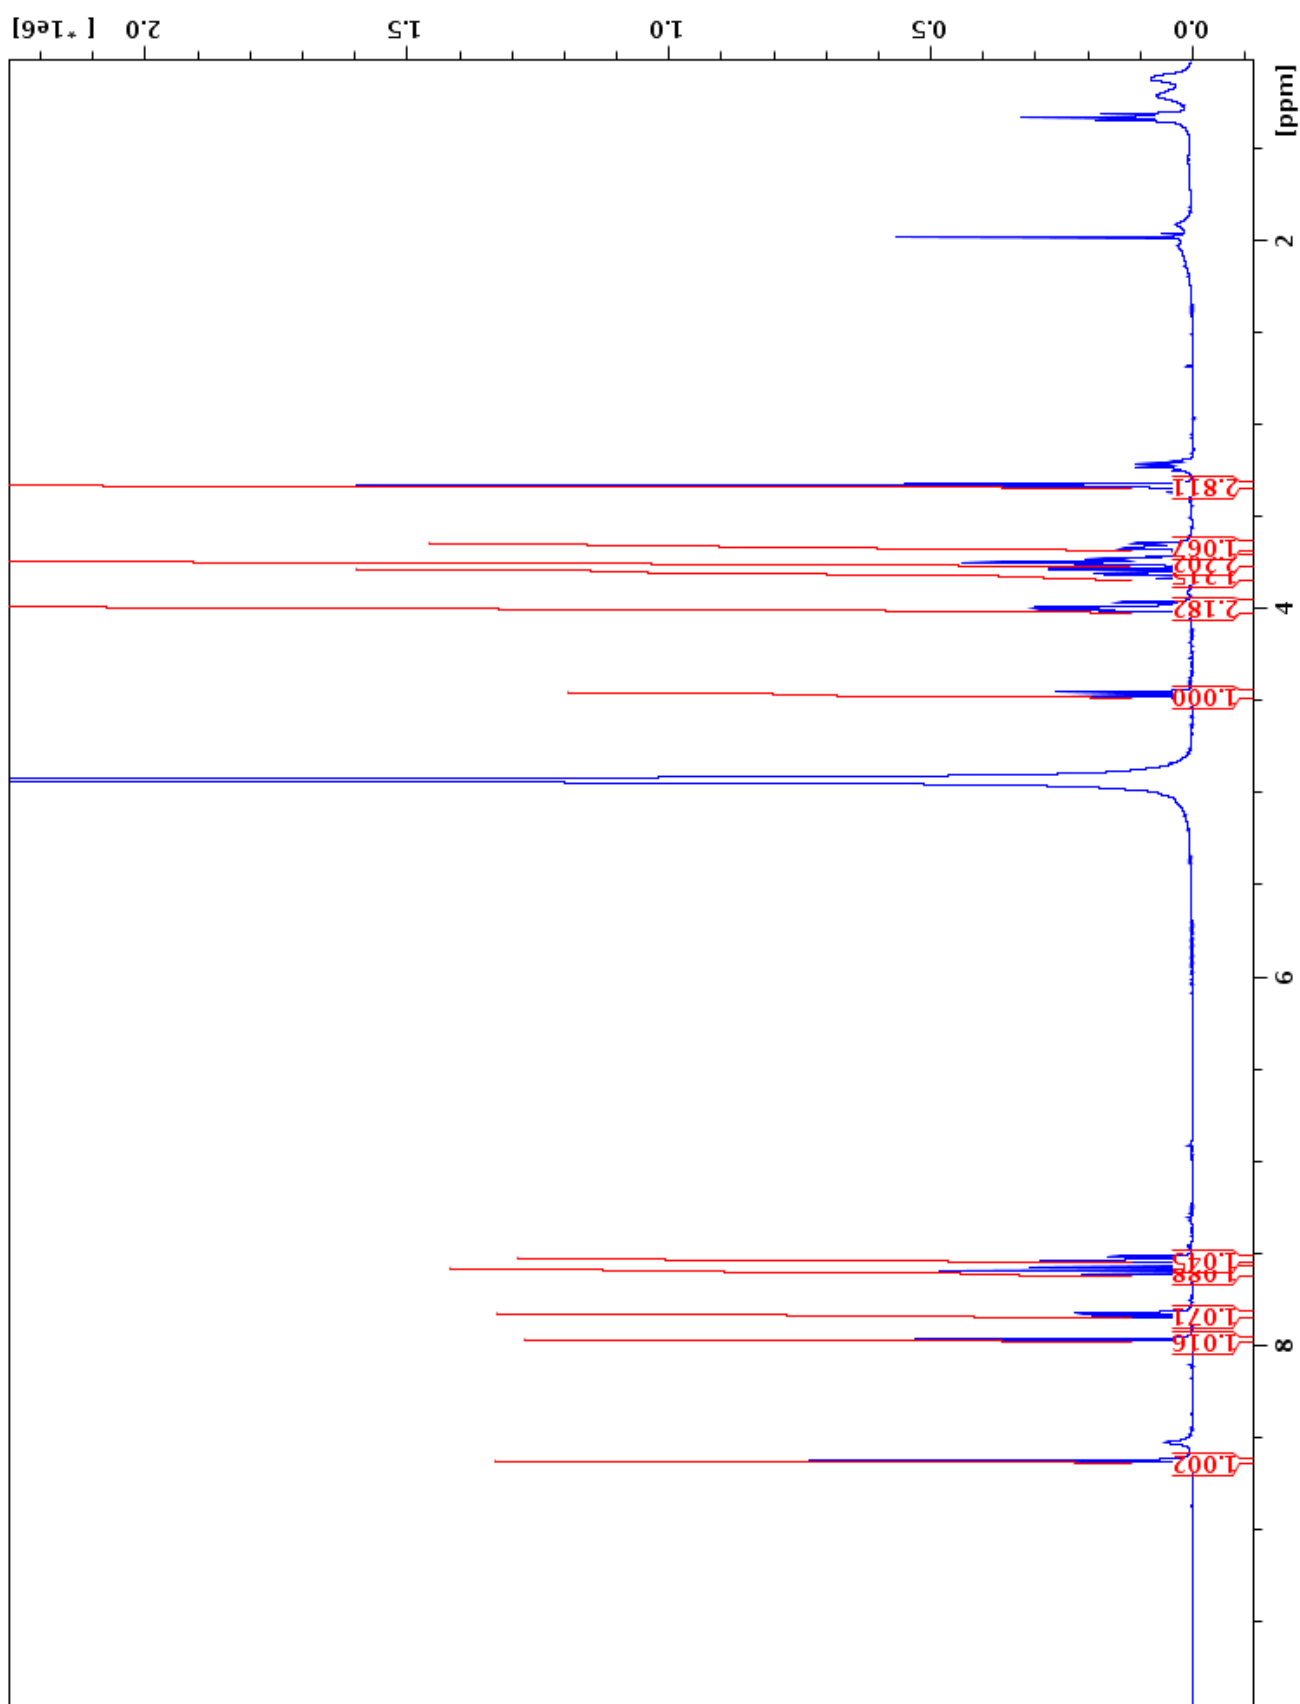

**1e:** 1-(3-chlorophenyl)-4-(1-deoxy- $\beta$ -D-galactopyranosyl)triazole

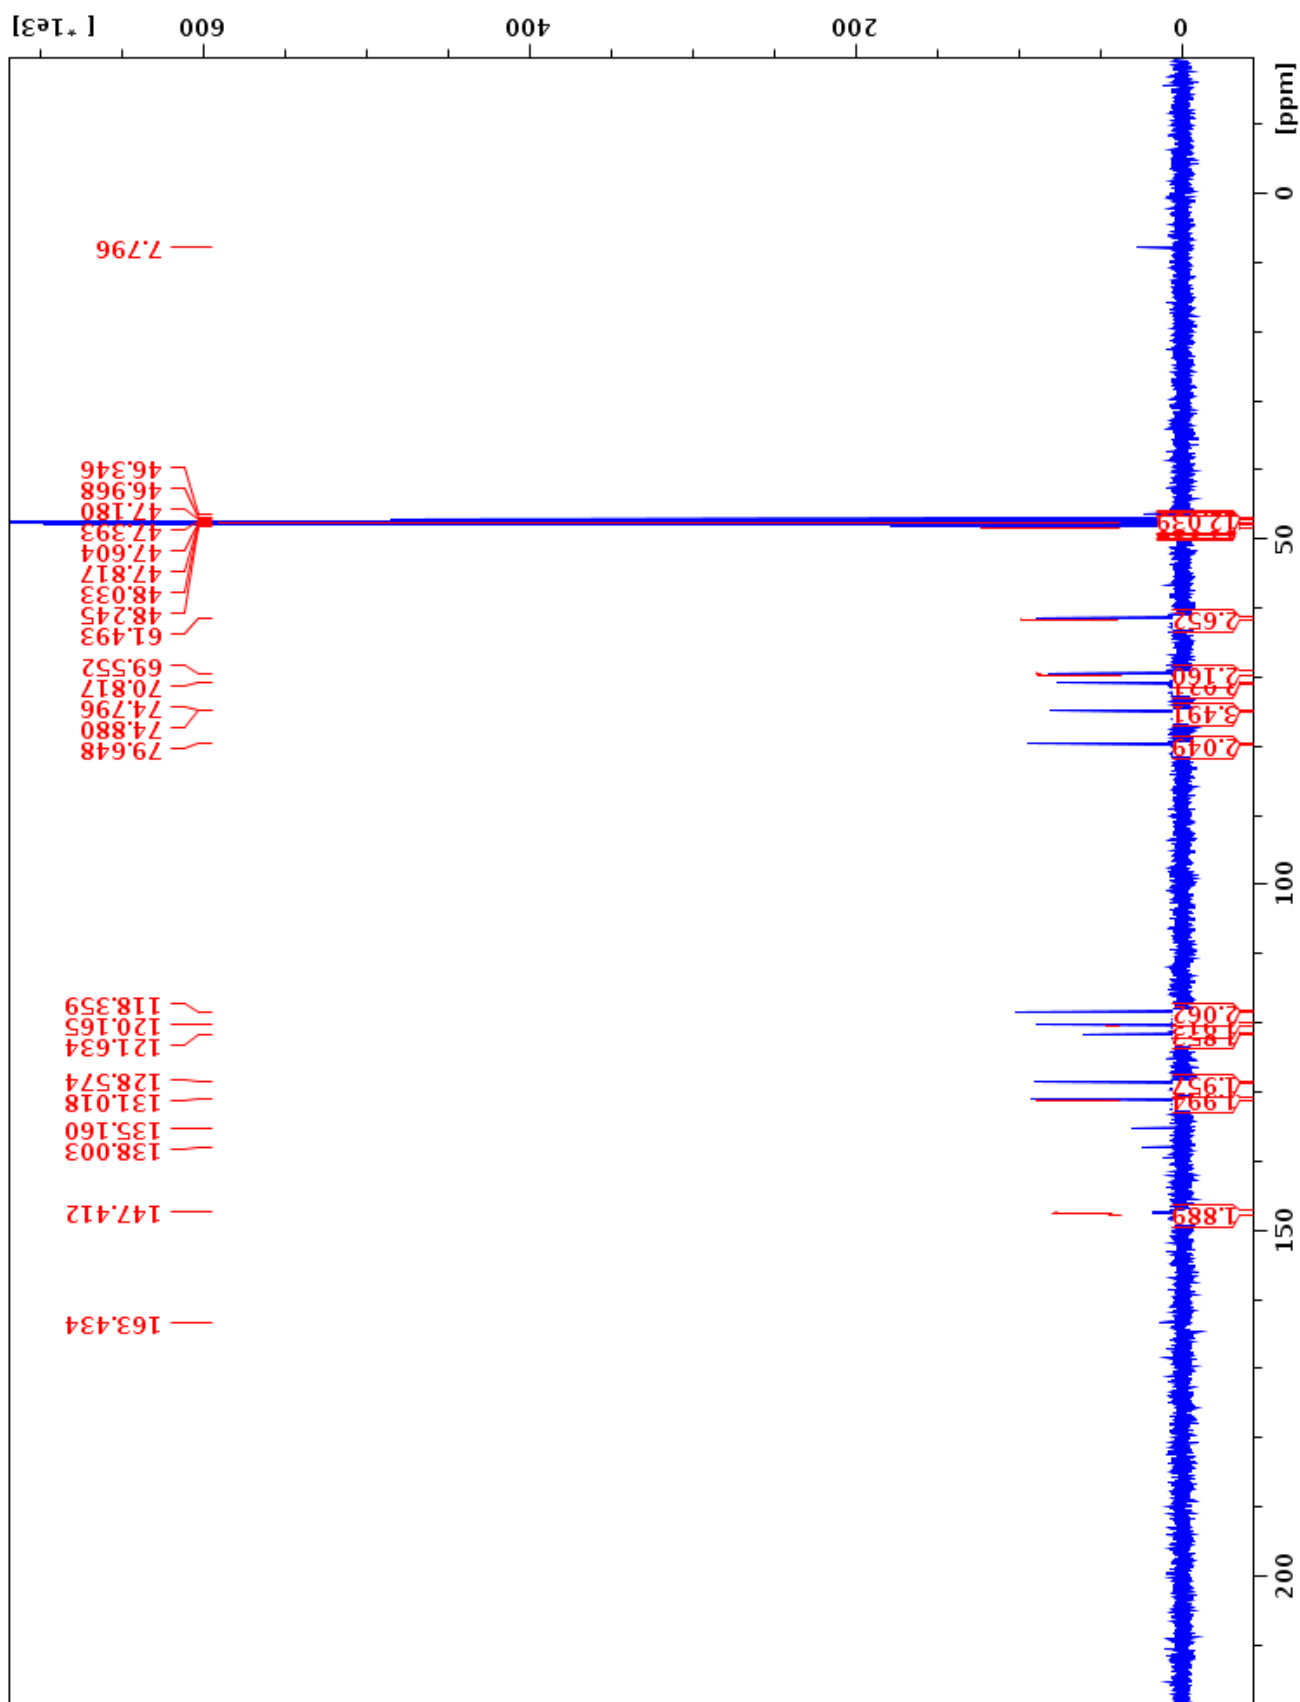

**1f:** 1-(4-methylphenyl)-4-(1-deoxy- $\beta$ -D-galactopyranosyl)triazole

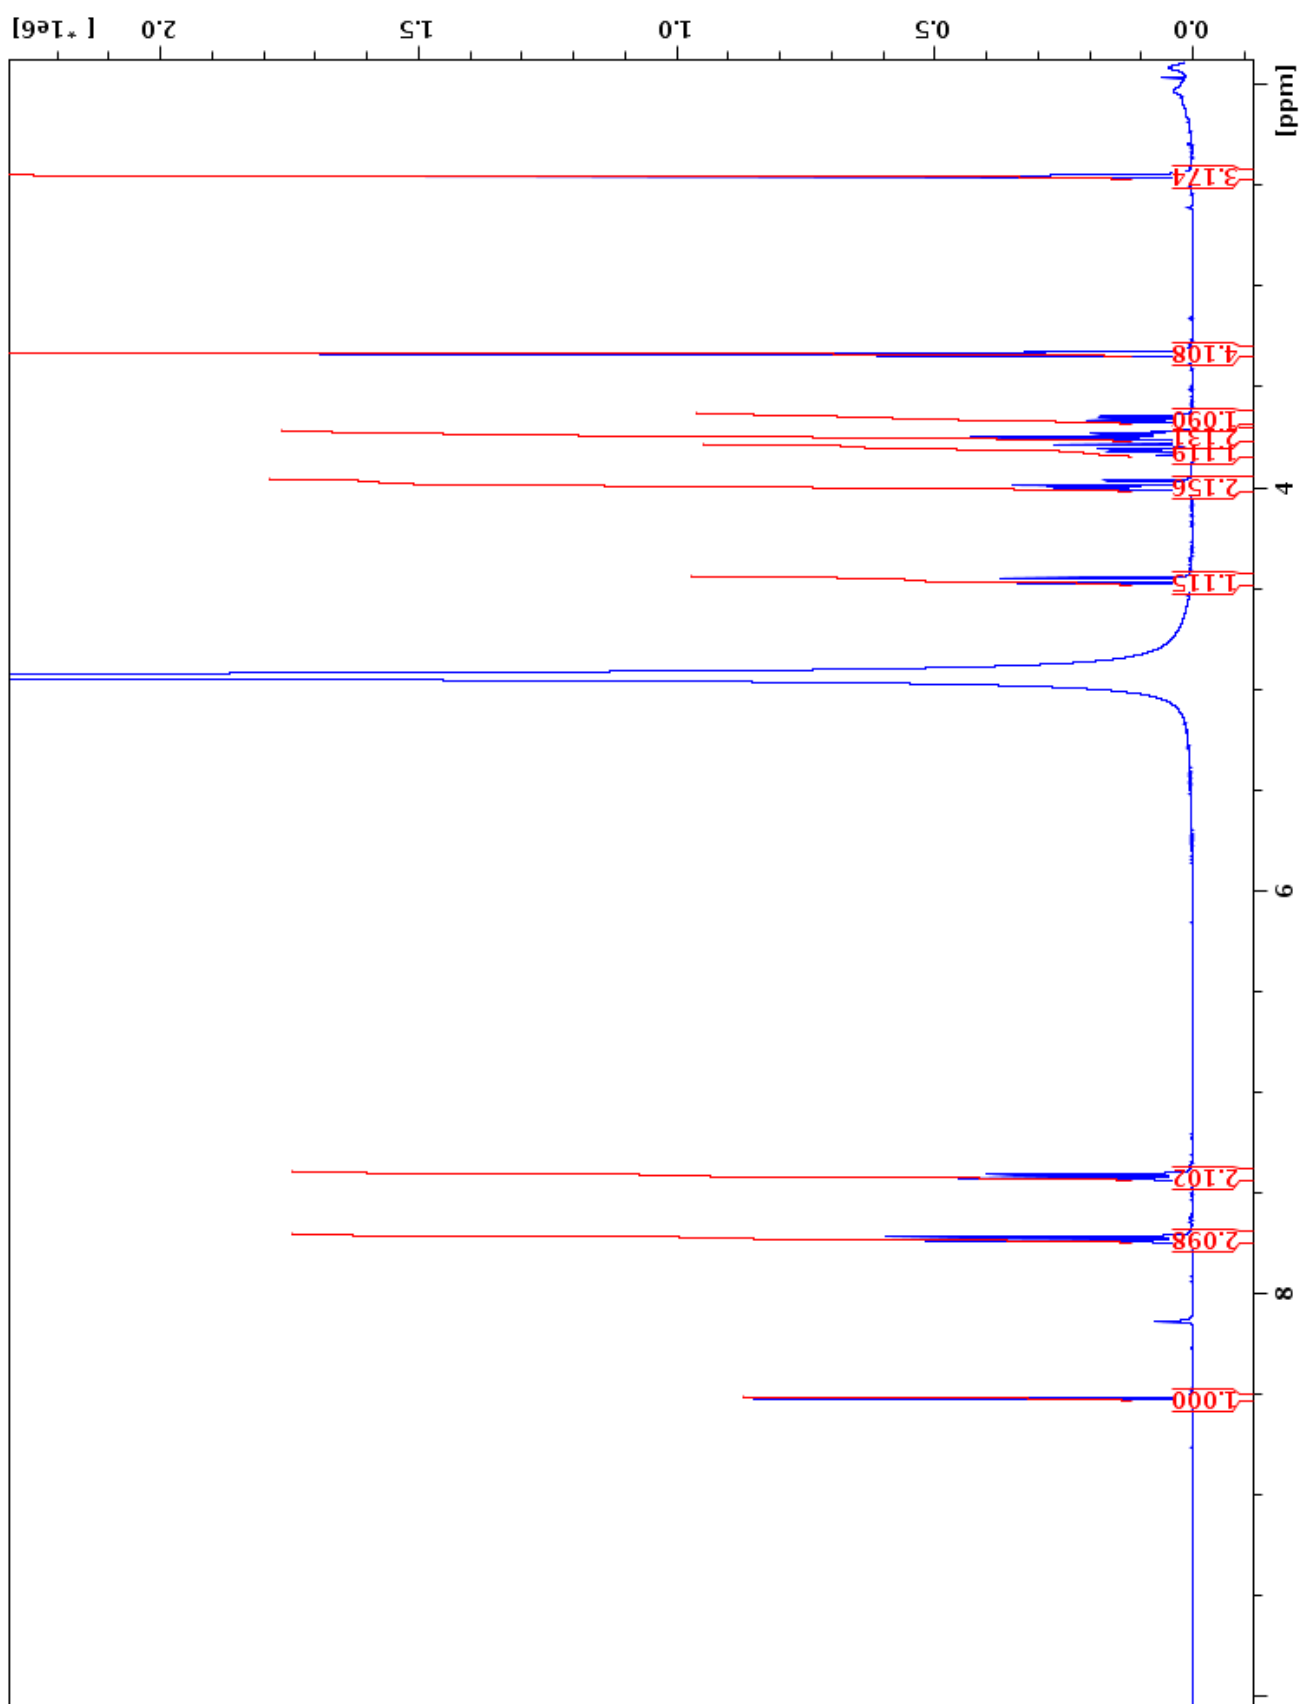

**1f:** 1-(4-methylphenyl)-4-(1-deoxy- $\beta$ -D-galactopyranosyl)triazole

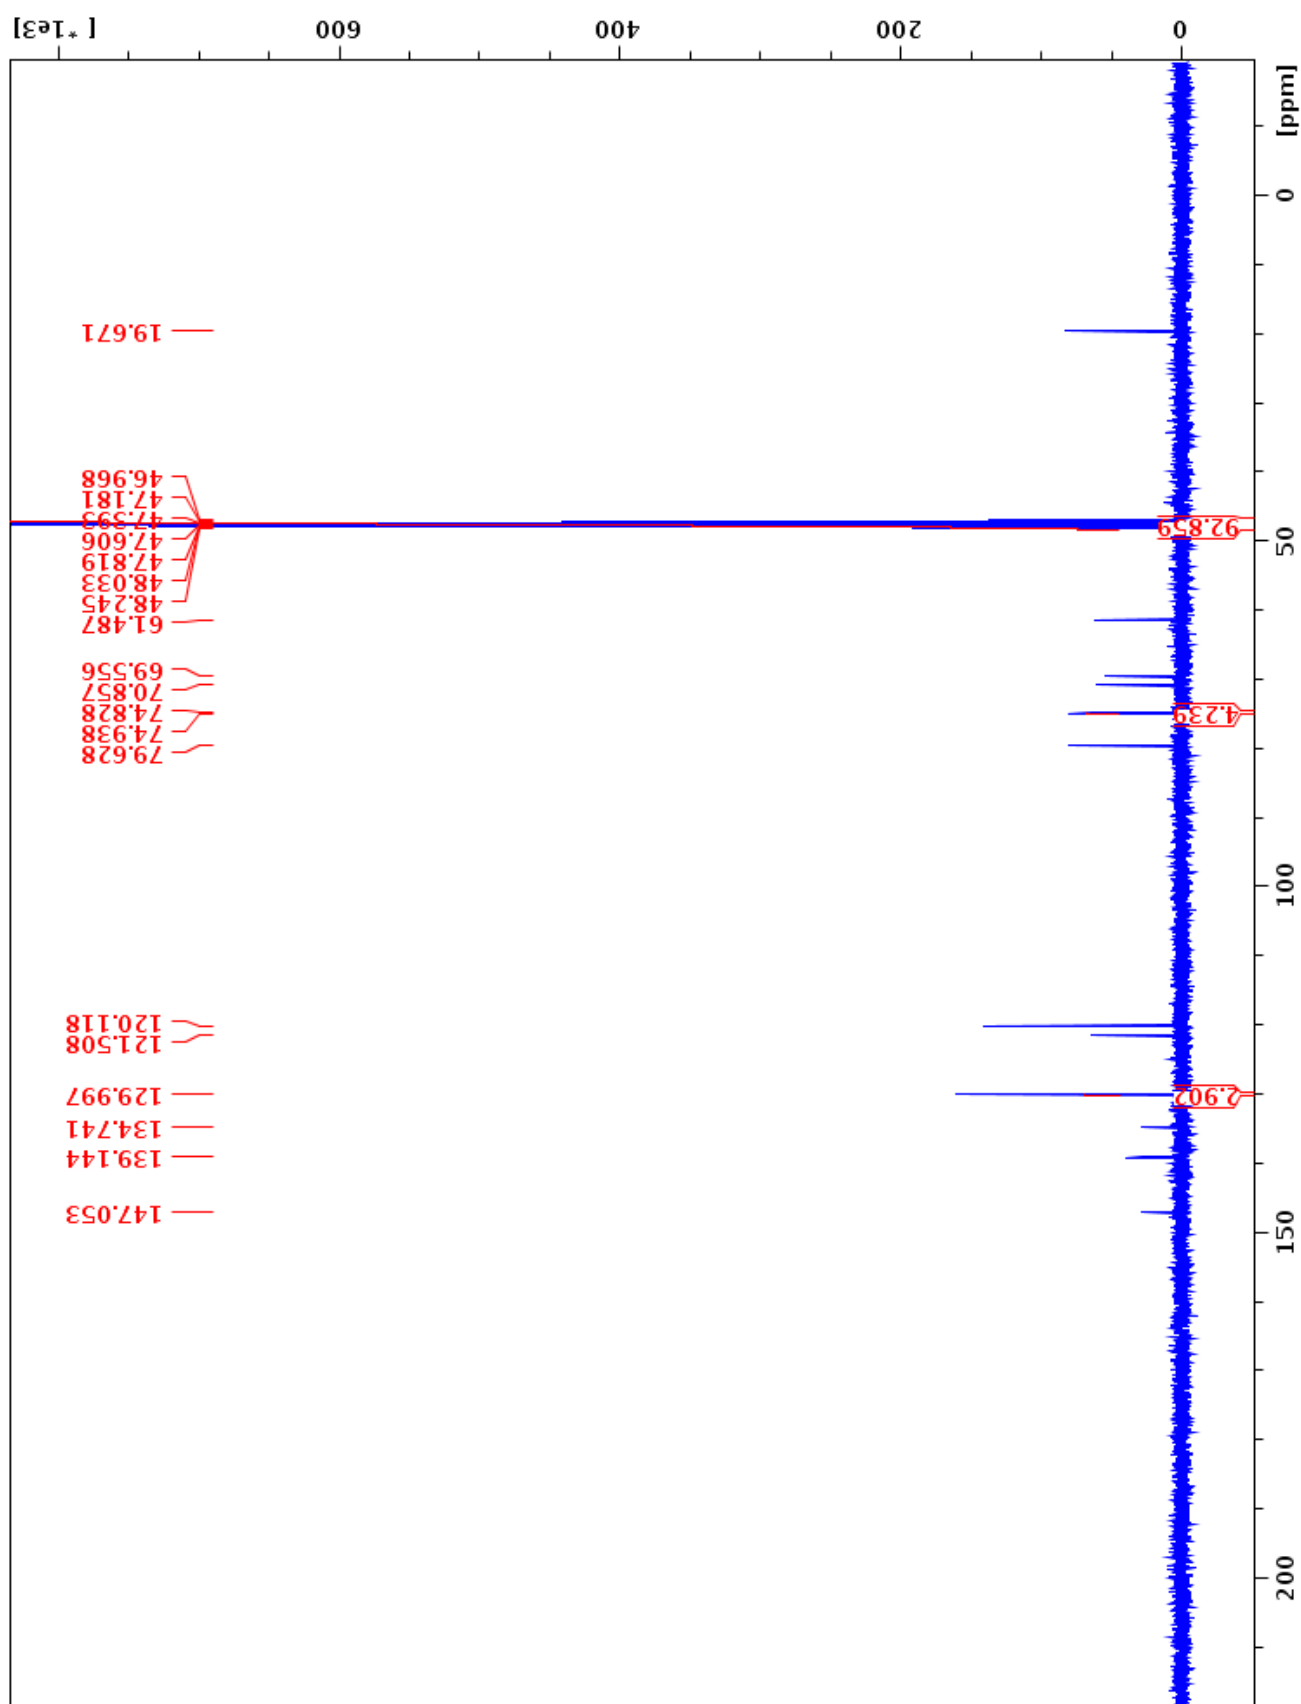



**1g:** 1-(3-methylphenyl)-4-(1-deoxy- $\beta$ -D-galactopyranosyl)triazole

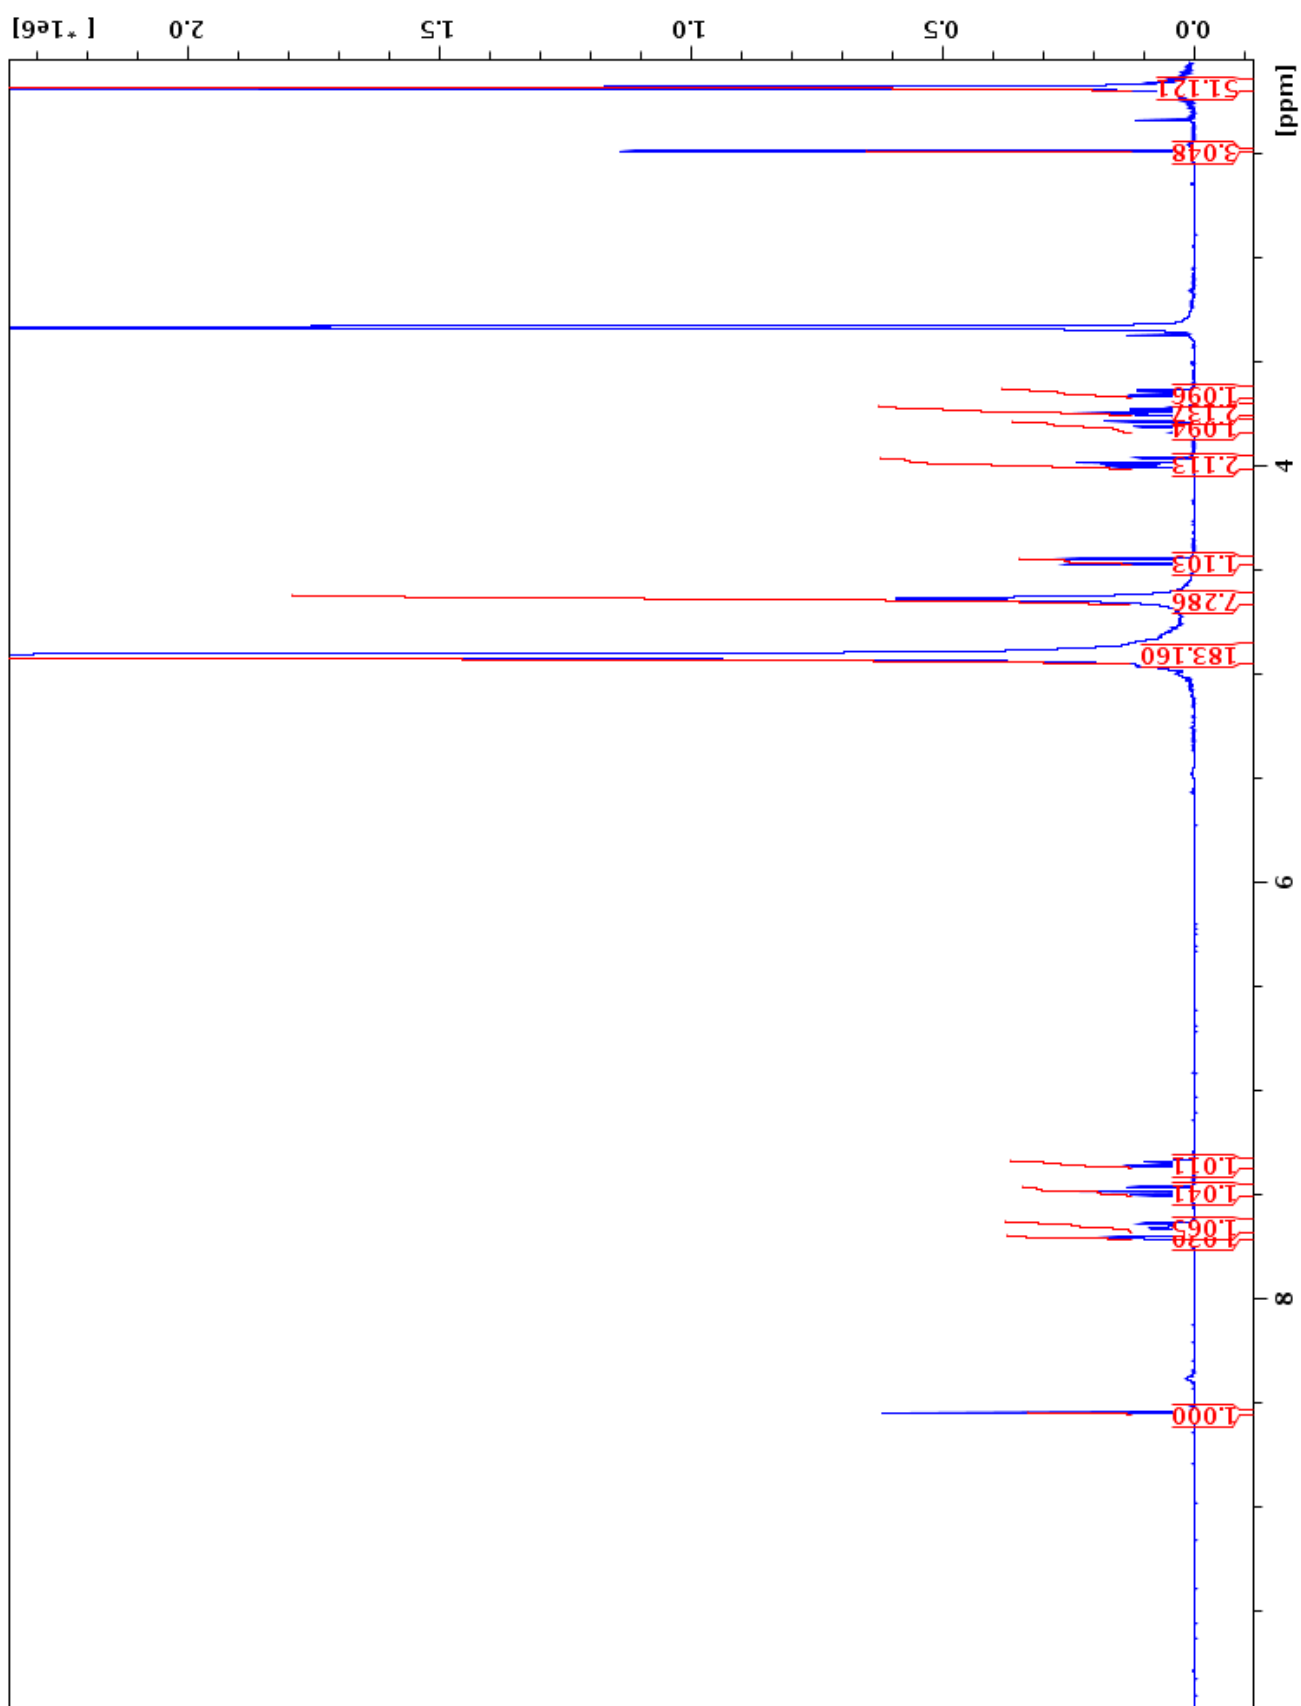

**1g:** 1-(3-methylphenyl)-4-(1-deoxy- $\beta$ -D-galactopyranosyl)oxazole

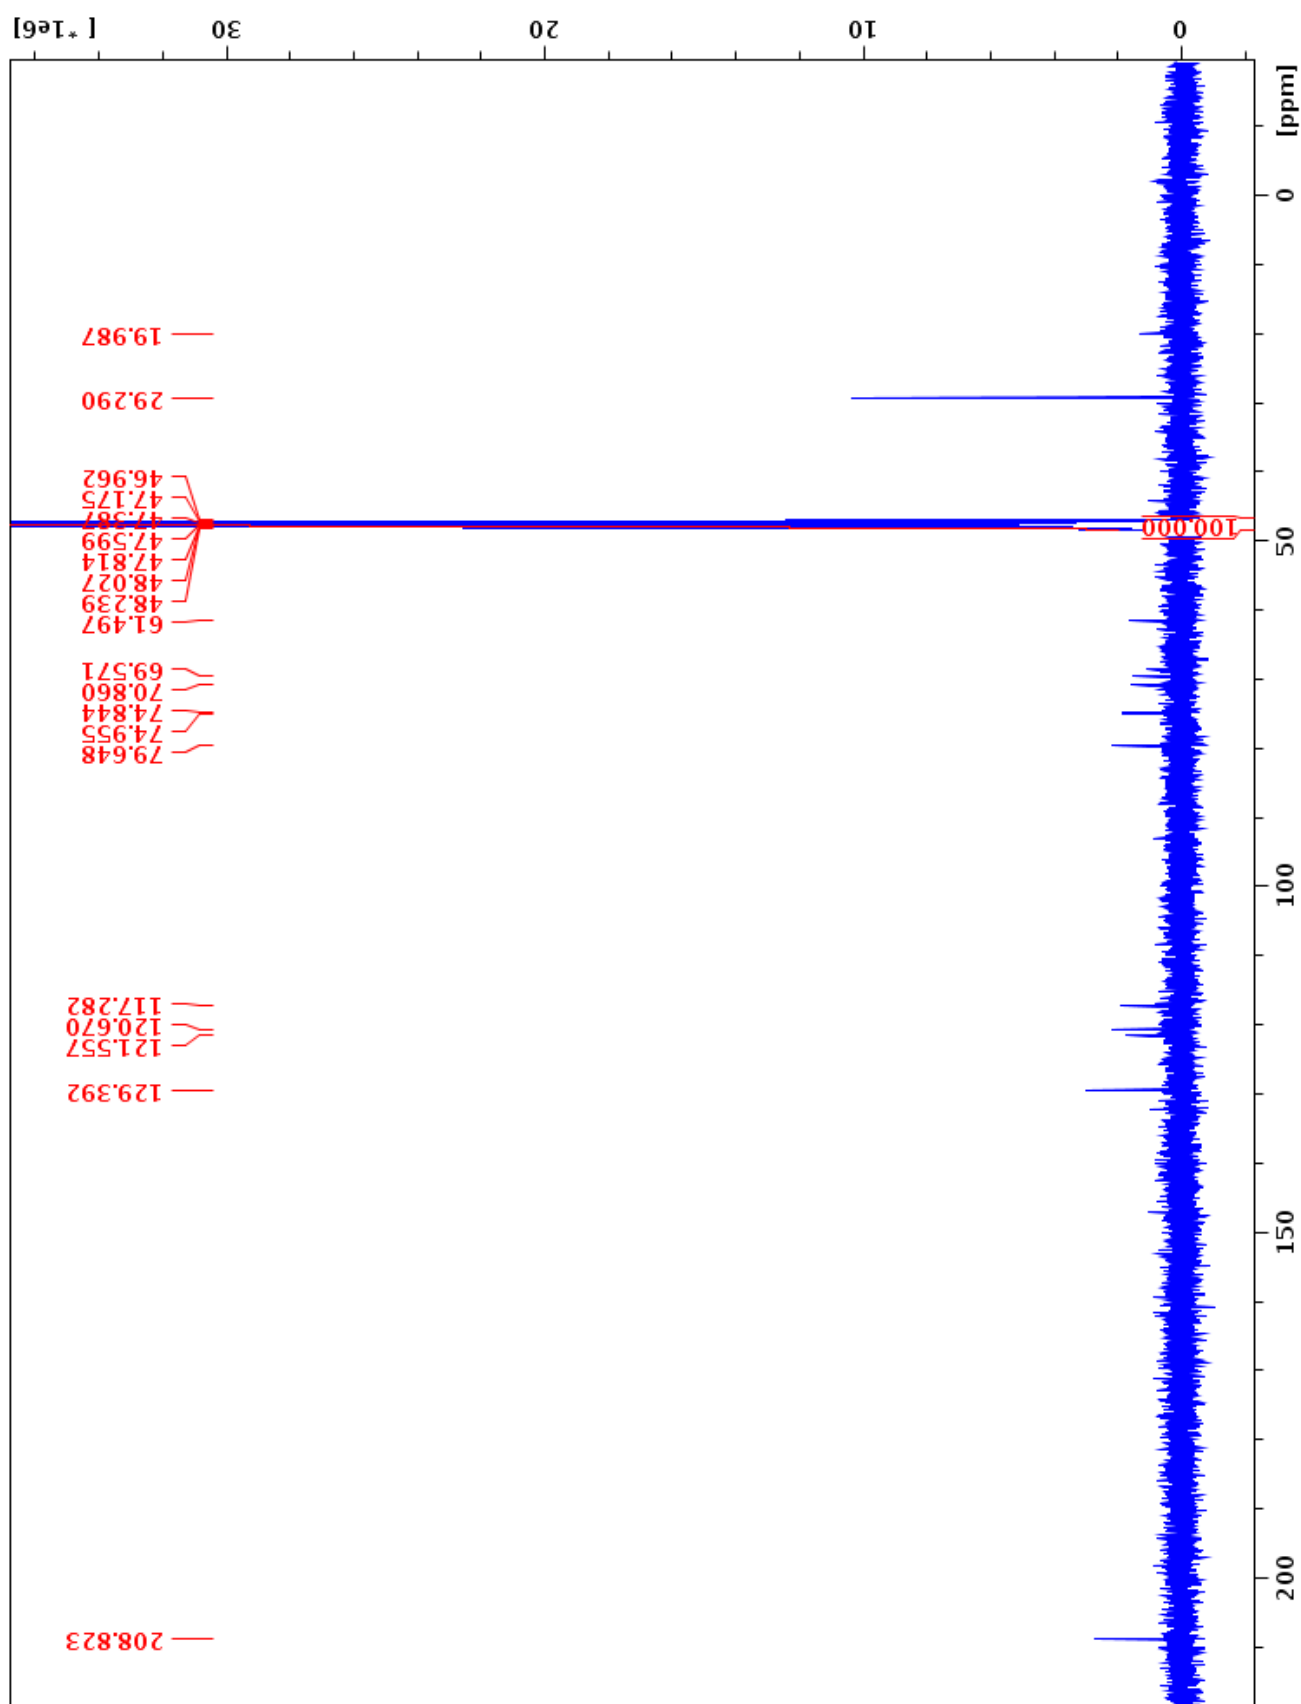

**1h:** 1-(4-fluorophenyl)-4-(1-deoxy- $\beta$ -D-galactopyranosyl)triazole

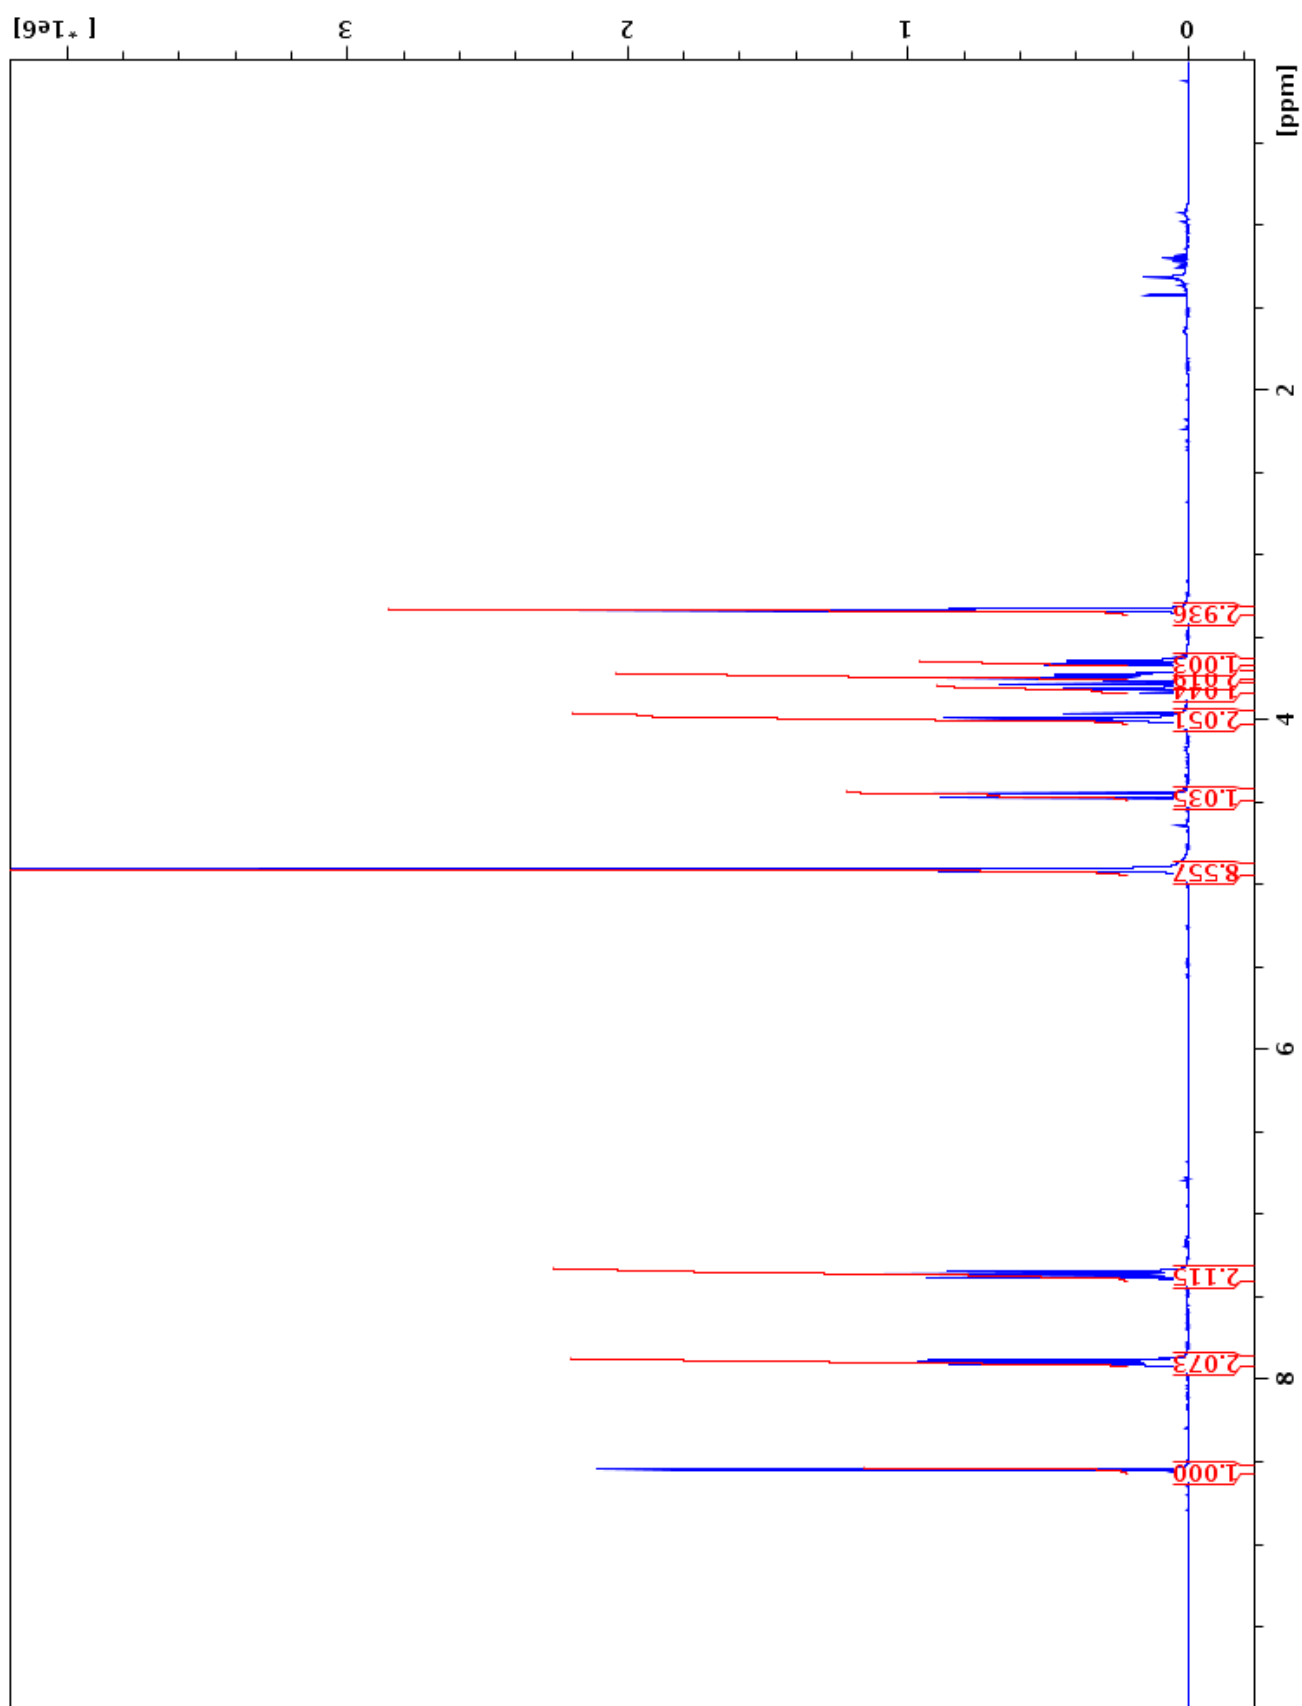

**1h:** 1-(4-fluorophenyl)-4-(1-deoxy- $\beta$ -D-galactopyranosyl)triazole

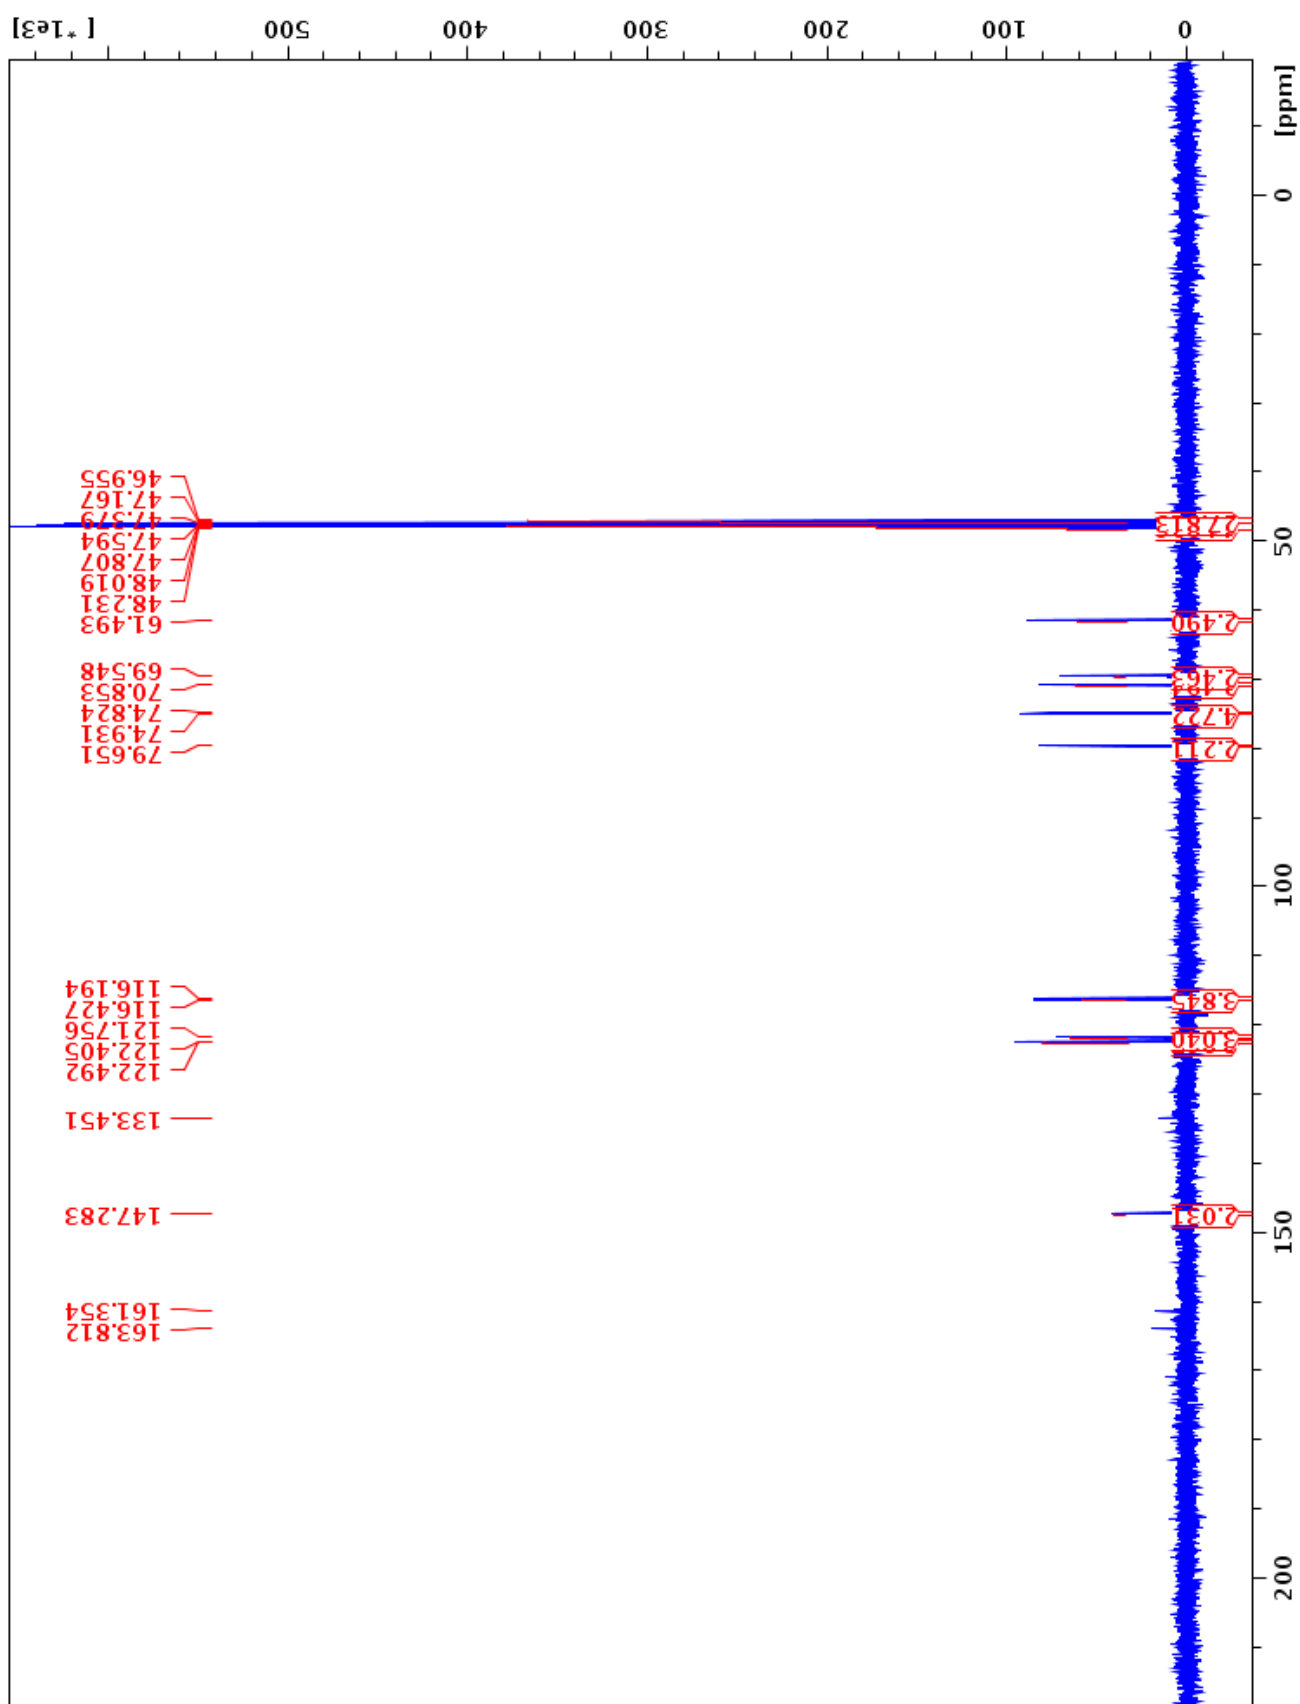

**1i:** 1-(3-fluorophenyl)-4-(1-deoxy- $\beta$ -D-galactopyranosyl)triazole

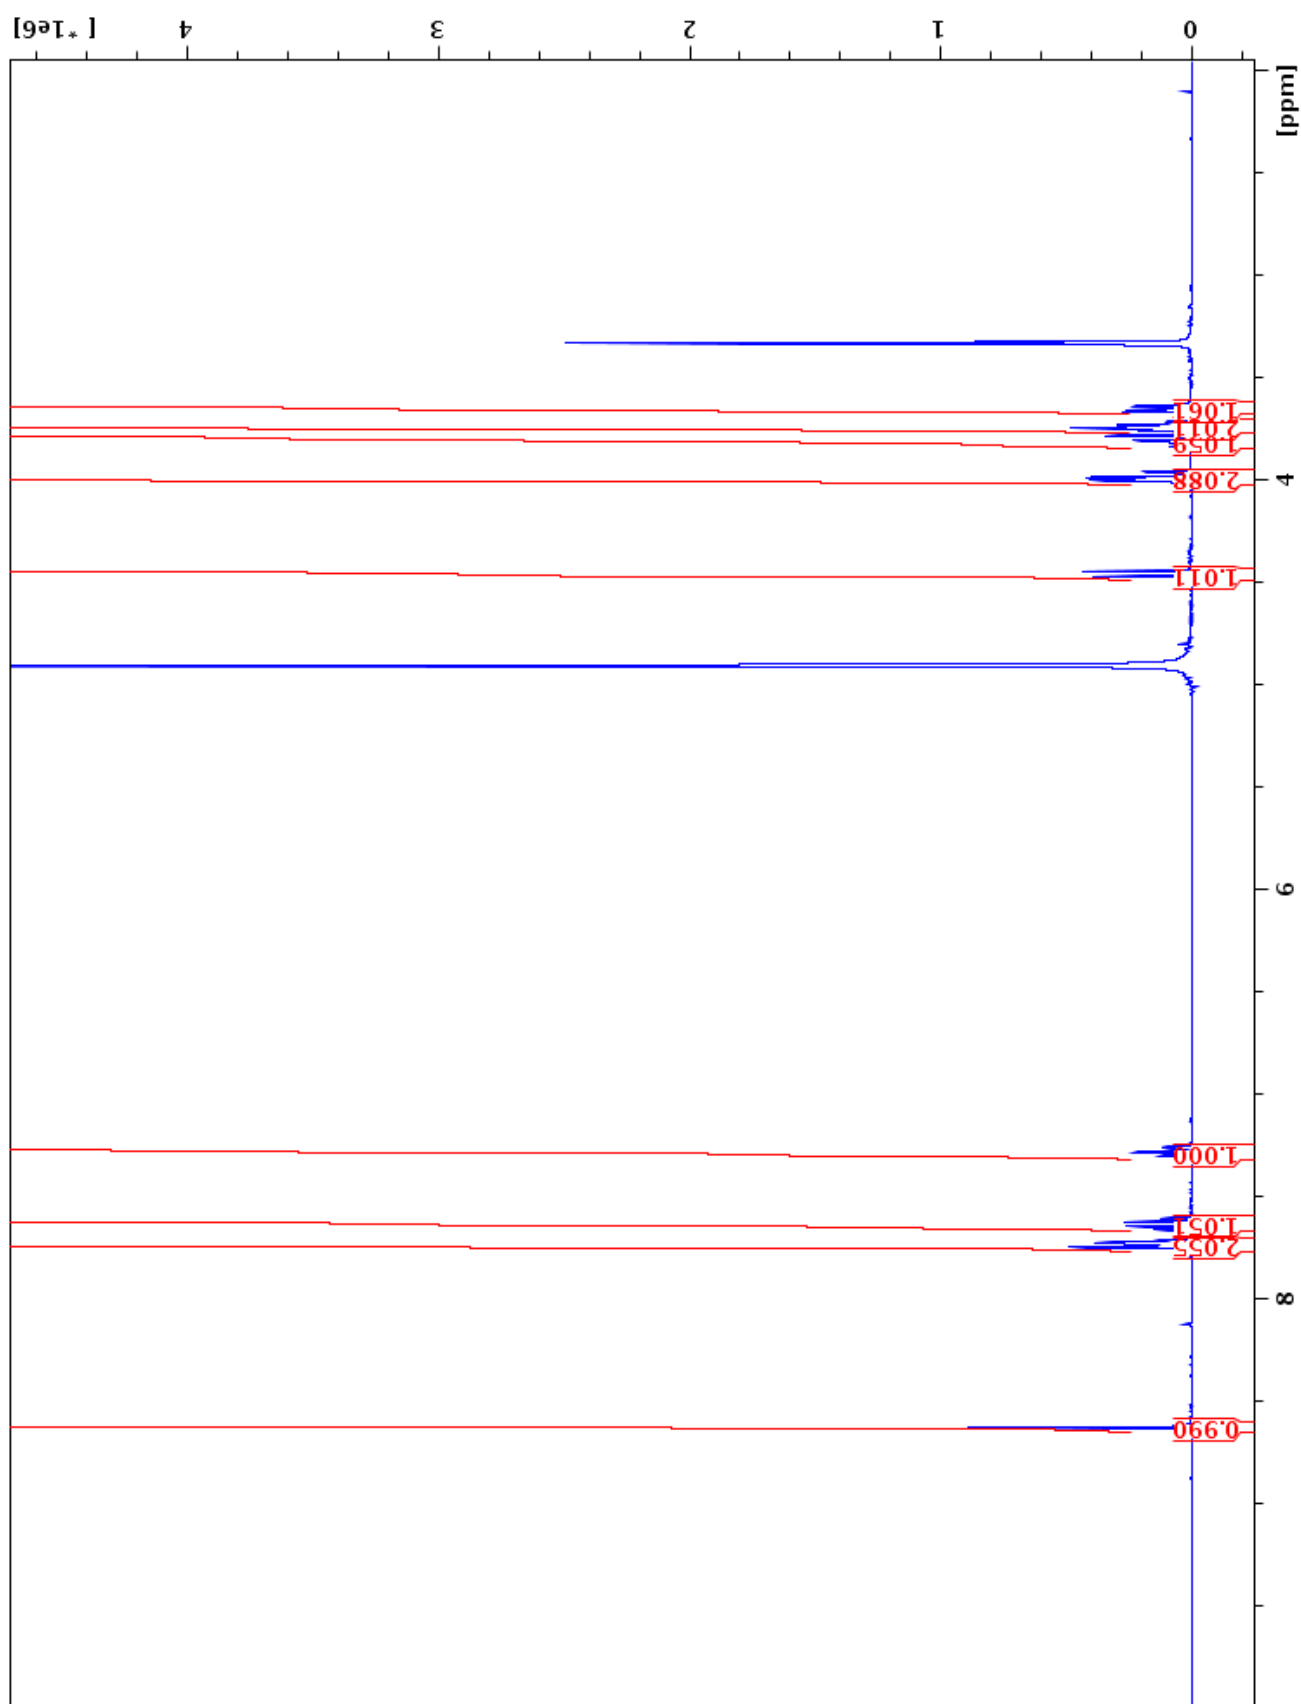

**1i:** 1-(3-fluorophenyl)-4-(1-deoxy- $\beta$ -D-galactopyranosyl)triazole

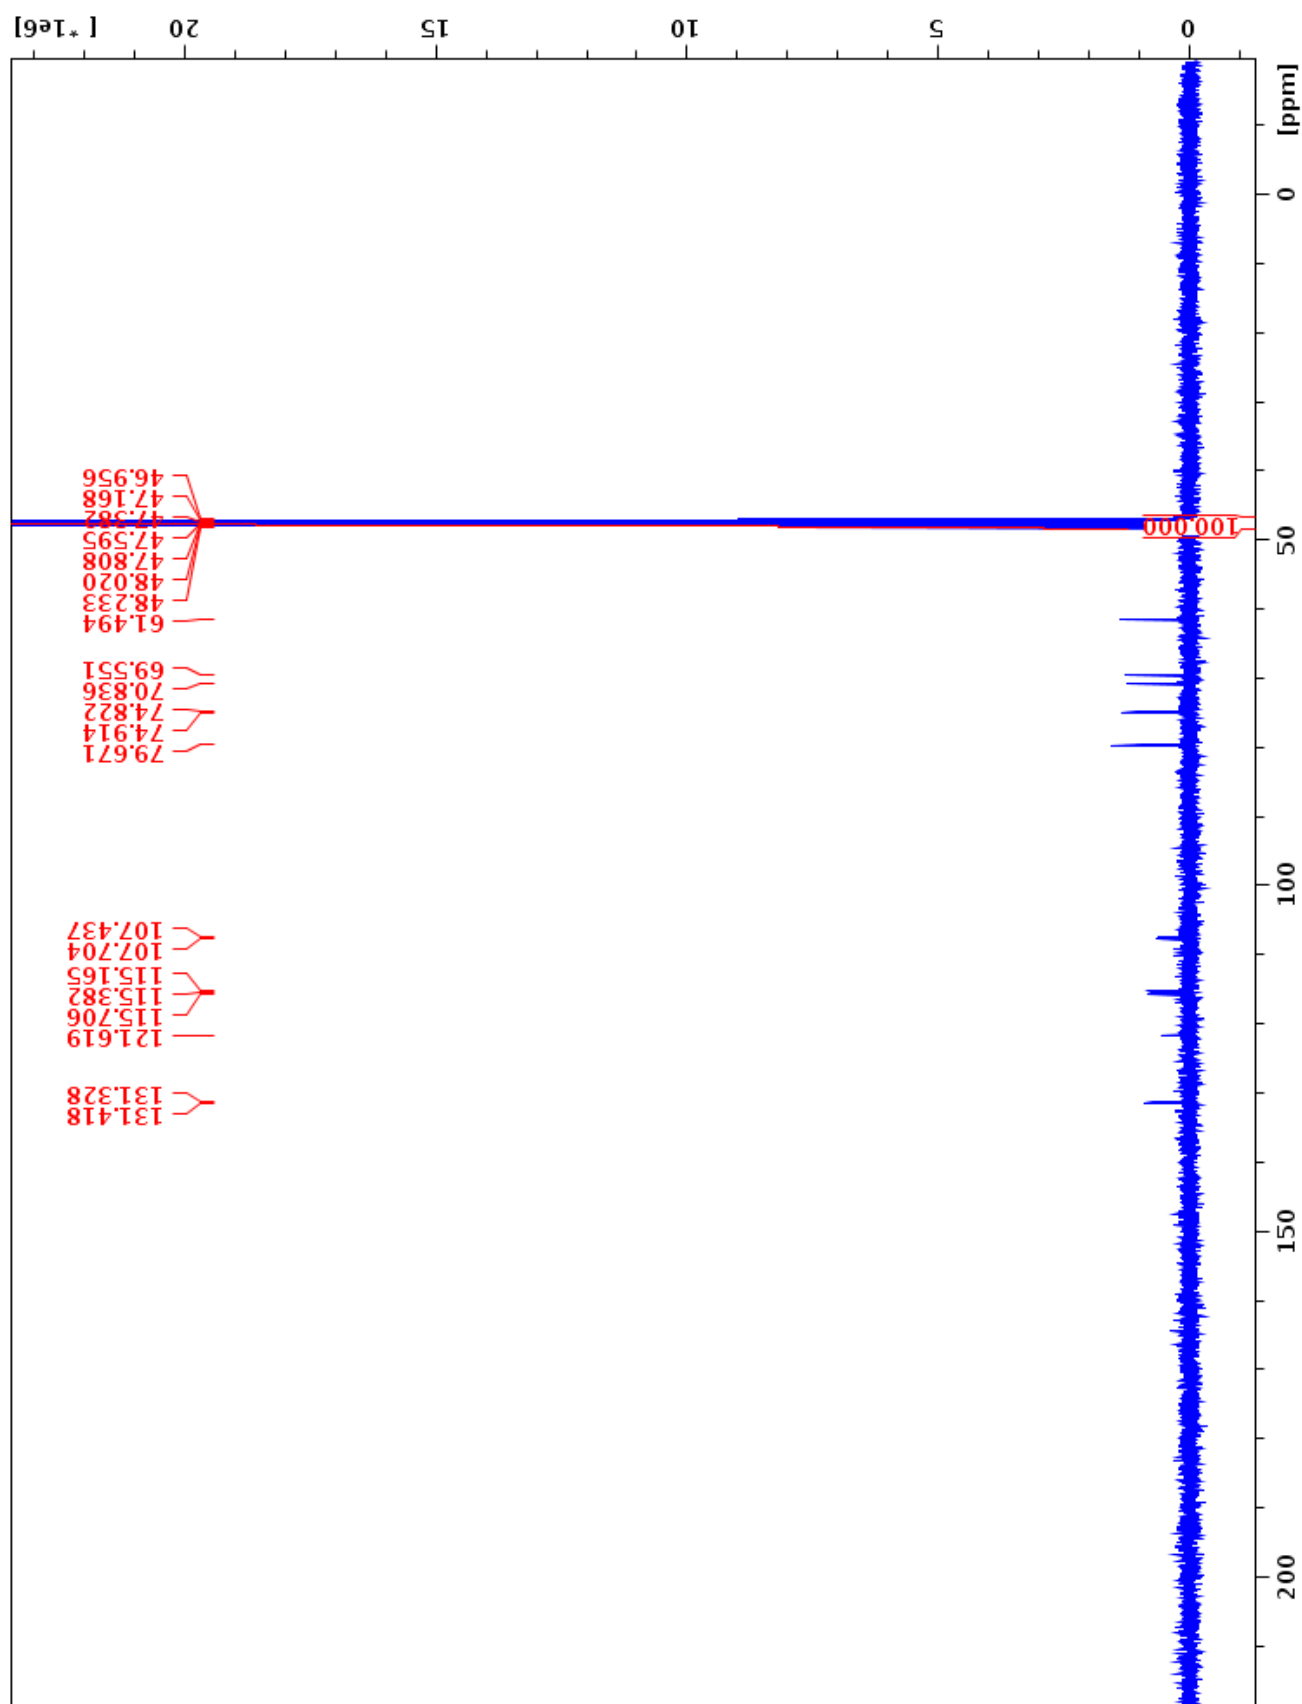

**1j:** 1-(2-fluorophenyl)-4-(1-deoxy- $\beta$ -D-galactopyranosyl)triazole

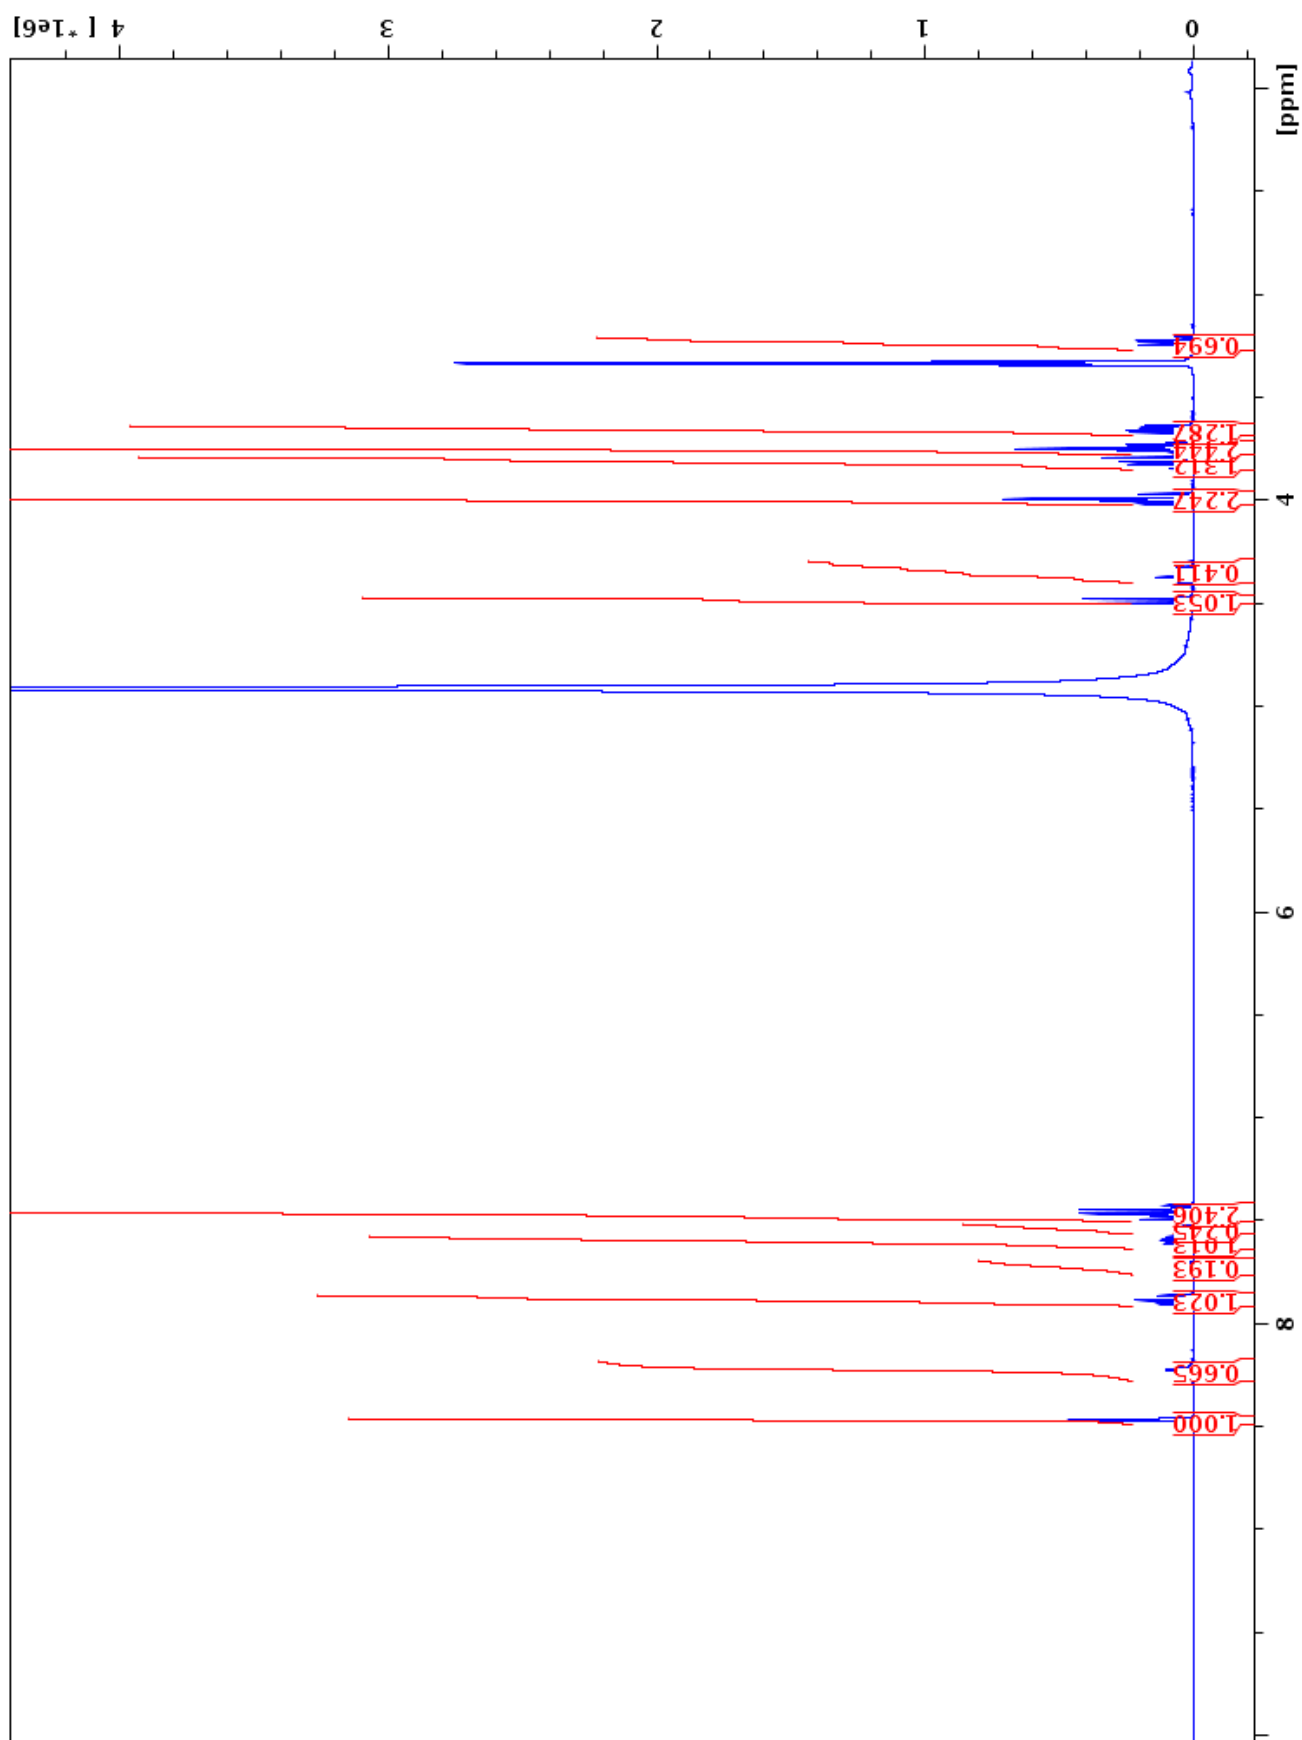

**1j:** 1-(2-fluorophenyl)-4-(1-deoxy- $\beta$ -D-galactopyranosyl)triazole

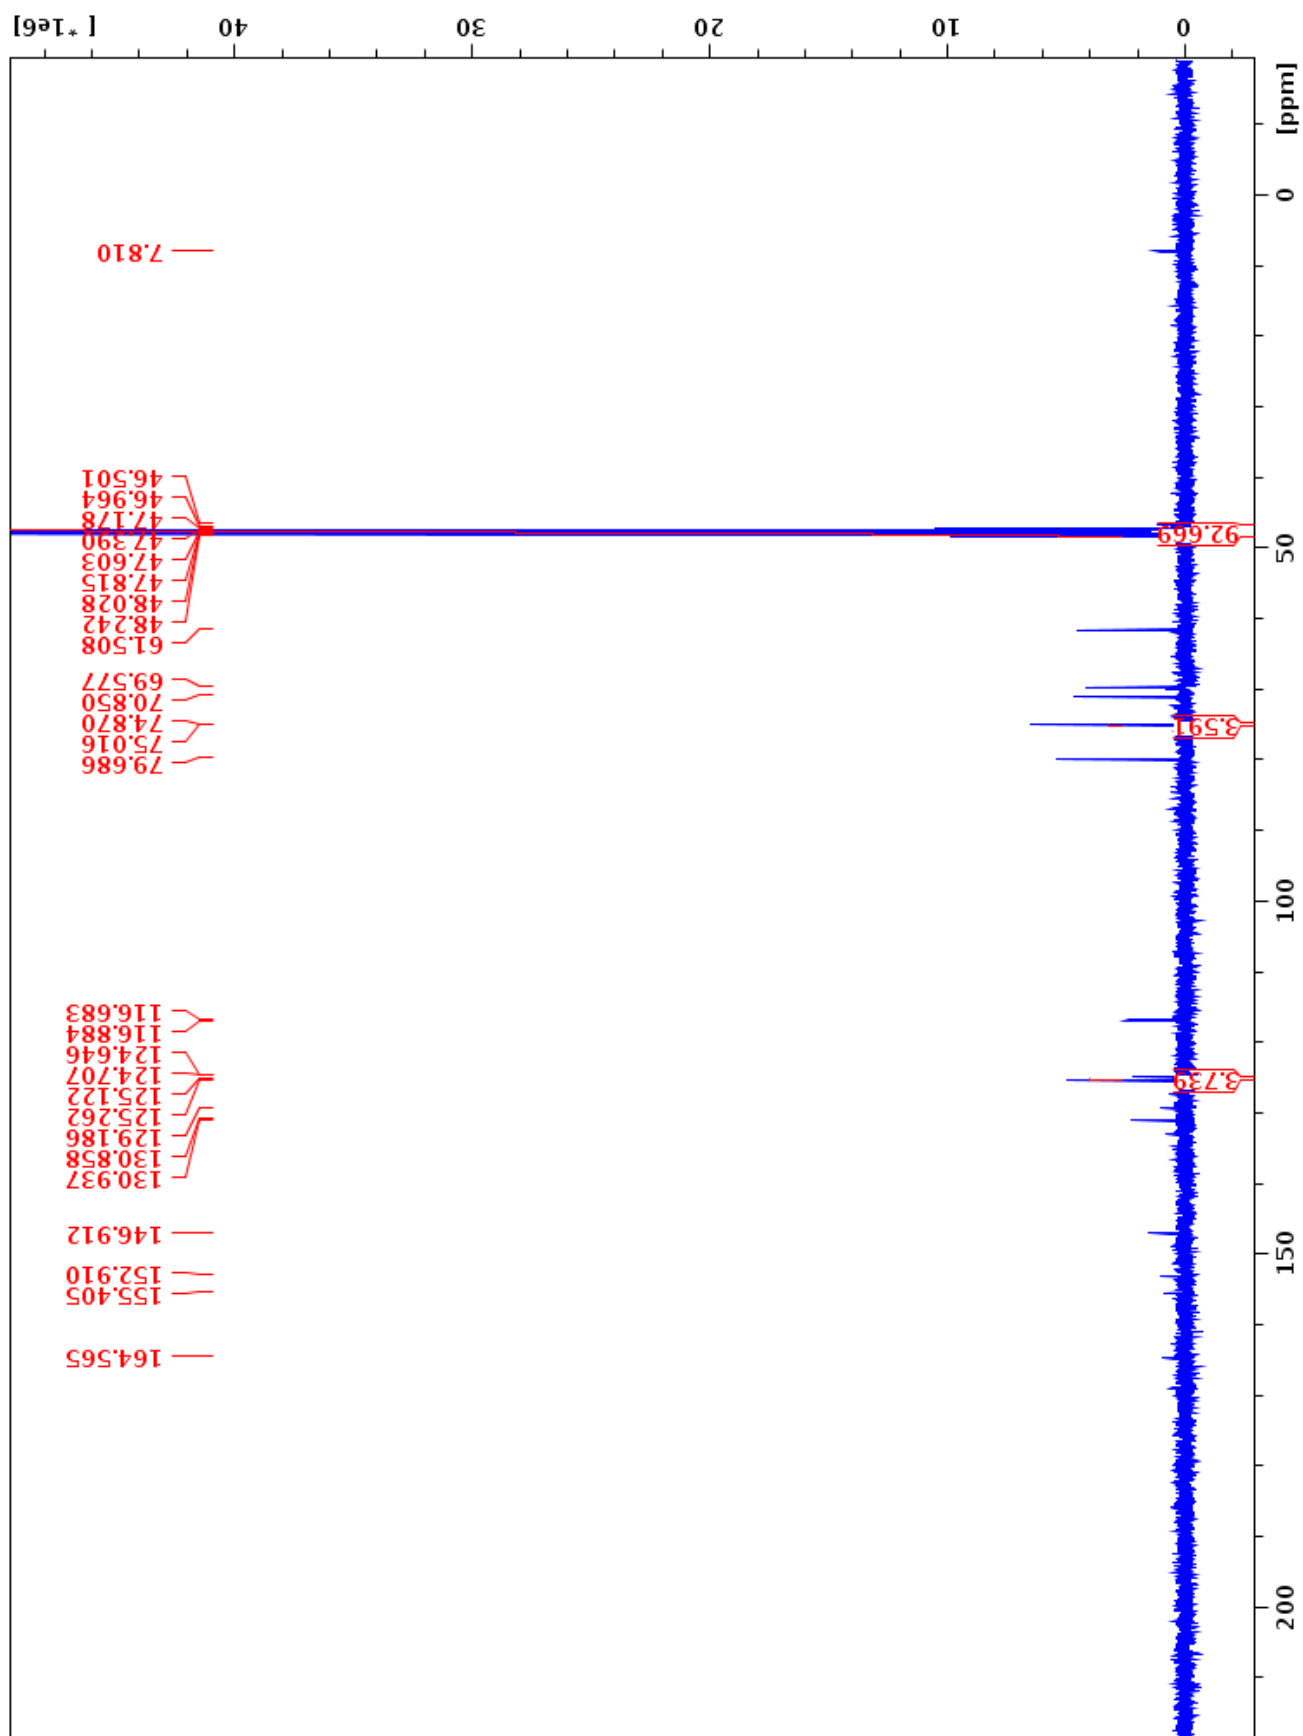



**2a:** 2-phenyl-5-(1-deoxy- $\beta$ -D-galactopyranosyl)oxazole

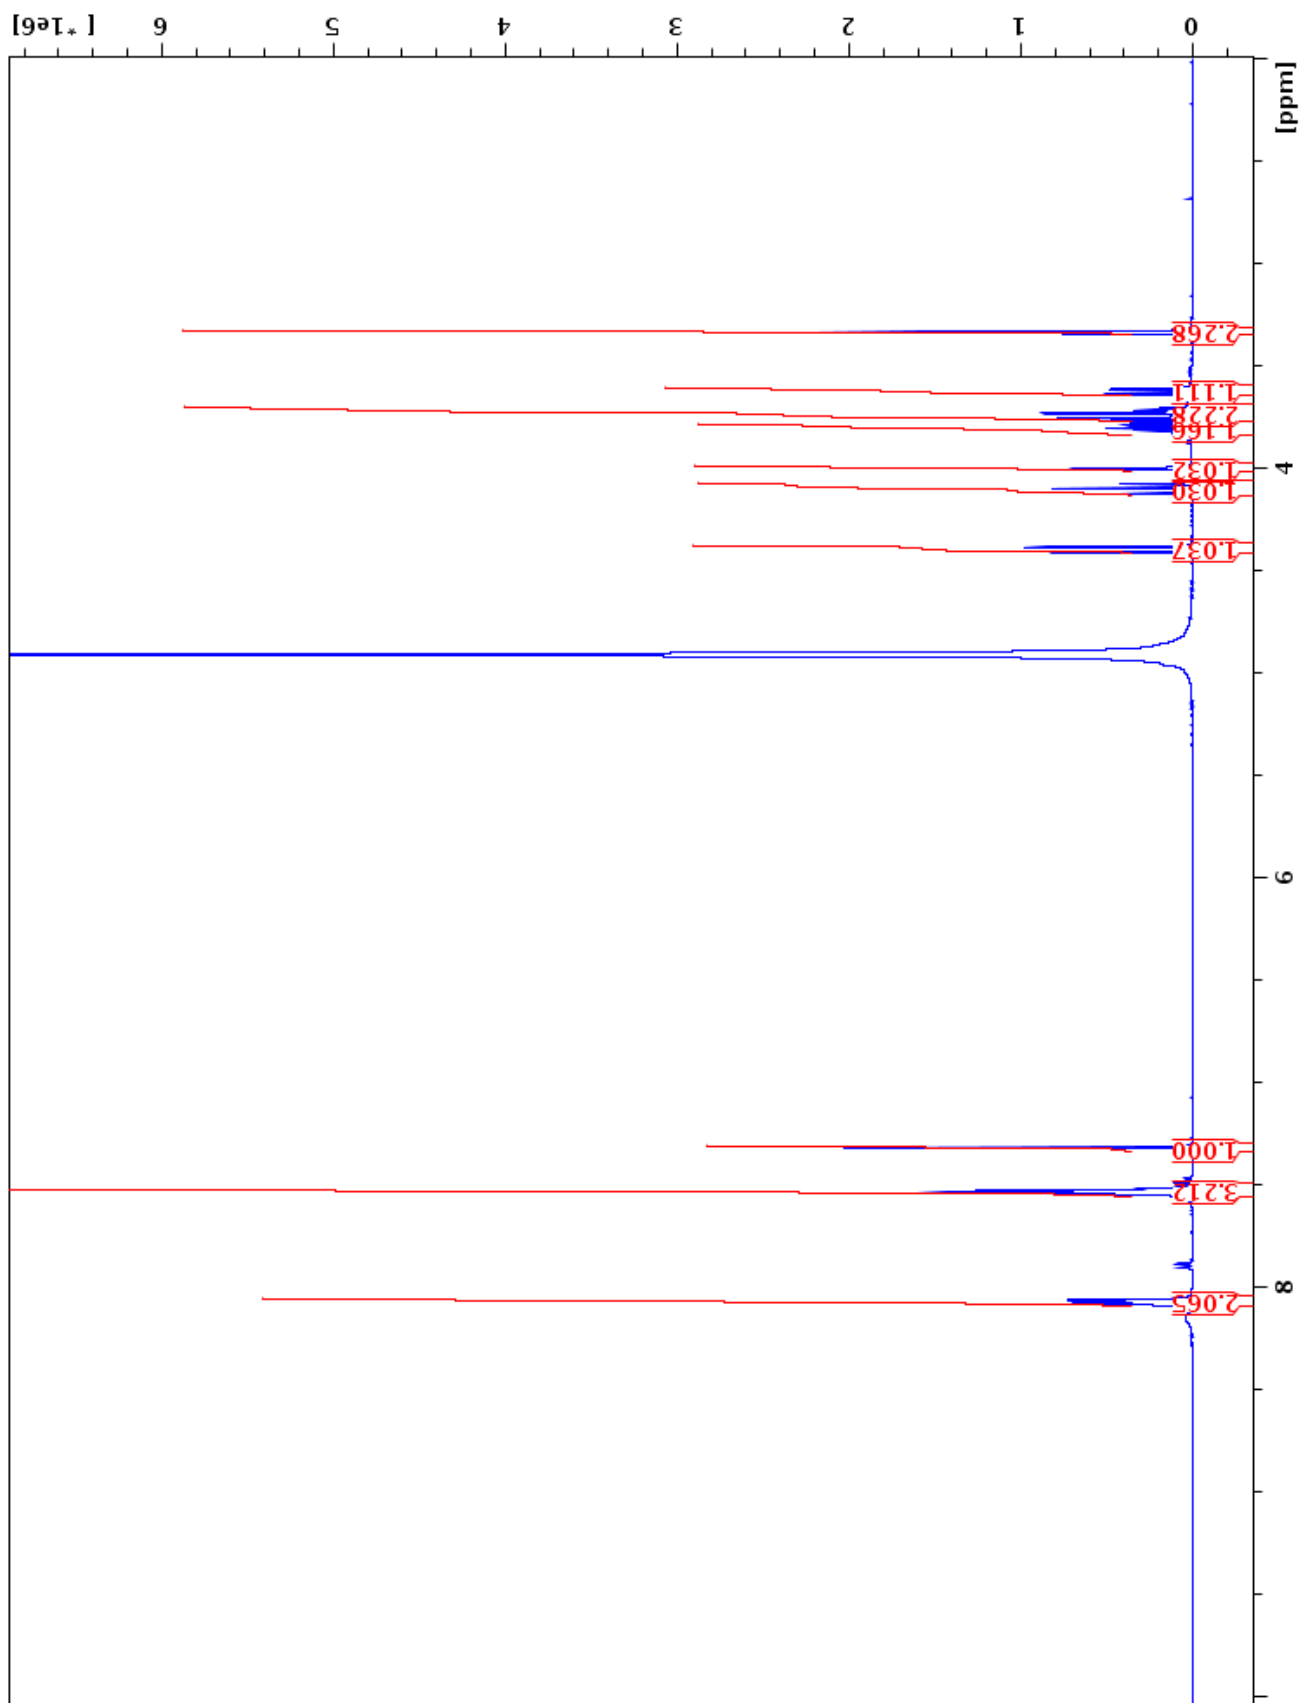

**2a:** 2-phenyl-5-(1-deoxy- $\beta$ -D-galactopyranosyl)oxazole

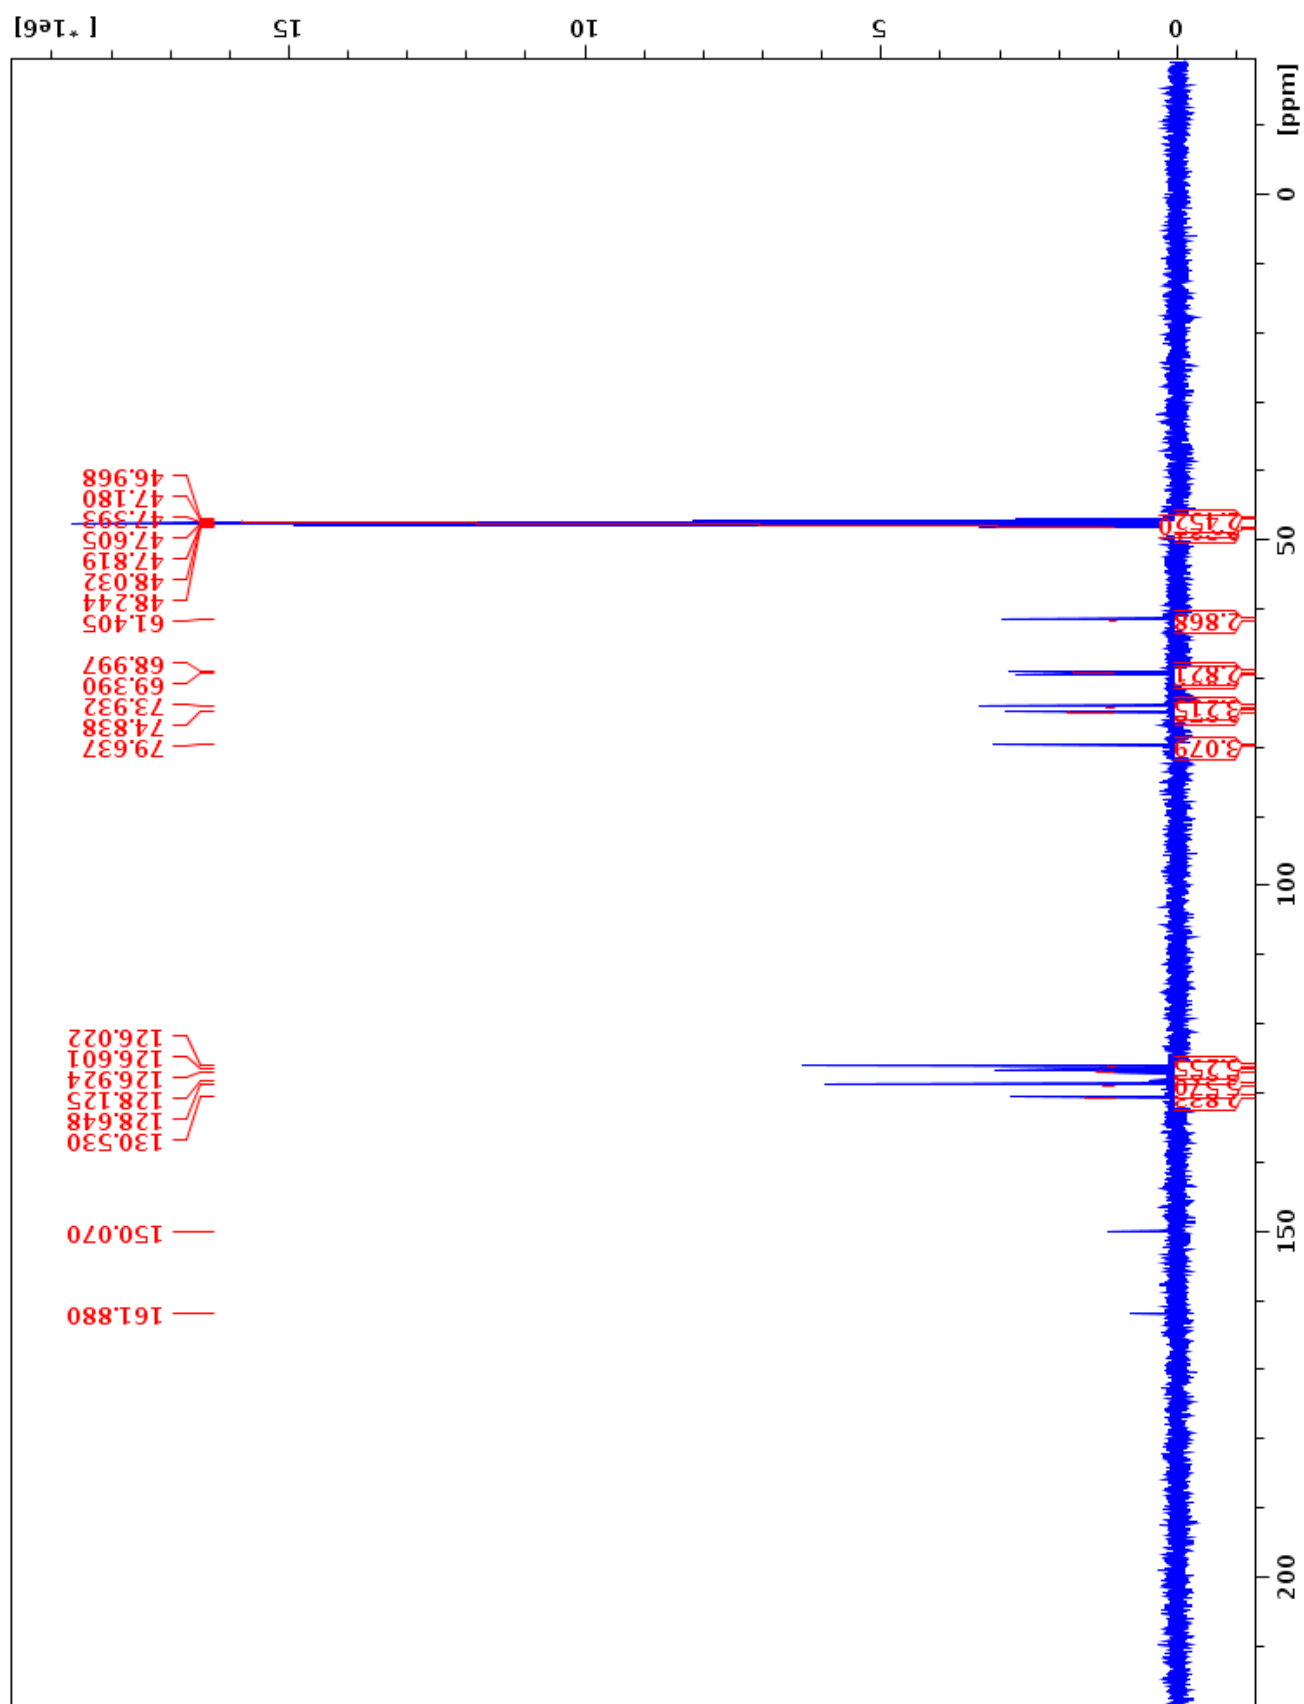

**2b:** 2-naphth-1-yl-5-(1-deoxy- $\beta$ -D-galactopyranosyl)oxazole

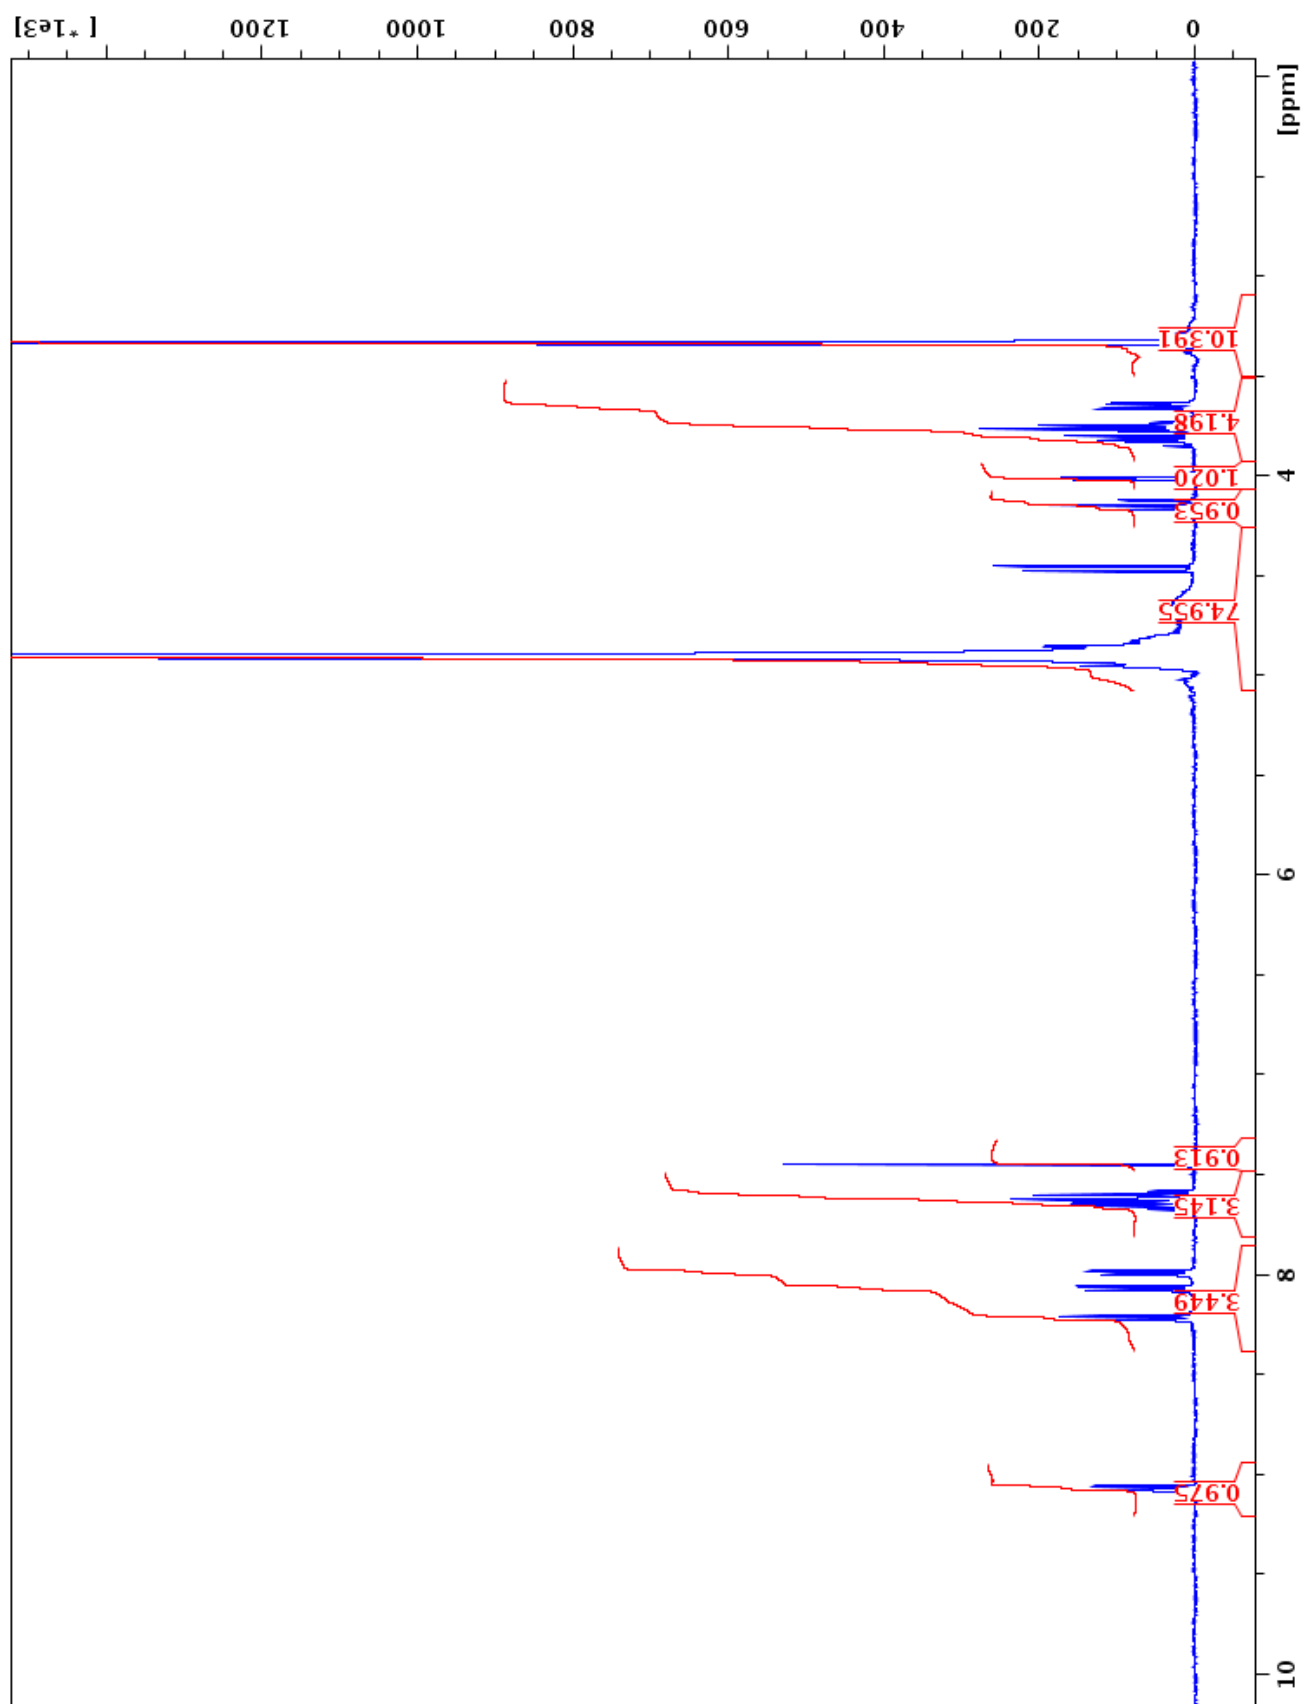

**2b:** 2-naphth-1-yl-5-(1-deoxy- $\beta$ -D-galactopyranosyl)oxazole

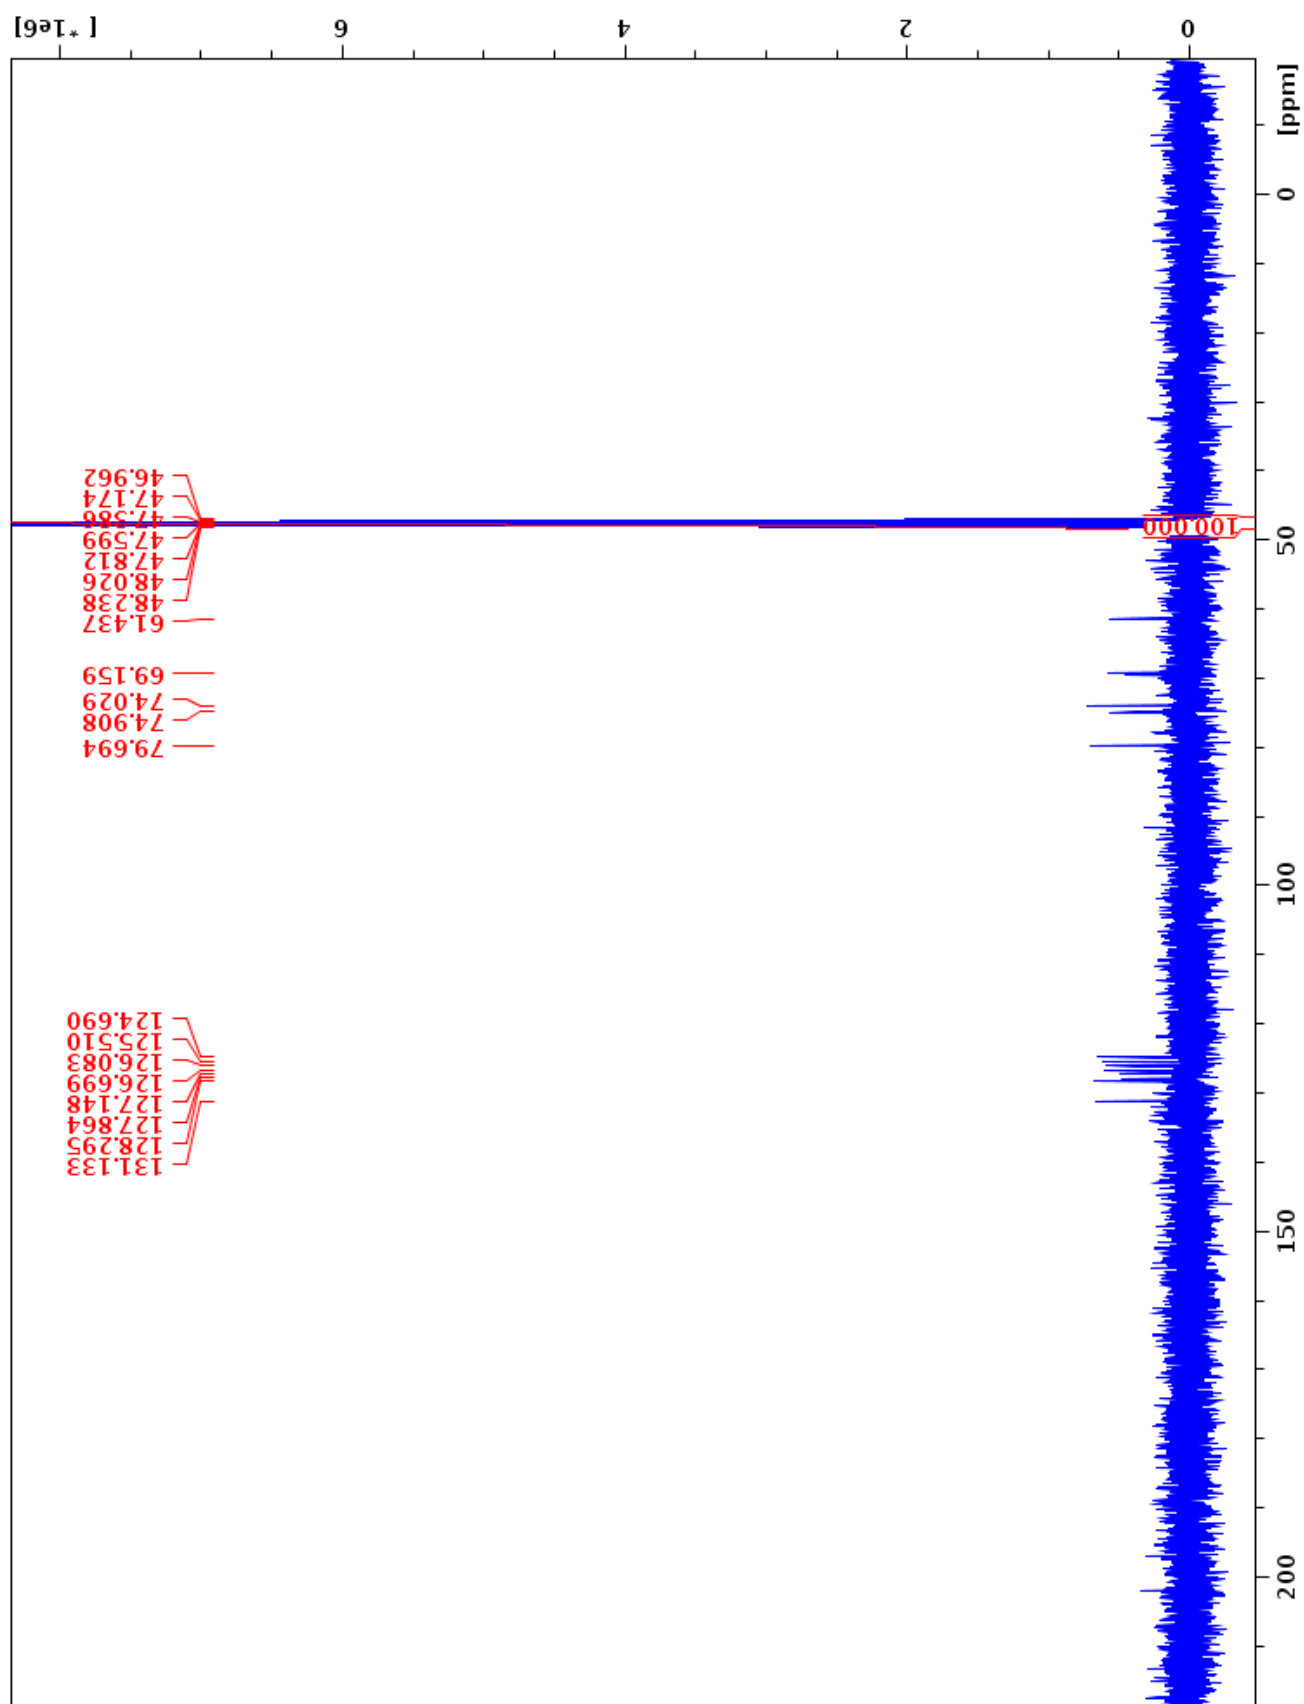

**2c:** 2-naphth-2-yl-5-(1-deoxy- $\beta$ -D-galactopyranosyl)oxazole

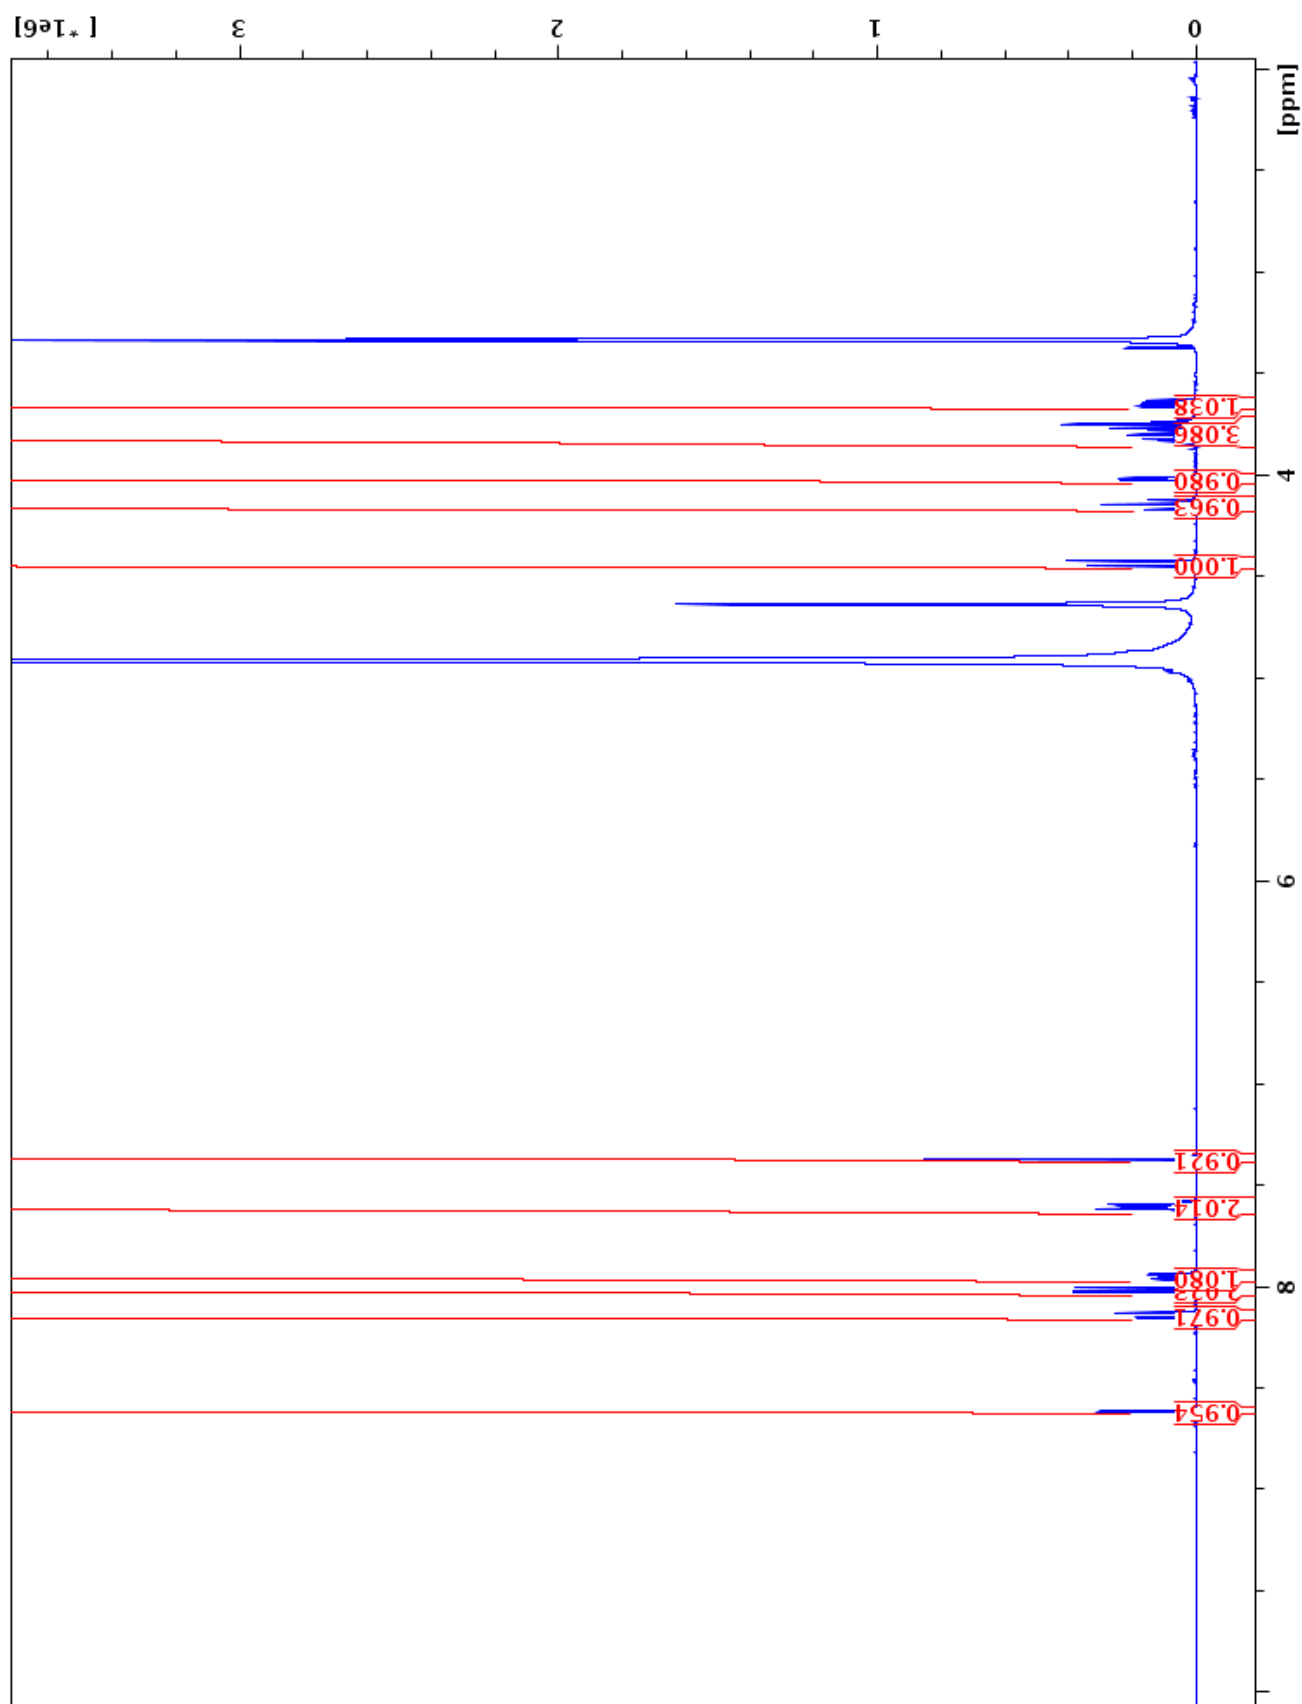

**2c:** 2-naphth-2-yl-5-(1-deoxy- $\beta$ -D-galactopyranosyl)oxazole

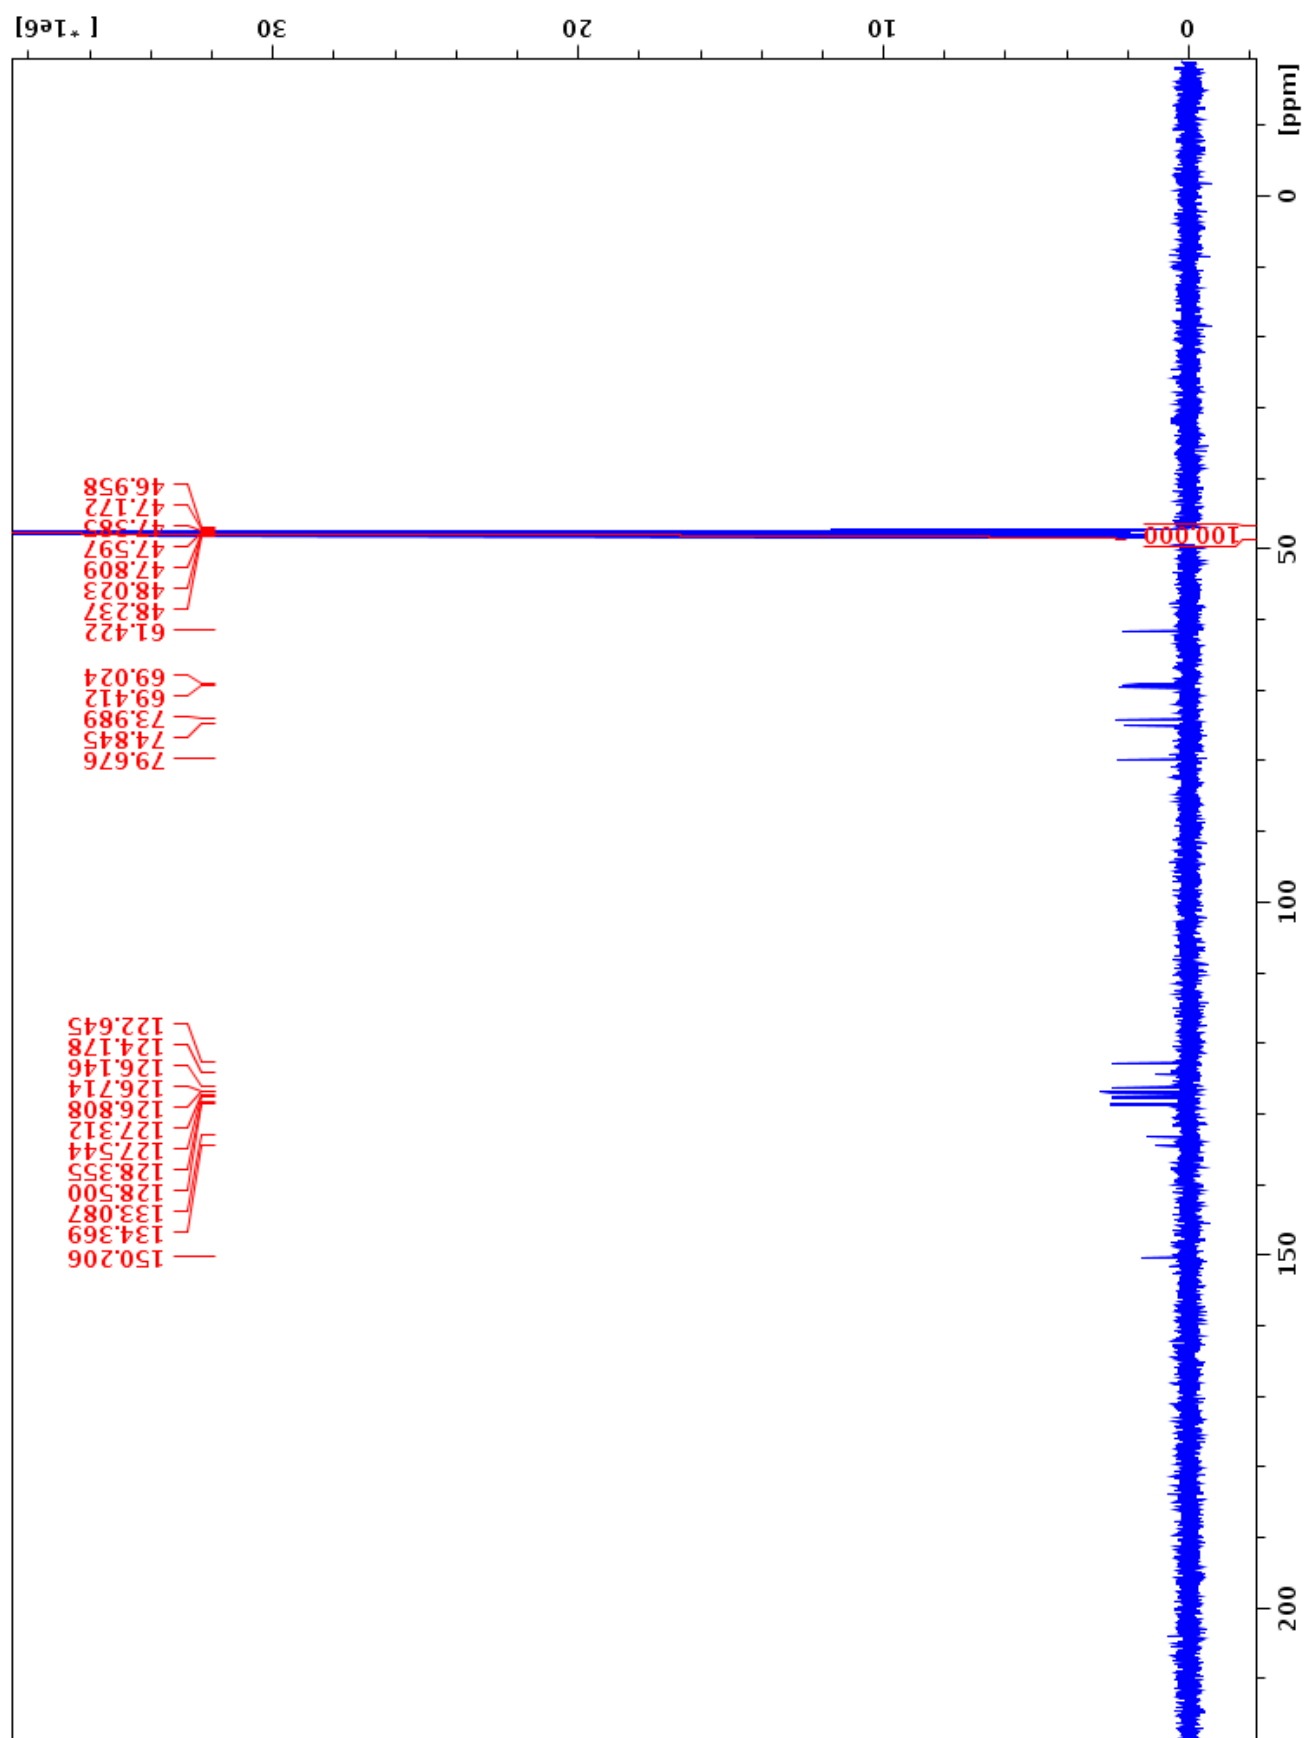

**2d:** 2-(4-chlorophenyl)-5-(1-deoxy- $\beta$ -D-galactopyranosyl)oxazole

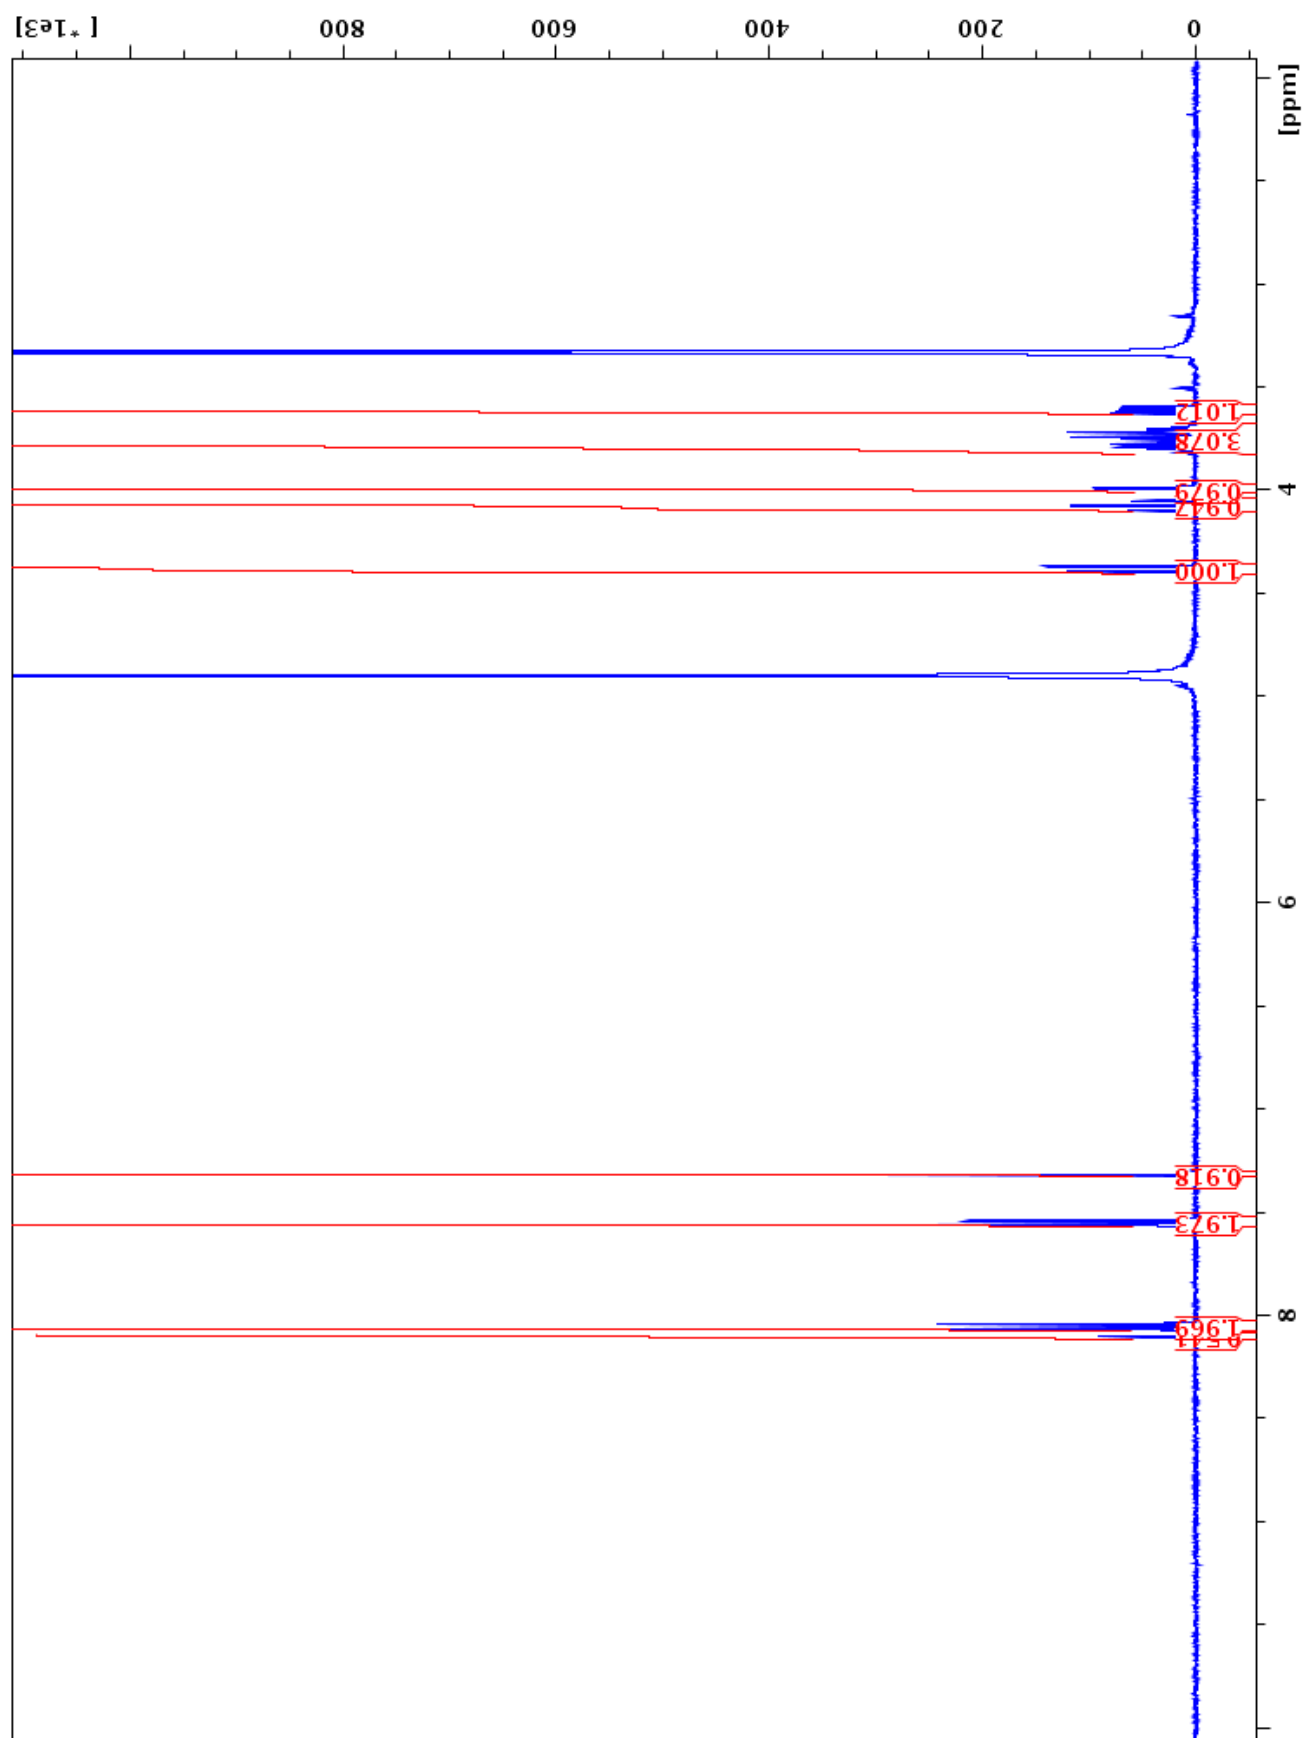

**2d:** 2-(4-chlorophenyl)-5-(1-deoxy- $\beta$ -D-galactopyranosyl)oxazole

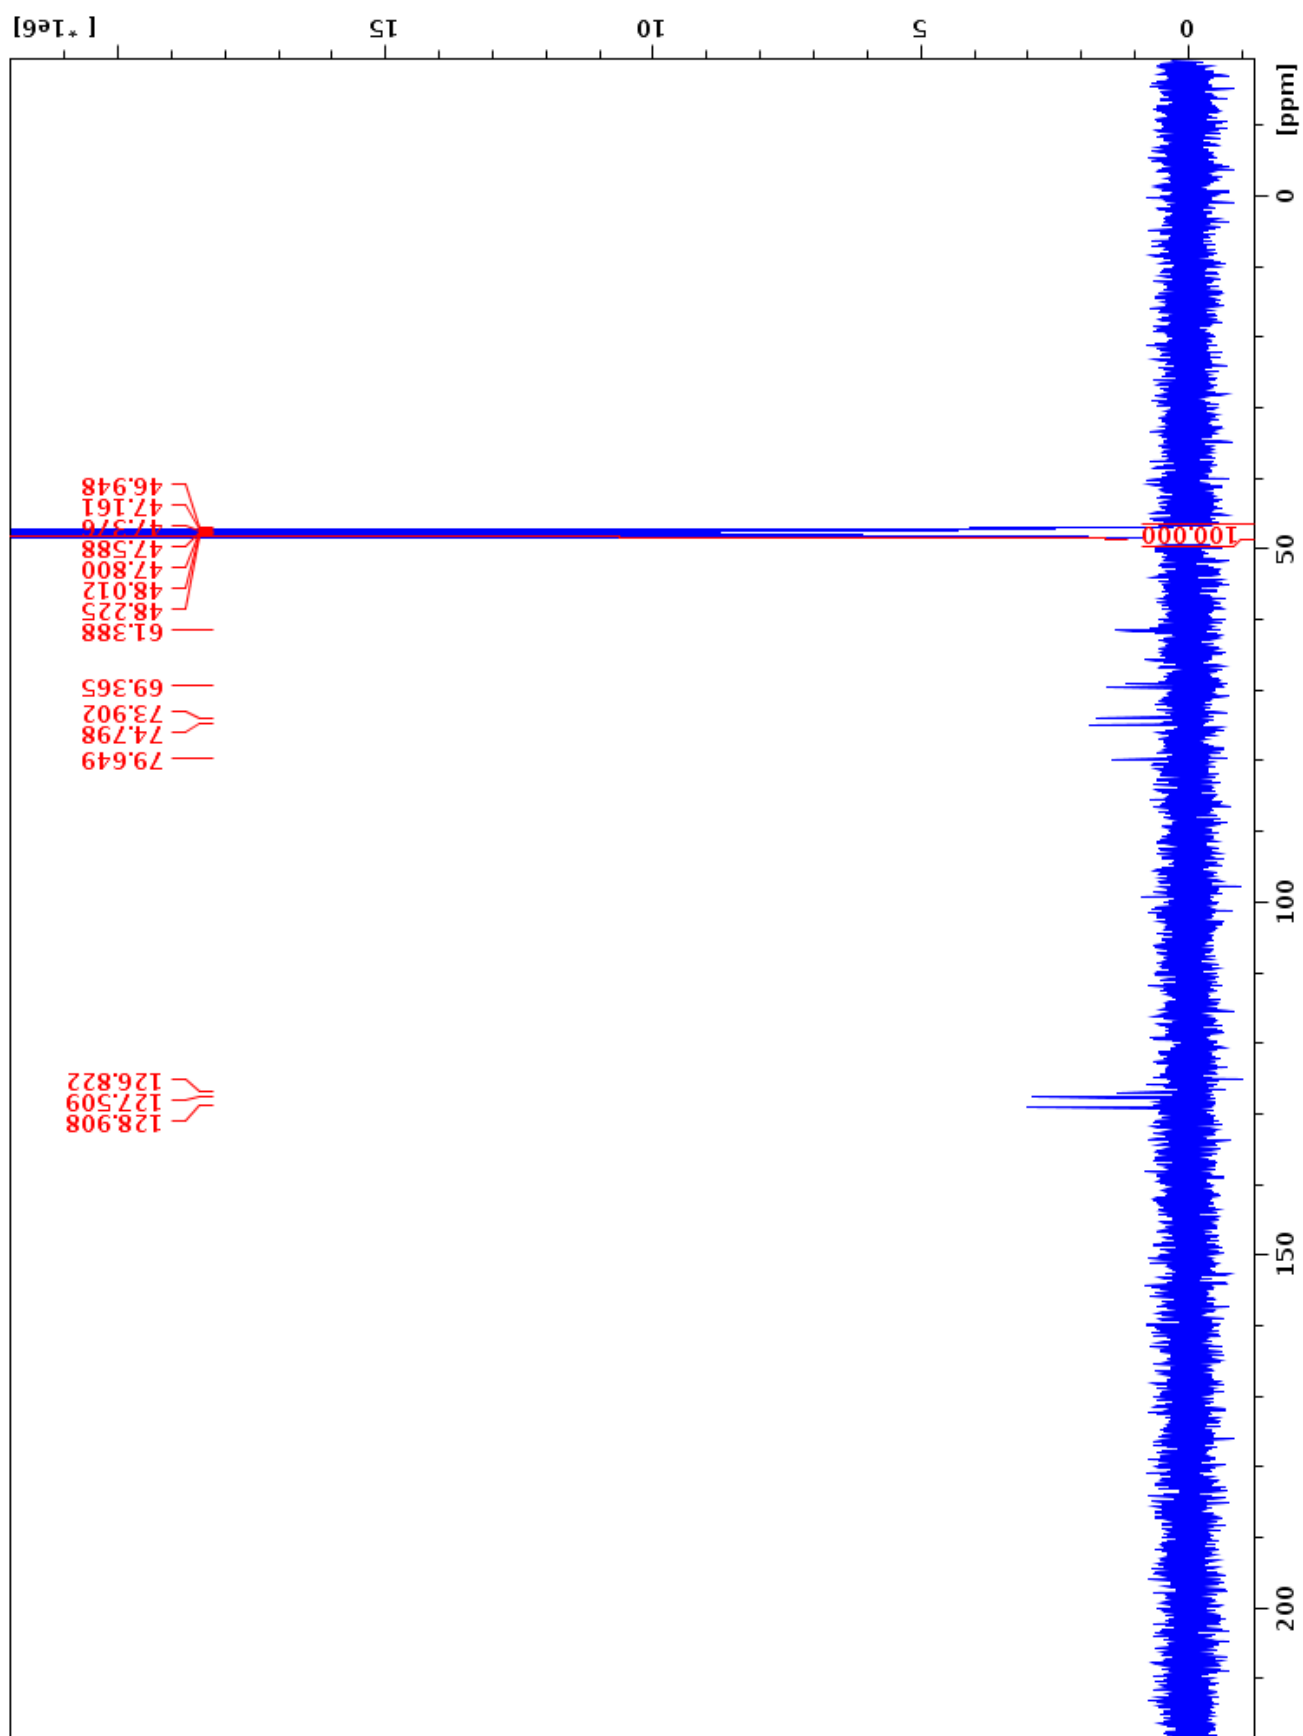



**2e:** 2-(3-chlorophenyl)-5-(1-deoxy- $\beta$ -D-galactopyranosyl)oxazole

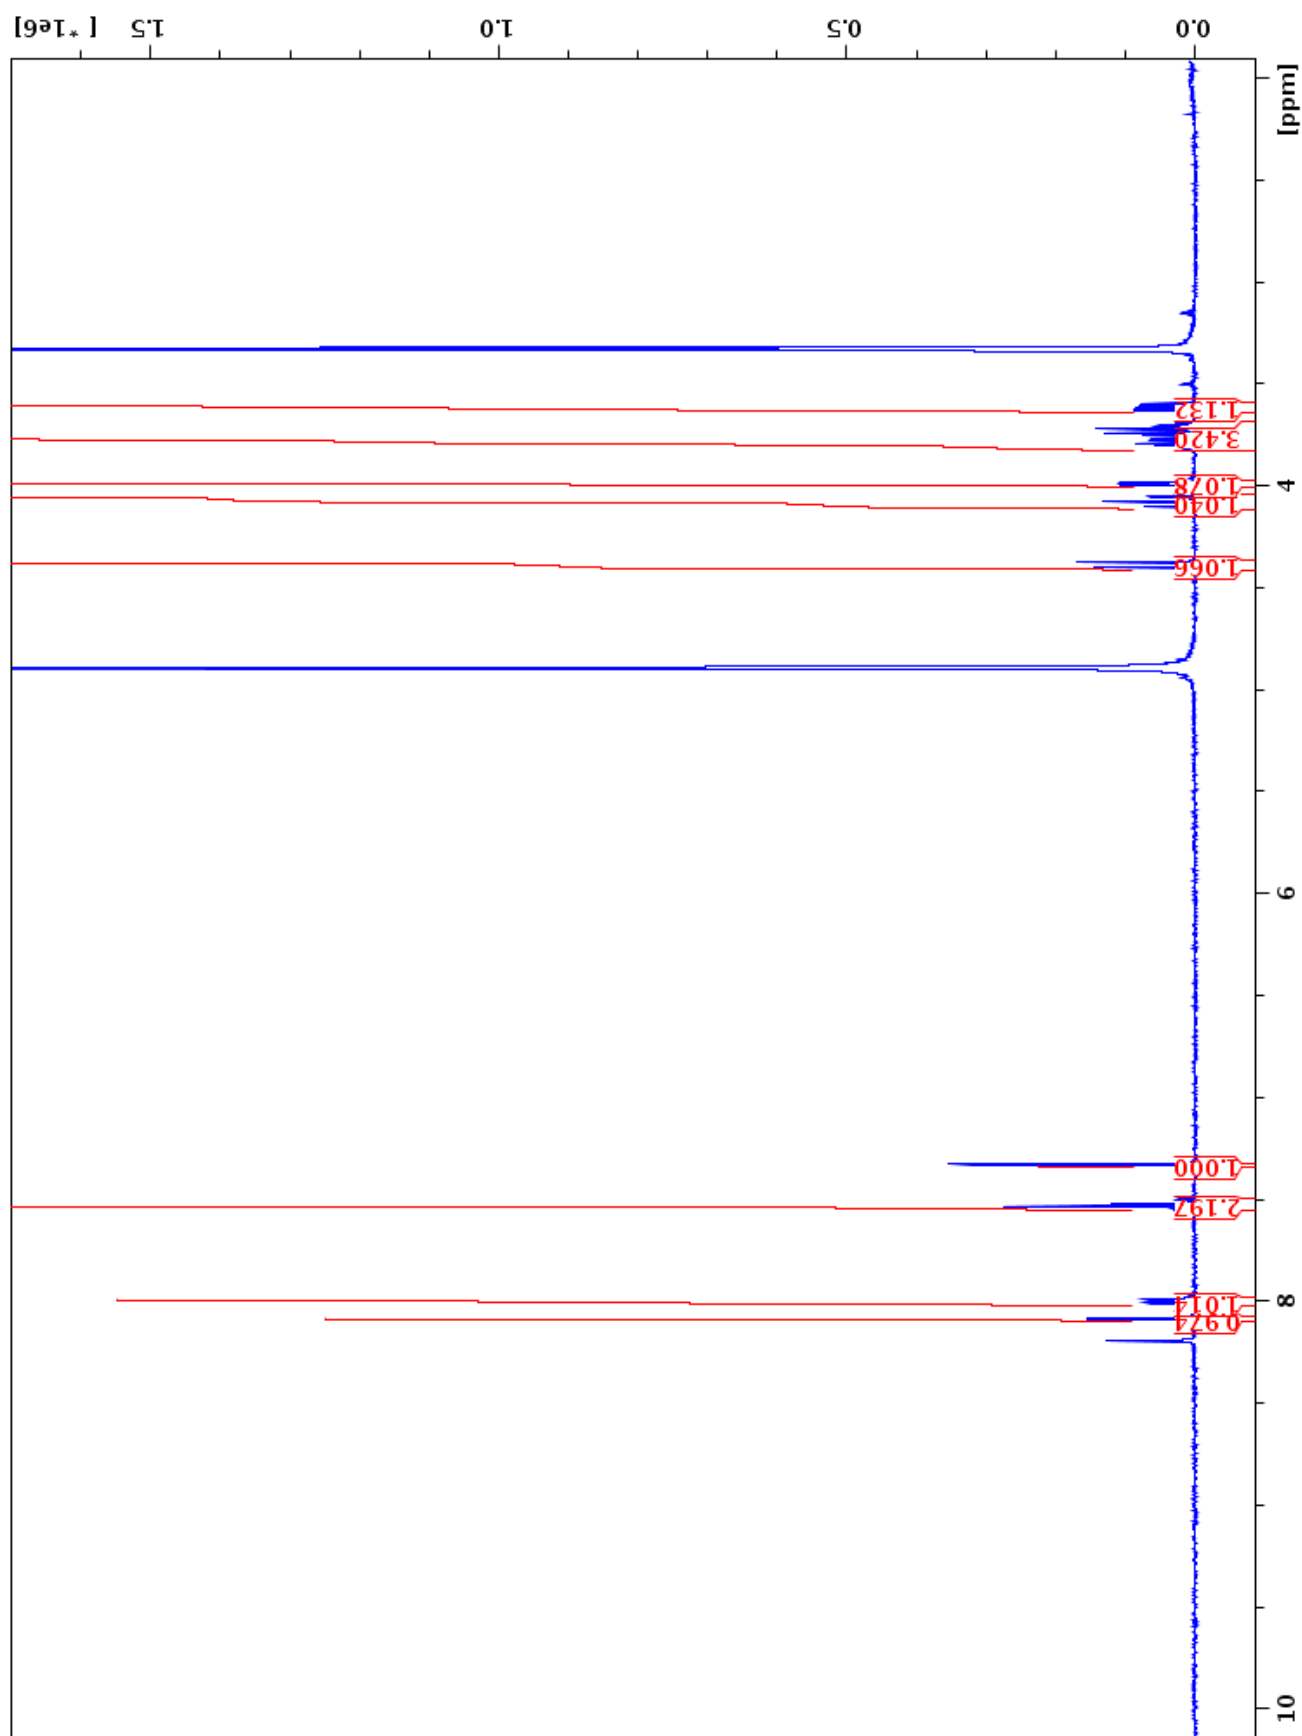

**2e:** 2-(3-chlorophenyl)-5-(1-deoxy- $\beta$ -D-galactopyranosyl)oxazole

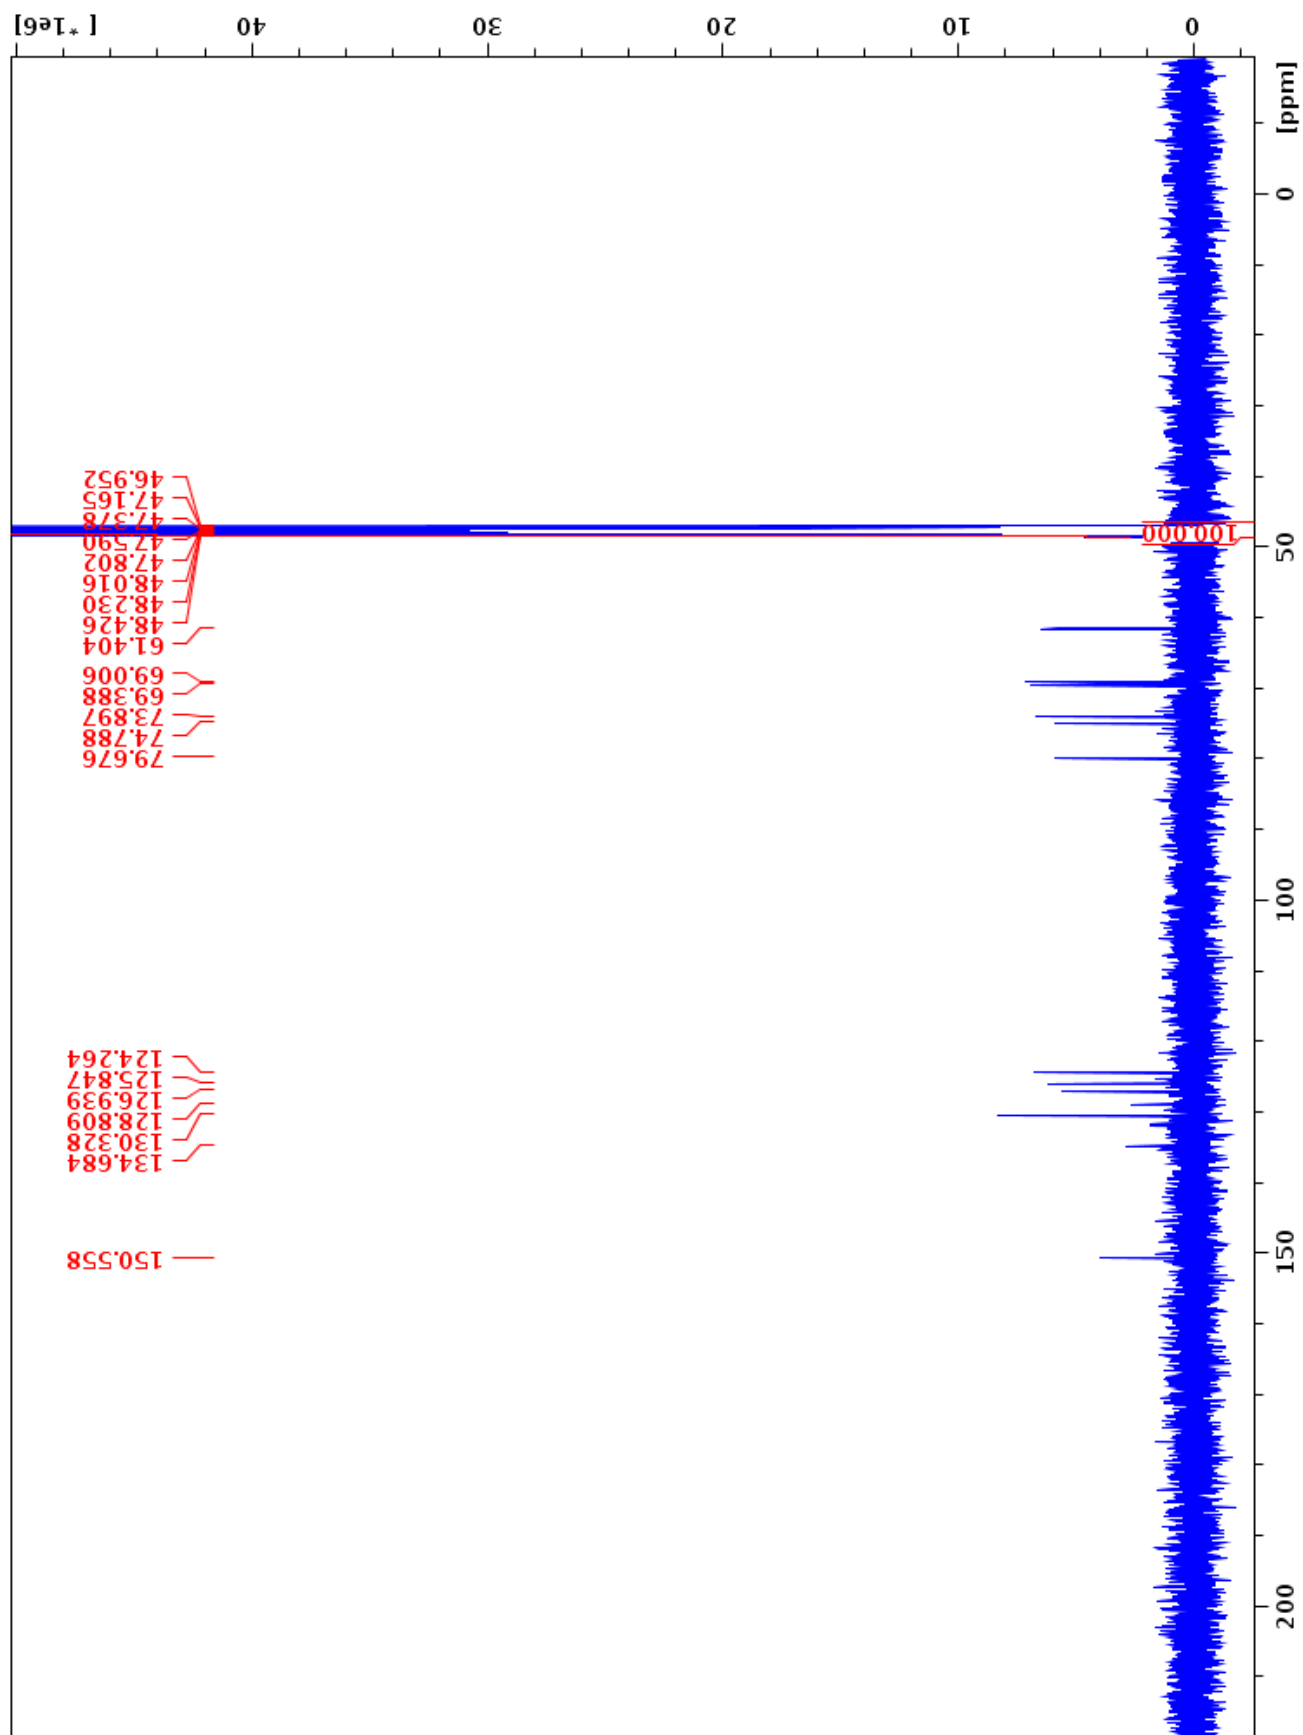

**2f:** 2-(4-methylphenyl)-5-(1-deoxy- $\beta$ -D-galactopyranosyl)oxazole

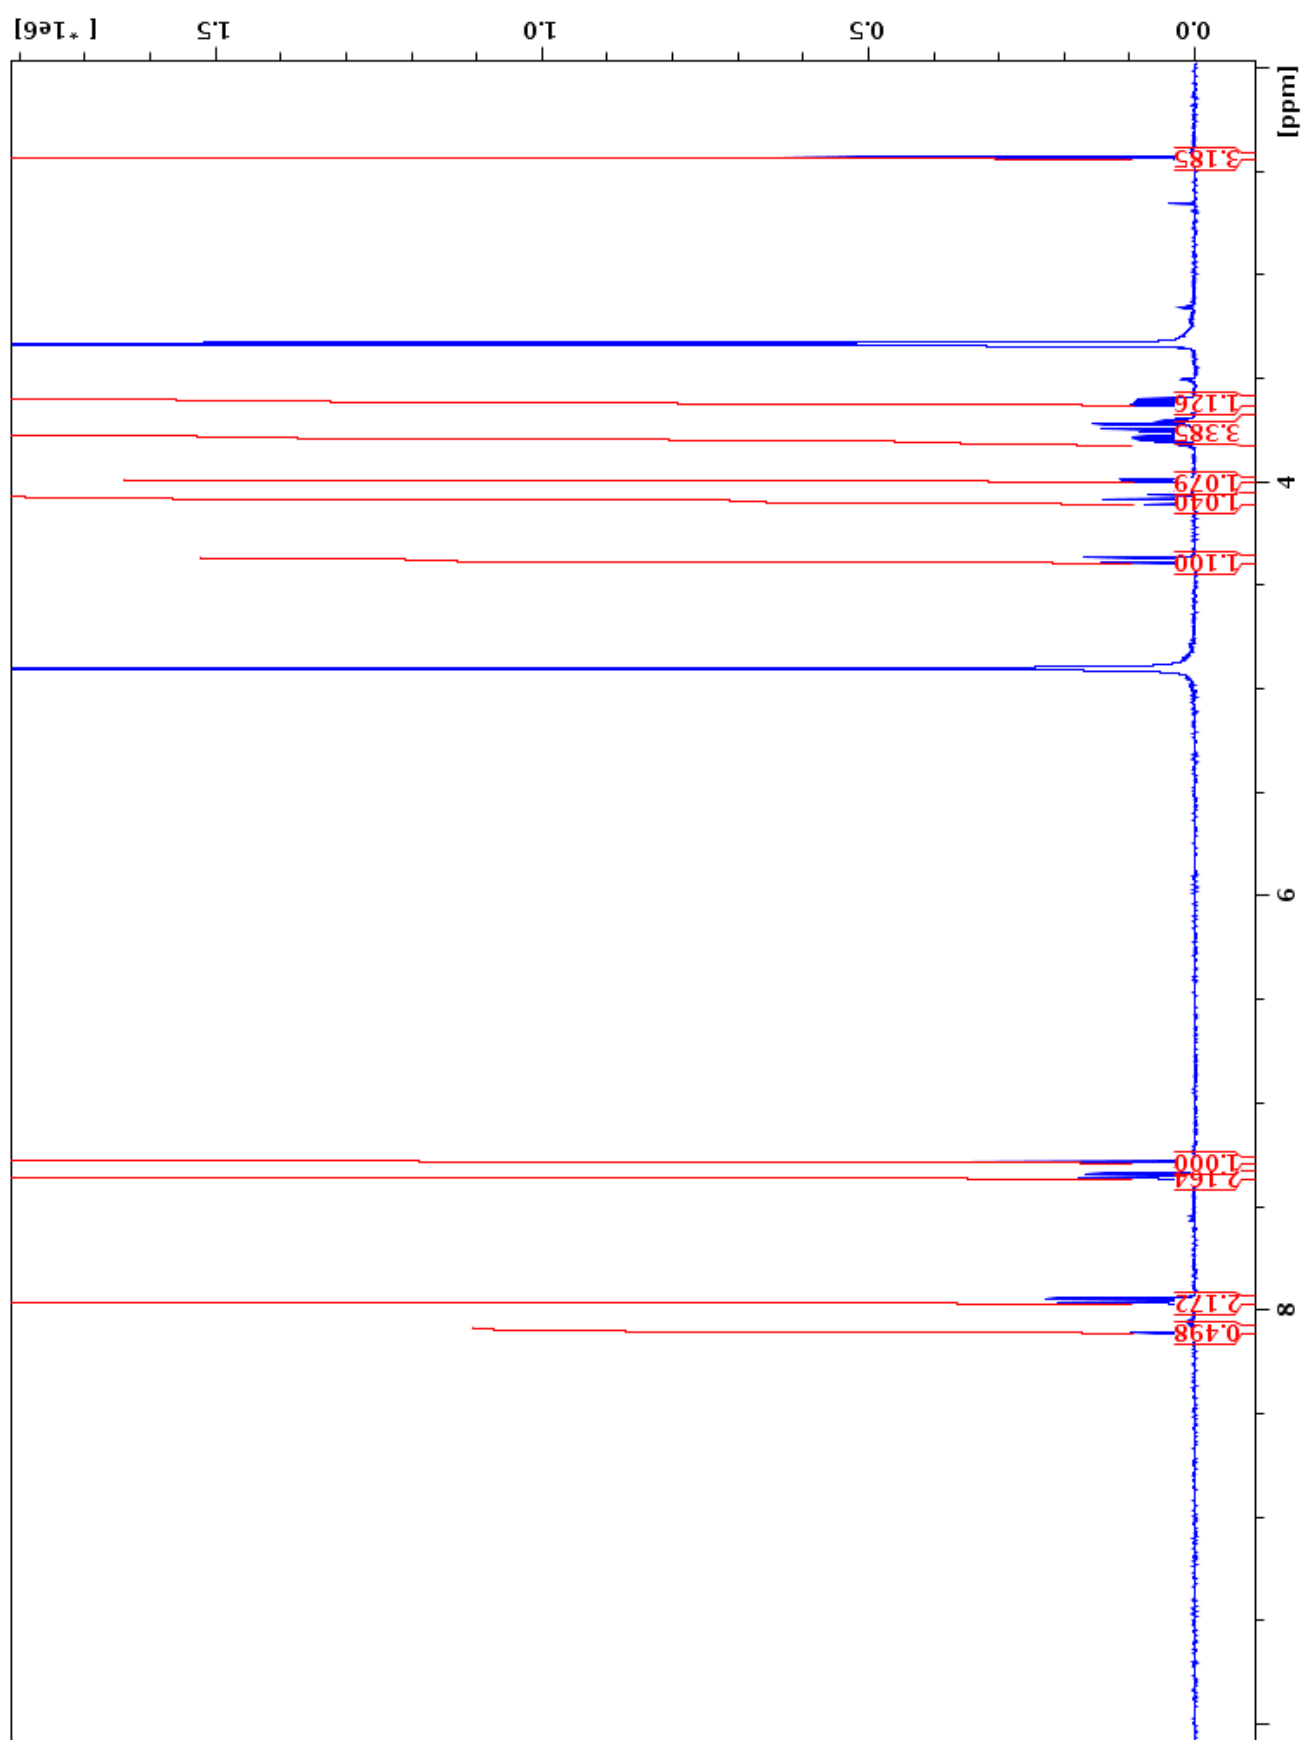

**2f:** 2-(4-methylphenyl)-5-(1-deoxy- $\beta$ -D-galactopyranosyl)oxazole

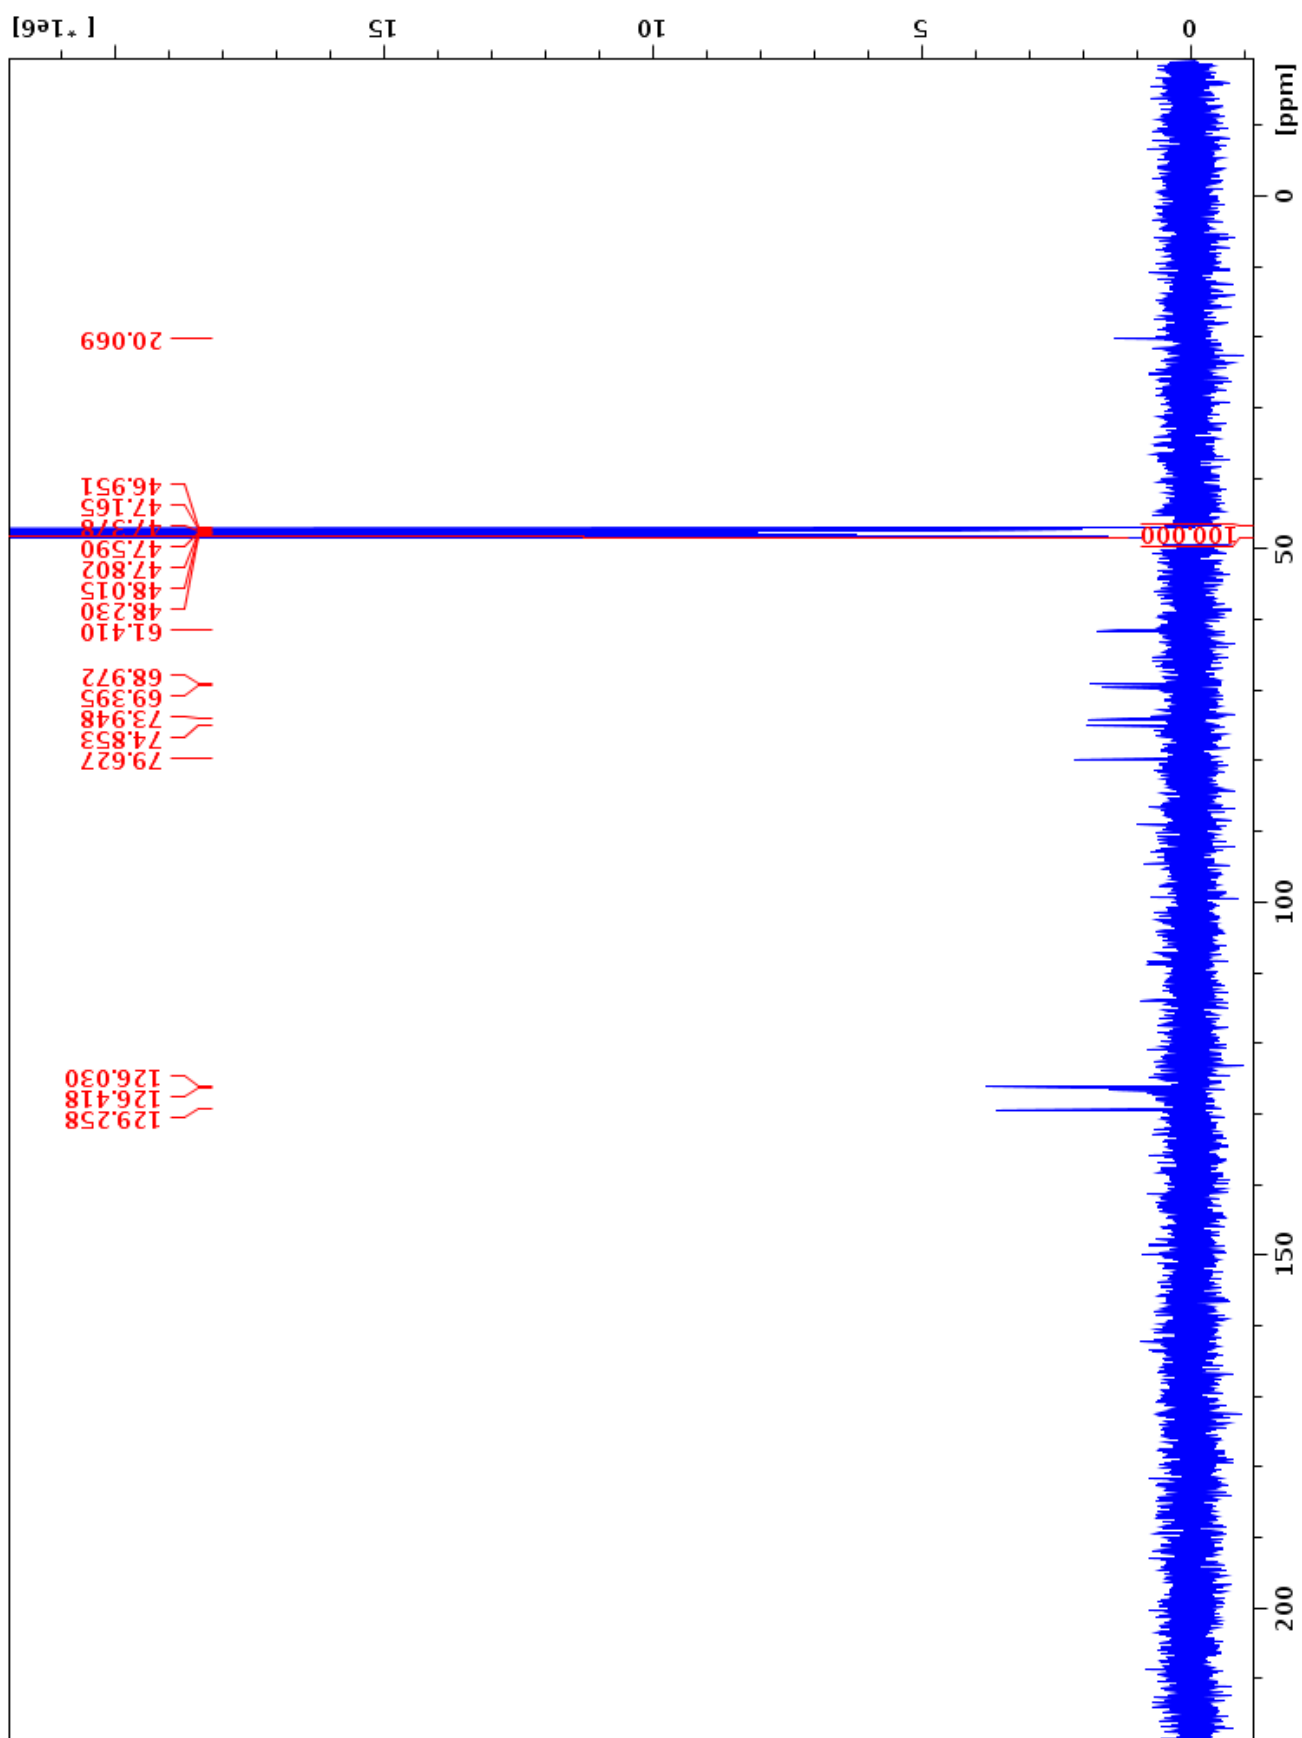

**2g:** 2-(3-methylphenyl)-5-(1-deoxy- $\beta$ -D-galactopyranosyl)oxazole

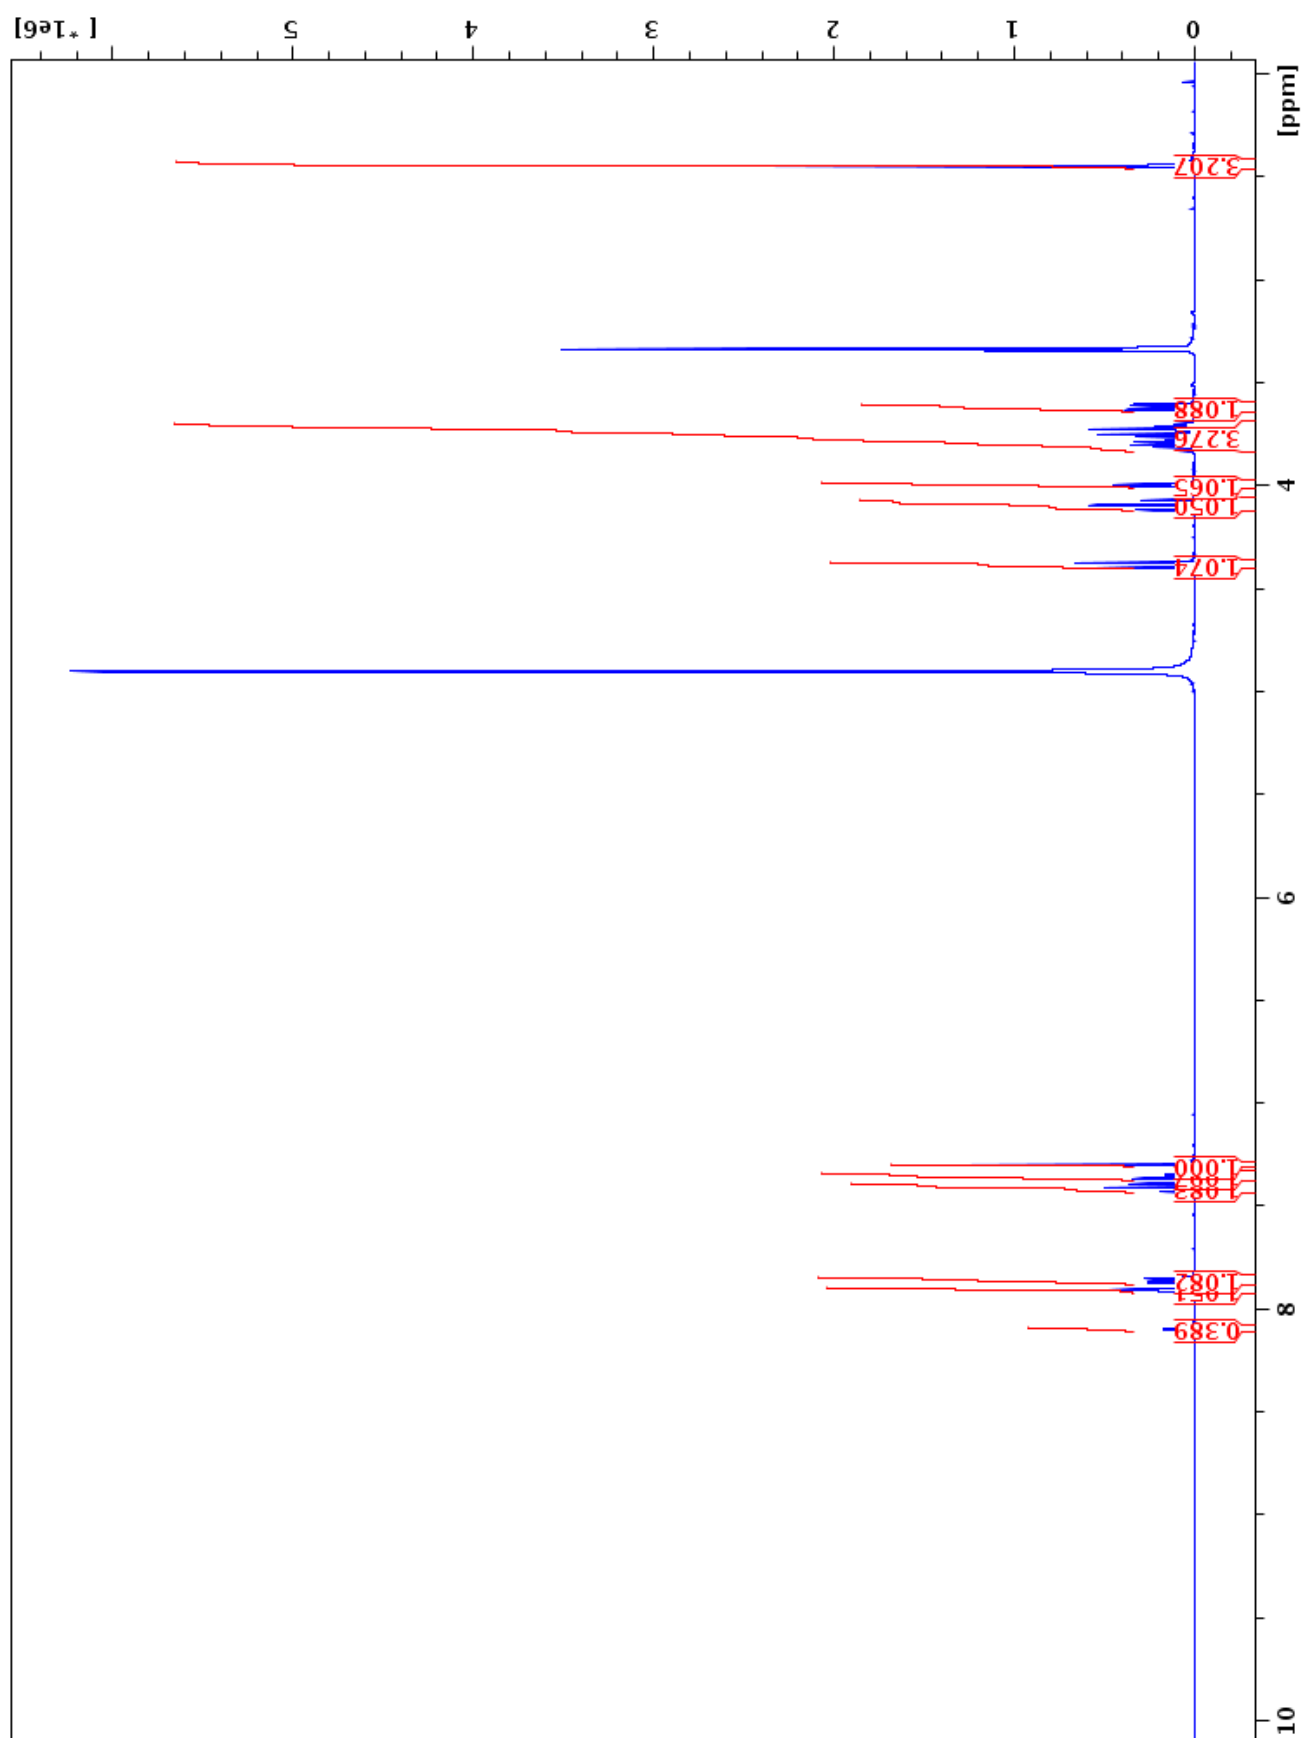

**2g:** 2-(3-methylphenyl)-5-(1-deoxy- $\beta$ -D-galactopyranosyl)oxazole

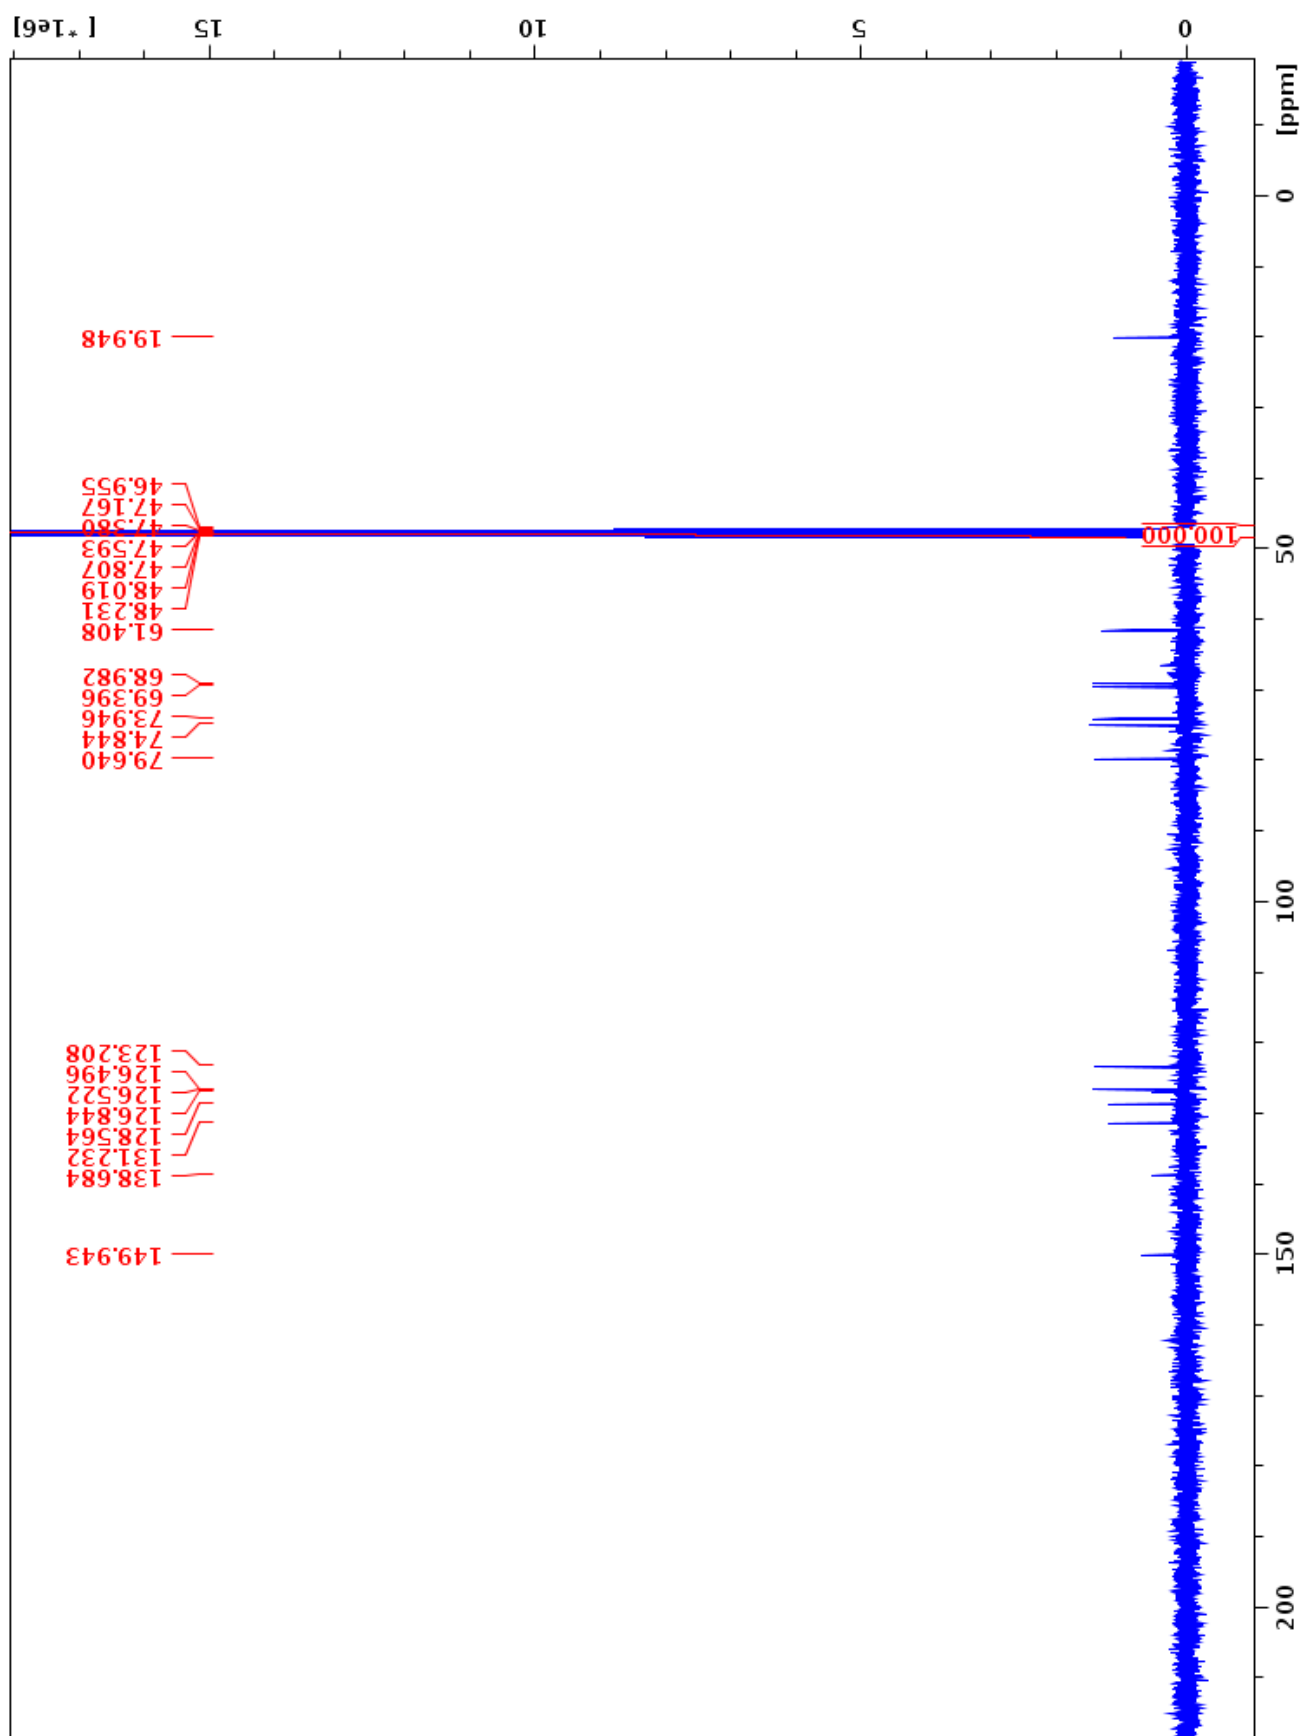

**2h:** 2-(4-fluorophenyl)-5-(1-deoxy- $\beta$ -D-galactopyranosyl)oxazole

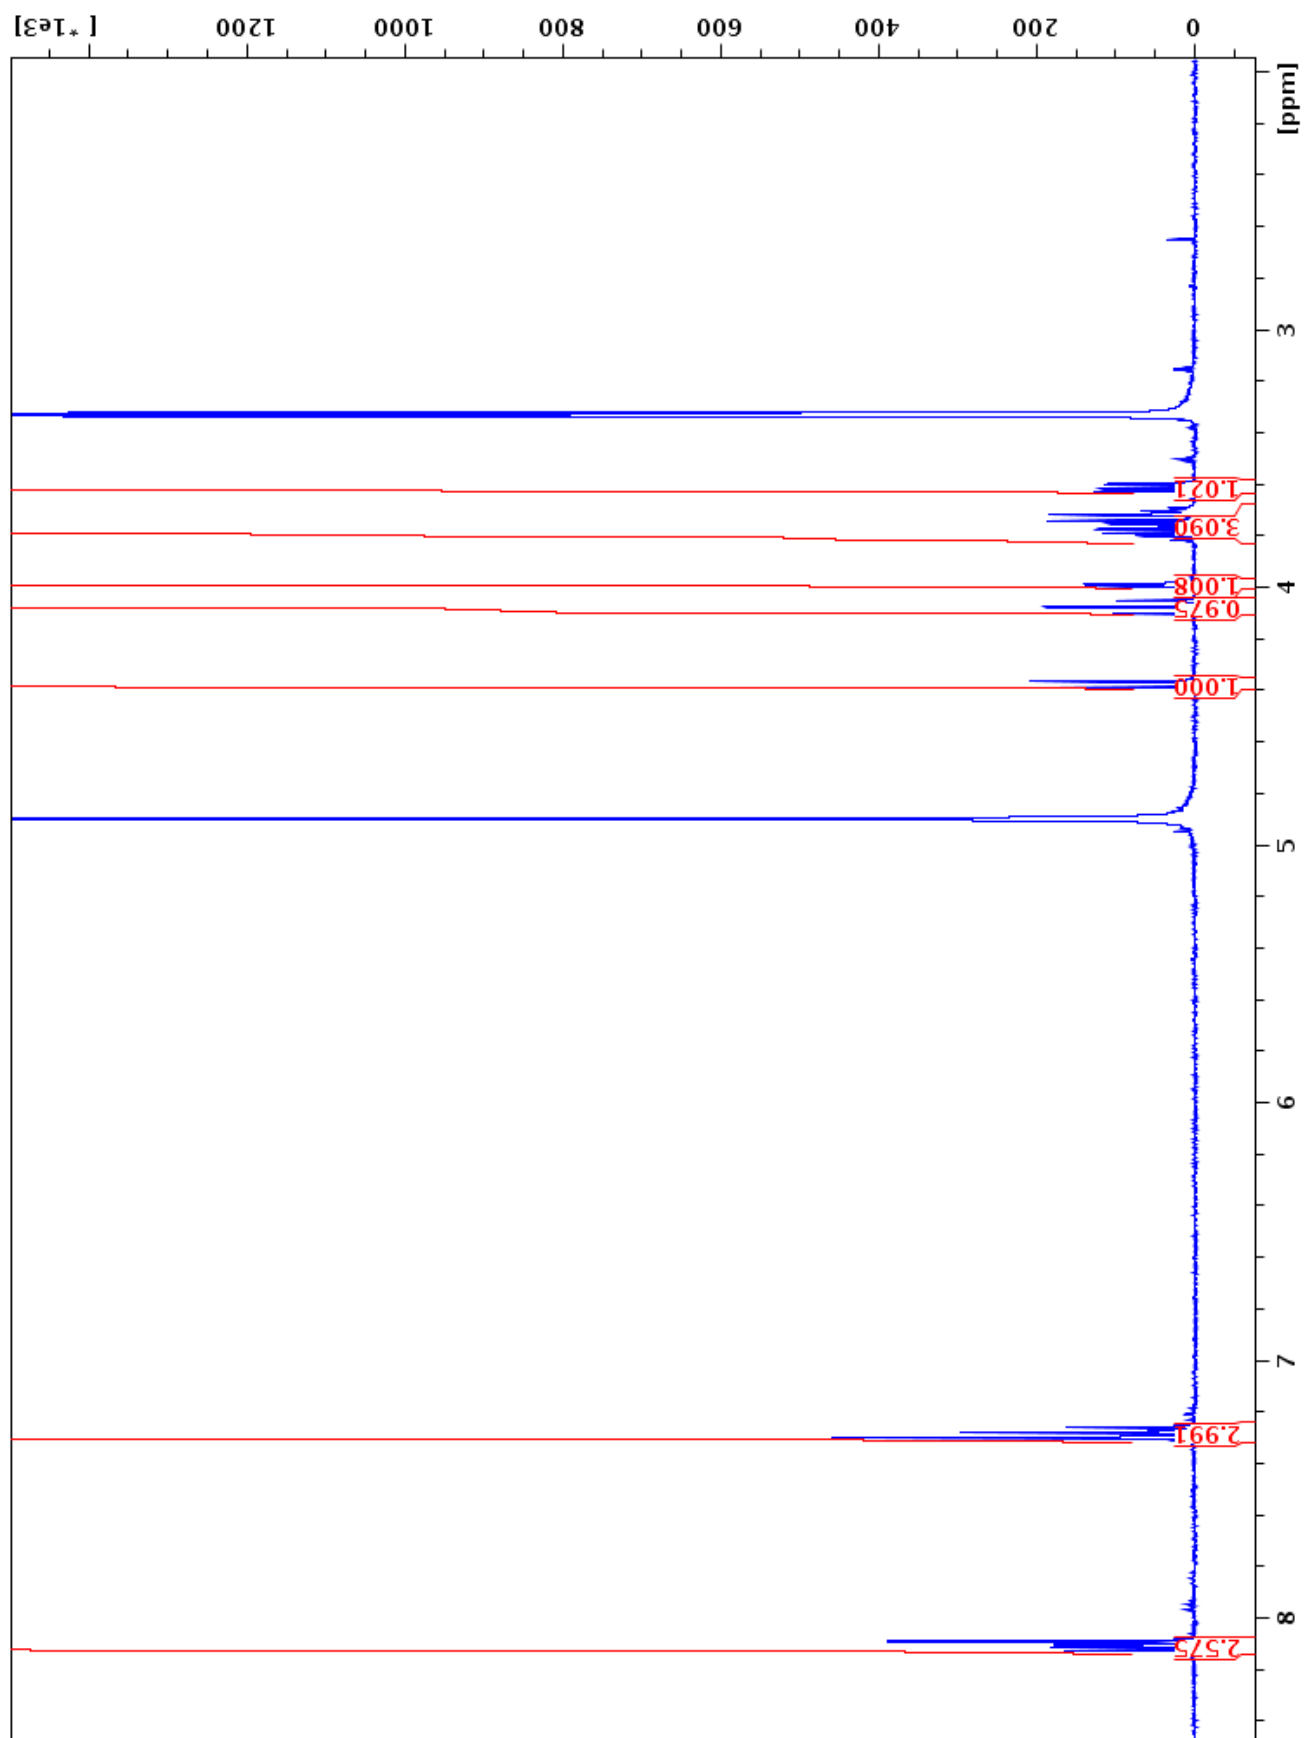

**2h:** 2-(4-fluorophenyl)-5-(1-deoxy- $\beta$ -D-galactopyranosyl)oxazole

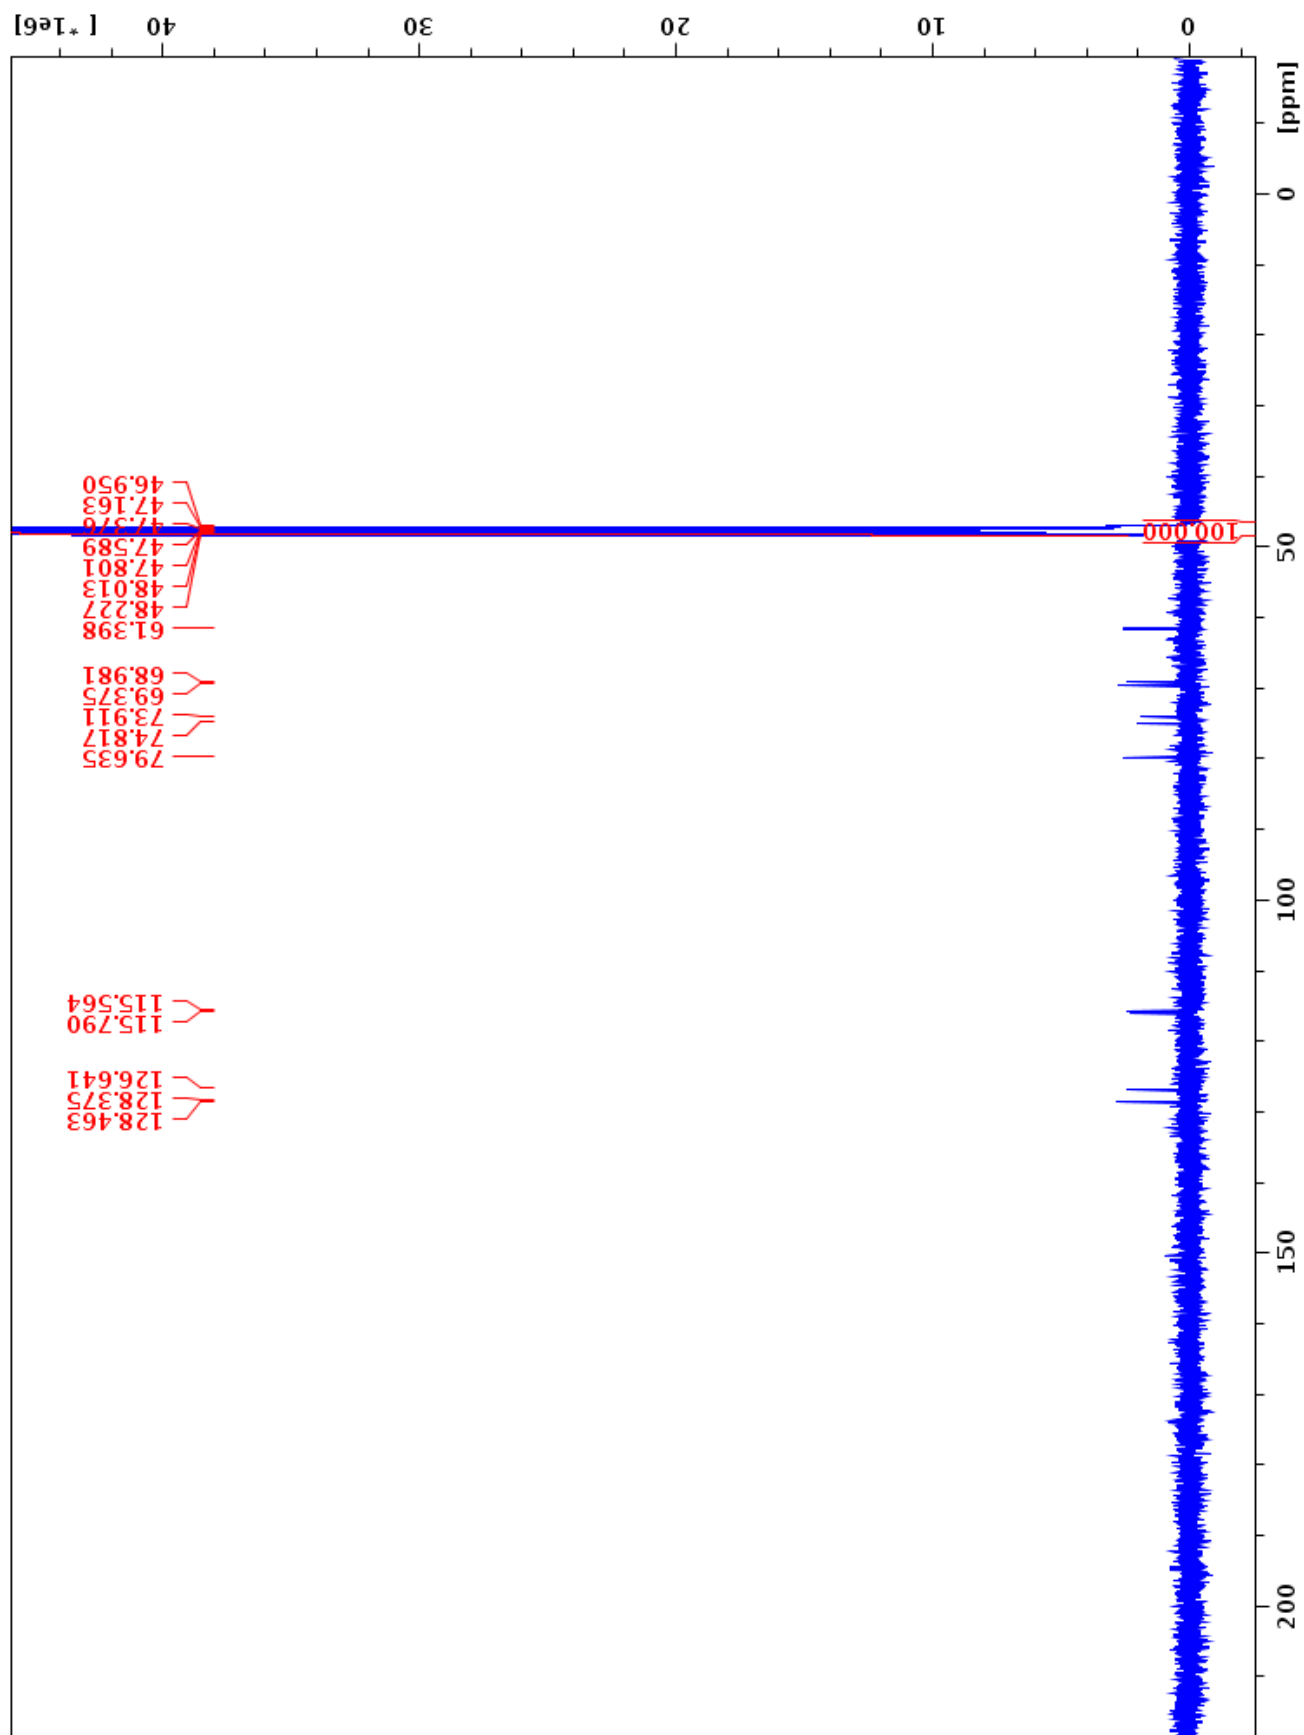



**2i:** 2-(3-fluorophenyl)-5-(1-deoxy- $\beta$ -D-galactopyranosyl)oxazole

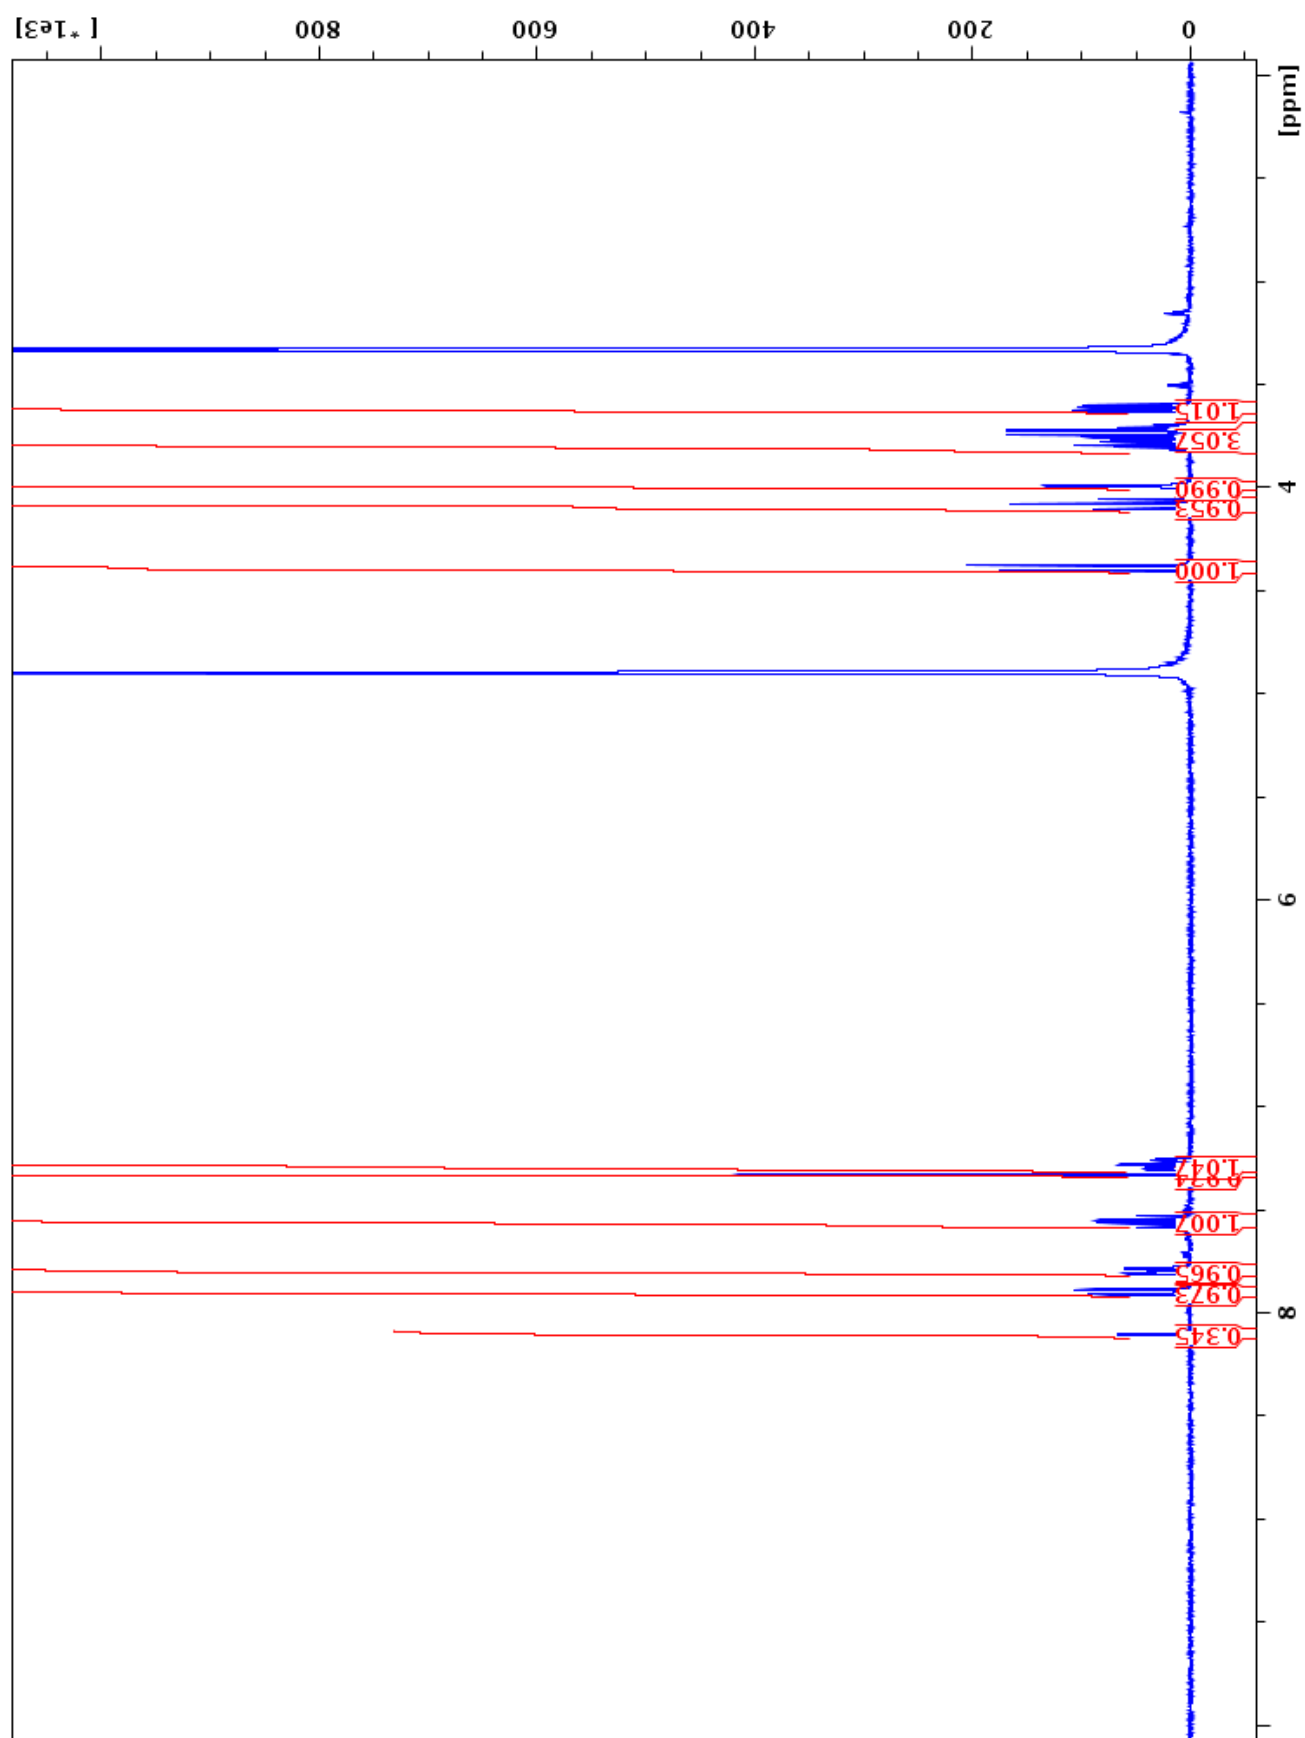

**2i:** 2-(3-fluorophenyl)-5-(1-deoxy- $\beta$ -D-galactopranosyl)oxazole

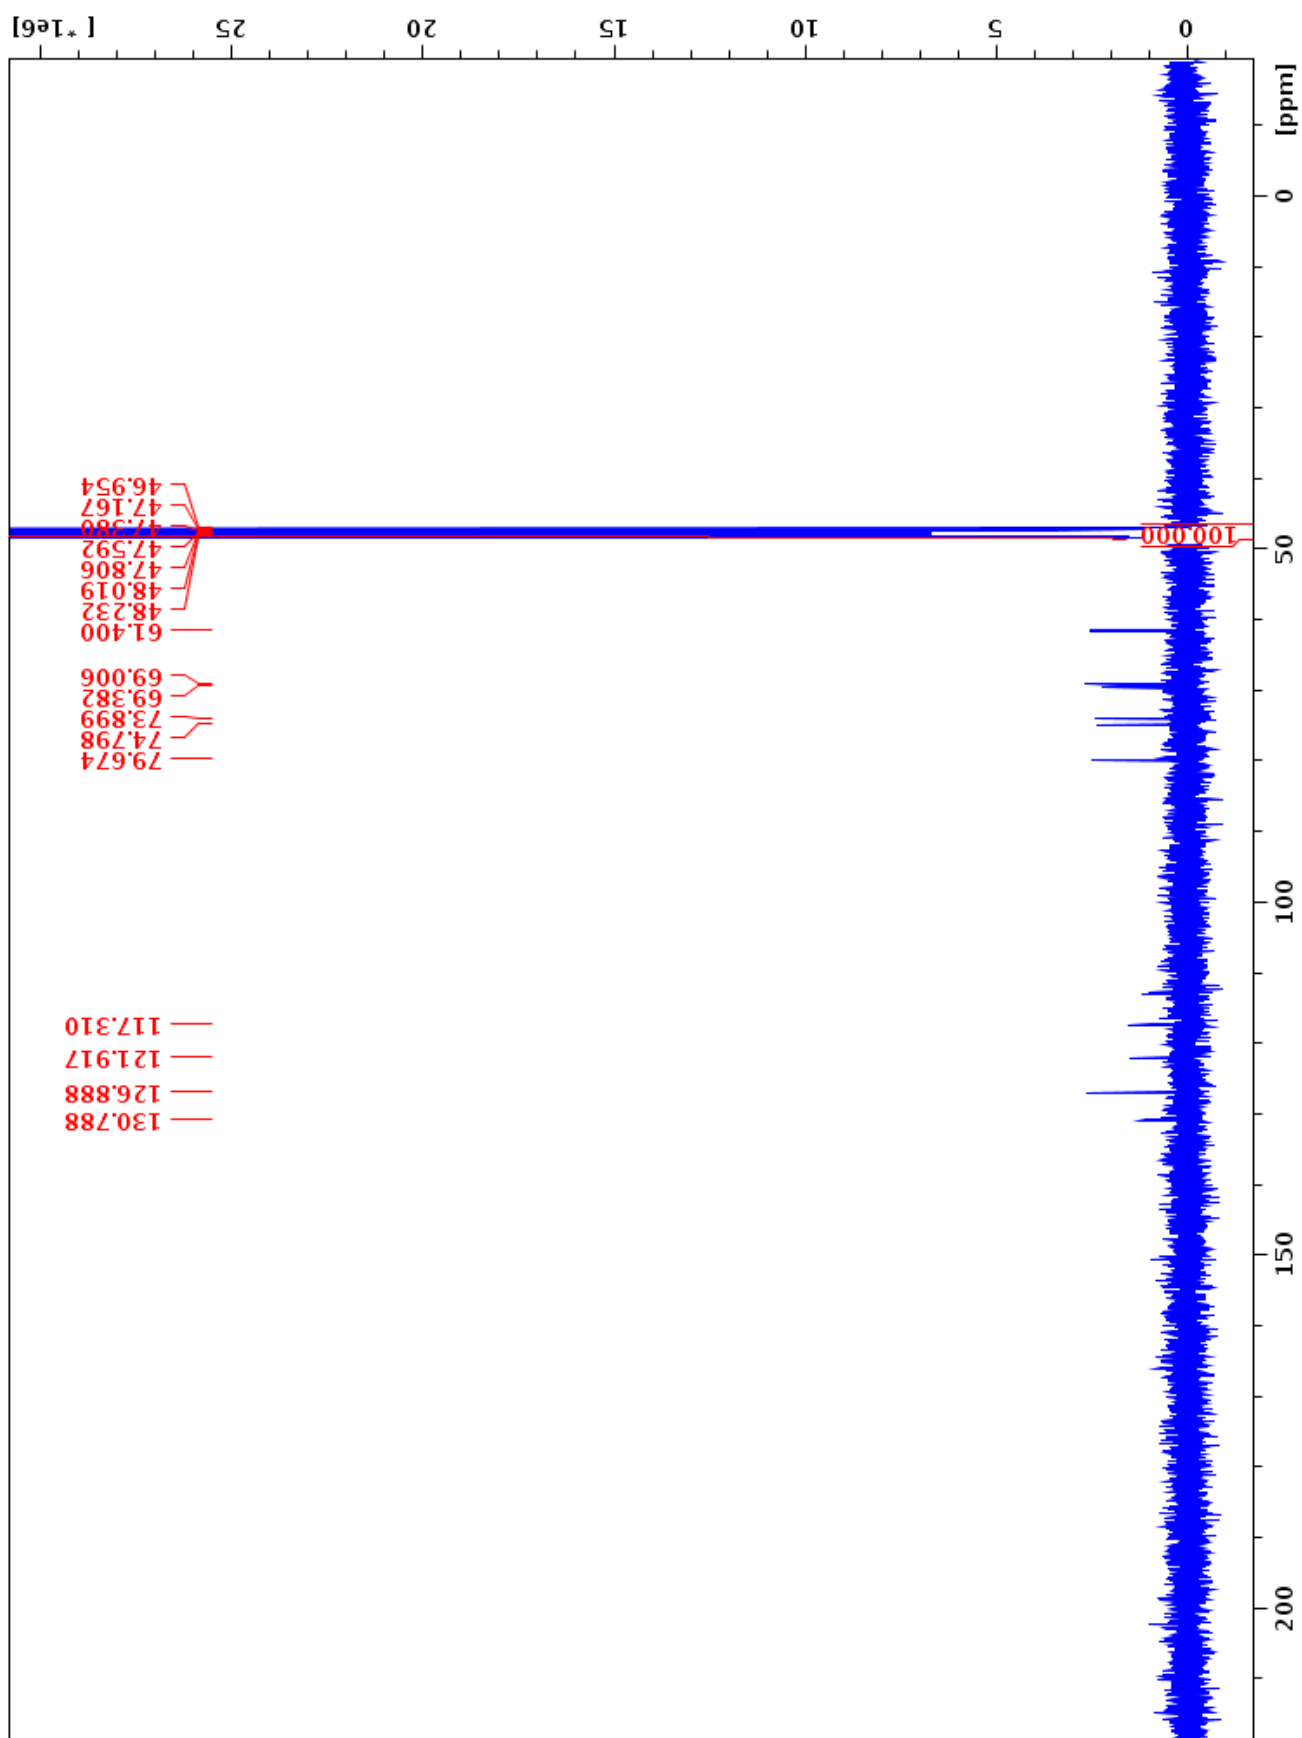

**3a:** 3-phenyl-5-(1-deoxy-  $\beta$ -D-galactopyranosyl)isoxazole

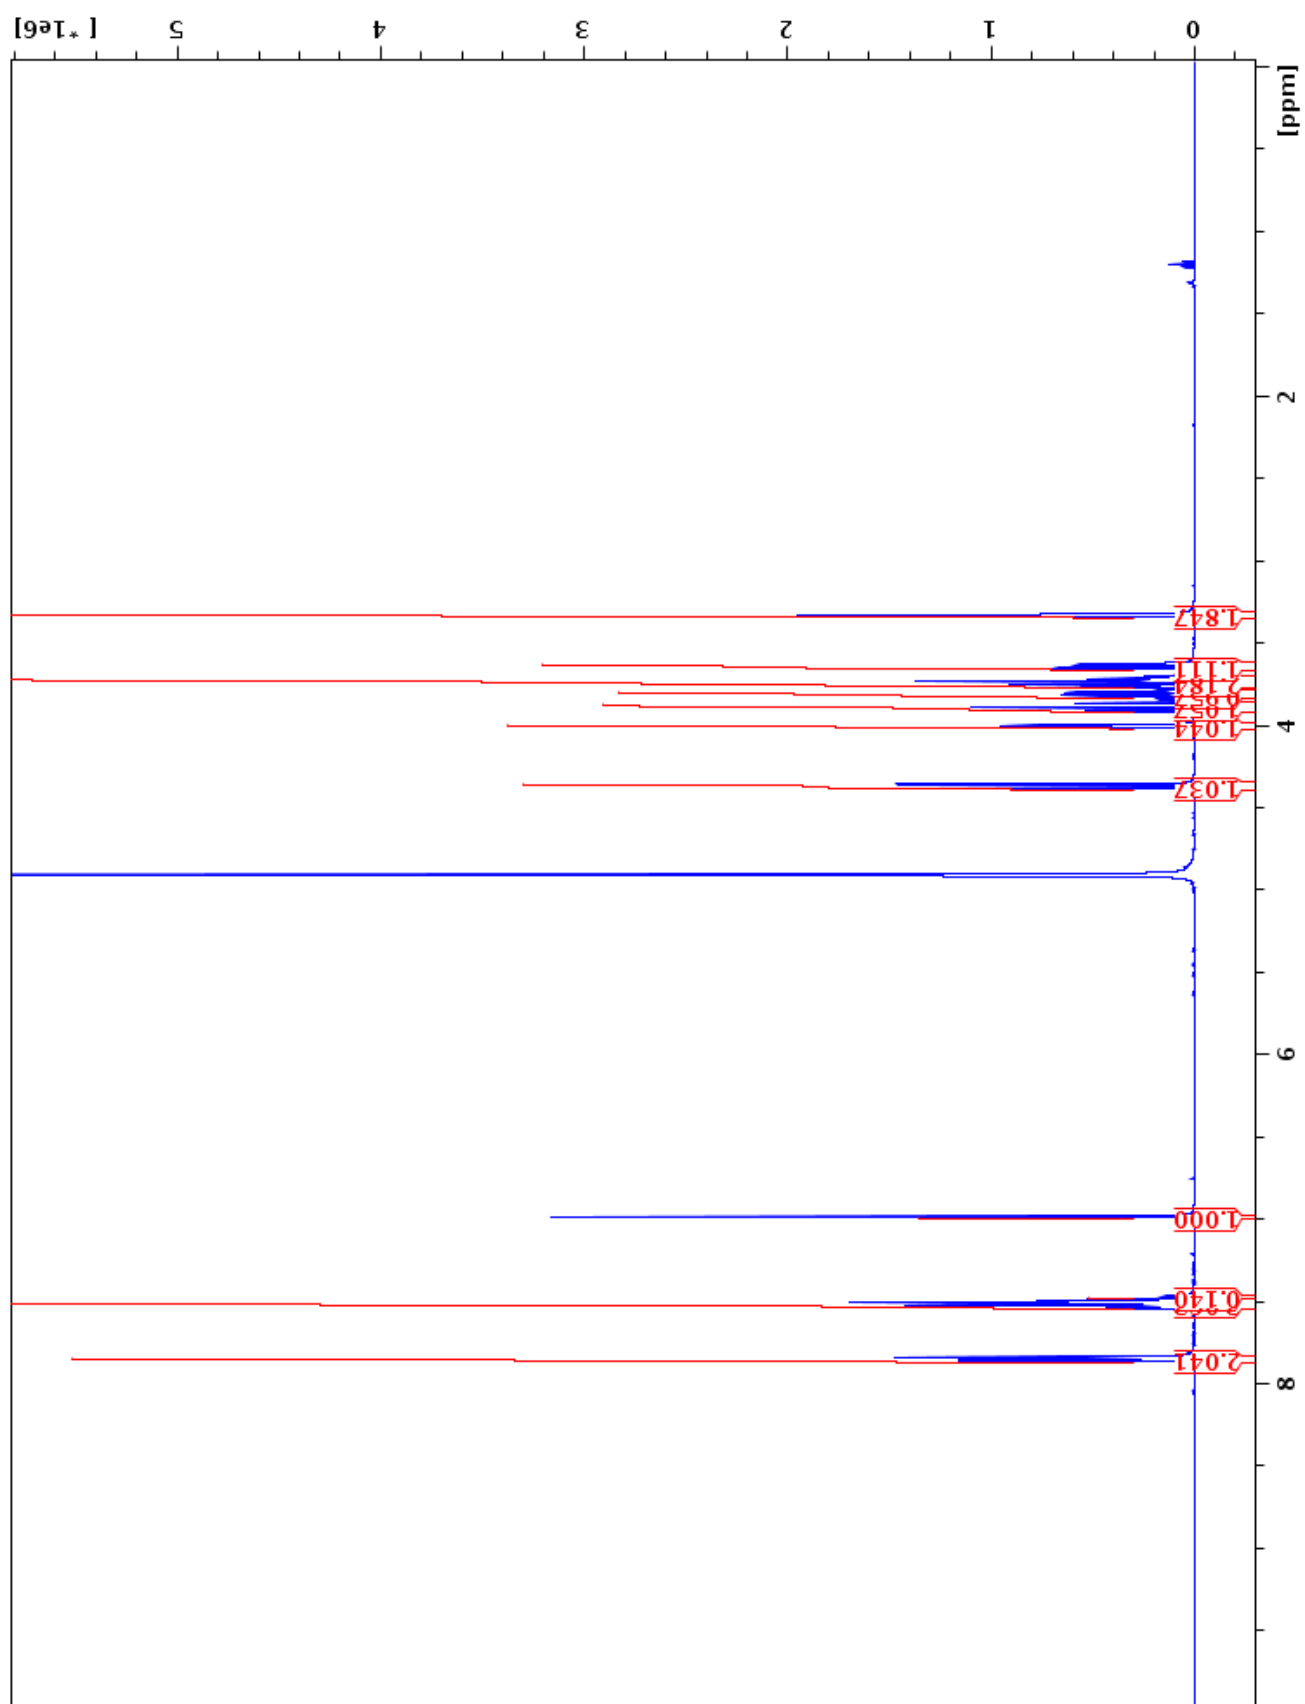

**3a:** 3-phenyl-5-(1-deoxy-  $\beta$ -D-galactopyranosyl)isoxazole

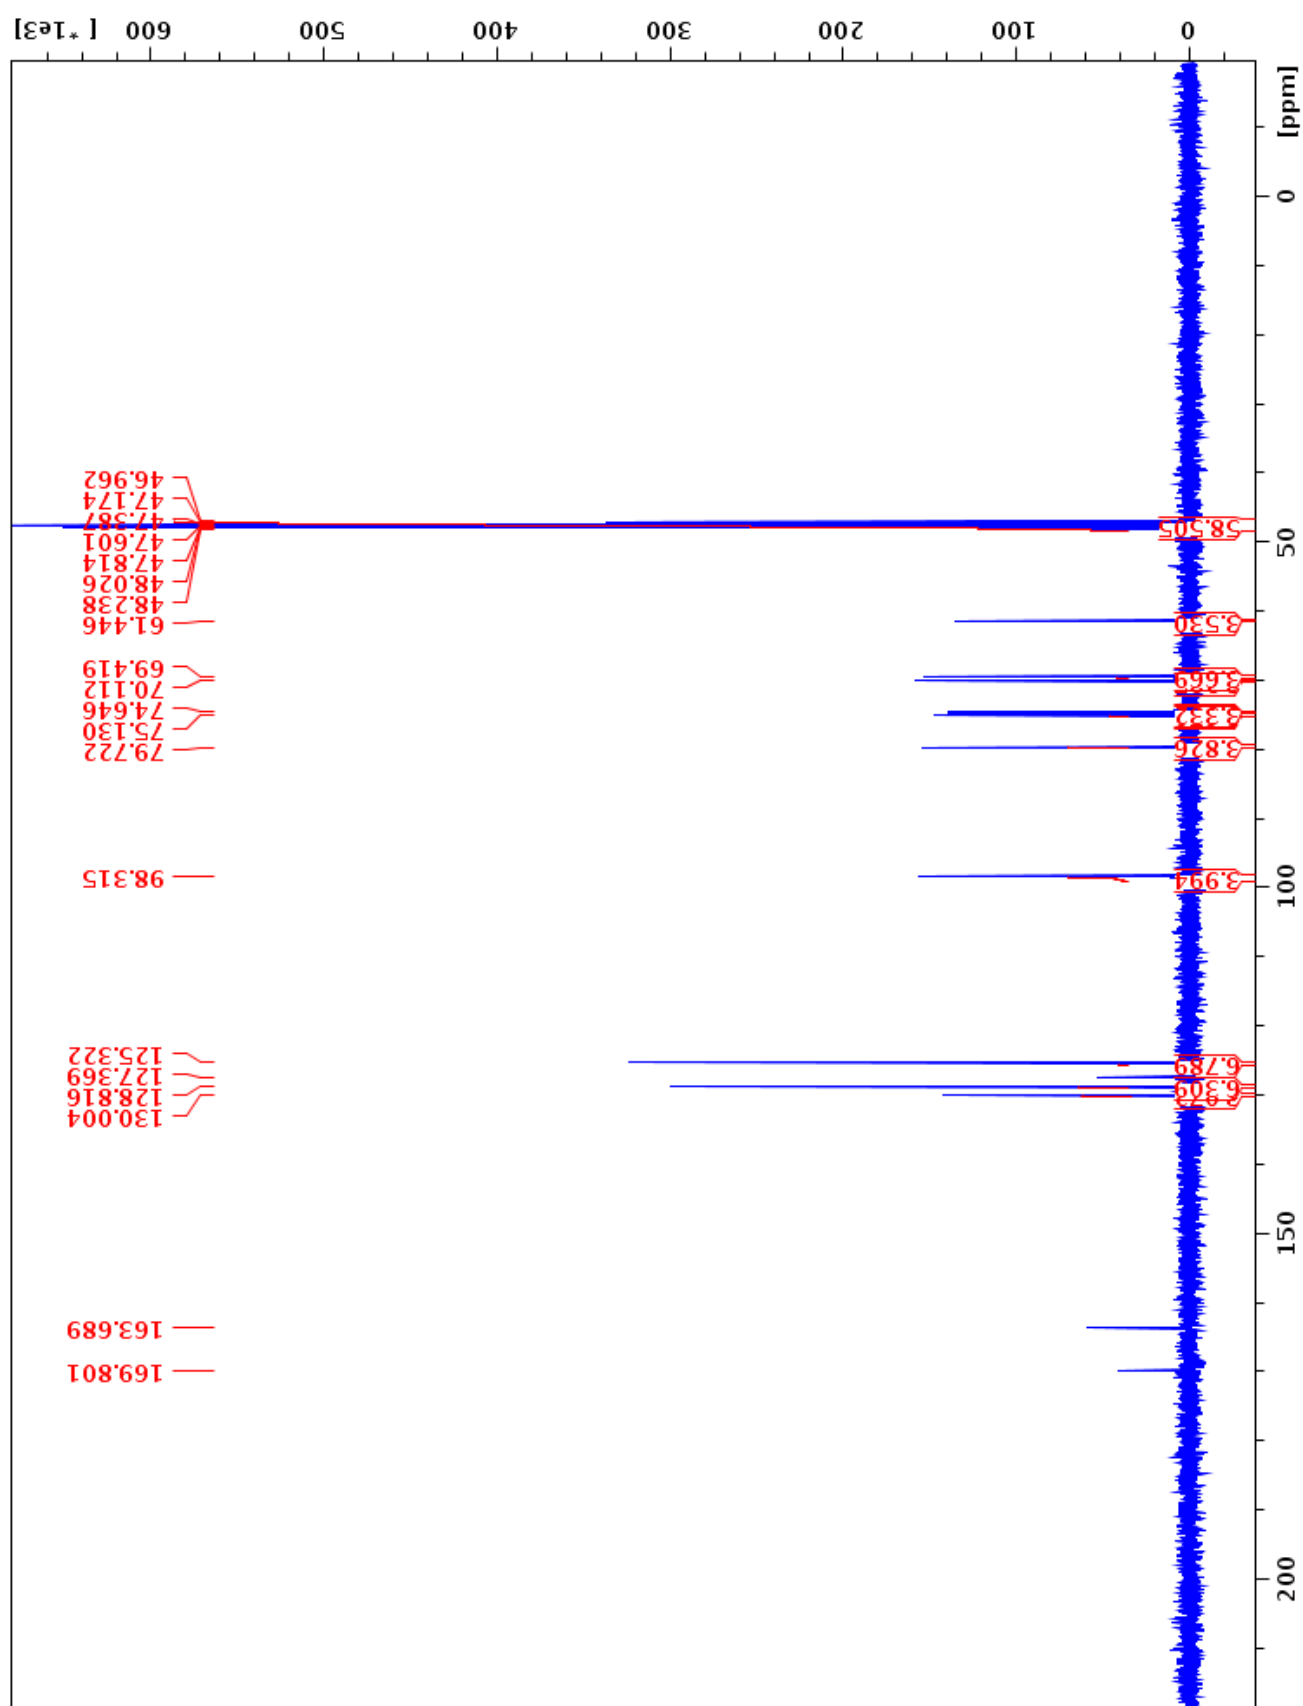

**3b:** 3-naphth-1-yl-(1-deoxy-  $\beta$ -D-galactopyranosyl)isoxazole

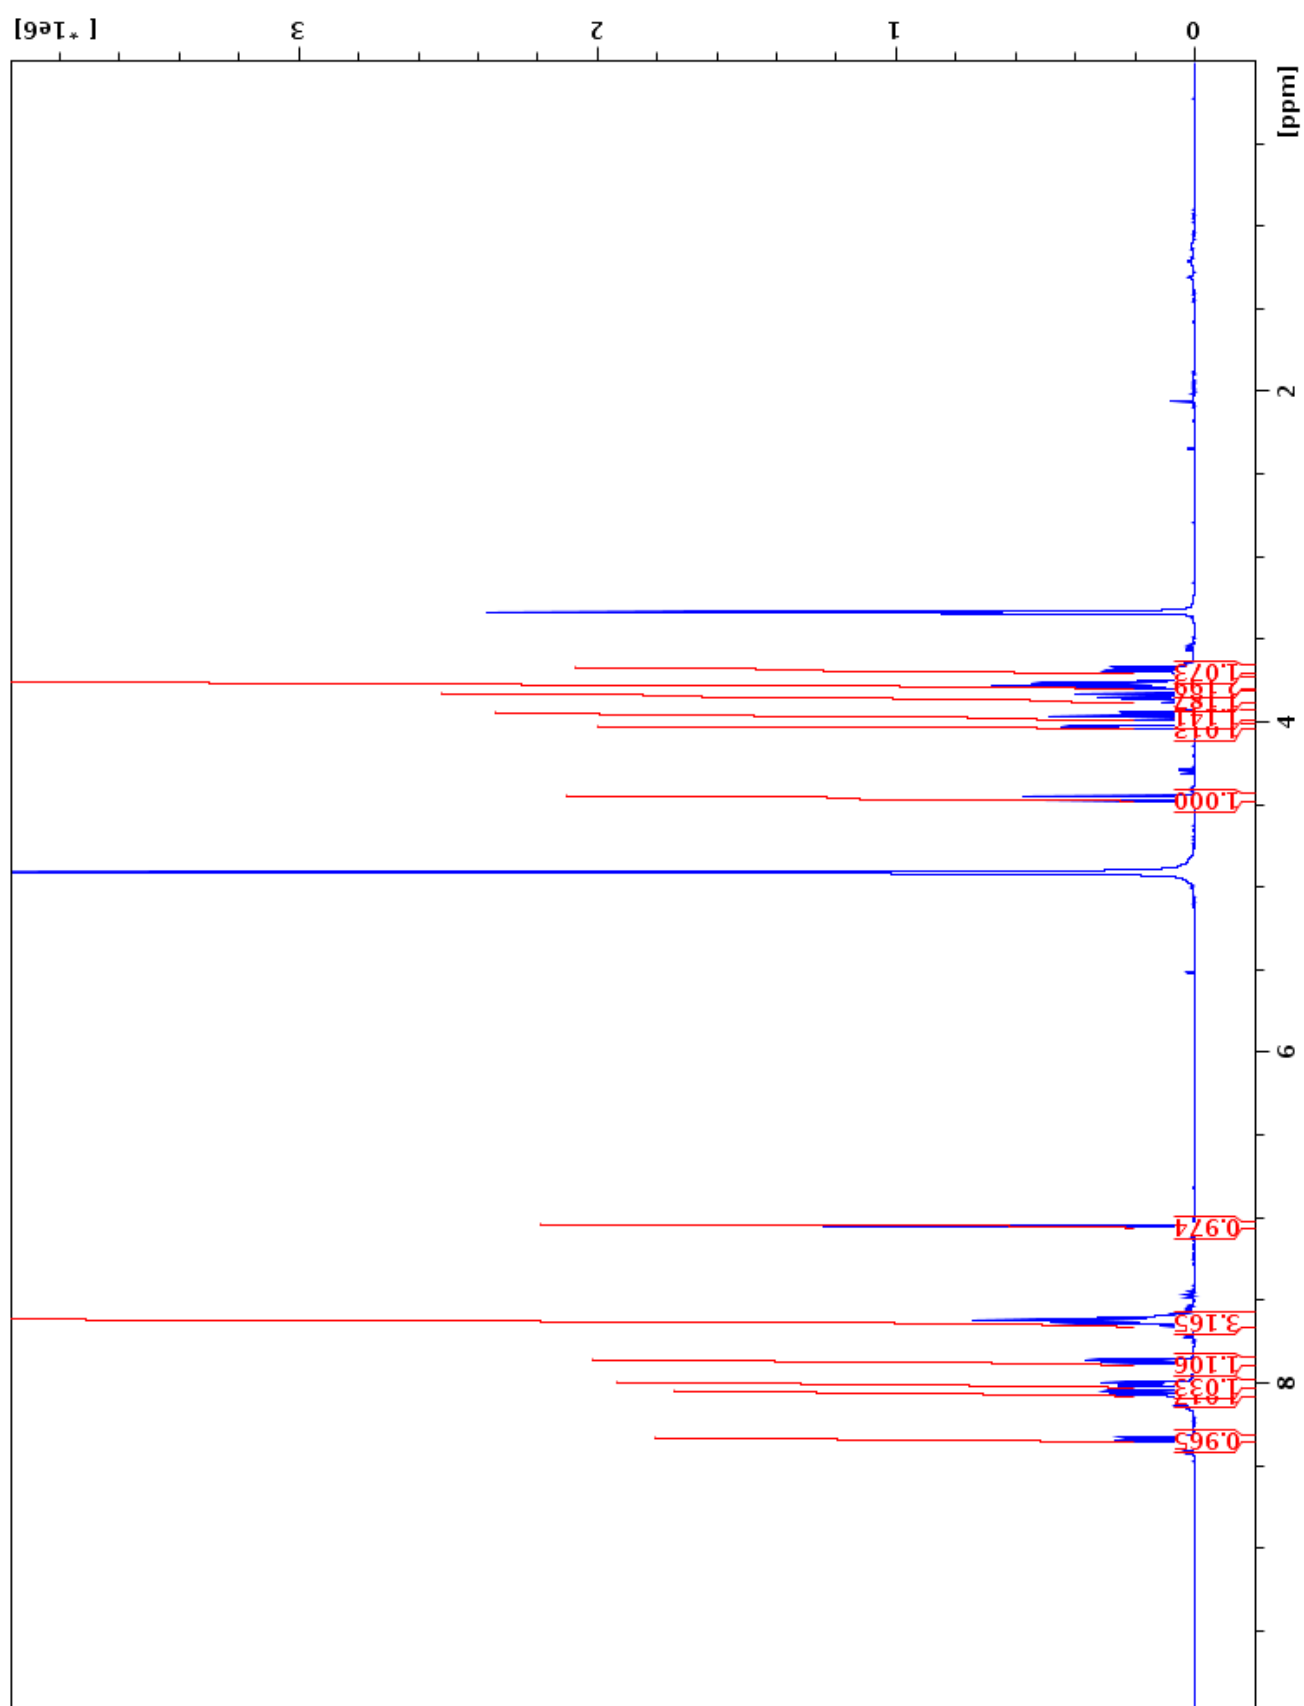

**3b:** 3-naphth-1-yl-5-(1-deoxy-  $\beta$ -D-galactopyranosyl)isoxazole

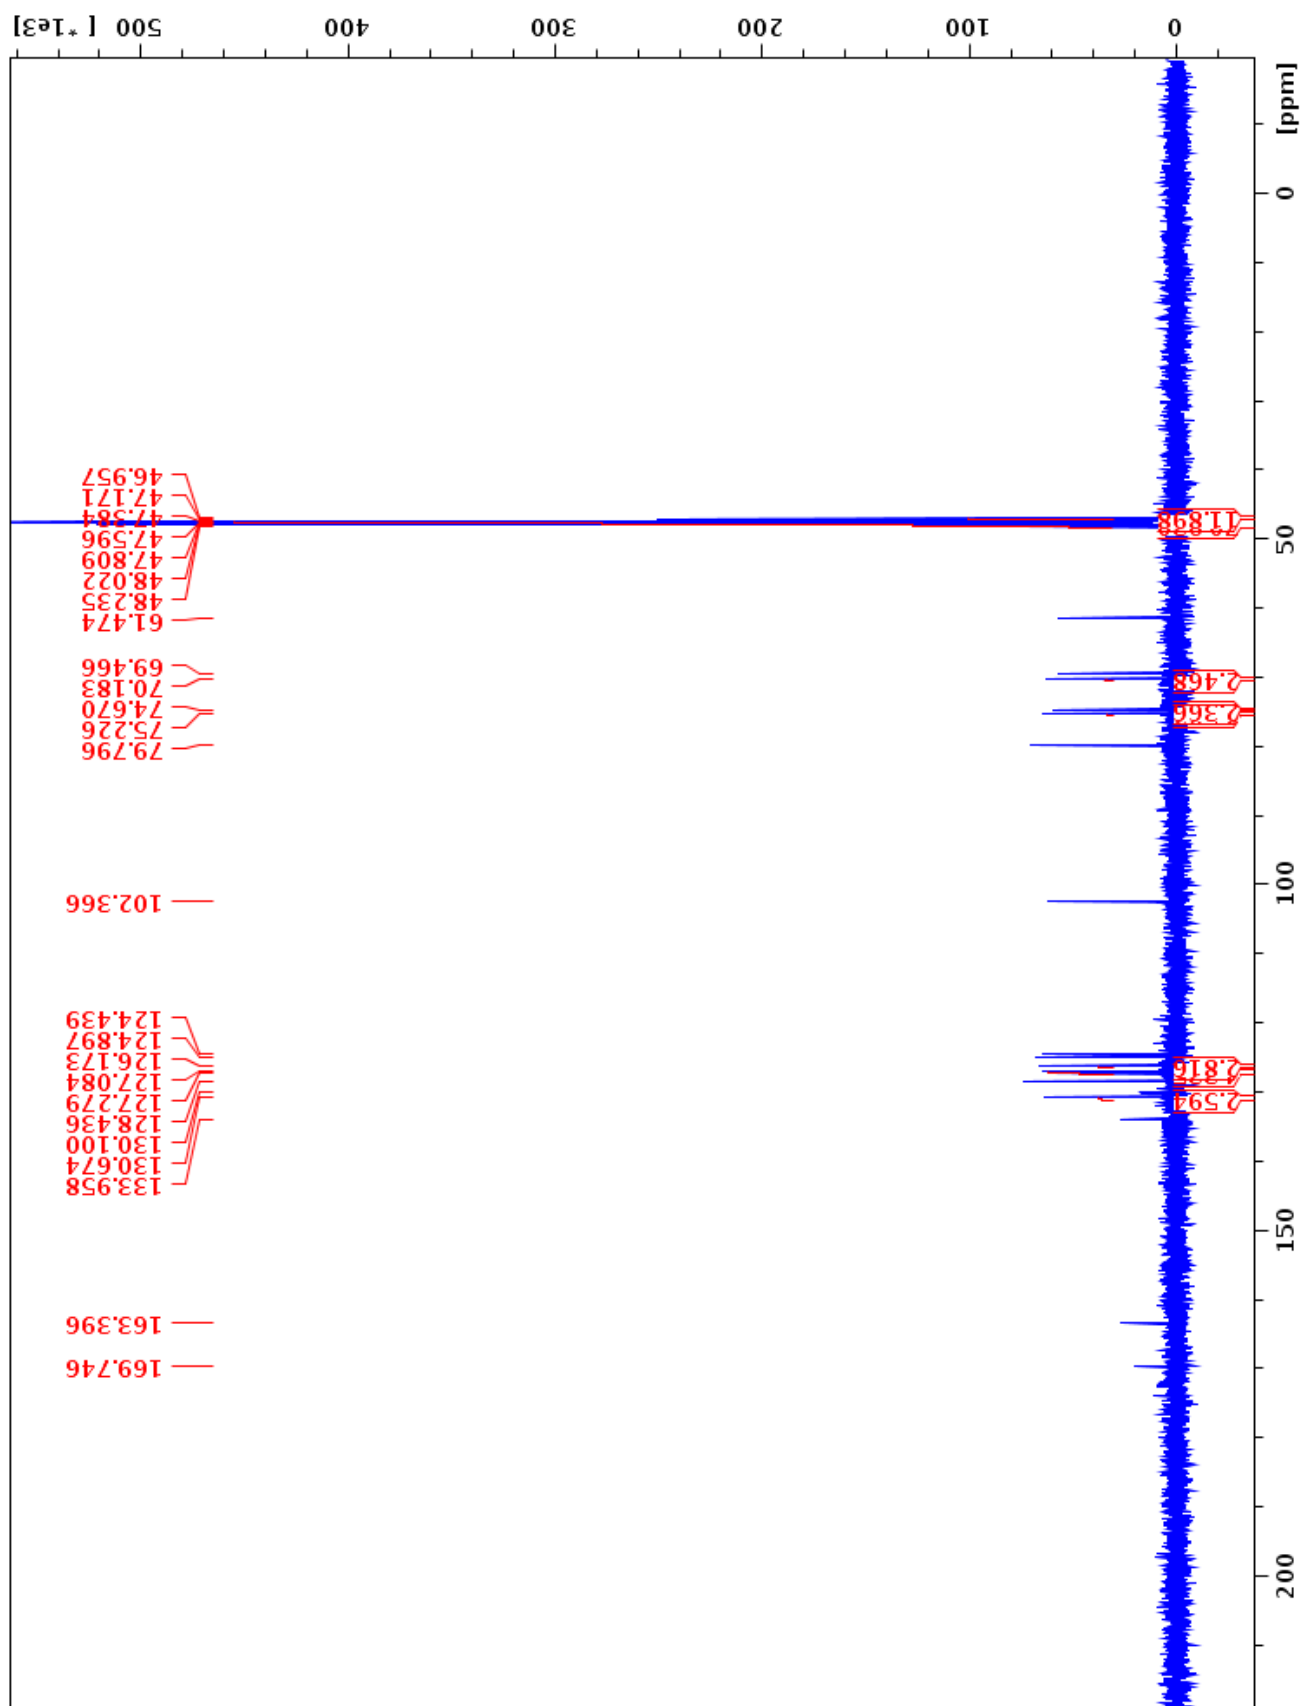

**3c:** 3-naphth-2-yl-5-(1-deoxy-  $\beta$ -D-galactopyranosyl)isoxazole

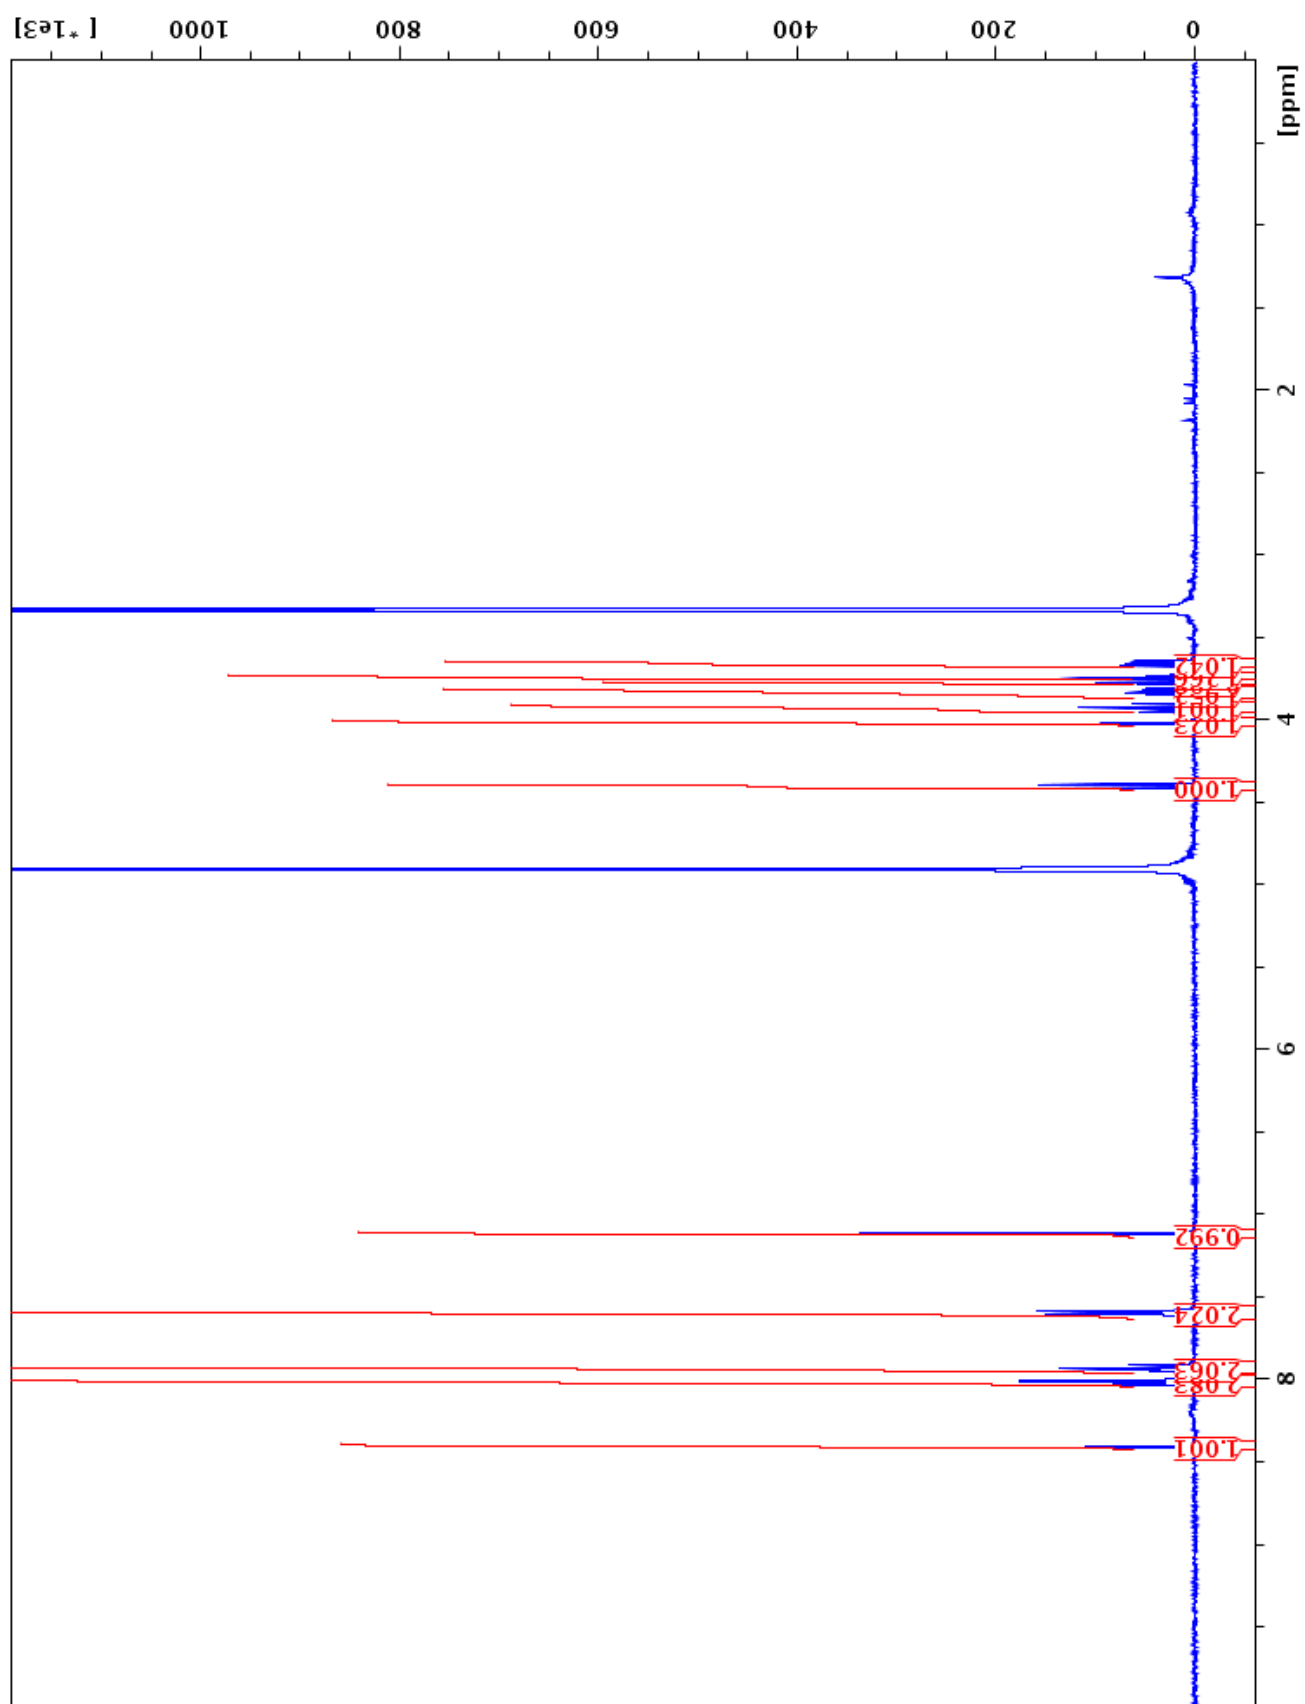

**3c:** 3-naphth-2-yl-5-(1-deoxy-  $\beta$ -D-galactopyranosyl)isoxazole

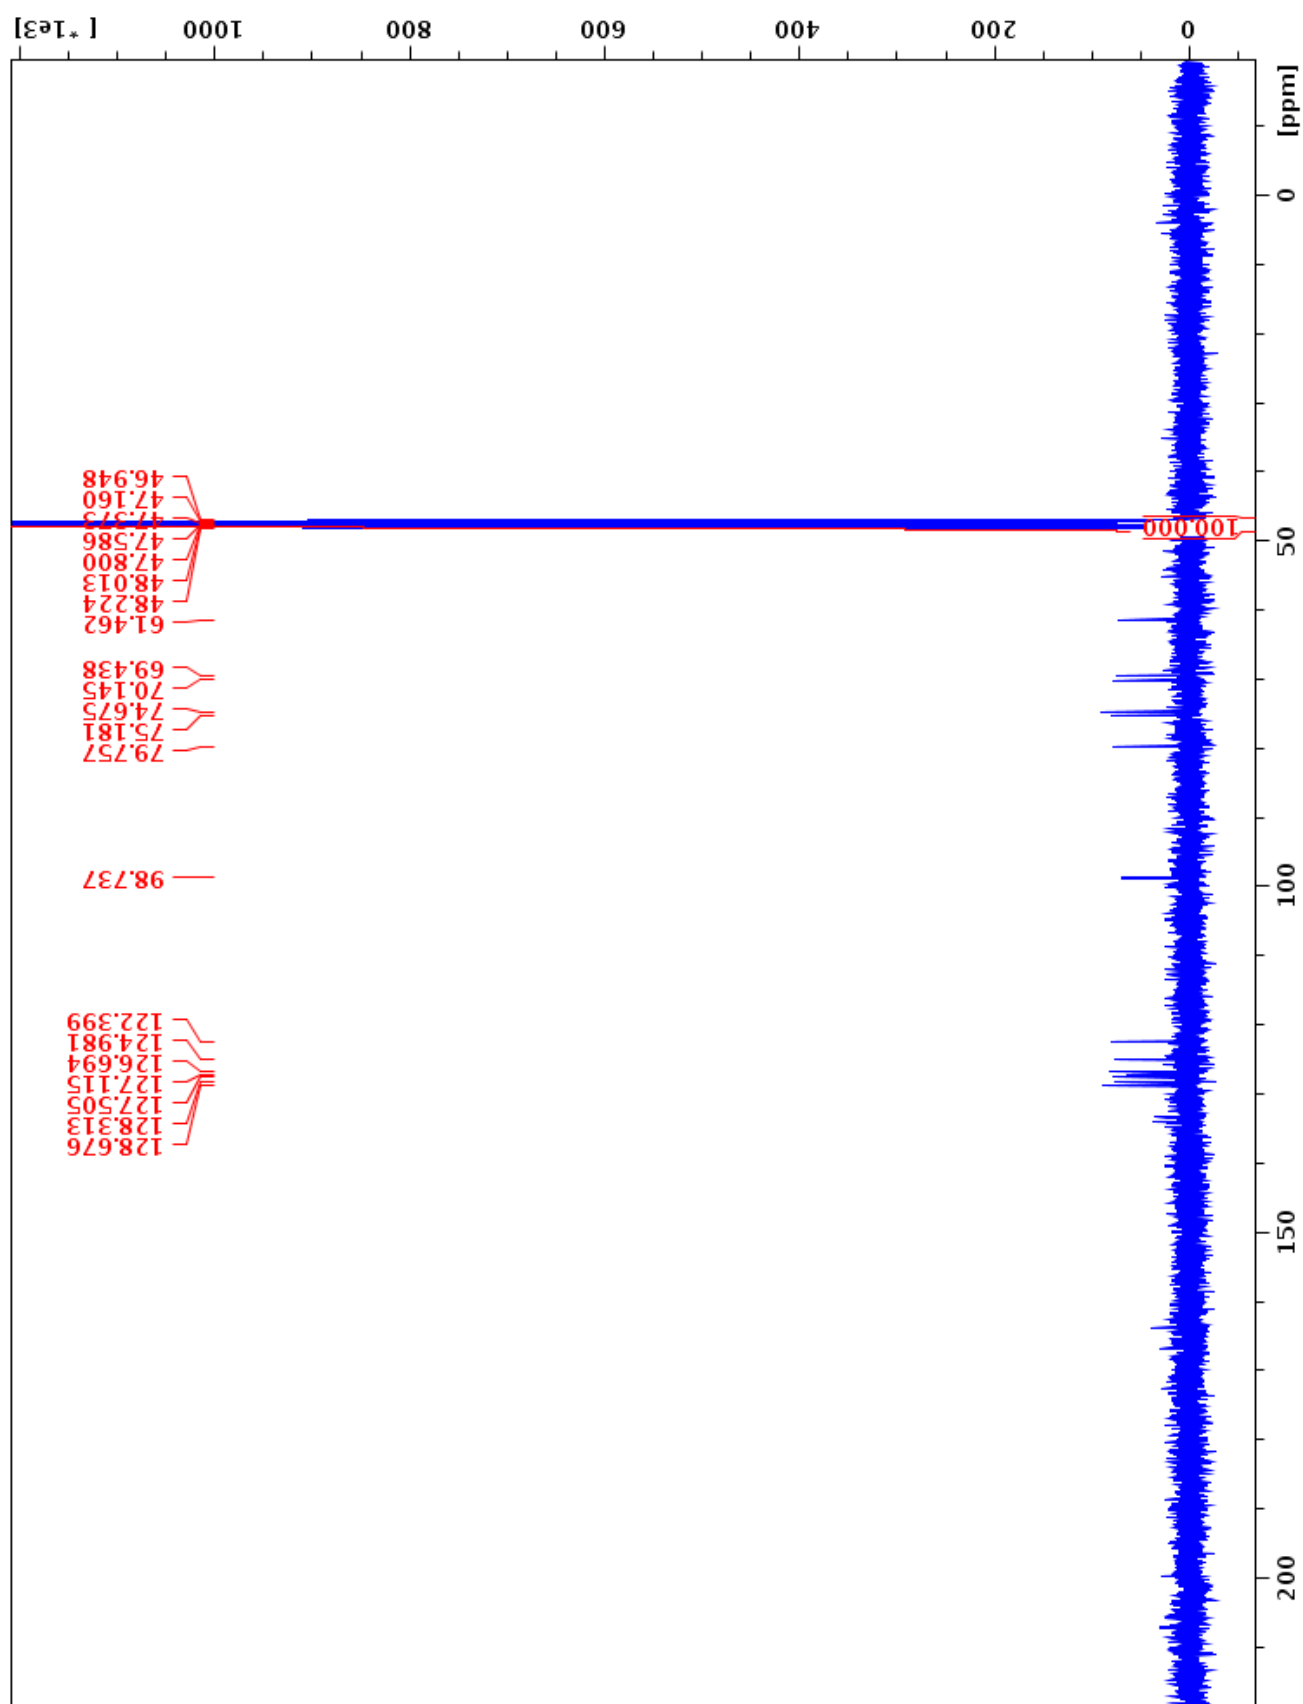



**4a:** 3-phenyl-5-(1-deoxy-  $\beta$ -D-galactopyranosyl)-1H-pyrazole

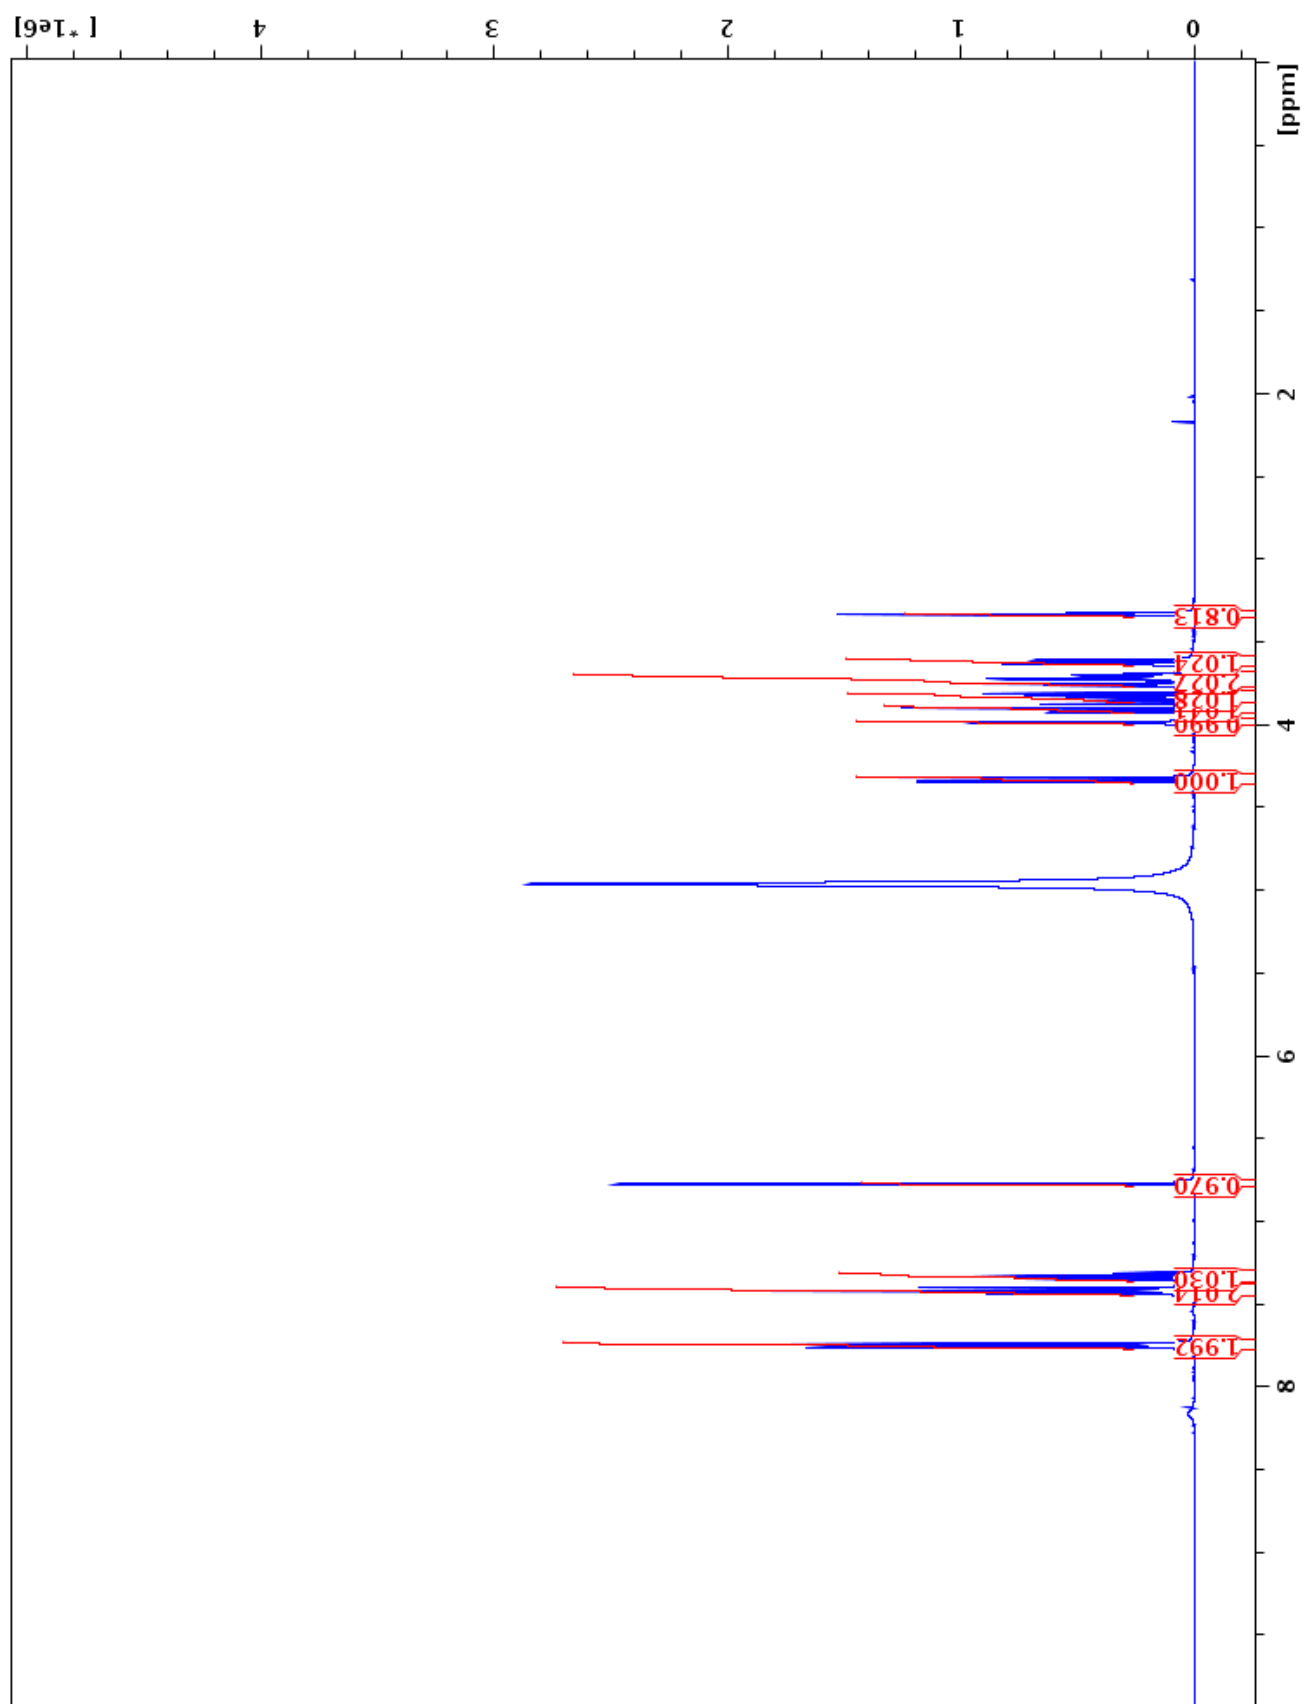

**4a:** 3-phenyl-5-(1-deoxy-  $\beta$ -D-galactopyranosyl)-1H-pyrazole

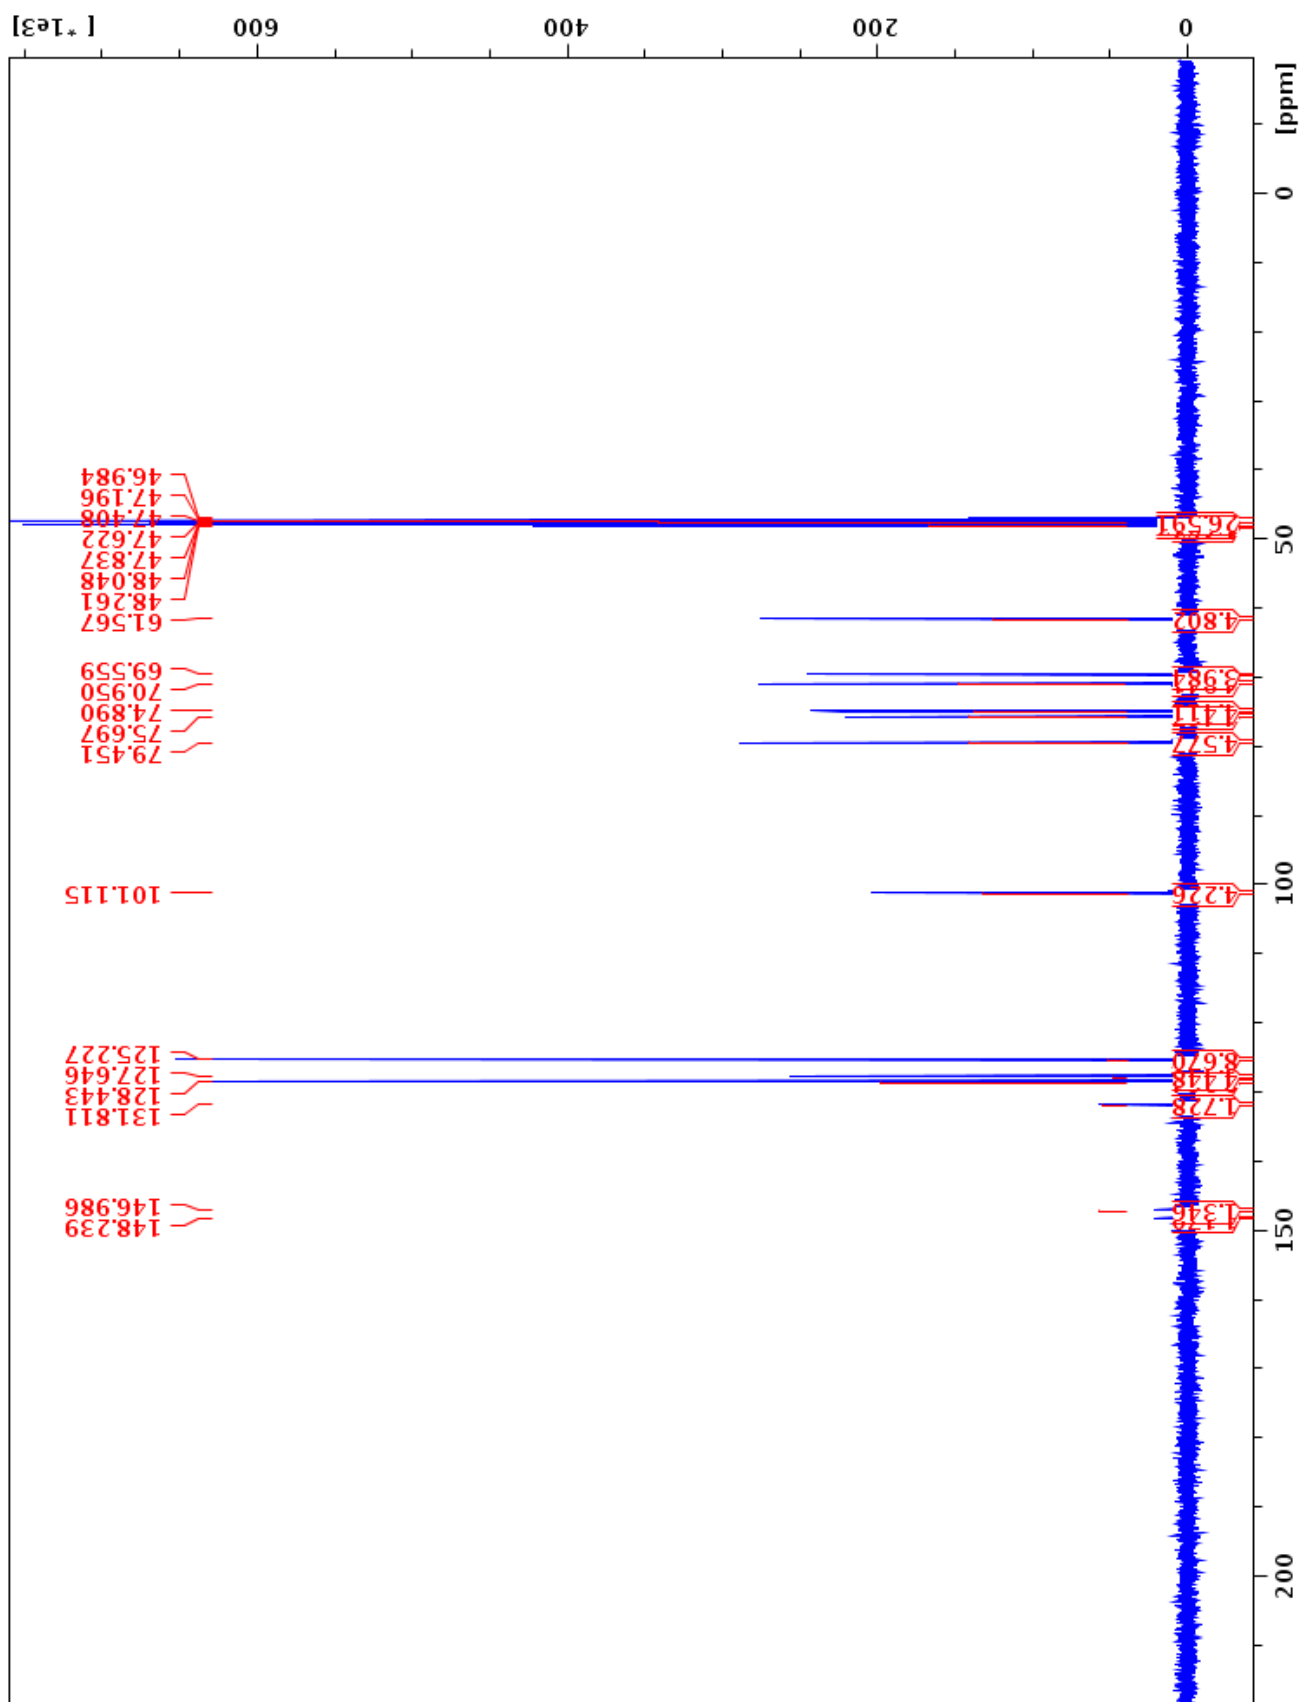

**4b:** 3-naphth-1-yl-5-(1-deoxy-  $\beta$ -D-galactopyranosyl)-1H-pyrazole

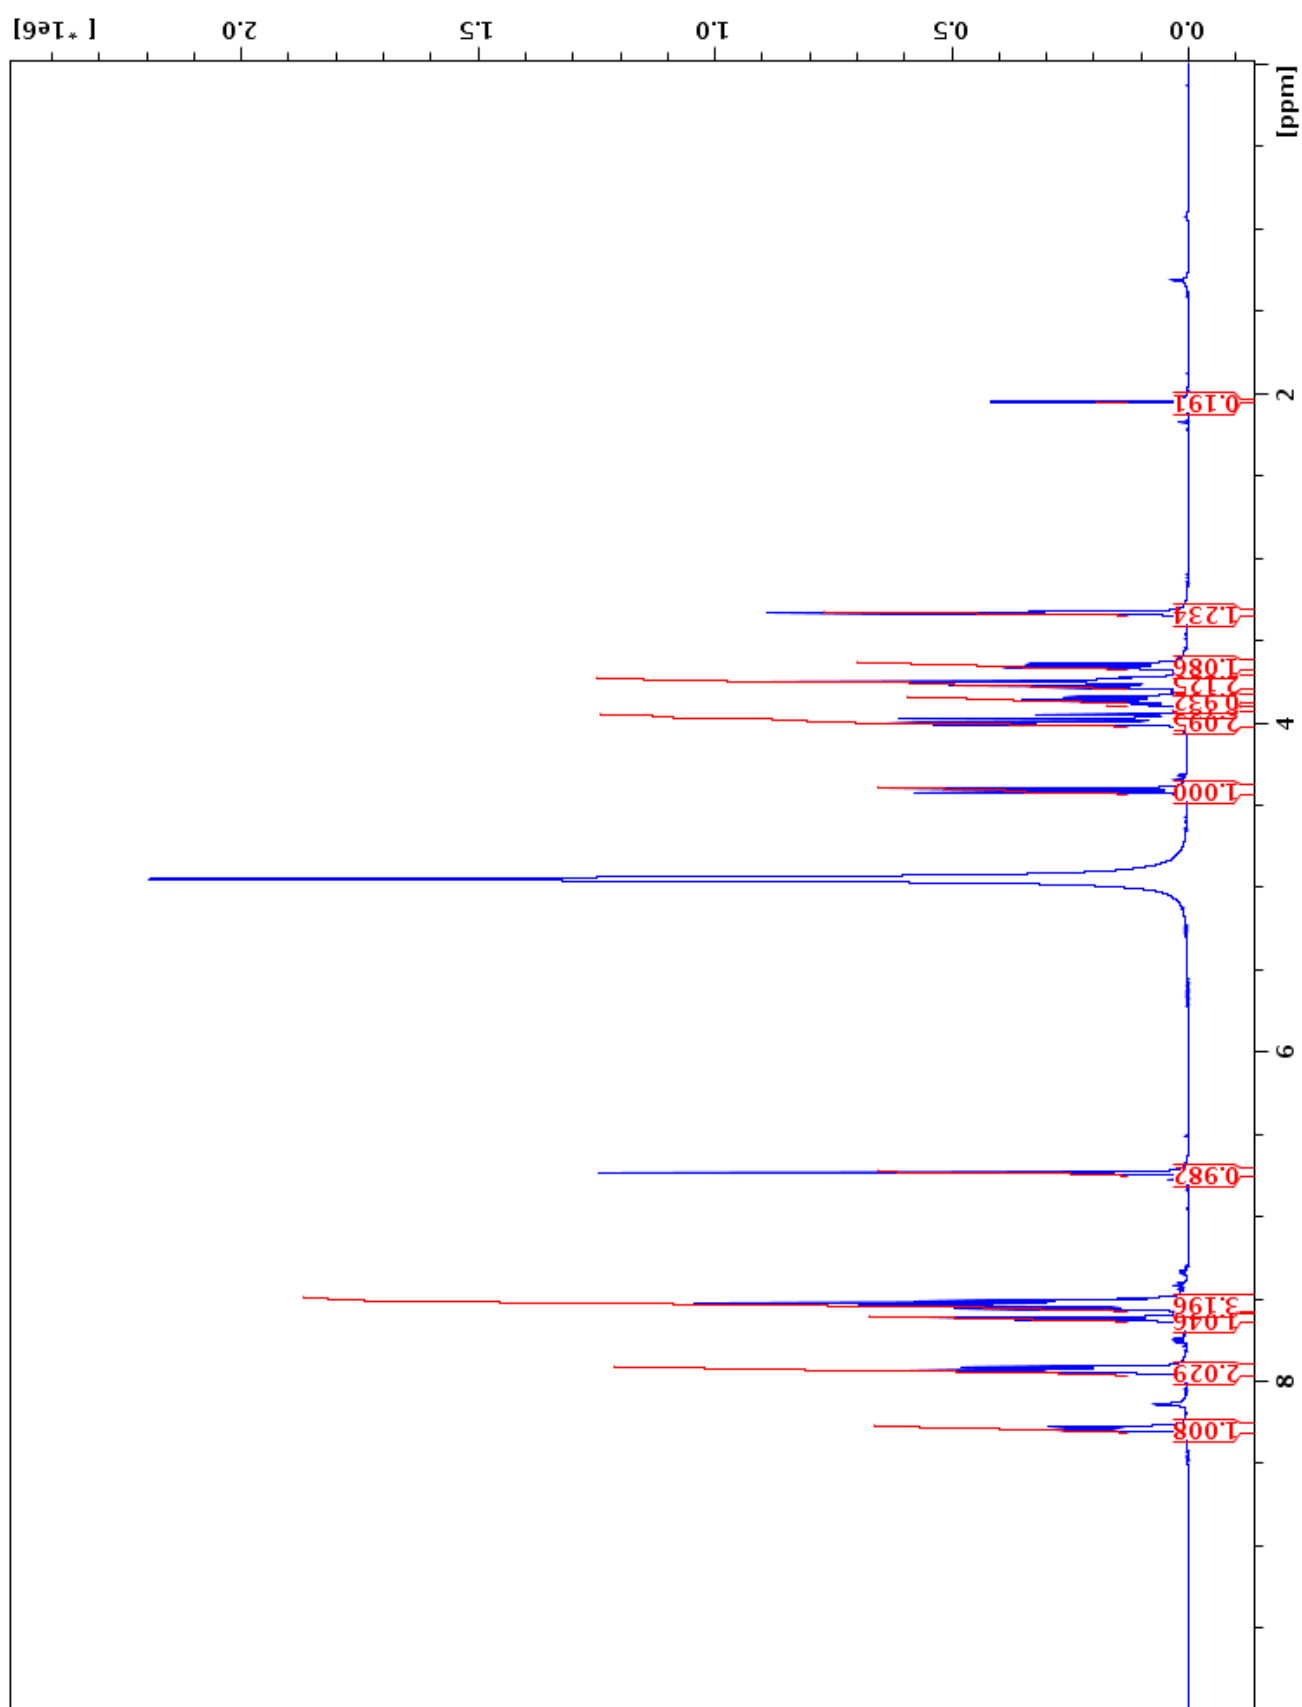

**4b:** 3-naphth-1-yl-5-(1-deoxy-  $\beta$ -D-galactopyranosyl)-1H-pyrazole

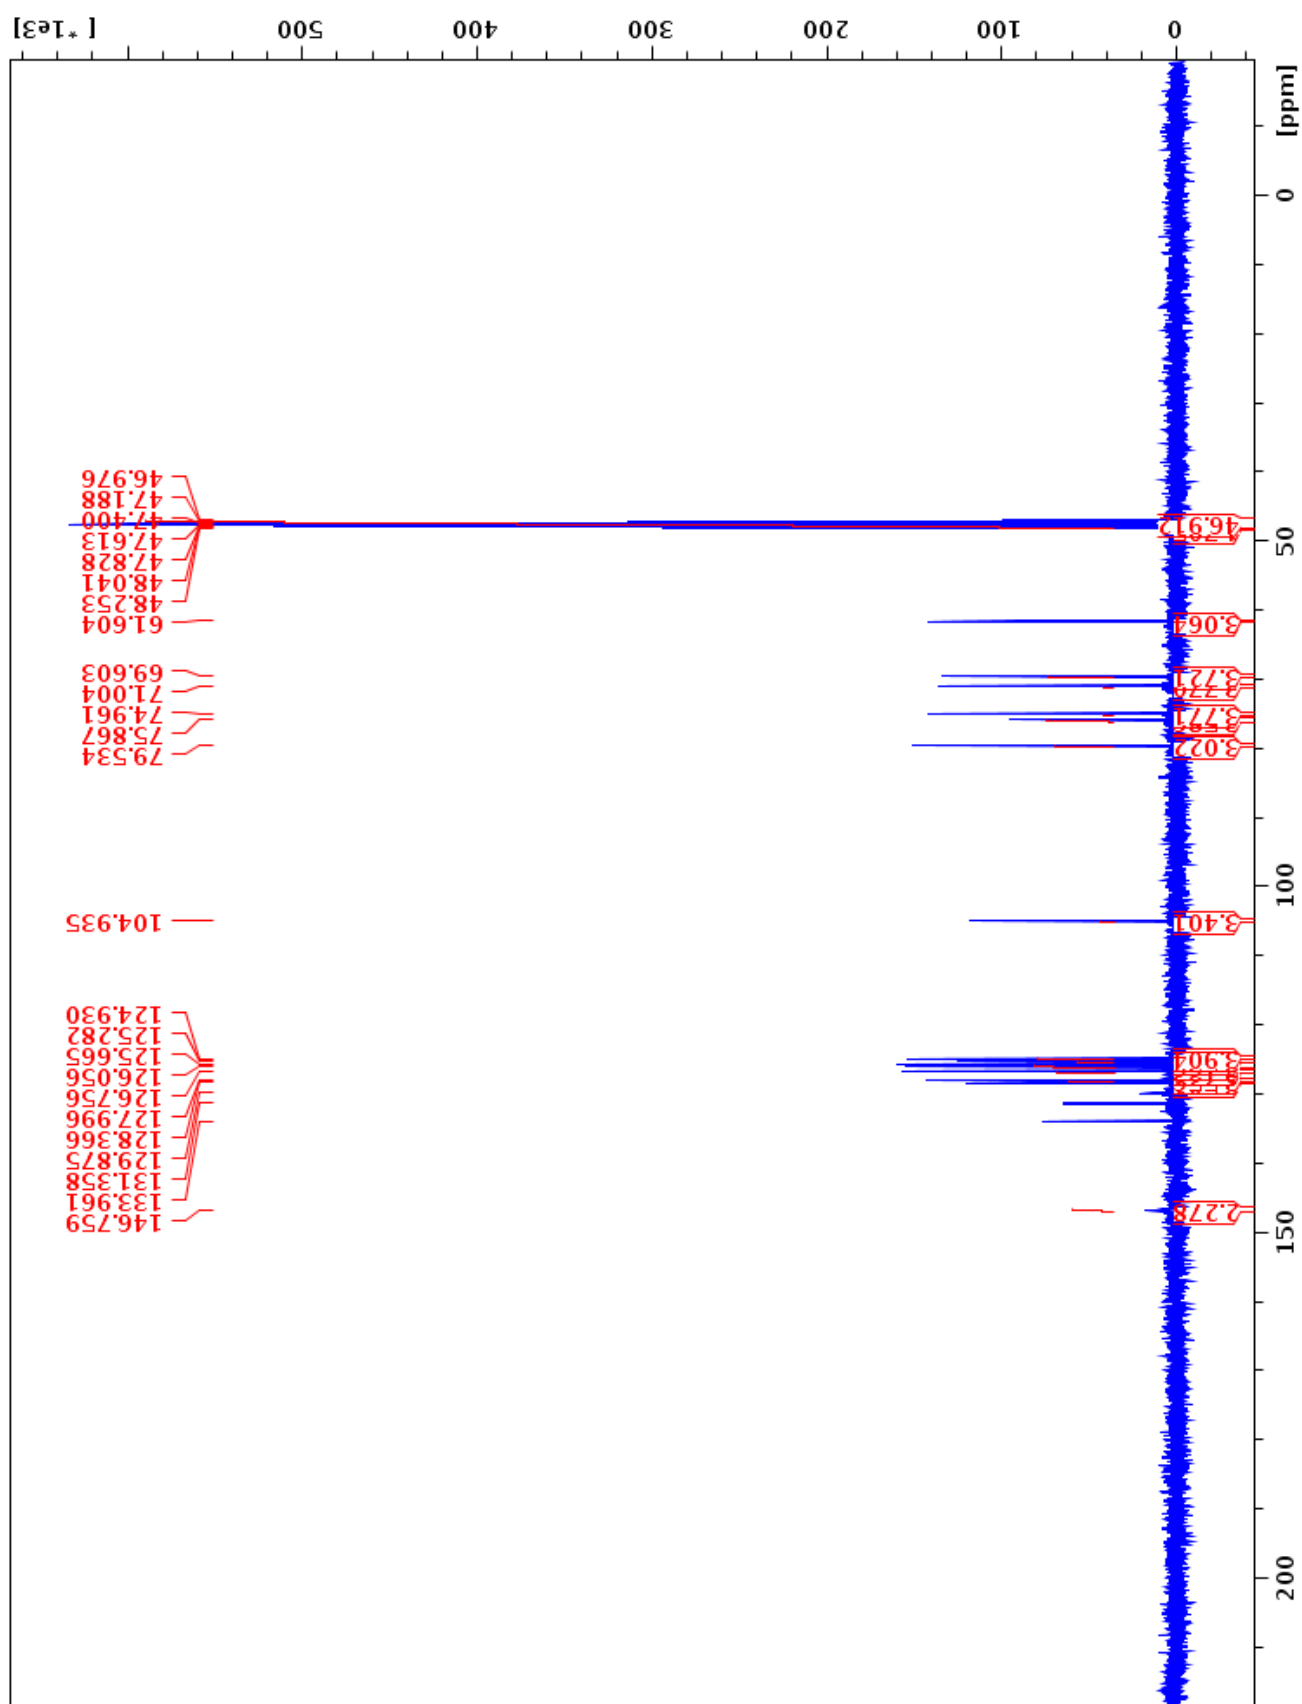

**4c:** 3-naphth-2-yl-5-(1-deoxy-  $\beta$ -D-galactopyranosyl)-1H-pyrazole

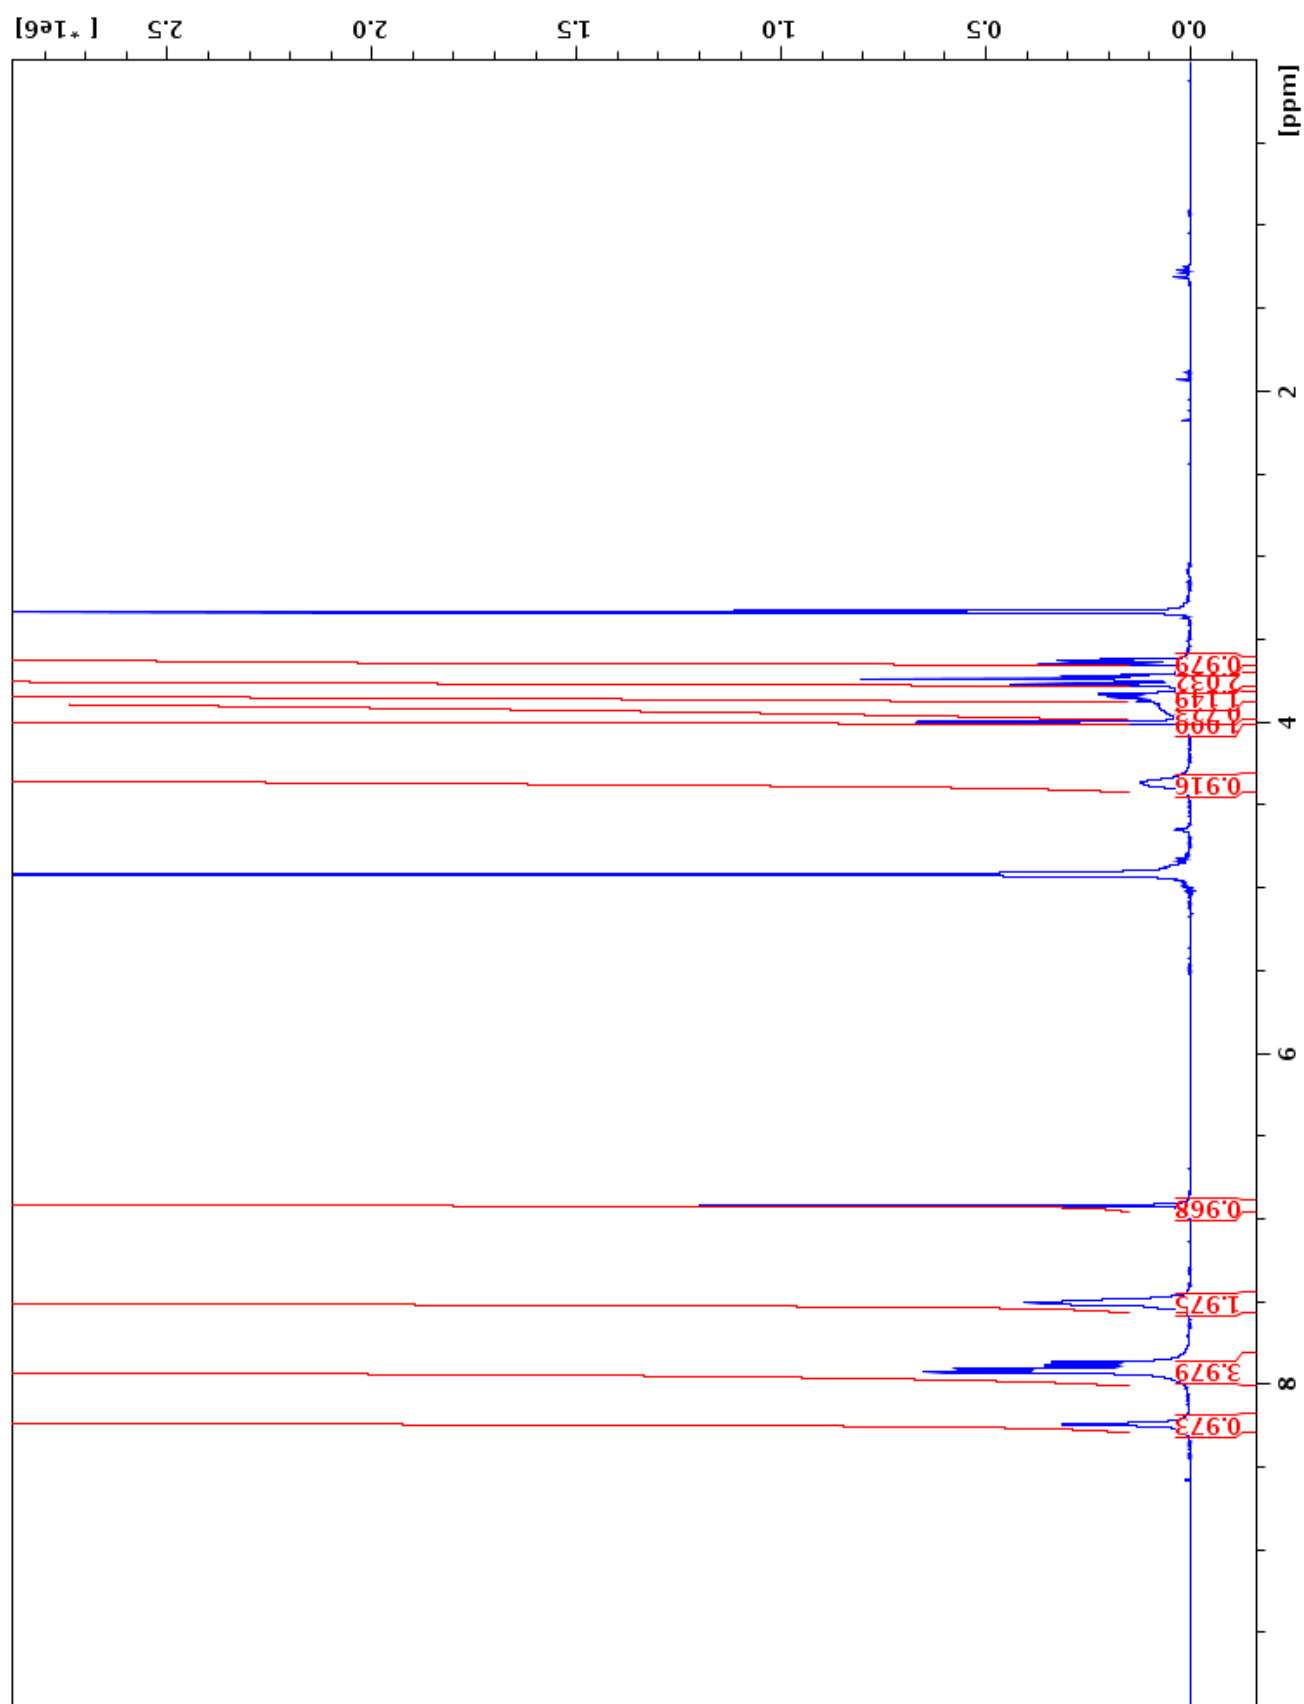

**4c:** 3-naphth-2-yl-5-(1-deoxy-  $\beta$ -D-galactopyranosyl)-1H-pyrazole

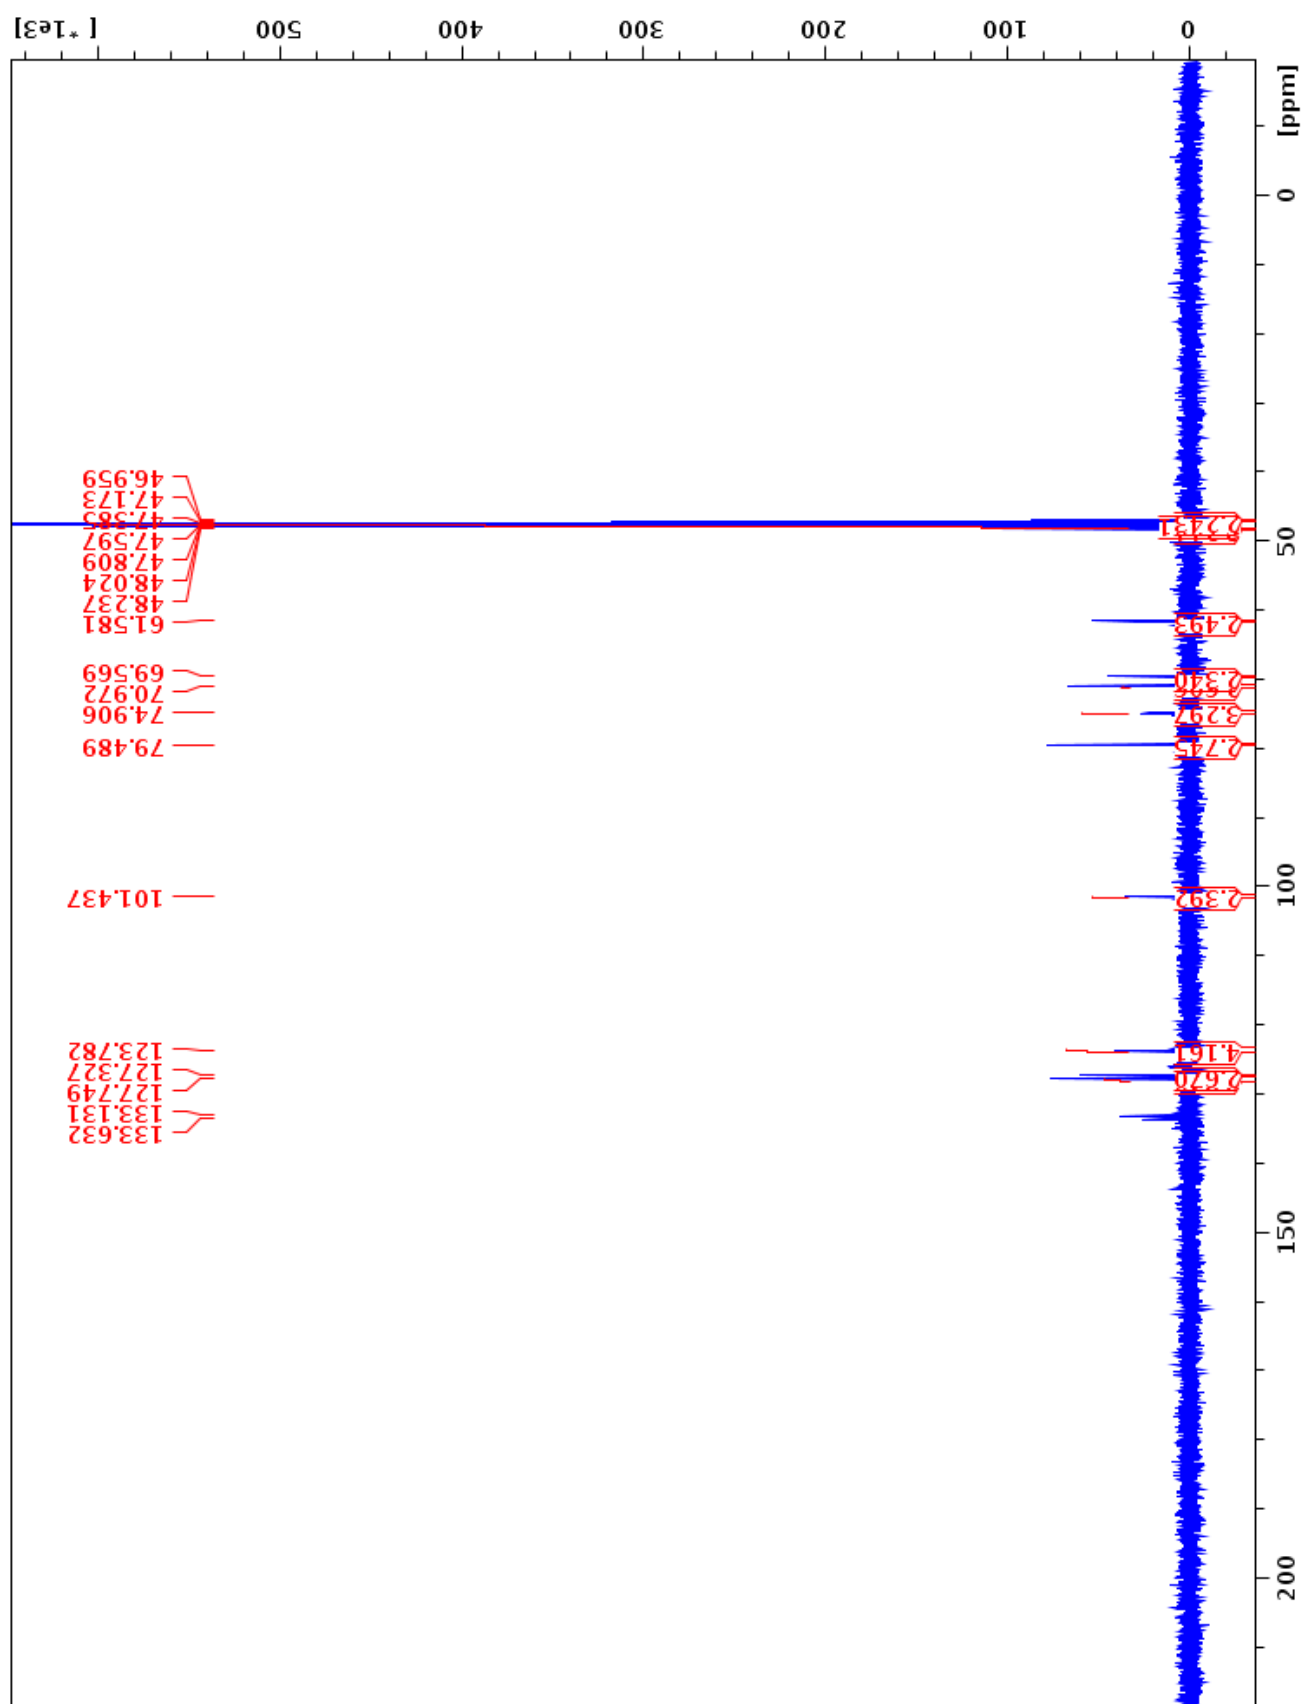

**9a:** 1-phenyl-3-(2,3,4,6-tetra-*O*-acetyl- $\beta$ -D-galactopyranosyl)-prop-2-yn-1-one

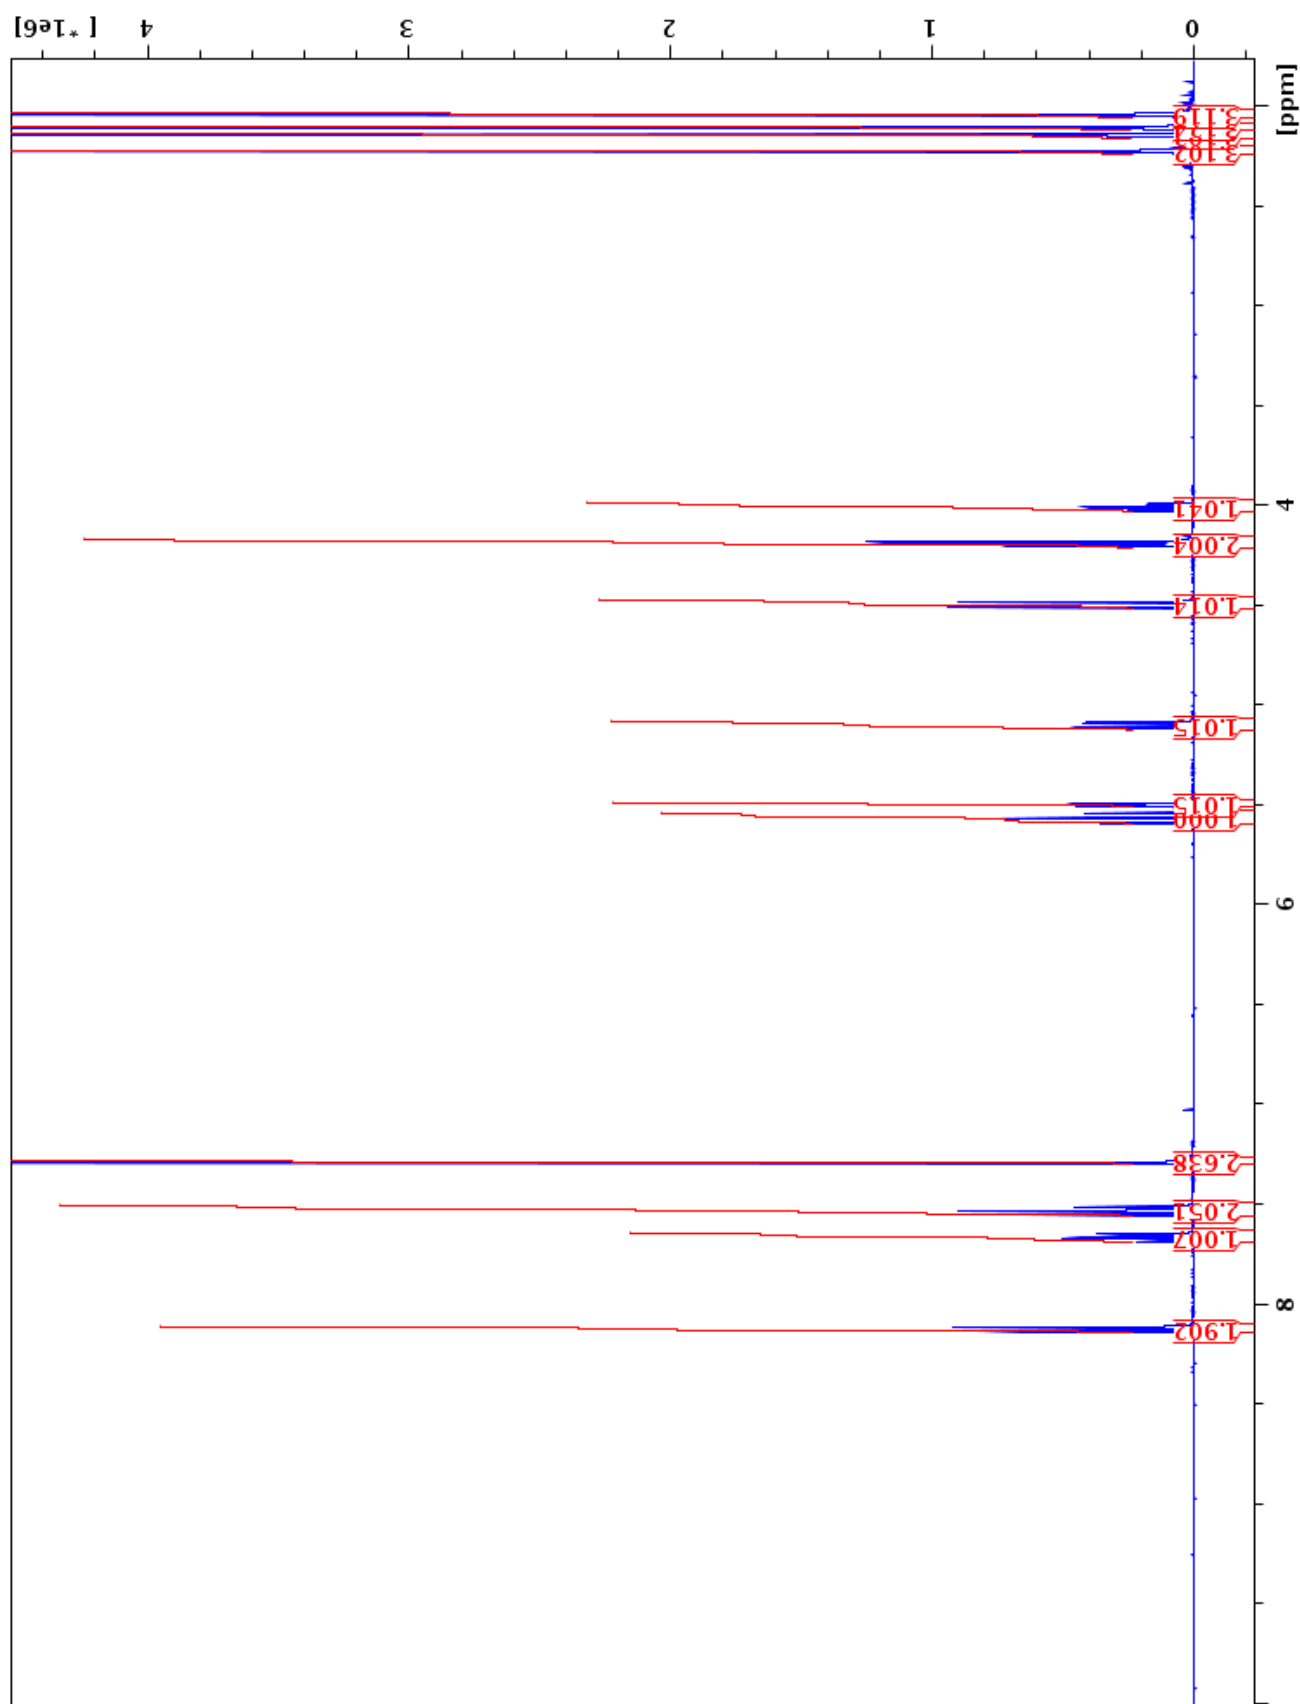

**9a:** 1-phenyl-3-(2,3,4,6-tetra-*O*-acetyl- $\beta$ -D-galactopyranosyl)-prop-2-yn-1-one

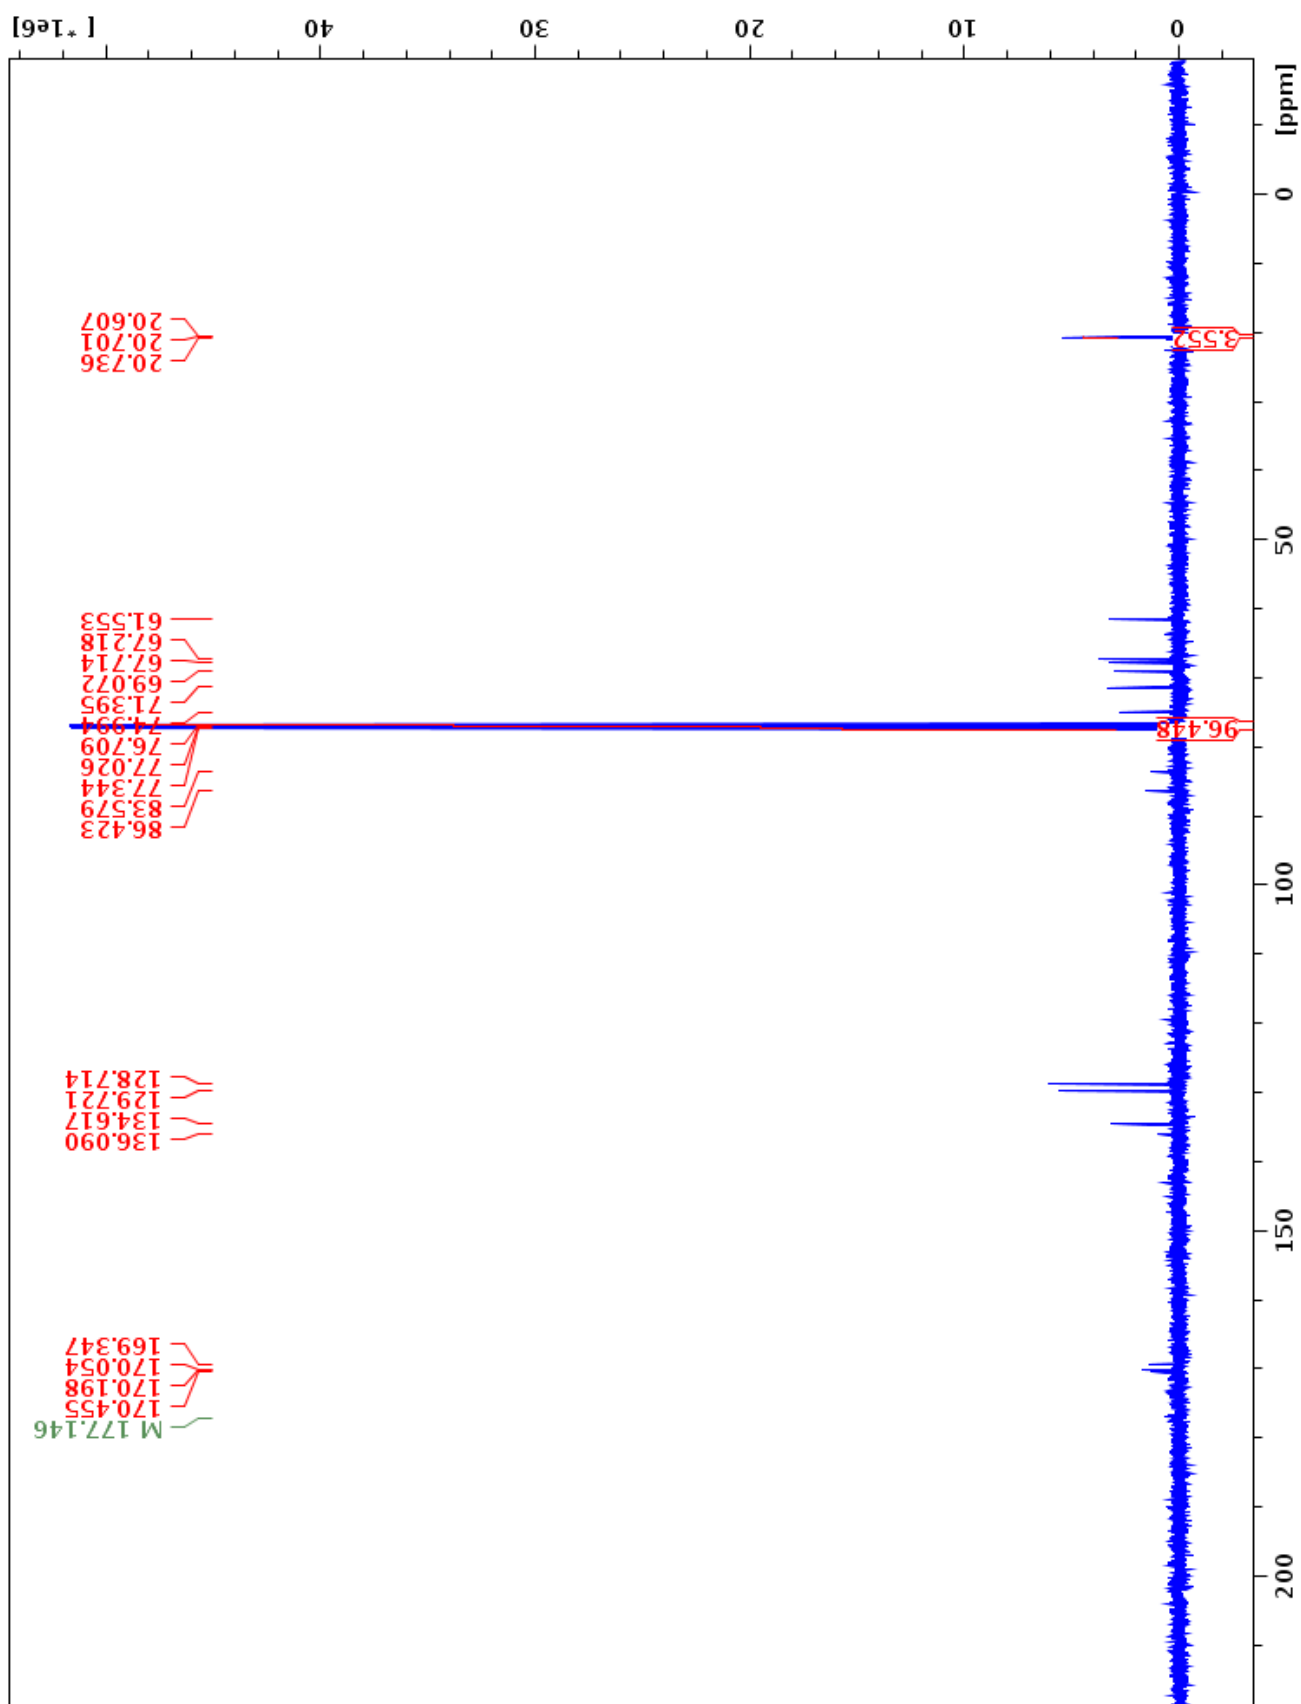



**9b:** 1-naphth-2-yl-3-(2,3,4,6-tetra-*O*-acetyl- $\beta$ -D-galactopyranosyl)-prop-2-yn-1-one

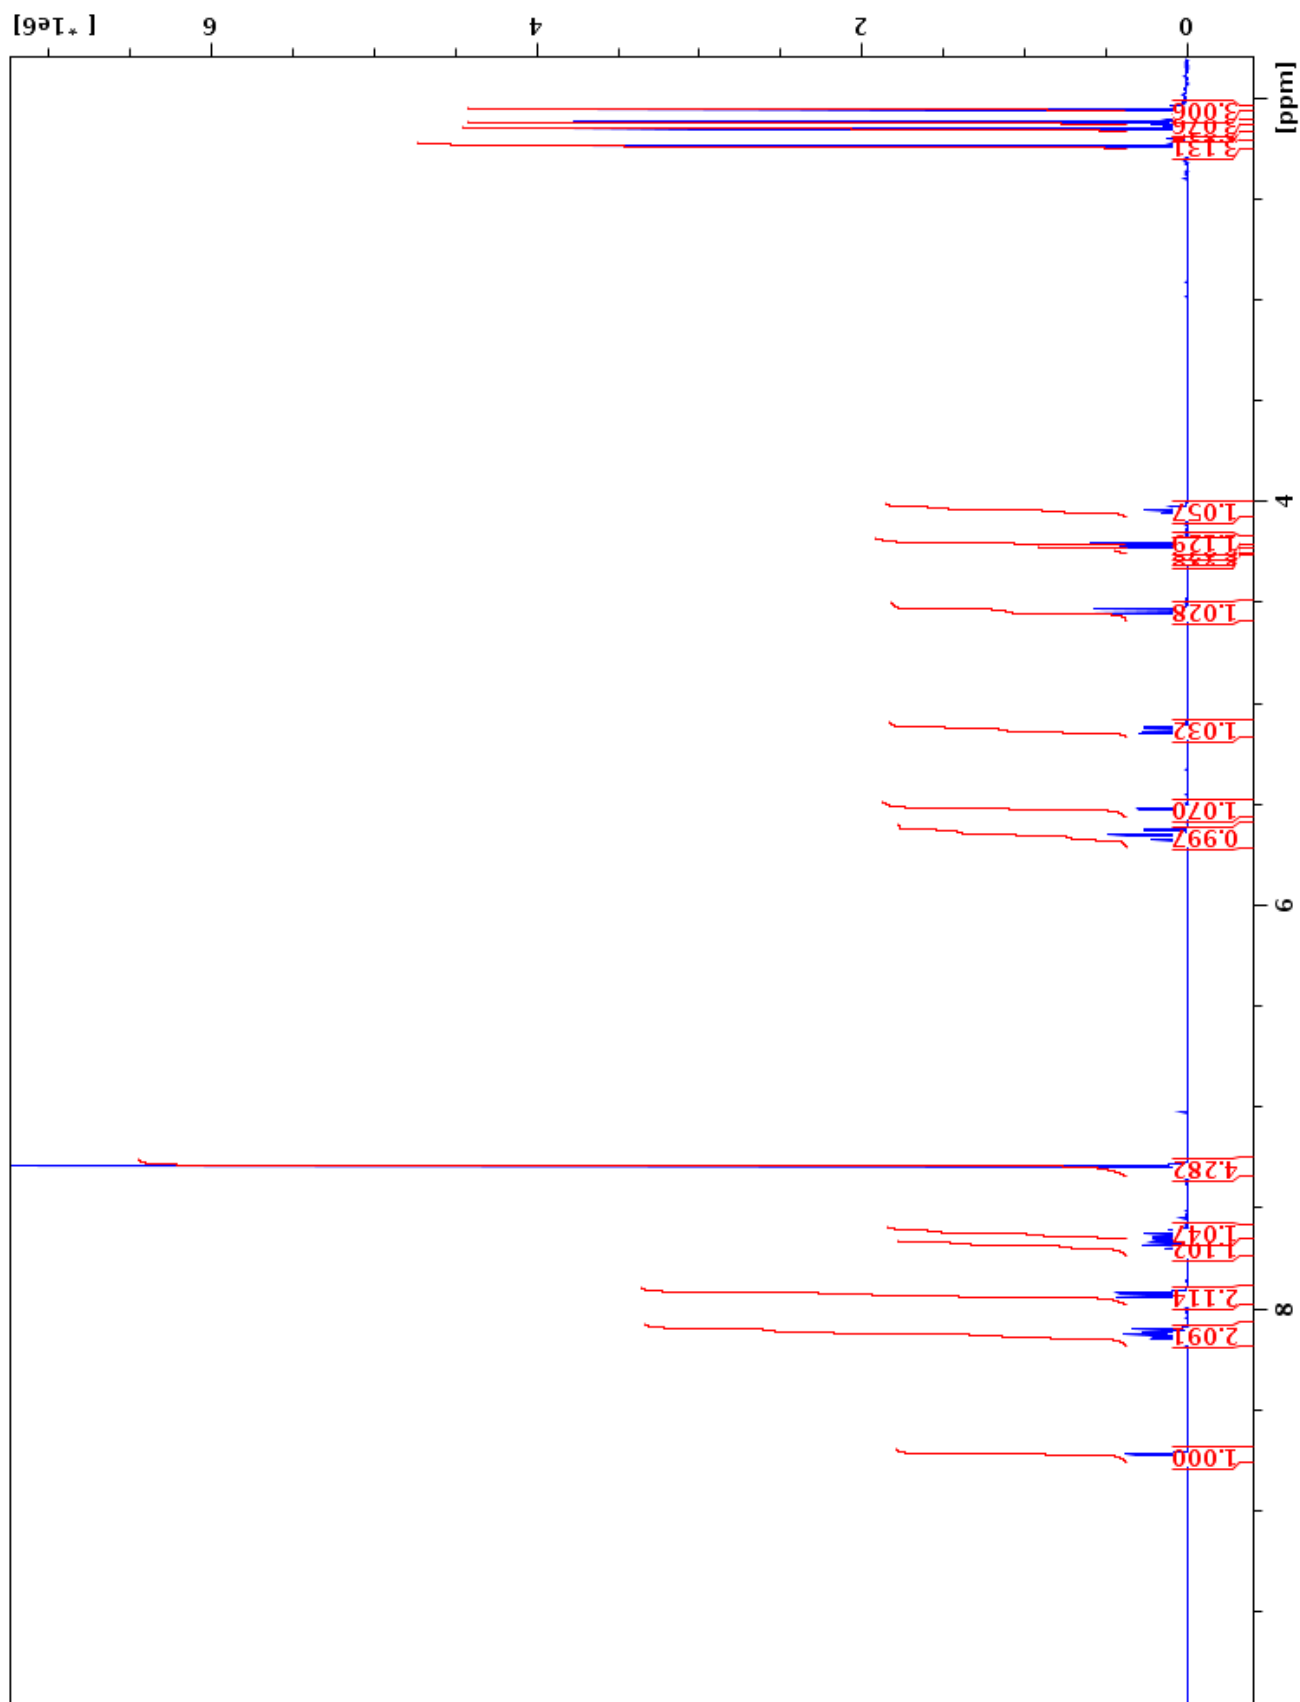

**9b:** 1-naphth-2-yl-3-(2,3,4,6-tetra-*O*-acetyl- $\beta$ -D-galactopyranosyl)-prop-2-yn-1-one

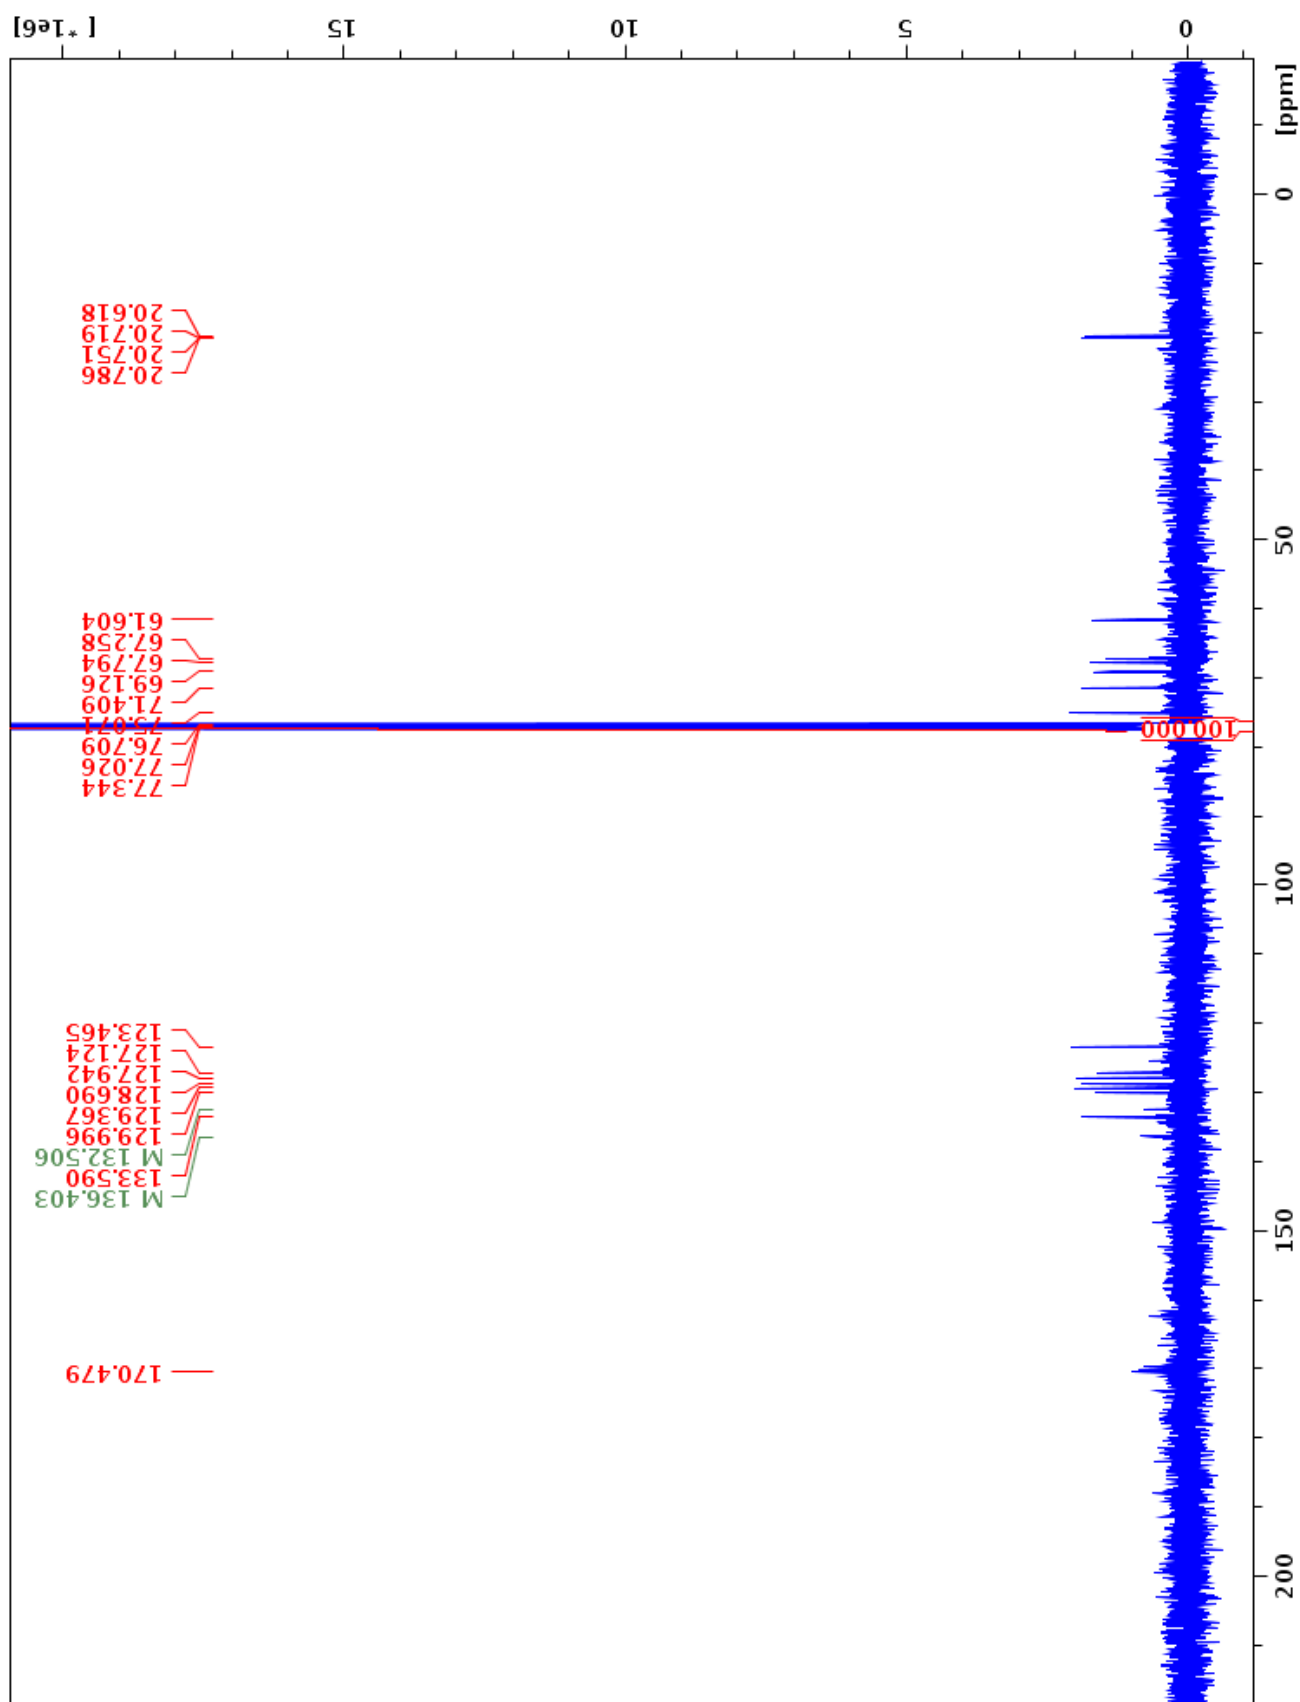

**9c:** 1-naphth-1-yl-3-(2,3,4,6-tetra-*O*-acetyl- $\beta$ -D-galactopyranosyl)-prop-2-yn-1-one

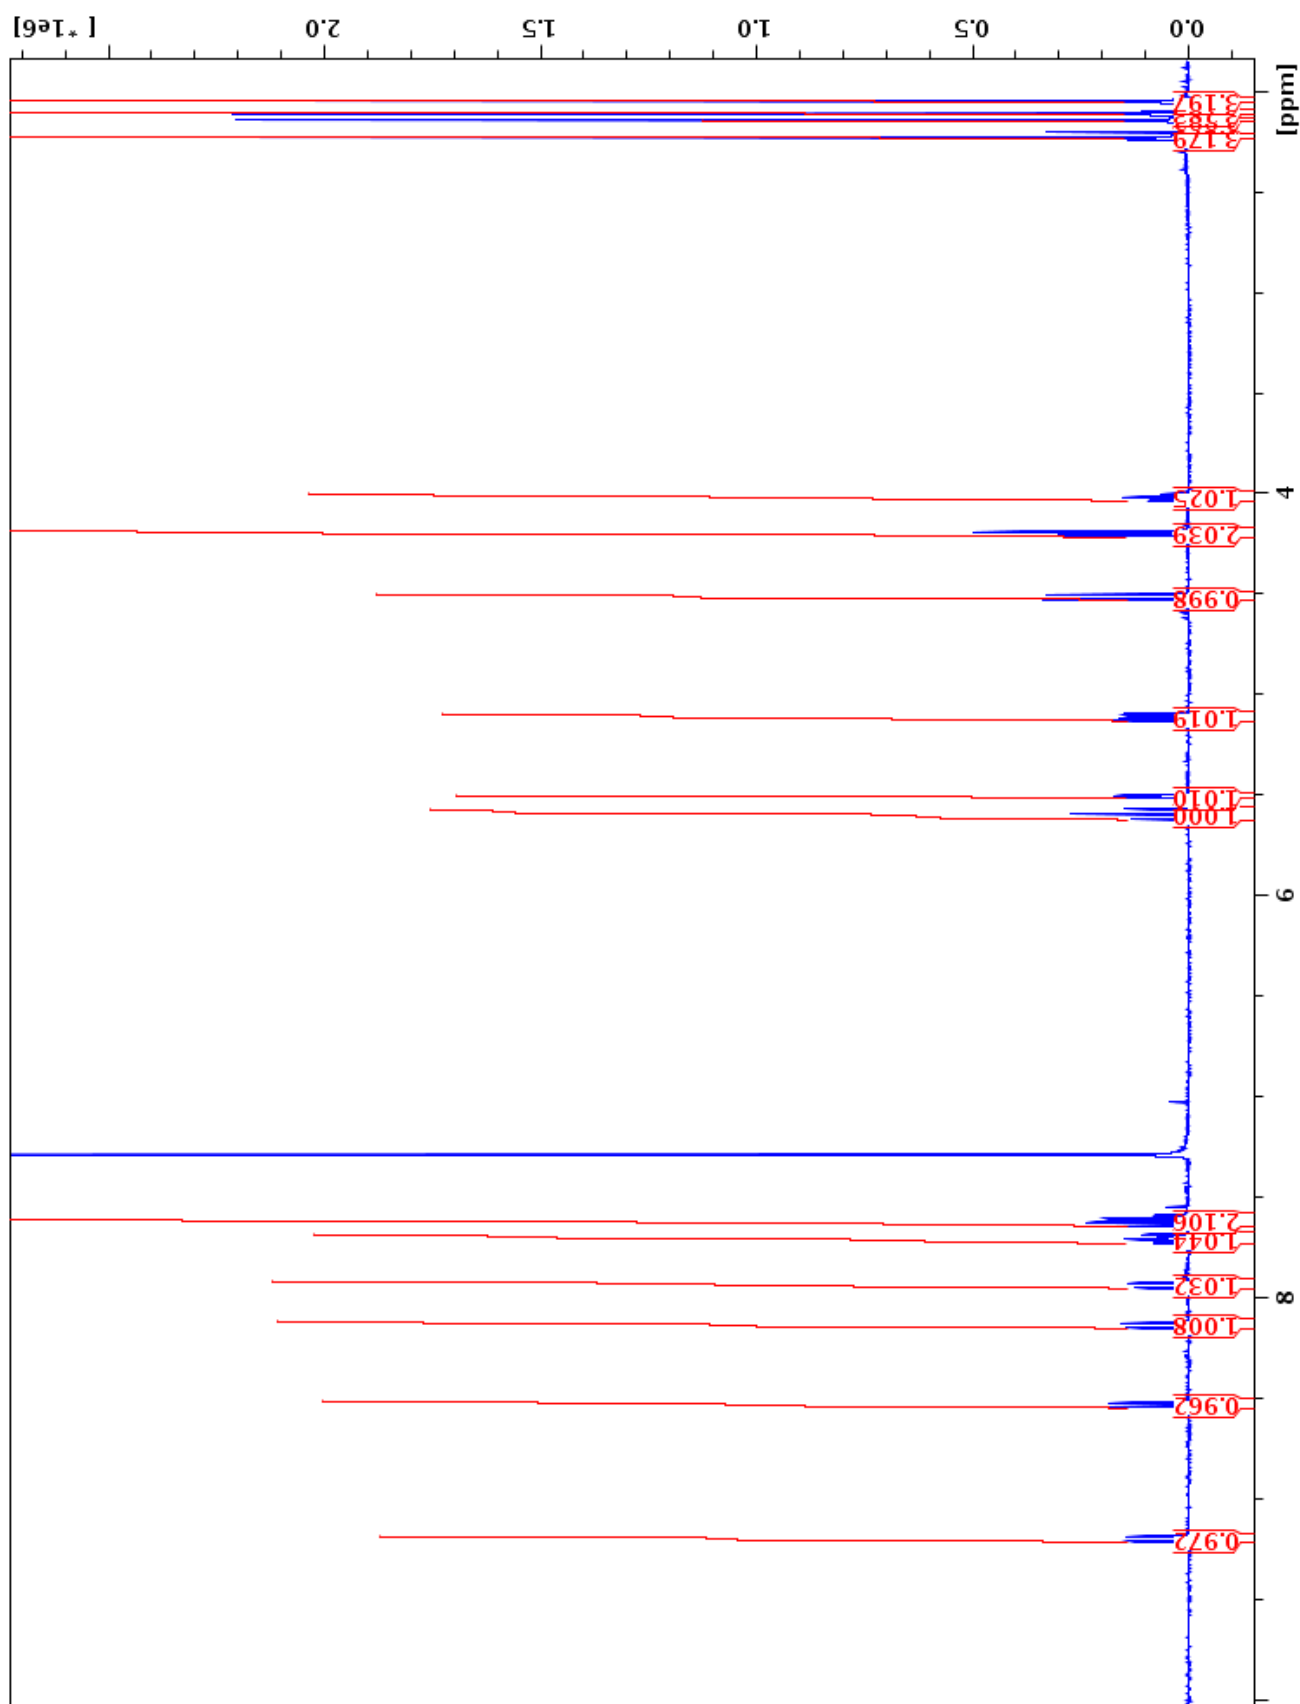

**9c:** 1-naphth-1-yl-3-(2,3,4,6-tetra-*O*-acetyl- $\beta$ -D-galactopyranosyl)-prop-2-yn-1-one

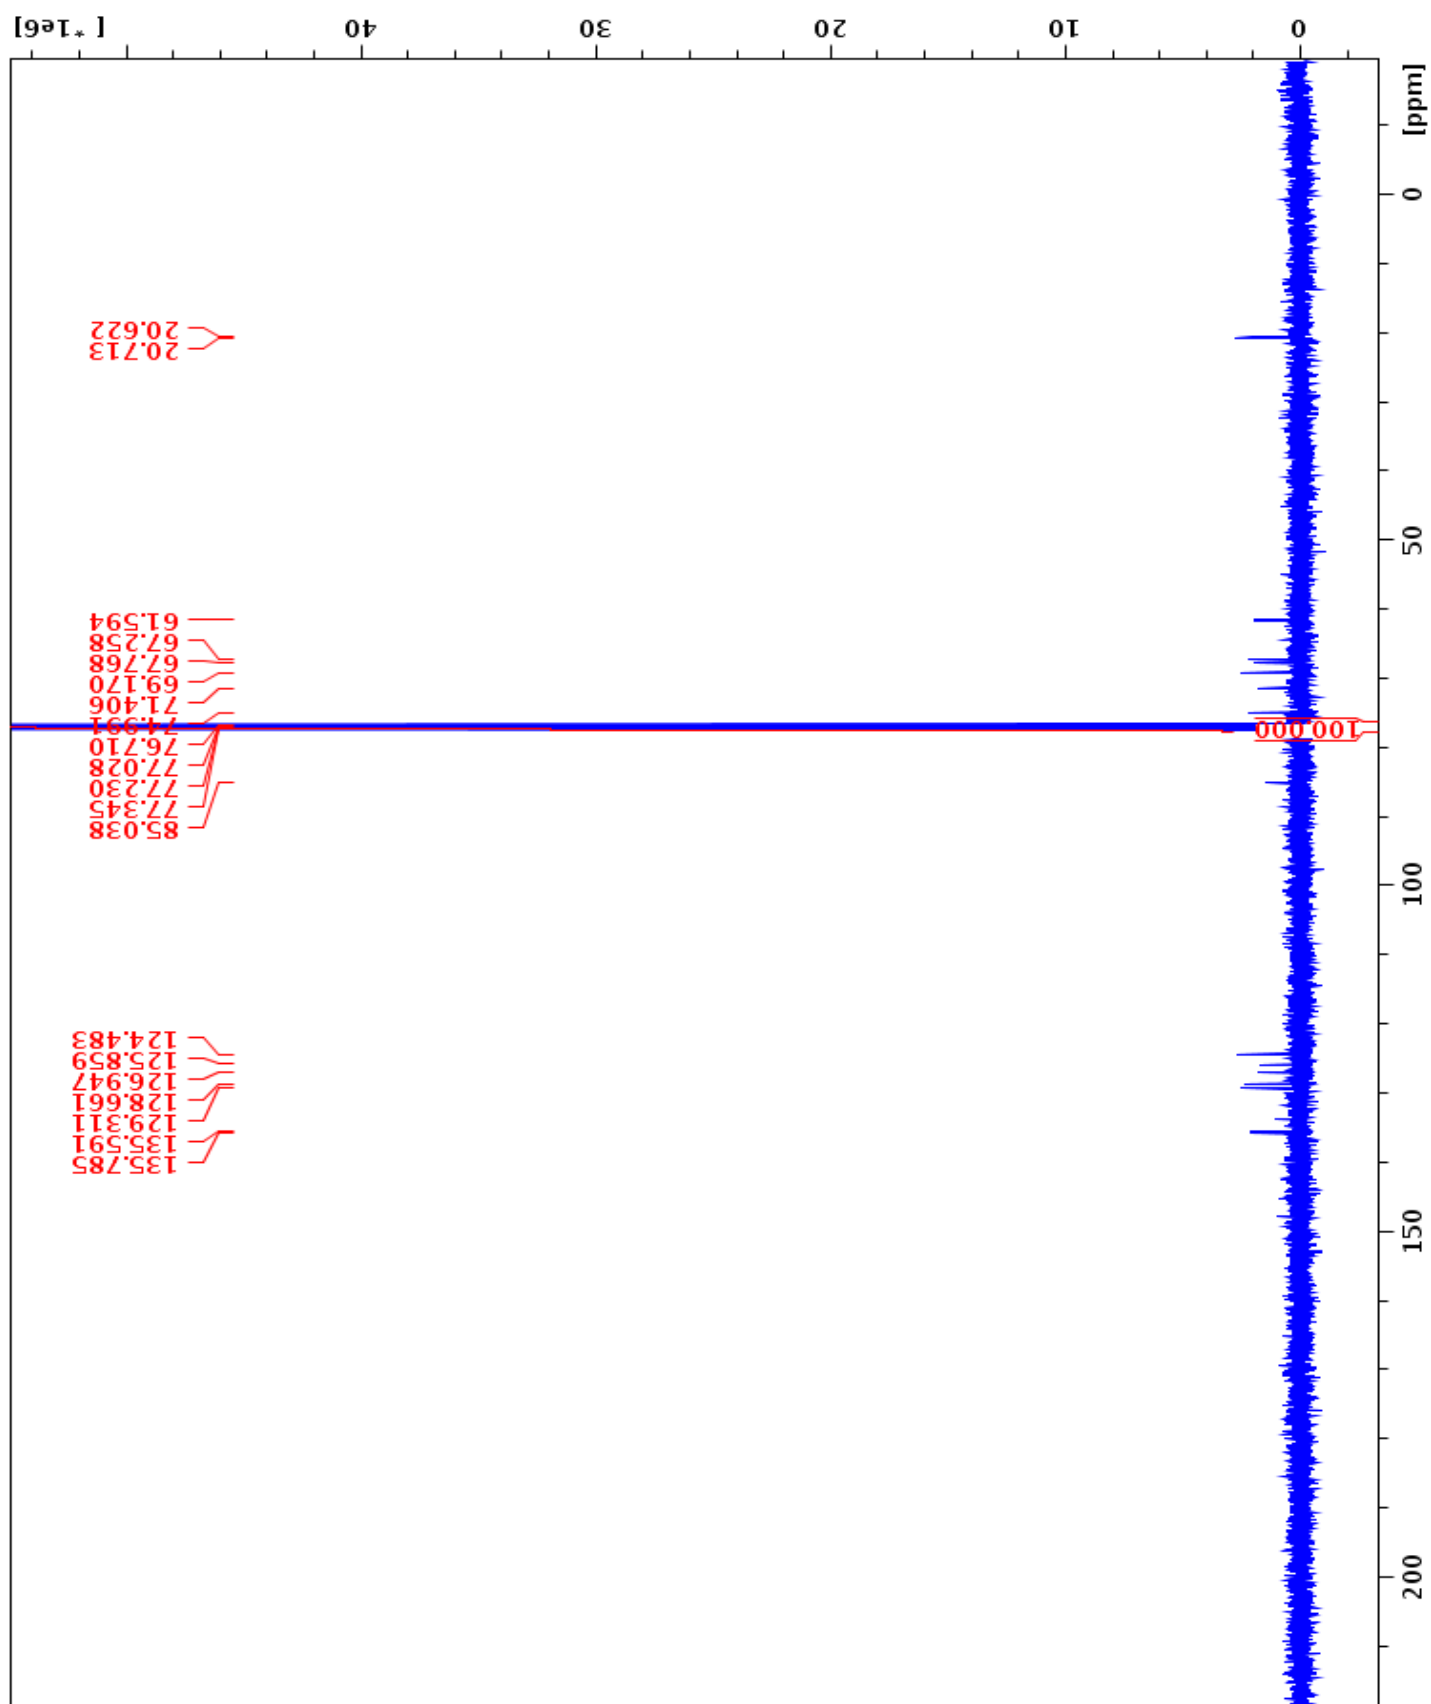

**10a:** 2-phenyl-5-(2,3,4,6-tetra-*O*-acetyl-1-deoxy- $\beta$ -D-galactopyranosyl)oxazole

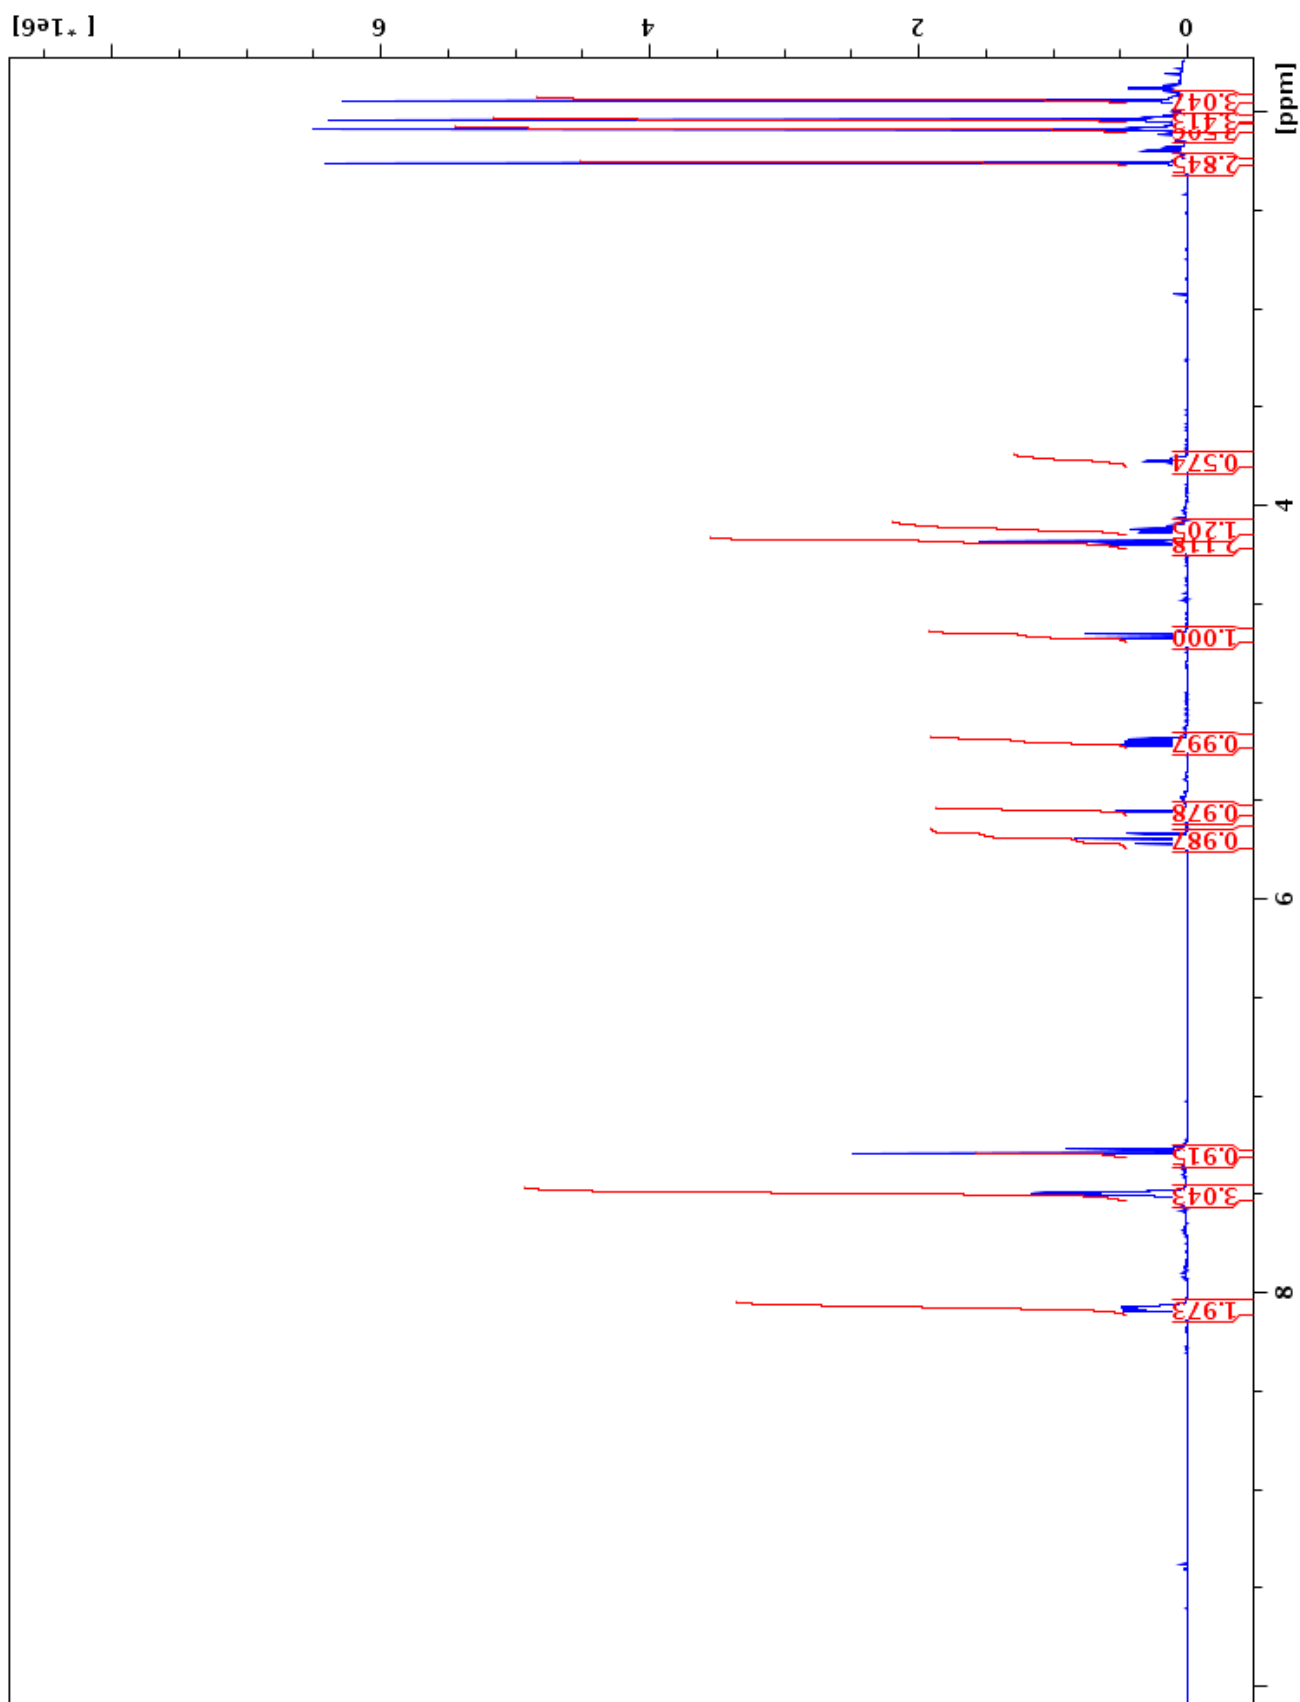

**10a:** 2-phenyl-5-(2,3,4,6-tetra-*O*-acetyl-1-deoxy- $\beta$ -D-galactopyranosyl)oxazole

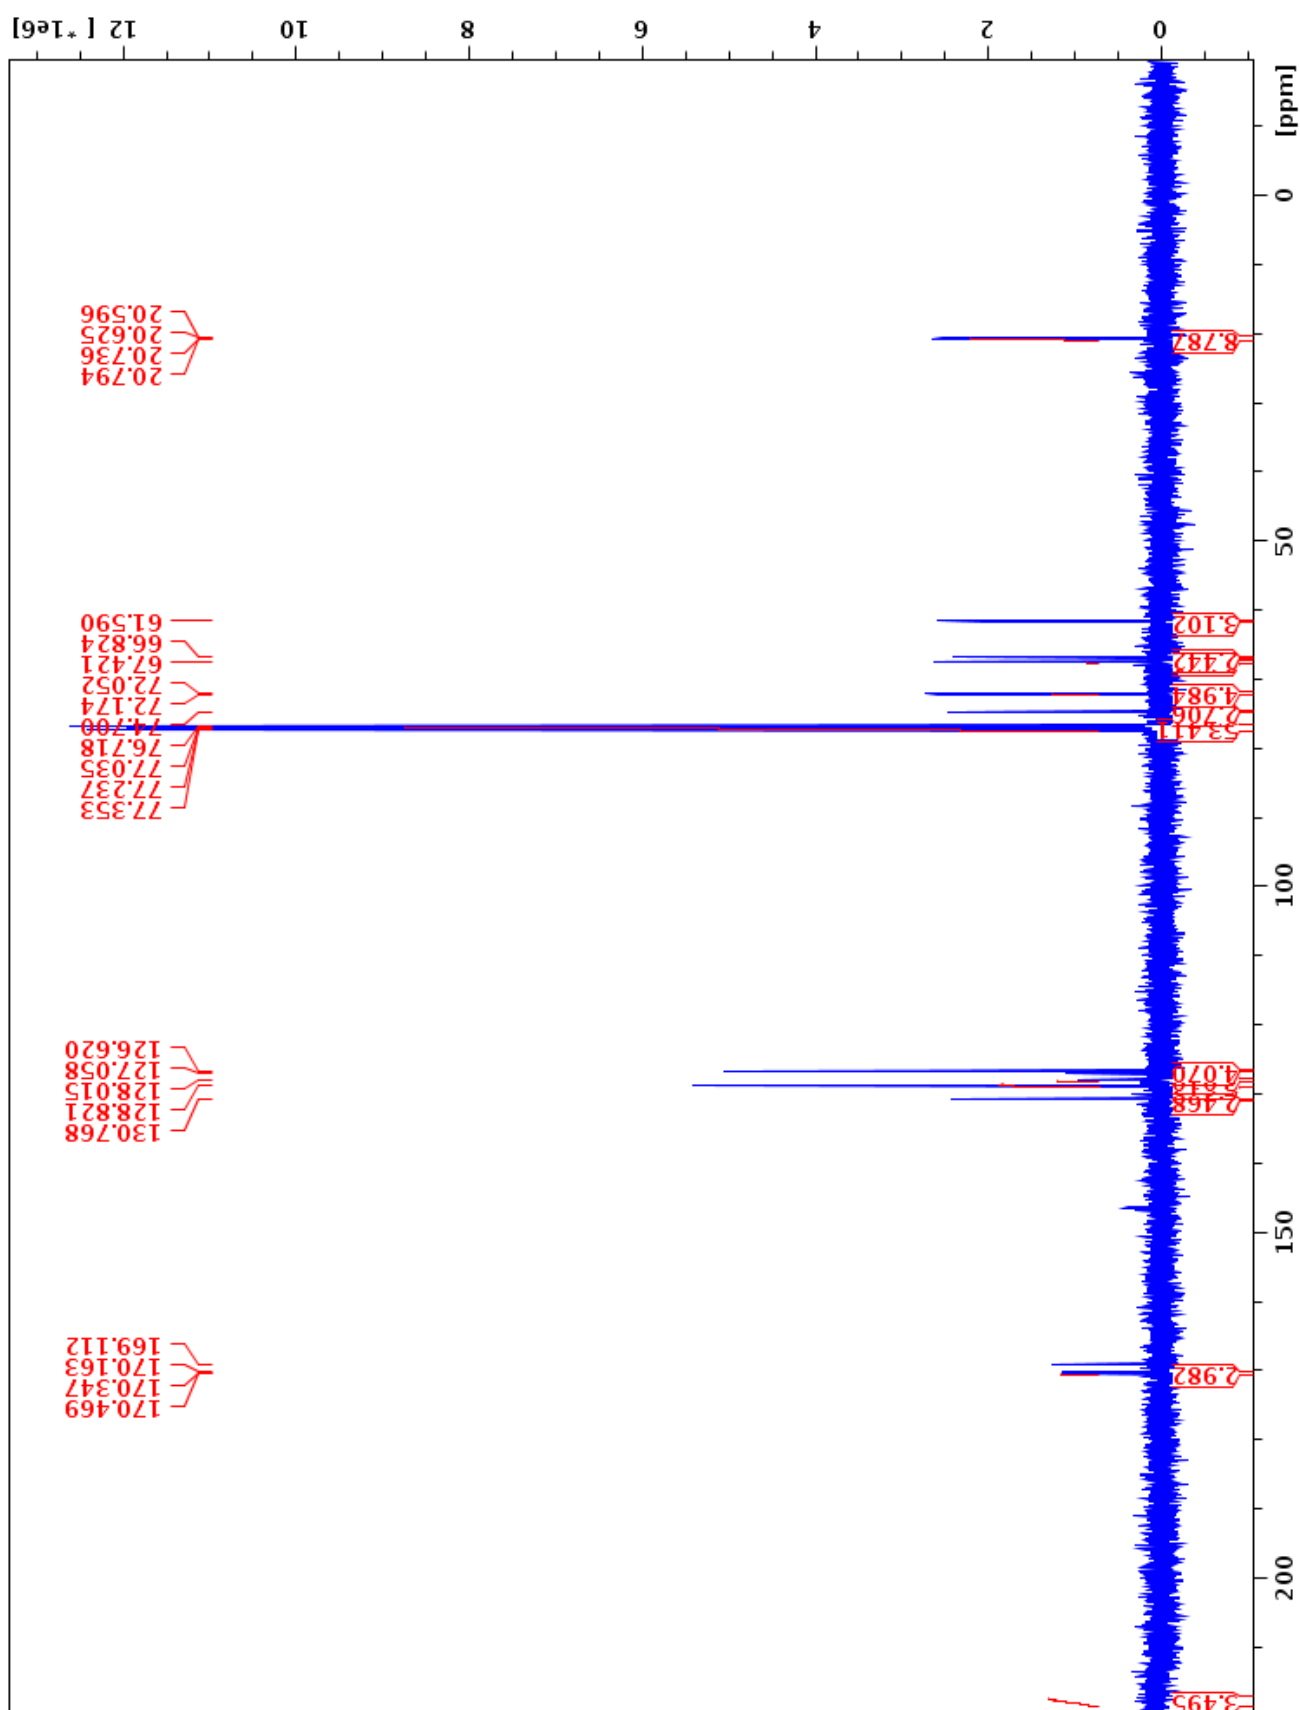

**10b:** 2-naphth-1-yl-5-(2,3,4,6-tetra-*O*-acetyl-1-deoxy- $\beta$ -D-galactopyranosyl)oxazole

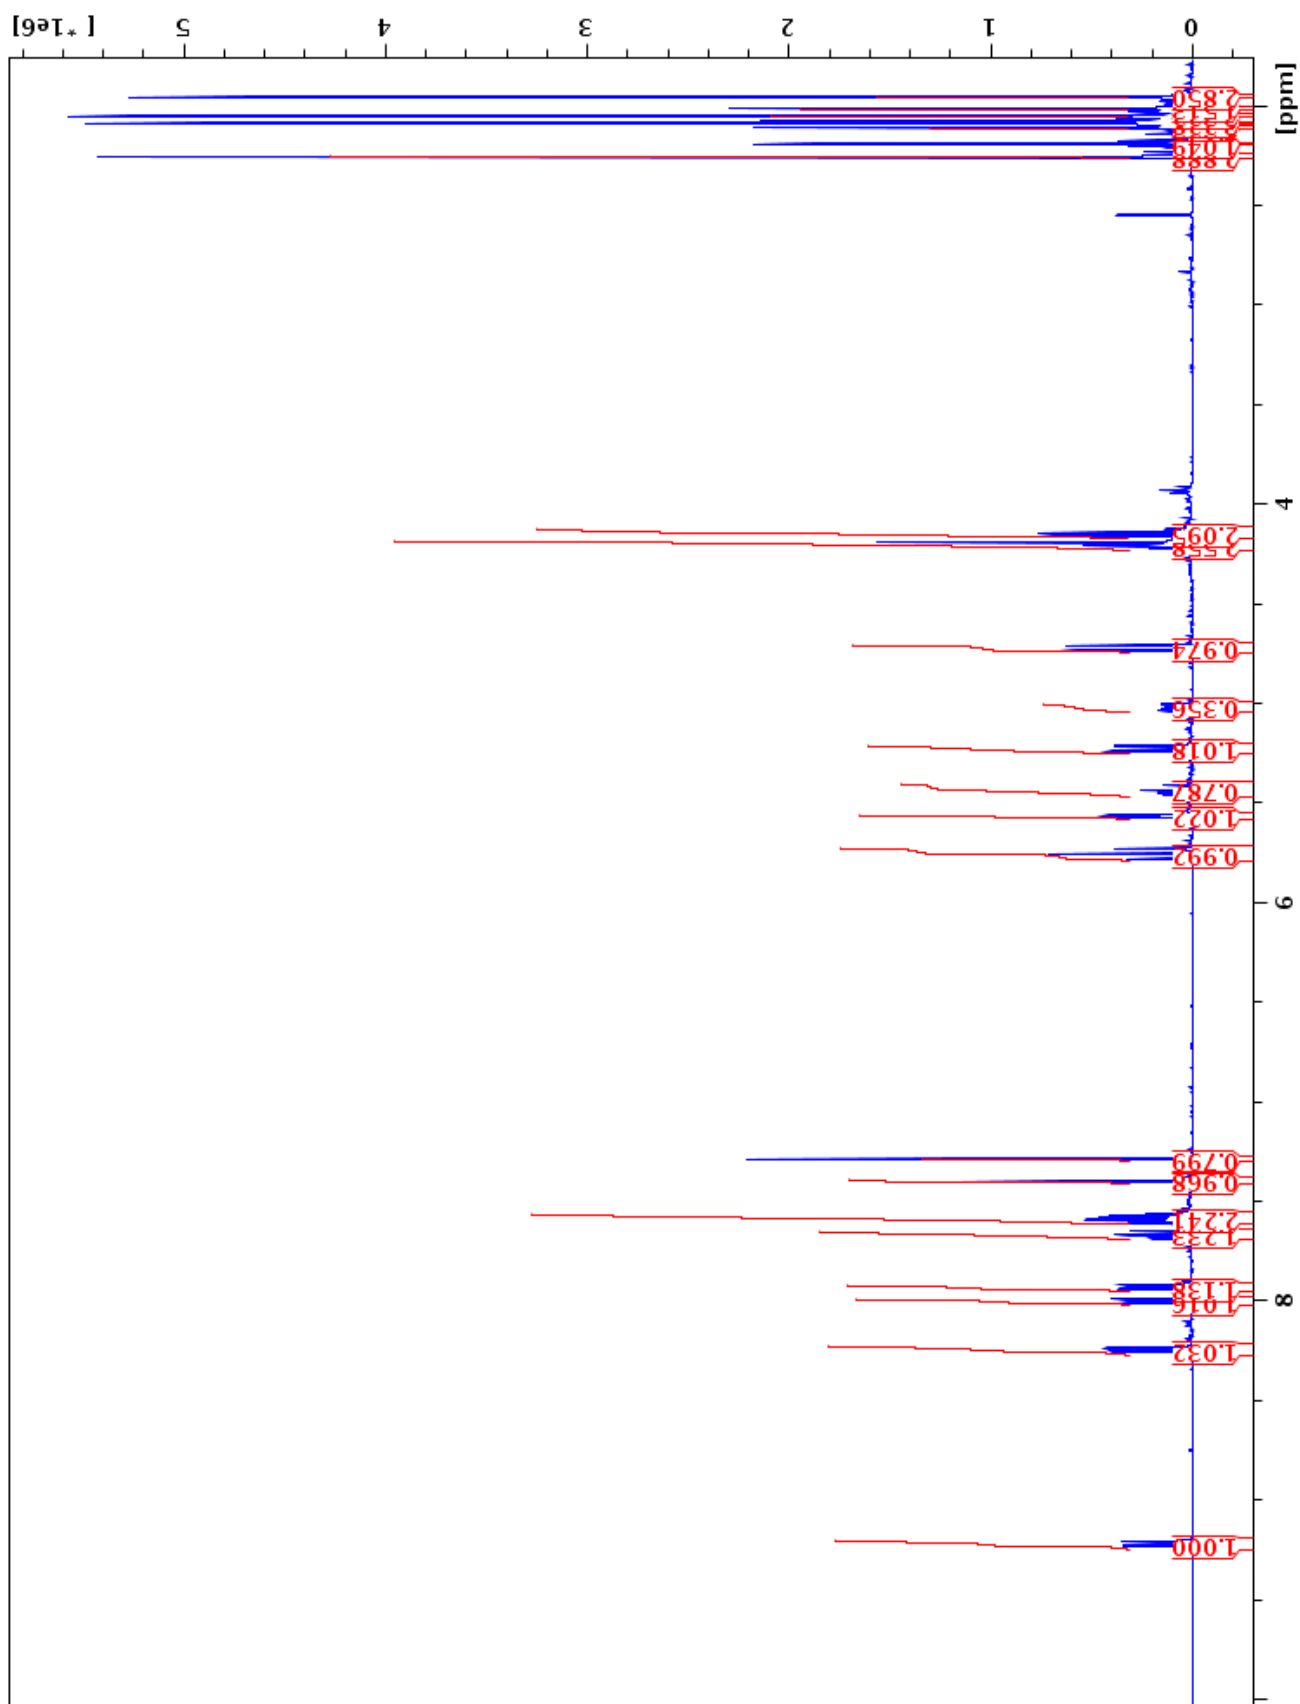

**10b:** 2-naphth-1-yl-5-(2,3,4,6-tetra-*O*-acetyl-1-deoxy- $\beta$ -D-galactopyranosyl)oxazole

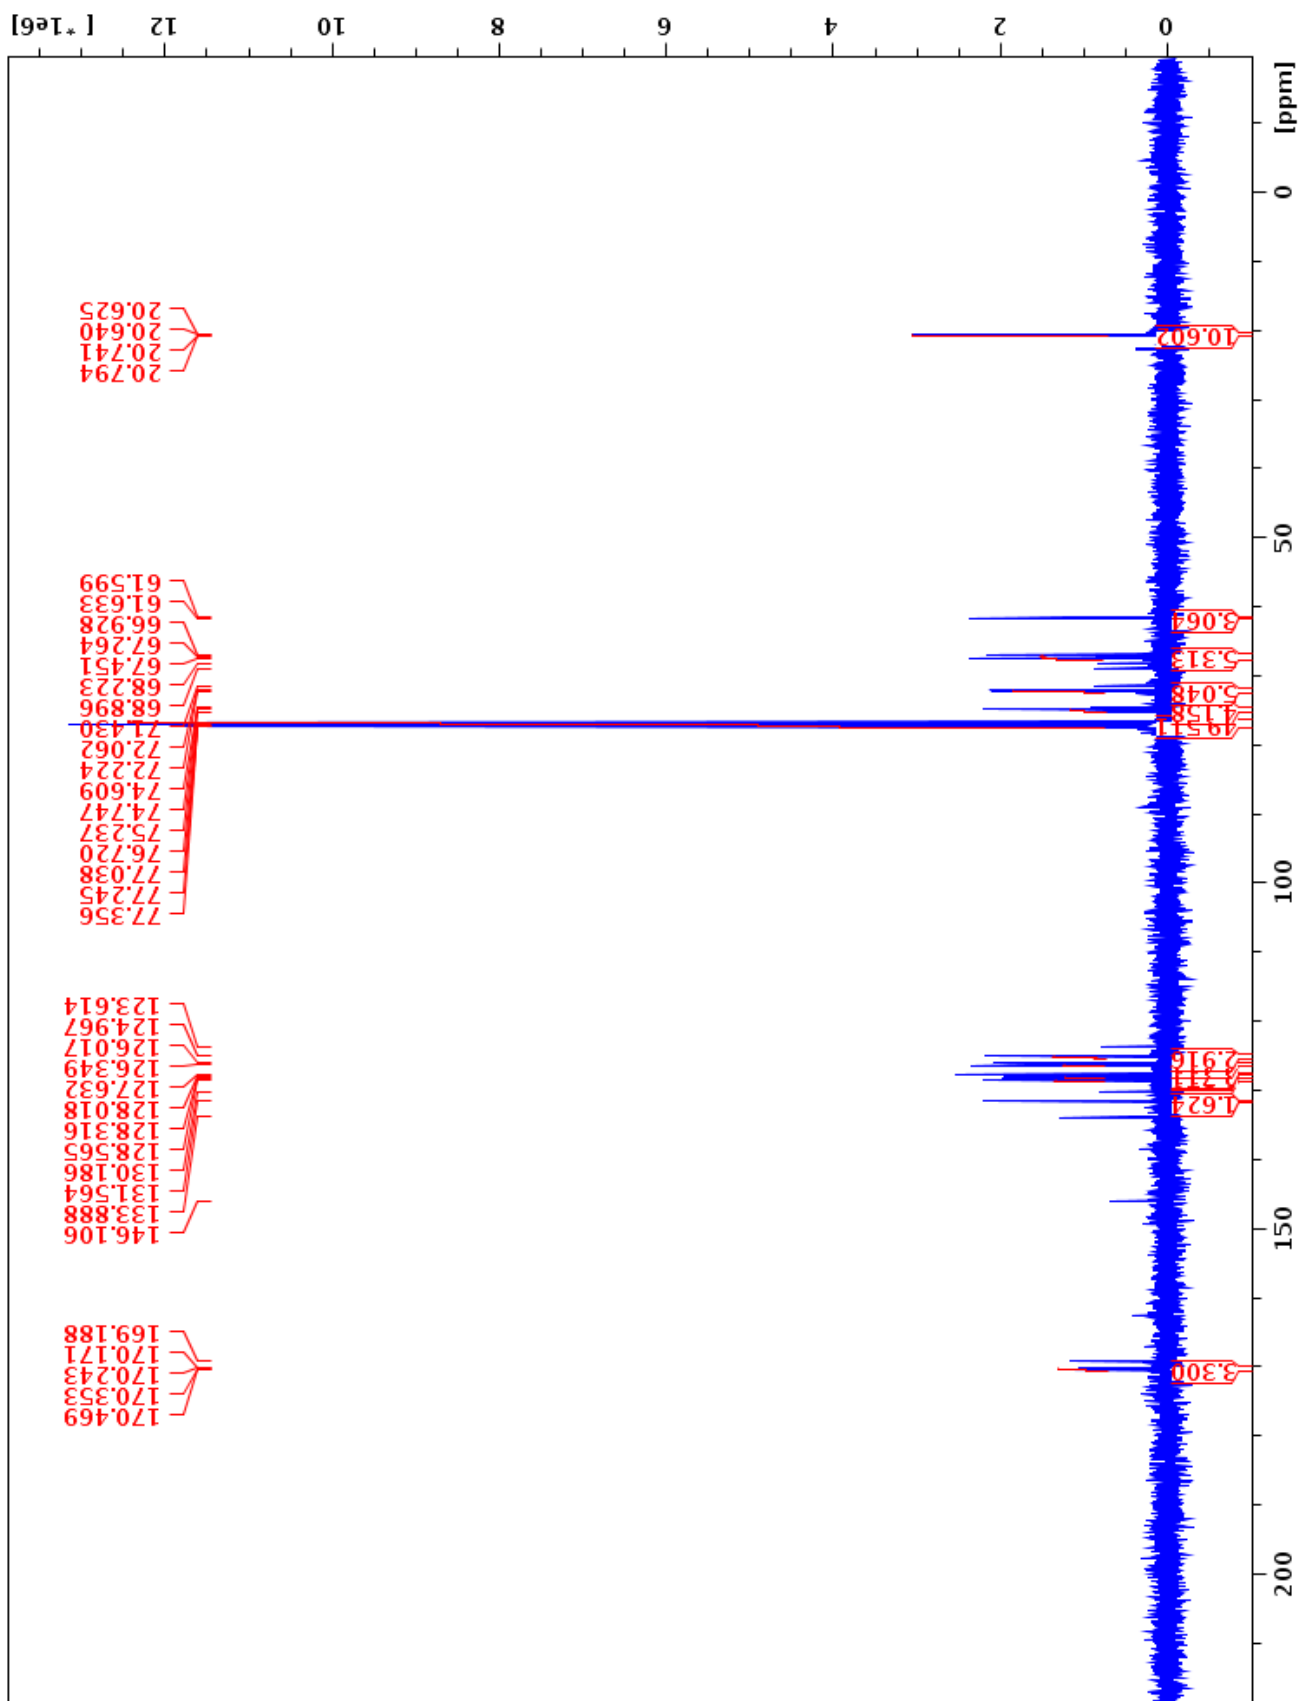



**10c:** 2-naphth-2-yl-5-(2,3,4,6-tetra-*O*-acetyl-1-deoxy- $\beta$ -D-galactopyranosyl)oxazole

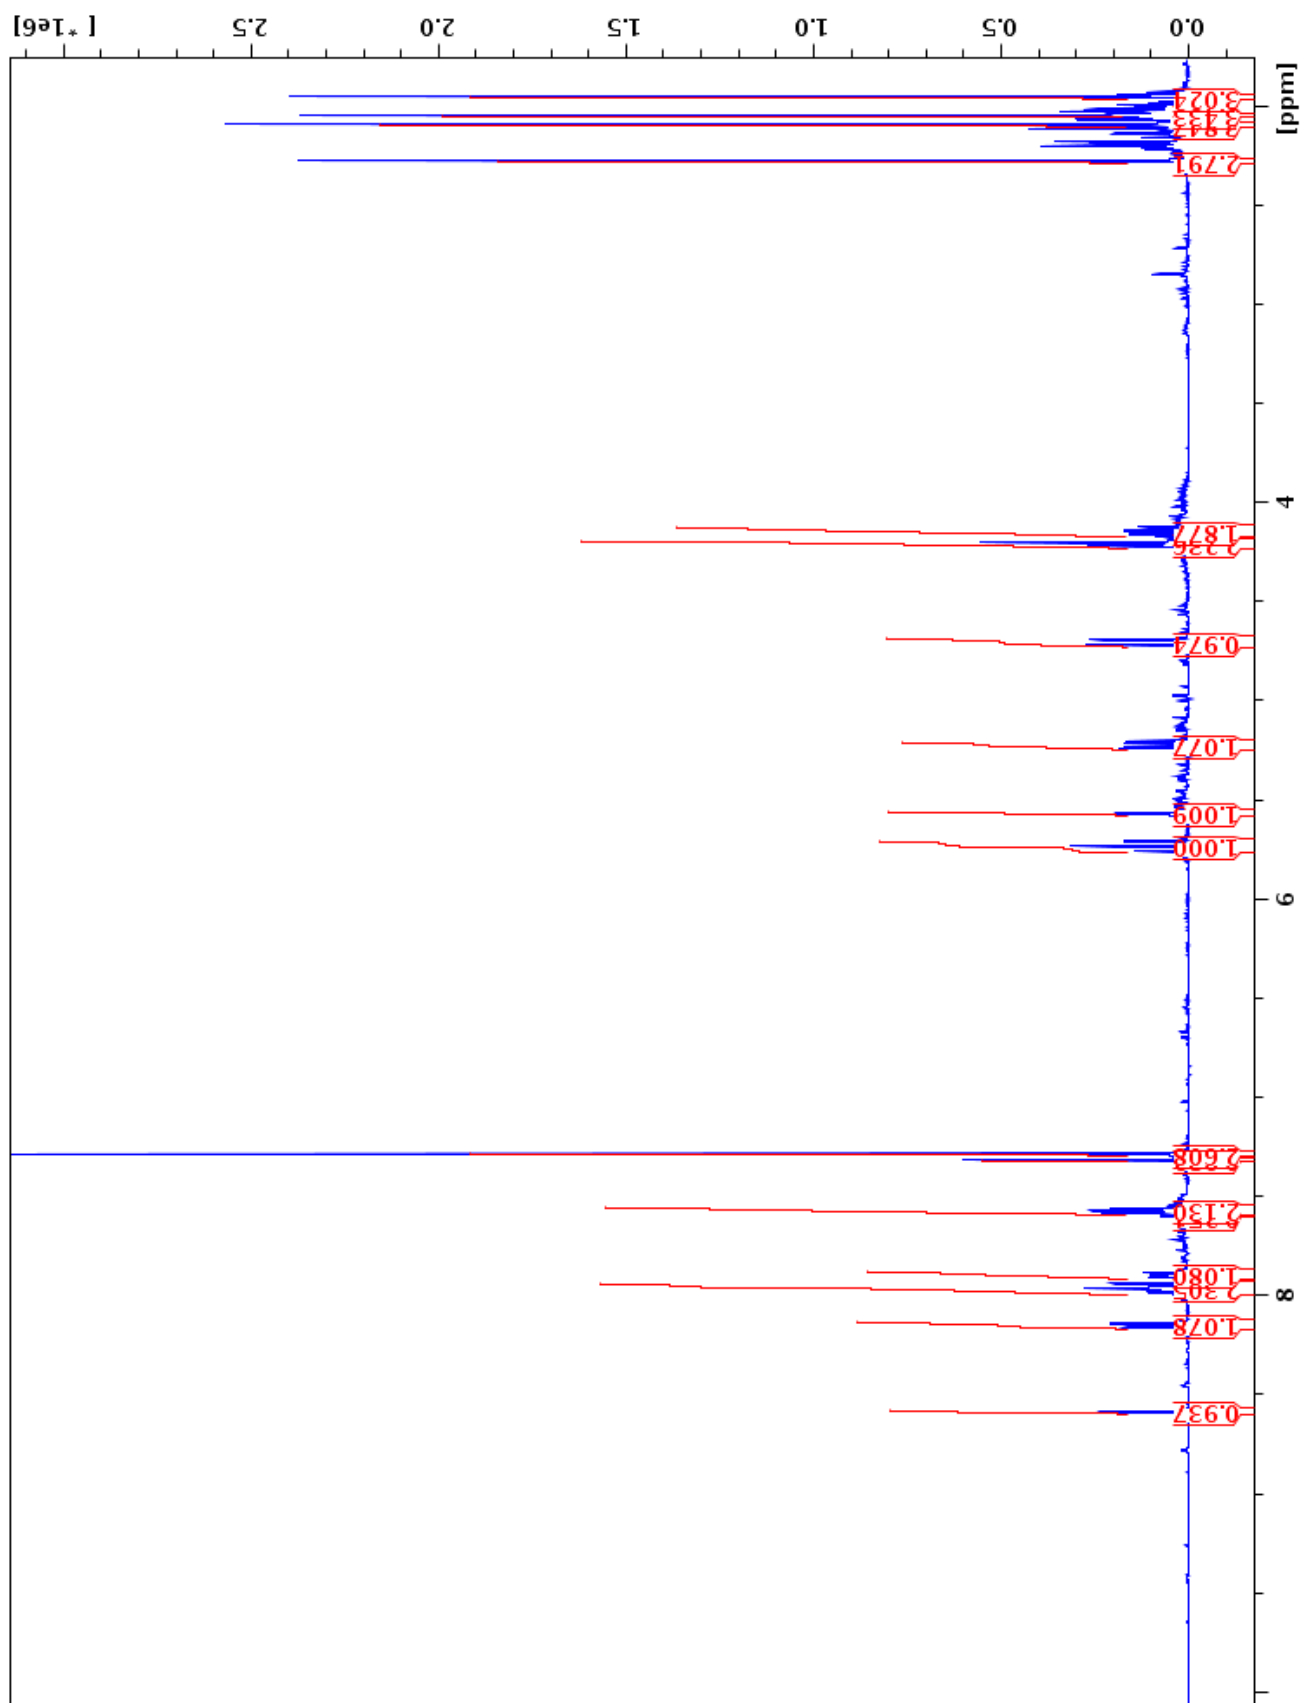

**10c:** 2-naphth-2-yl-5-(2,3,4,6-tetra-*O*-acetyl-1-deoxy- $\beta$ -D-galactopyranosyl)oxazole

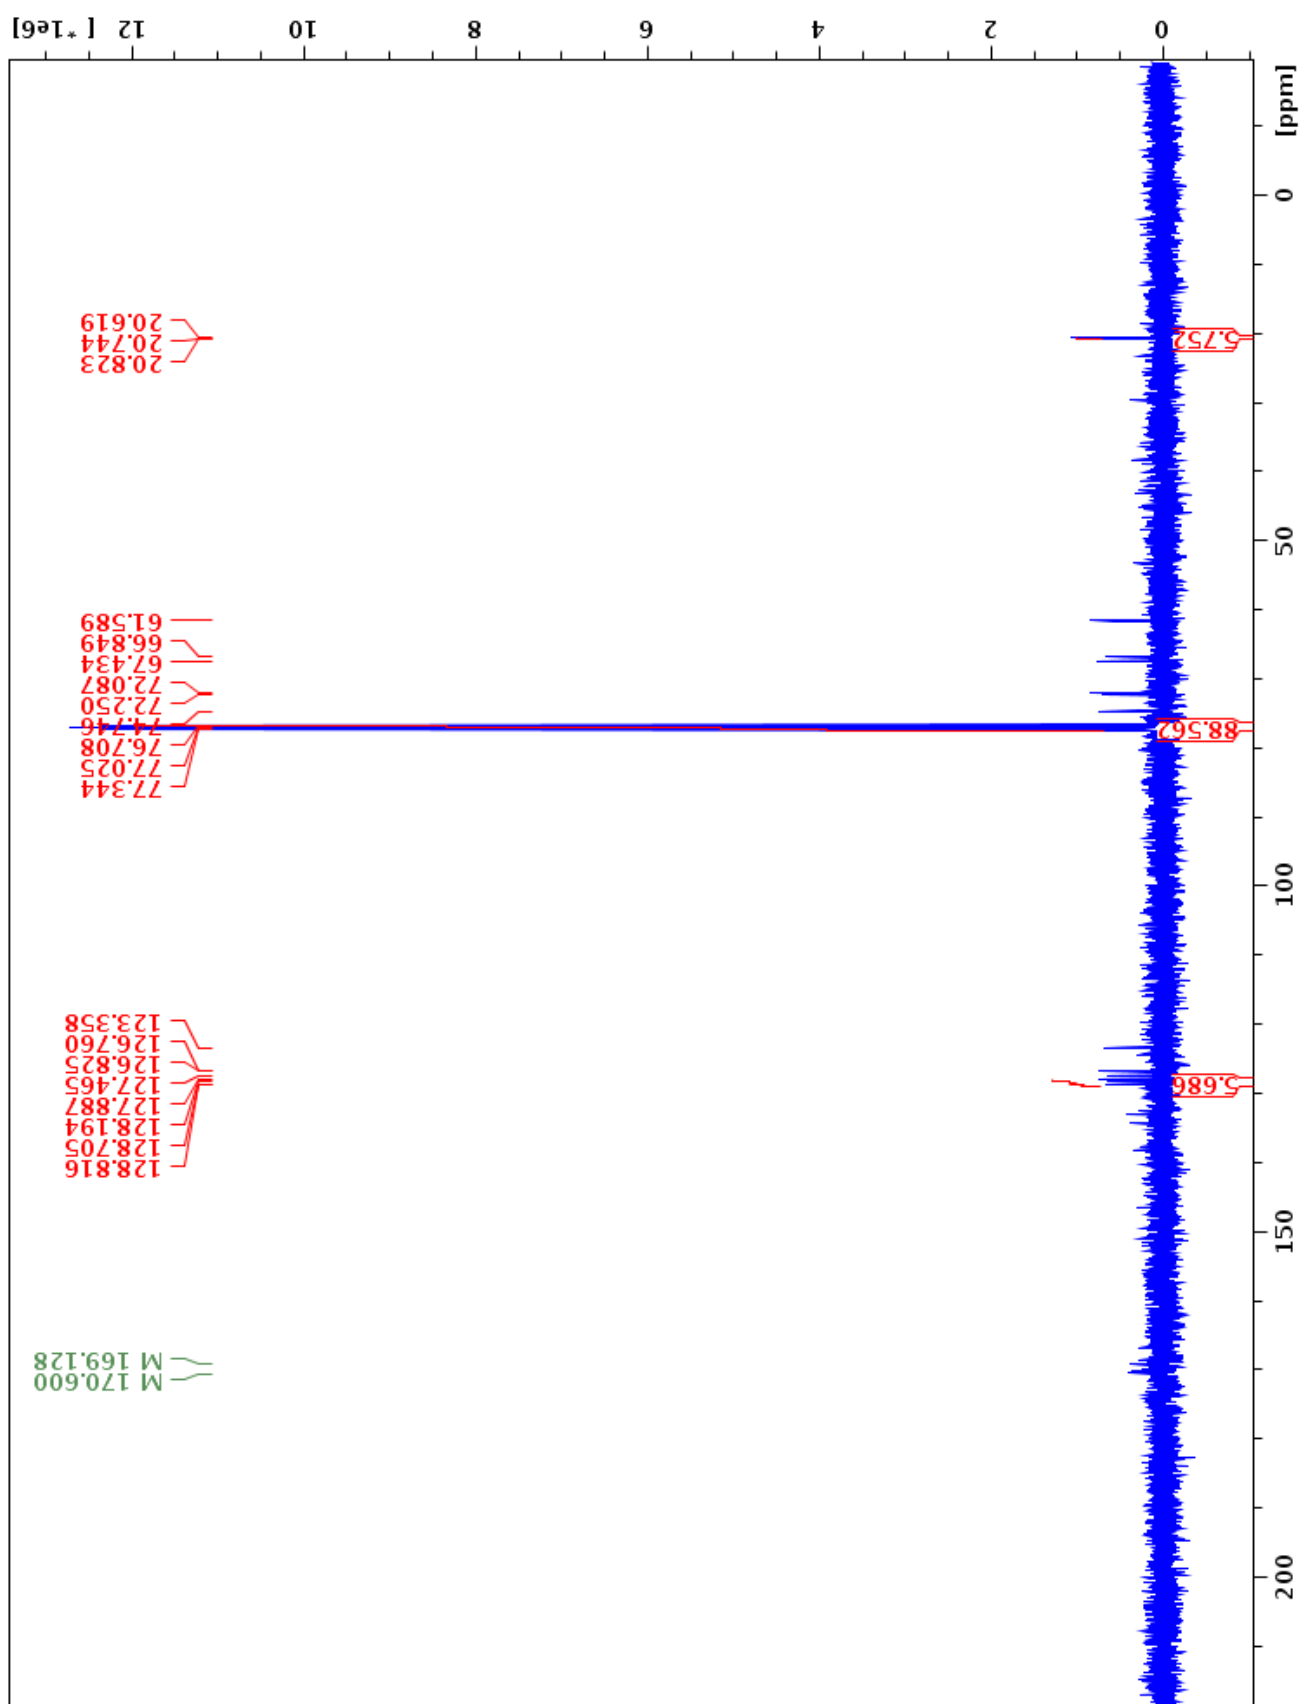

**10d:** 2-(4-chlorophenyl)-5-(2,3,4,6-tetra-*O*-acetyl-1-deoxy- $\beta$ -D-galactopyranosyl)oxazole

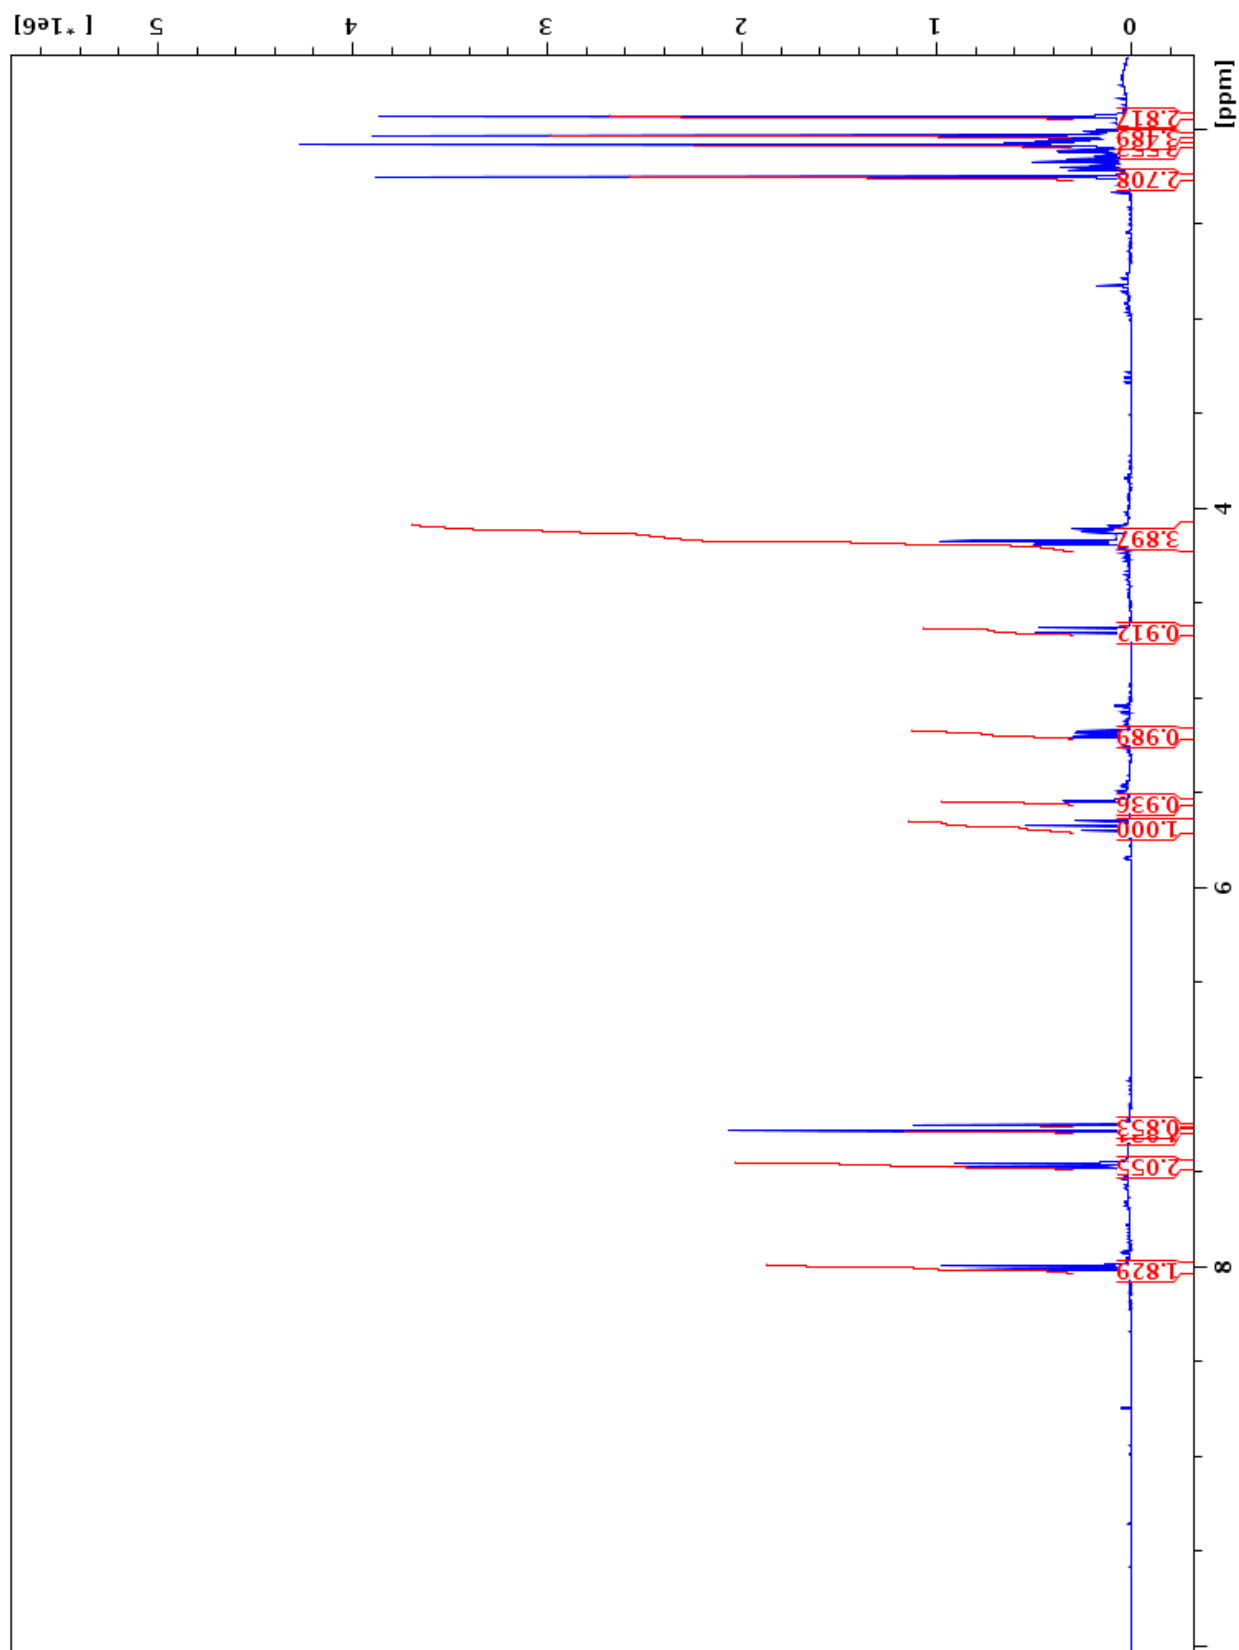

**10d:** 2-(4-chlorophenyl)-5-(2,3,4,6-tetra-*O*-acetyl-1-deoxy- $\beta$ -D-galactopyranosyl)oxazole

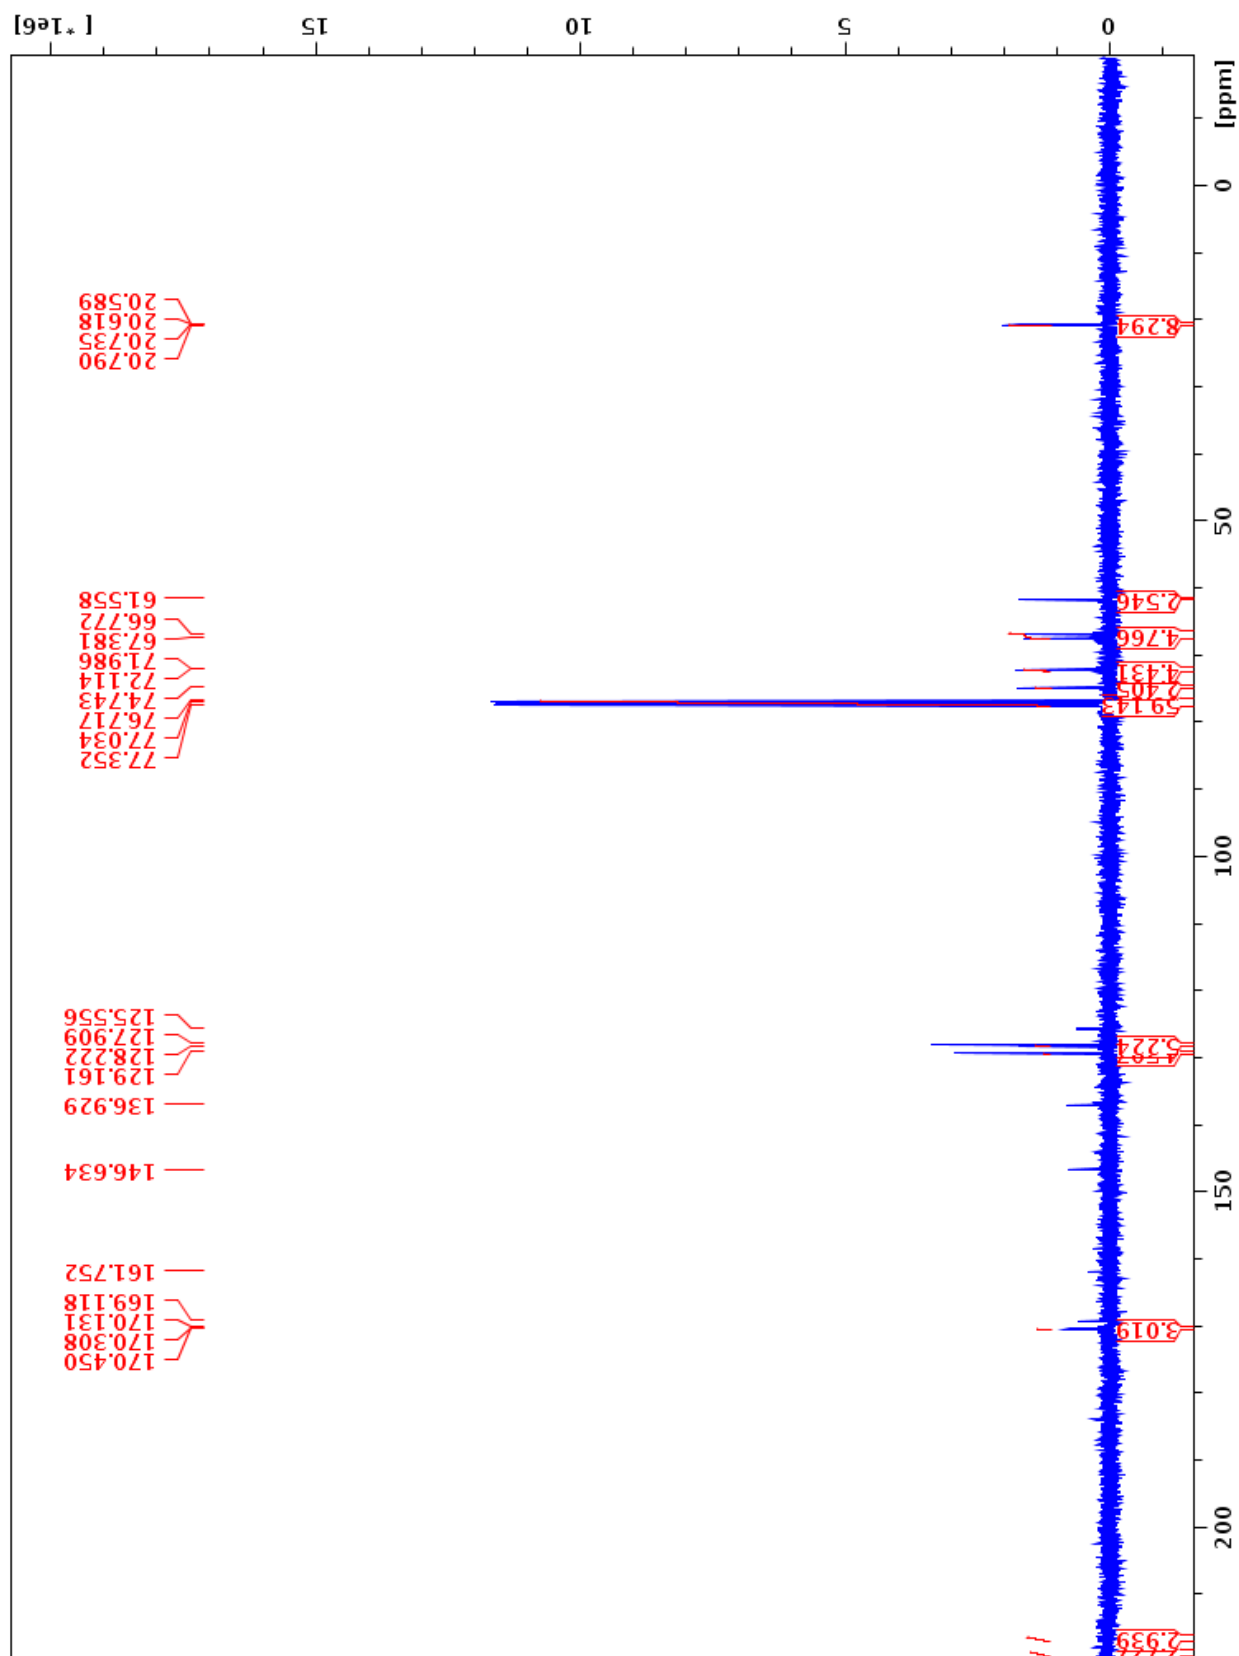

**10e:** 2-(3-chlorophenyl)-5-(2,3,4,6-tetra-*O*-acetyl-1-deoxy- $\beta$ -D-galactopyranosyl)oxazole

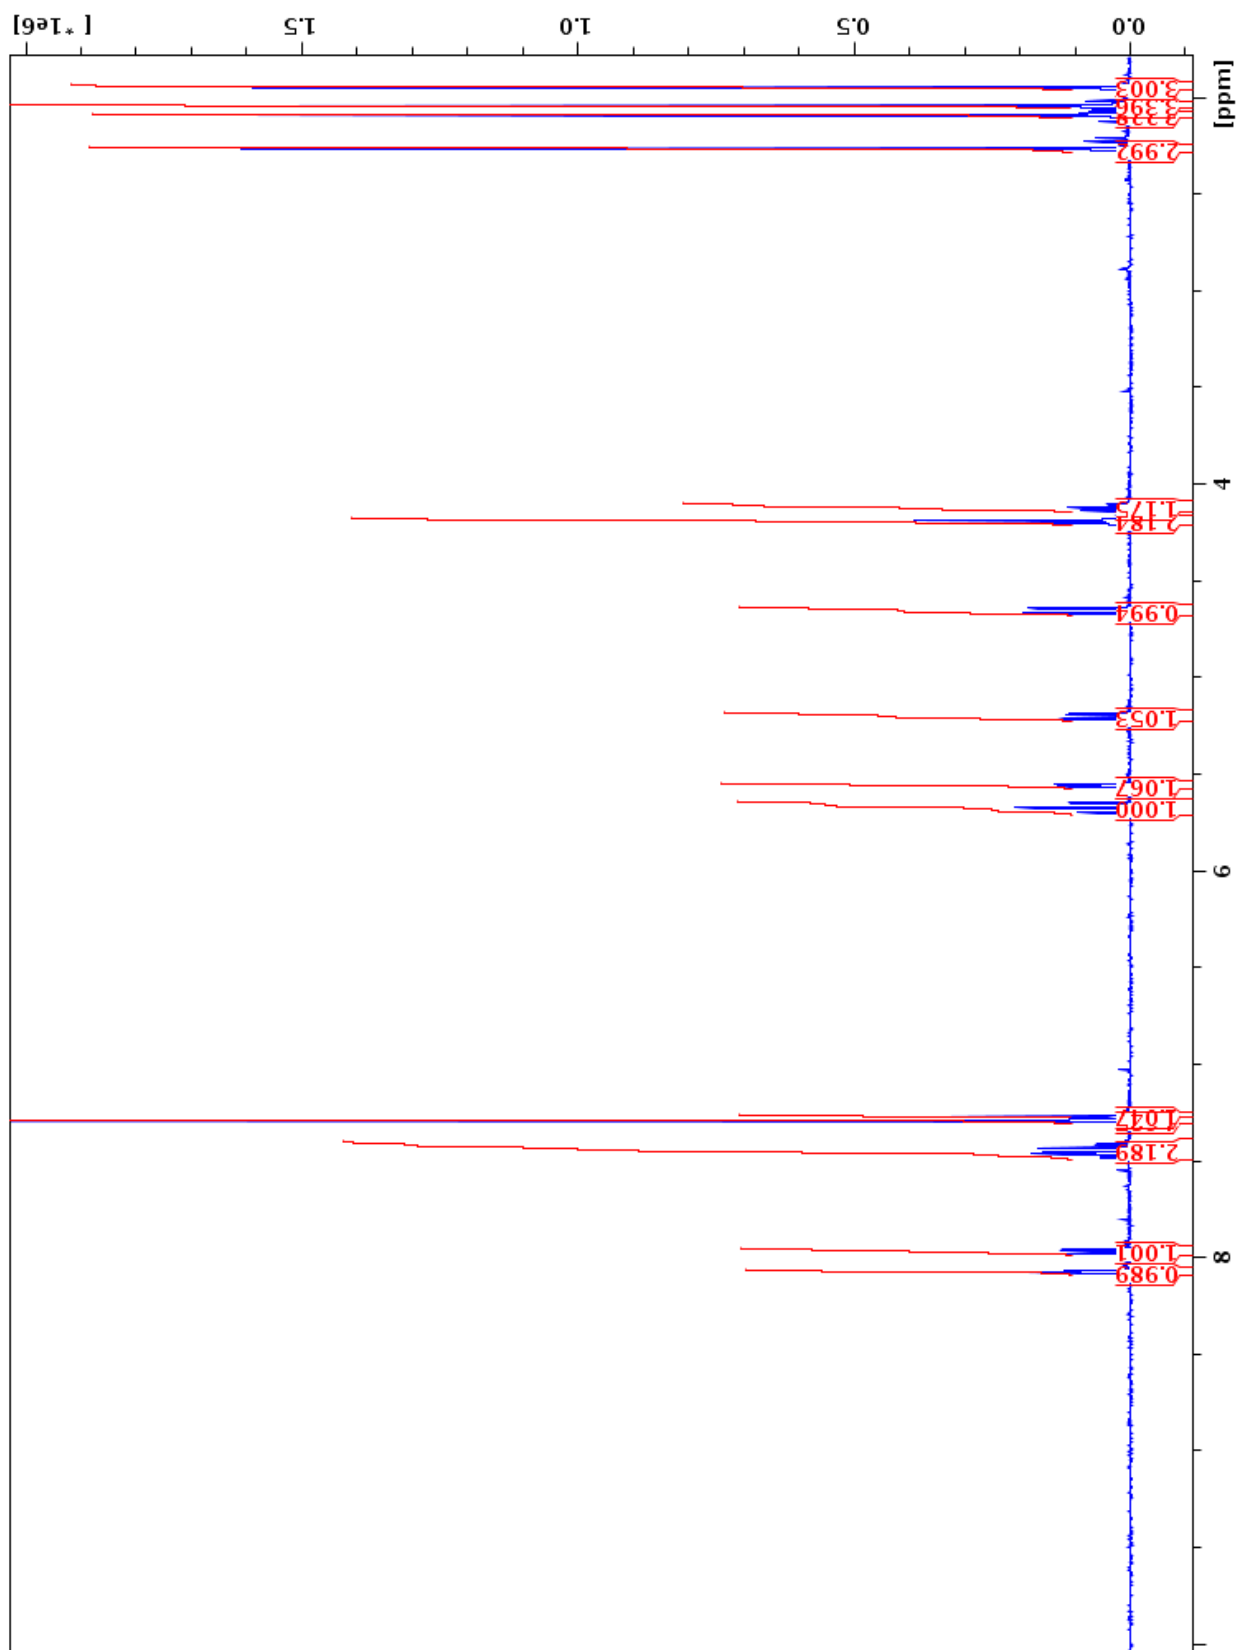

**10e:** 2-(3-chlorophenyl)-5-(2,3,4,6-tetra-*O*-acetyl-1-deoxy- $\beta$ -D-galactopyranosyl)oxazole

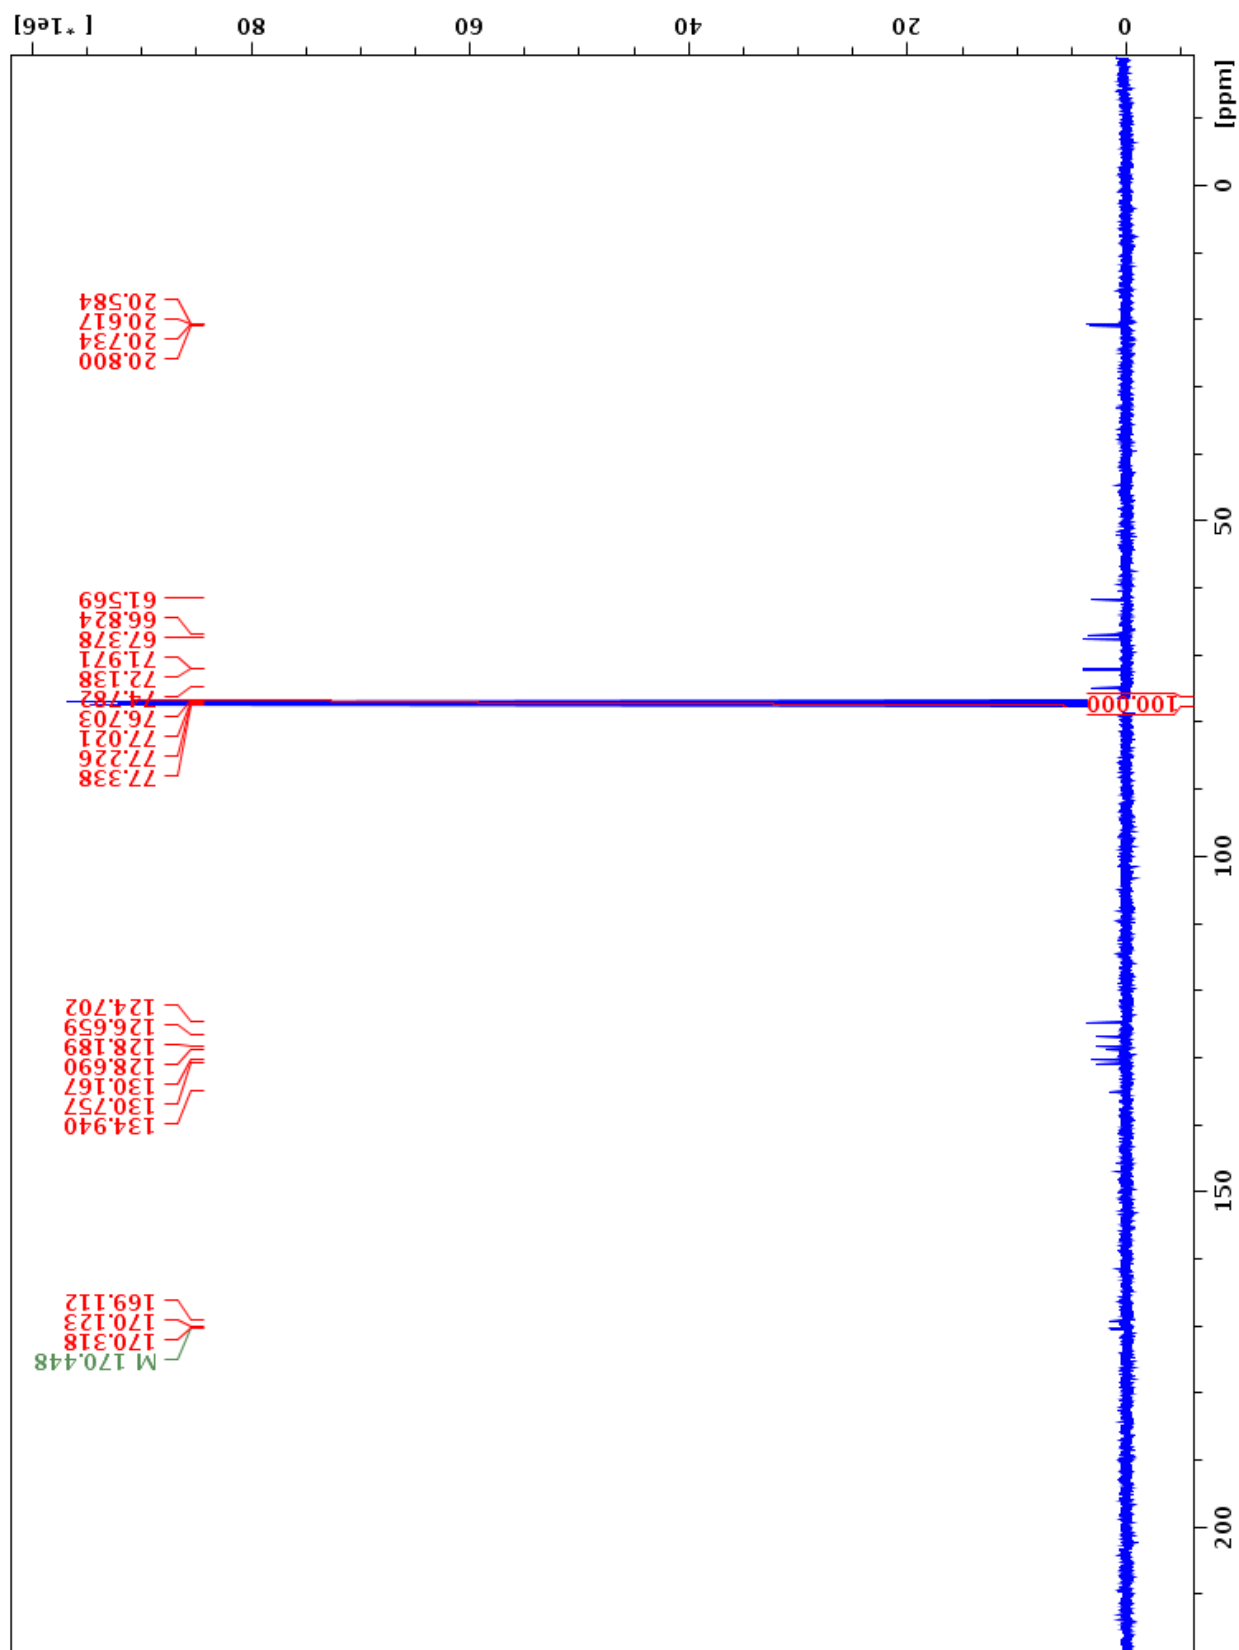

**10f:** 2-(4-methylphenyl)-5-(2,3,4,6-tetra-*O*-acetyl-1-deoxy- $\beta$ -D-galactopyranosyl)oxazole

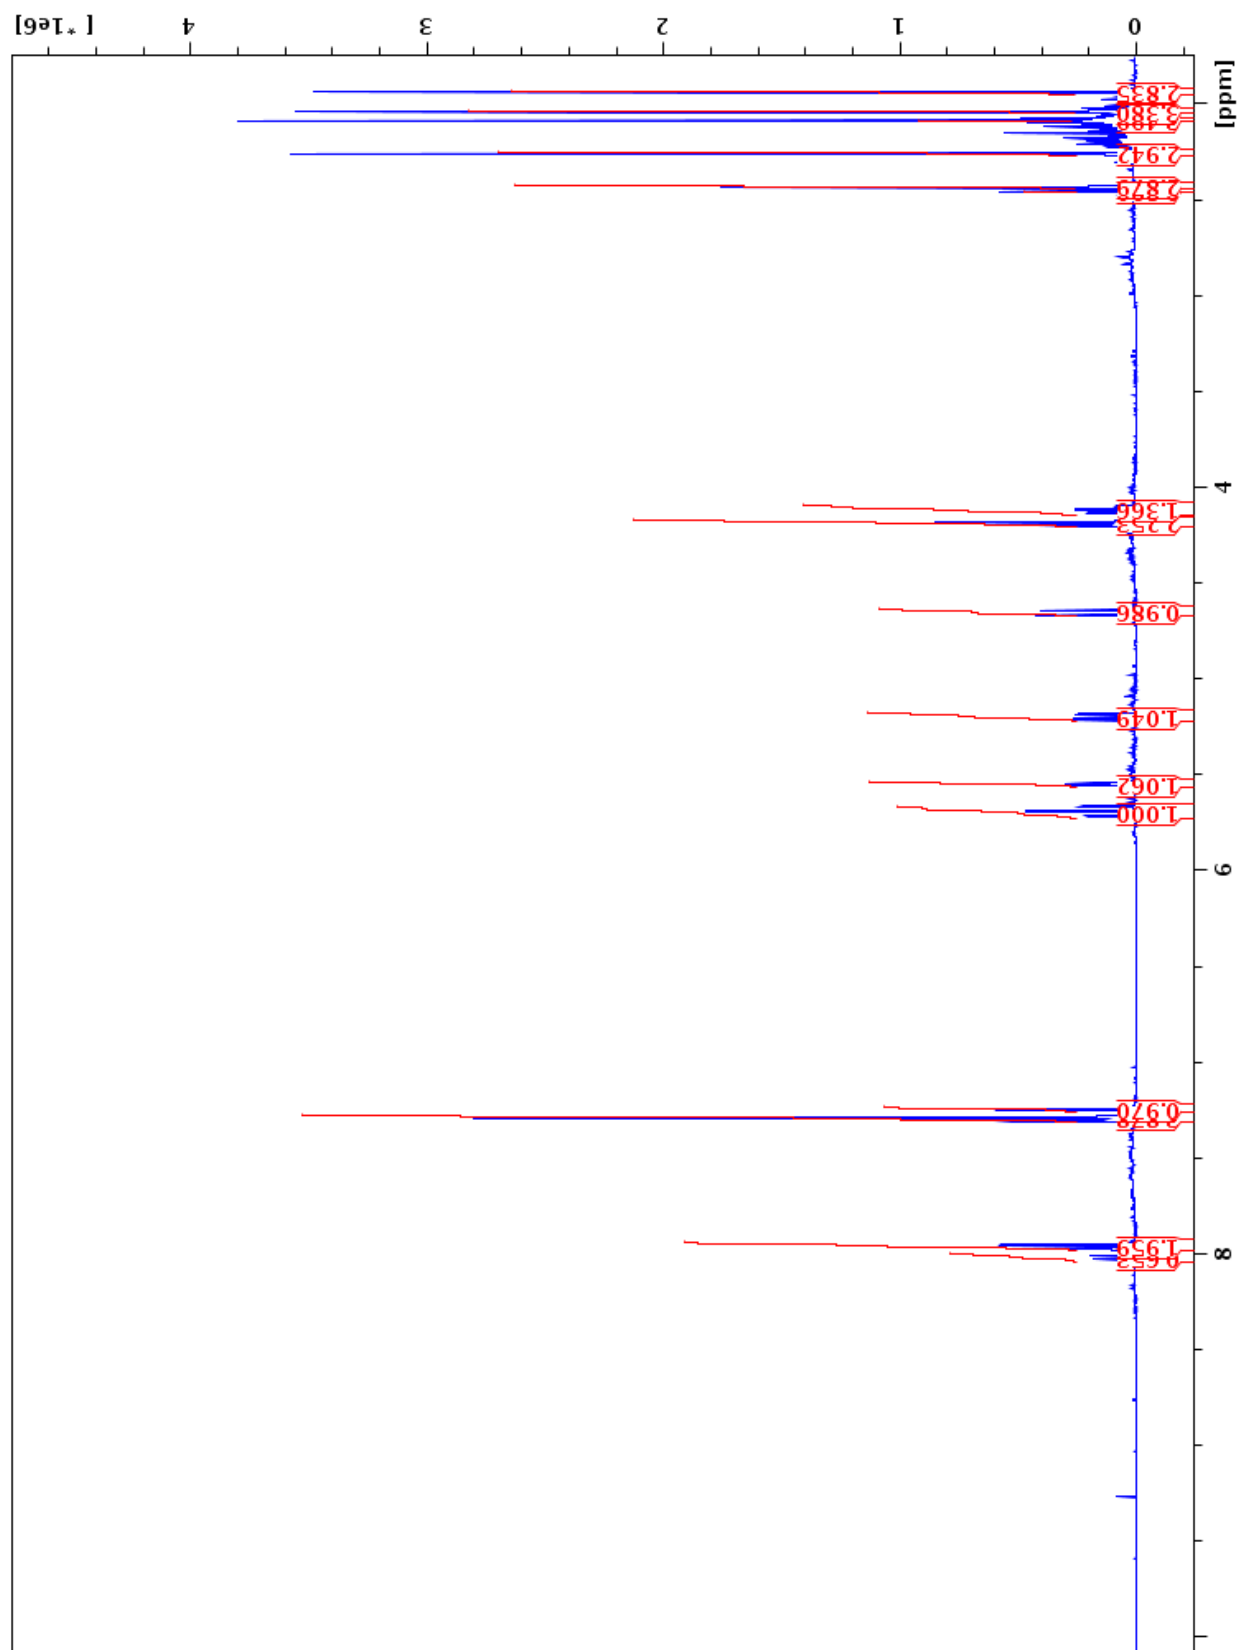

**10f:** 2-(4-methylphenyl)-5-(2,3,4,6-tetra-*O*-acetyl-1-deoxy- $\beta$ -D-galactopyranosyl)oxazole

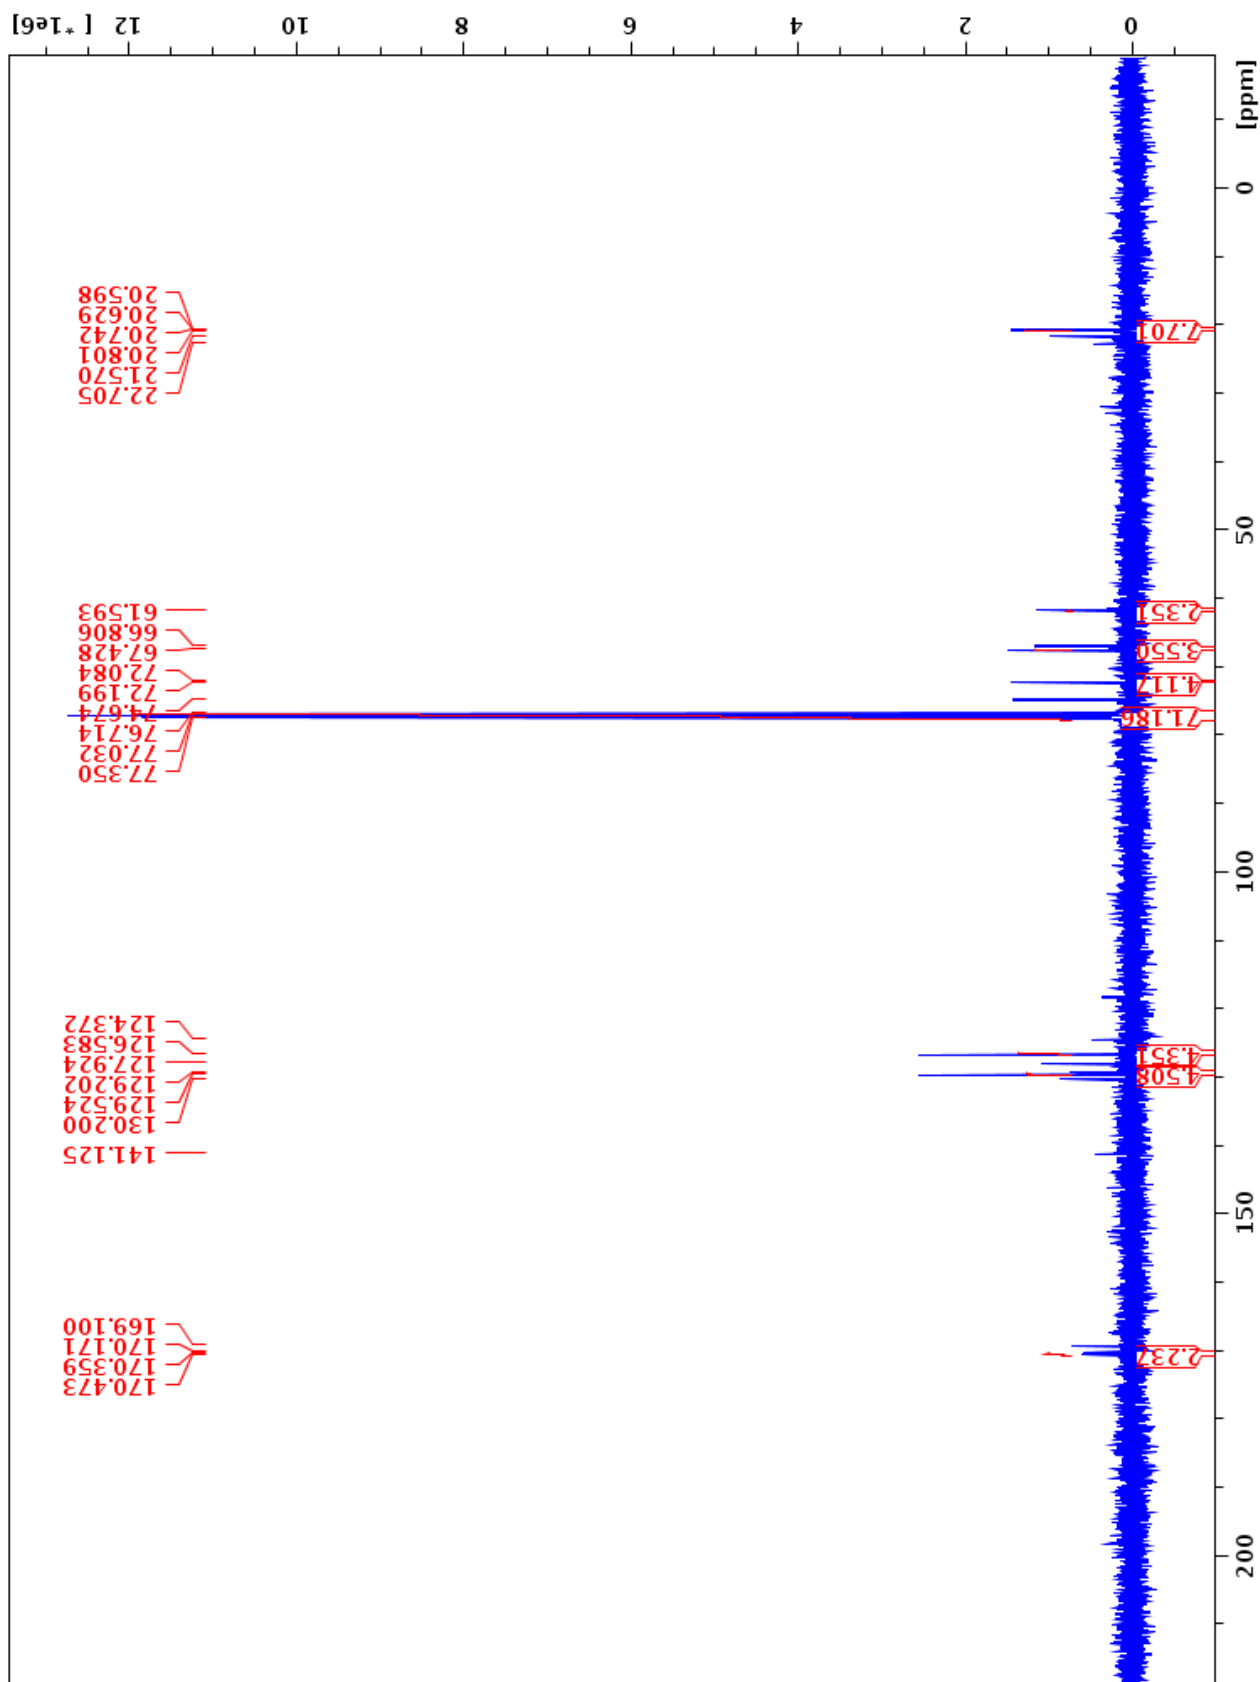



**10g:** 2-(3-methylphenyl)-5-(2,3,4,6-tetra-*O*-acetyl-1-deoxy- $\beta$ -D-galactopyranosyl)oxazole

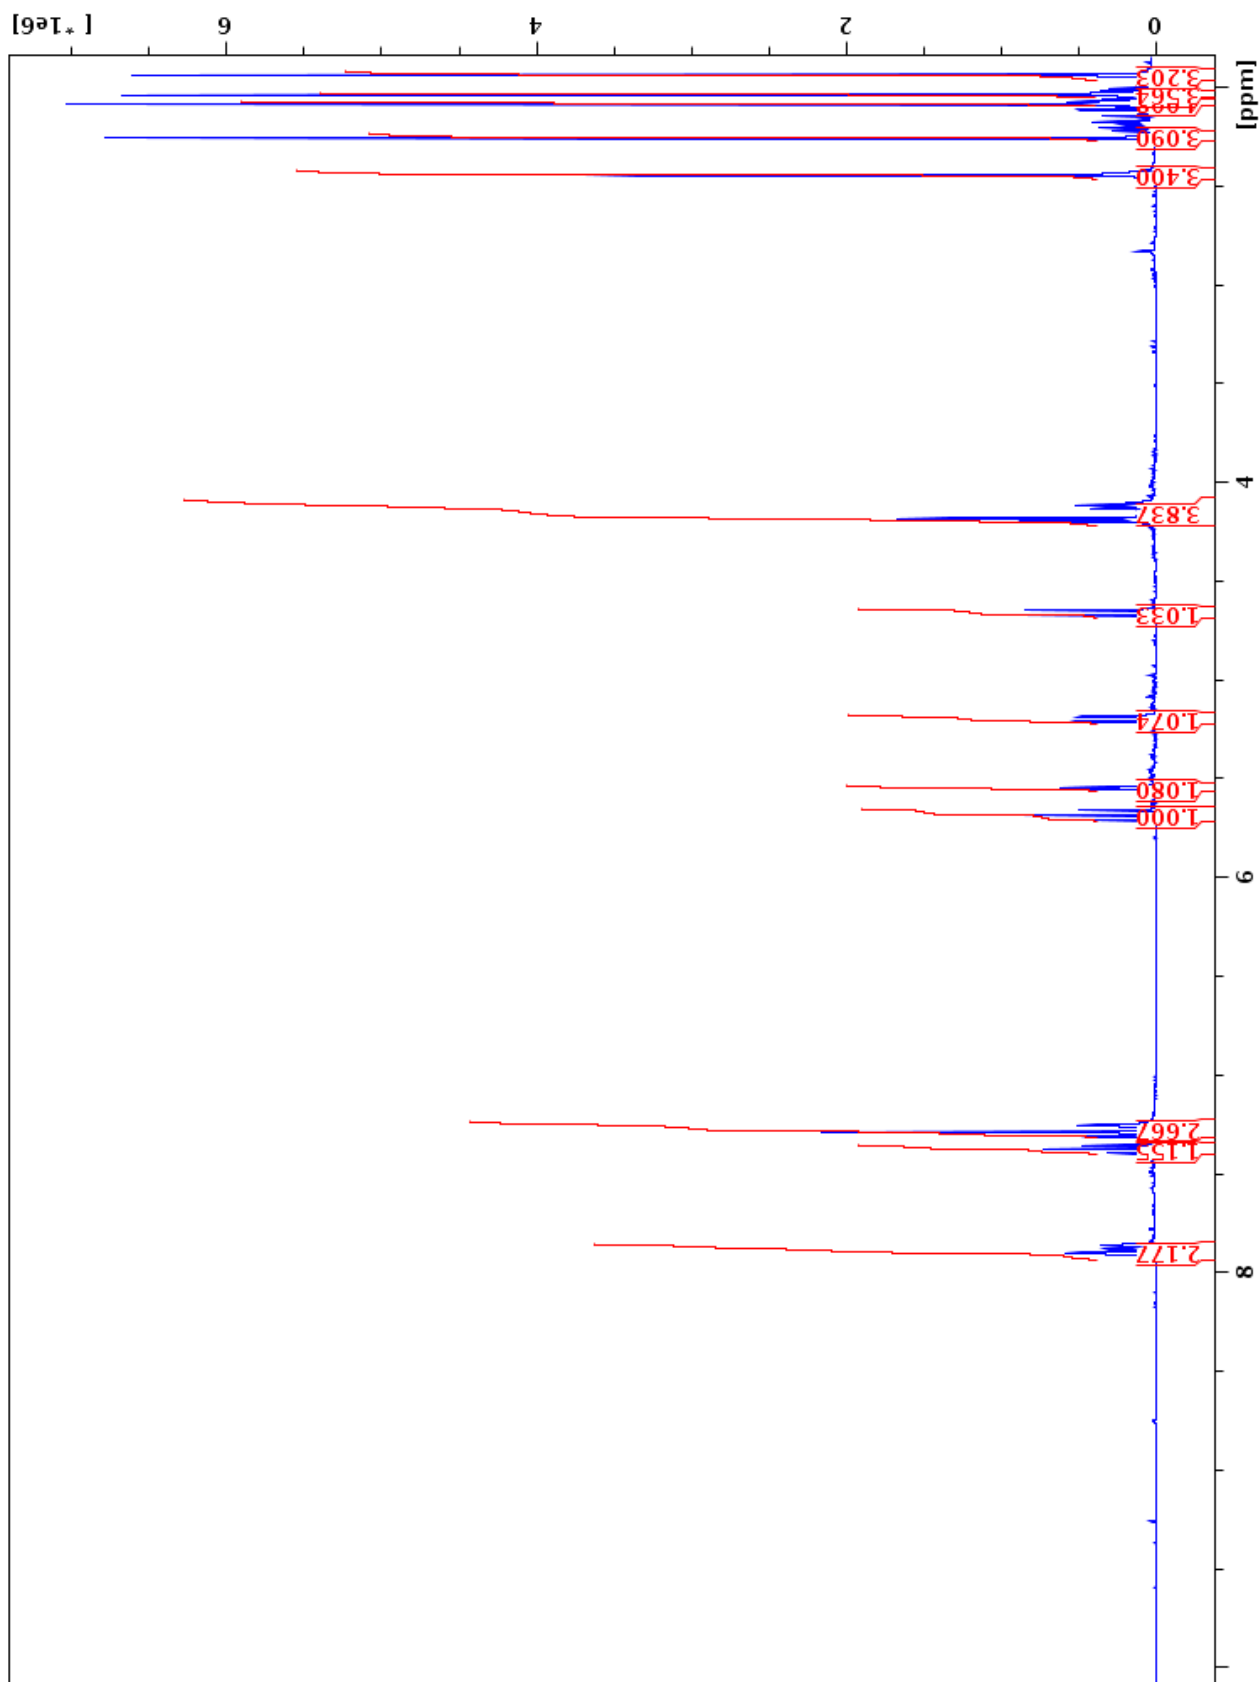

**10g:** 2-(3-methylphenyl)-5-(2,3,4,6-tetra-*O*-acetyl-1-deoxy-β-D-galactopyranosyl)oxazole

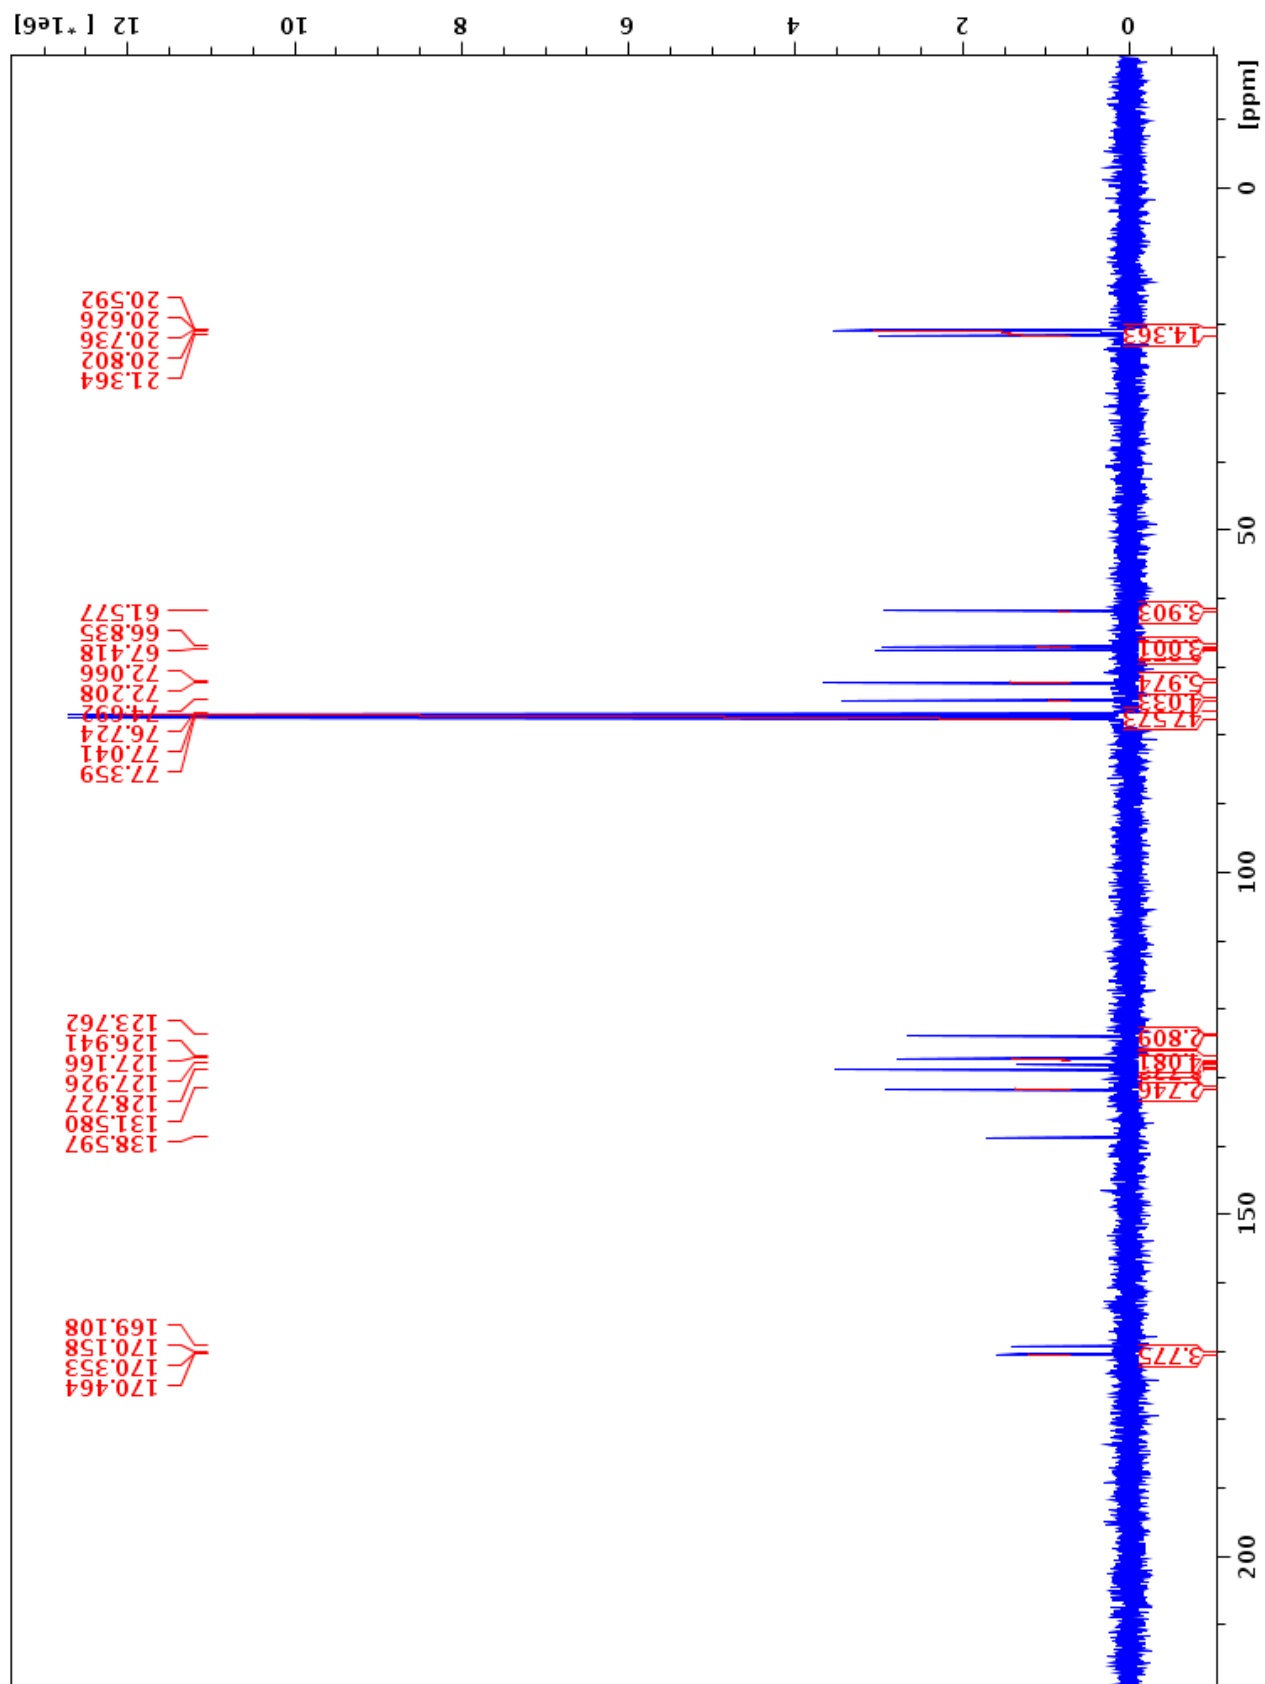

**10h:** 2-(4-fluorophenyl)-5-(2,3,4,6-tetra-*O*-acetyl-1-deoxy- $\beta$ -D-galactopyranosyl)oxazole

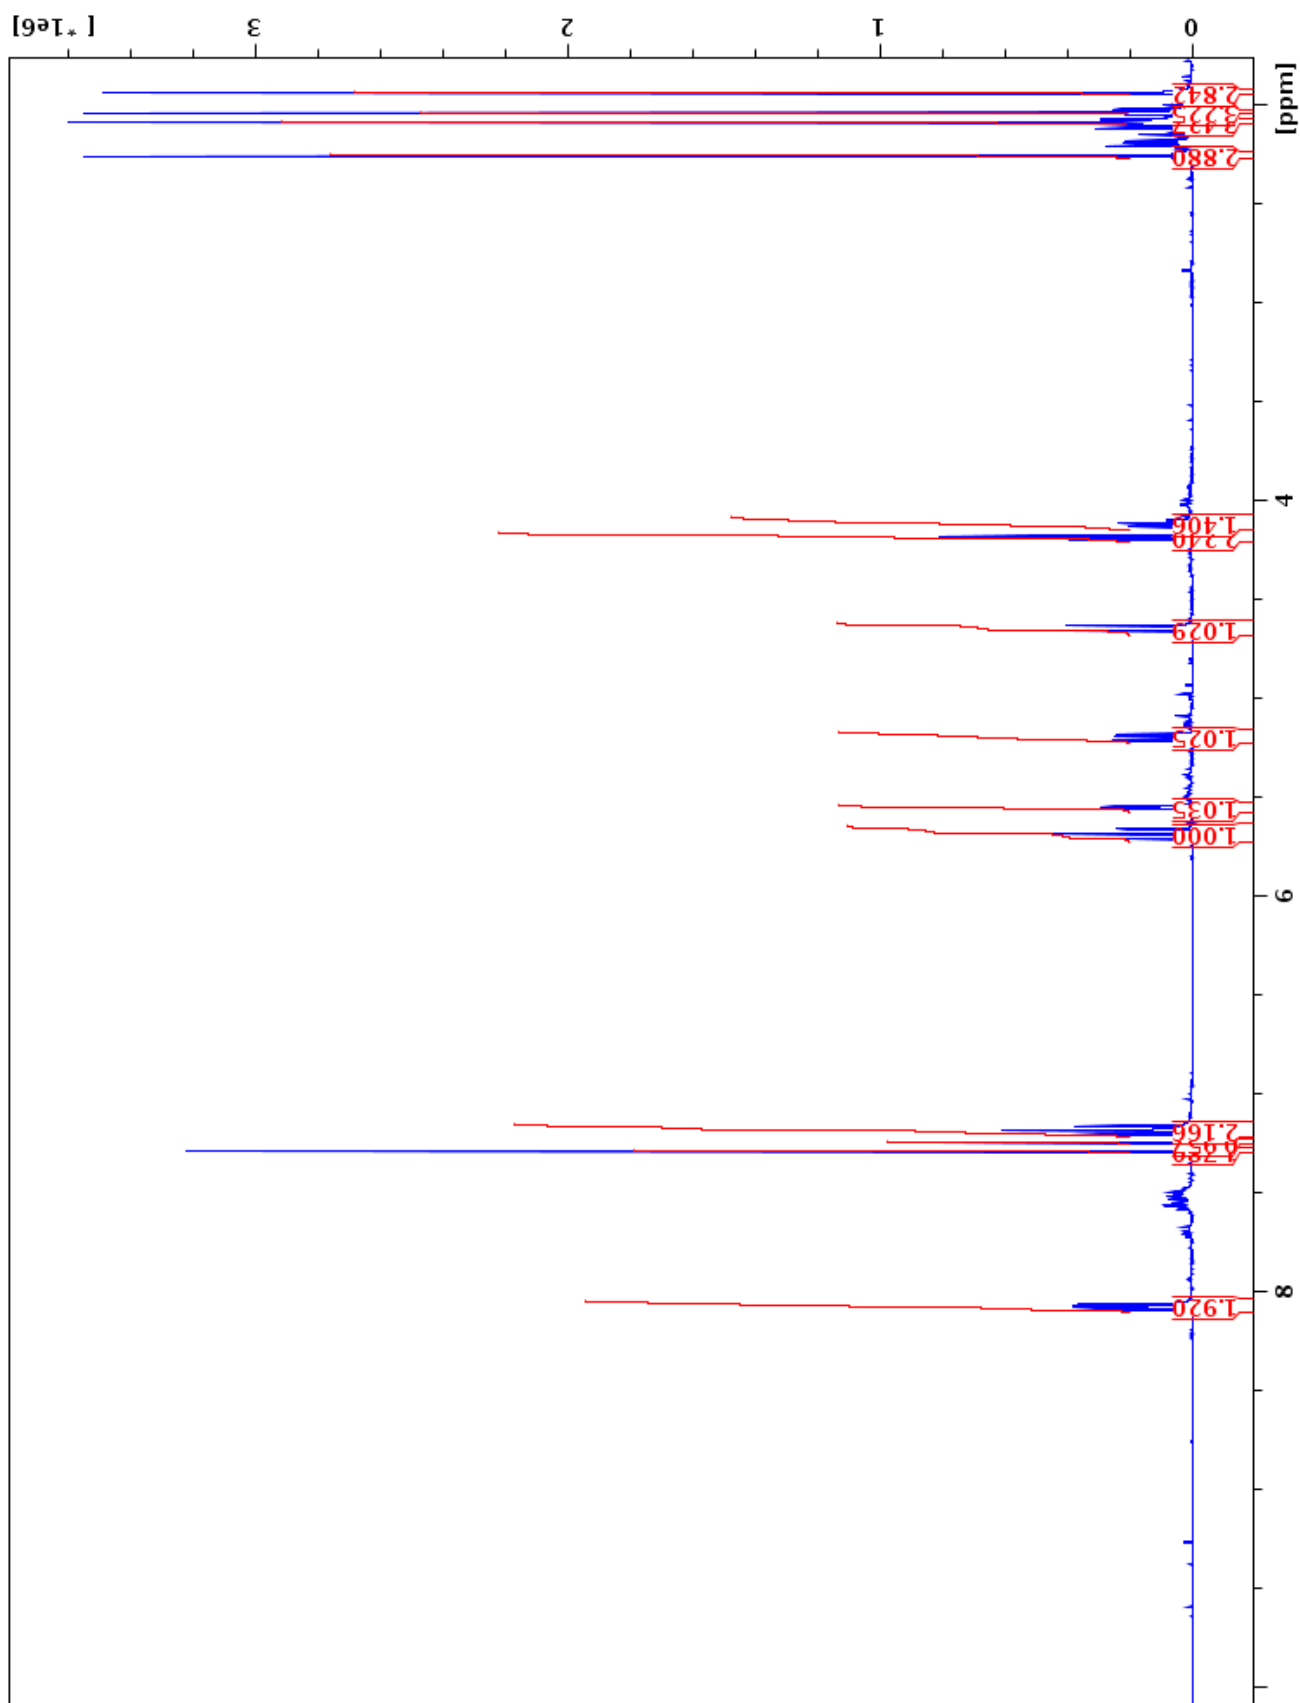

**10h:** 2-(4-fluorophenyl)-5-(2,3,4,6-tetra-*O*-acetyl-1-deoxy- $\beta$ -D-galactopyranosyl)oxazole

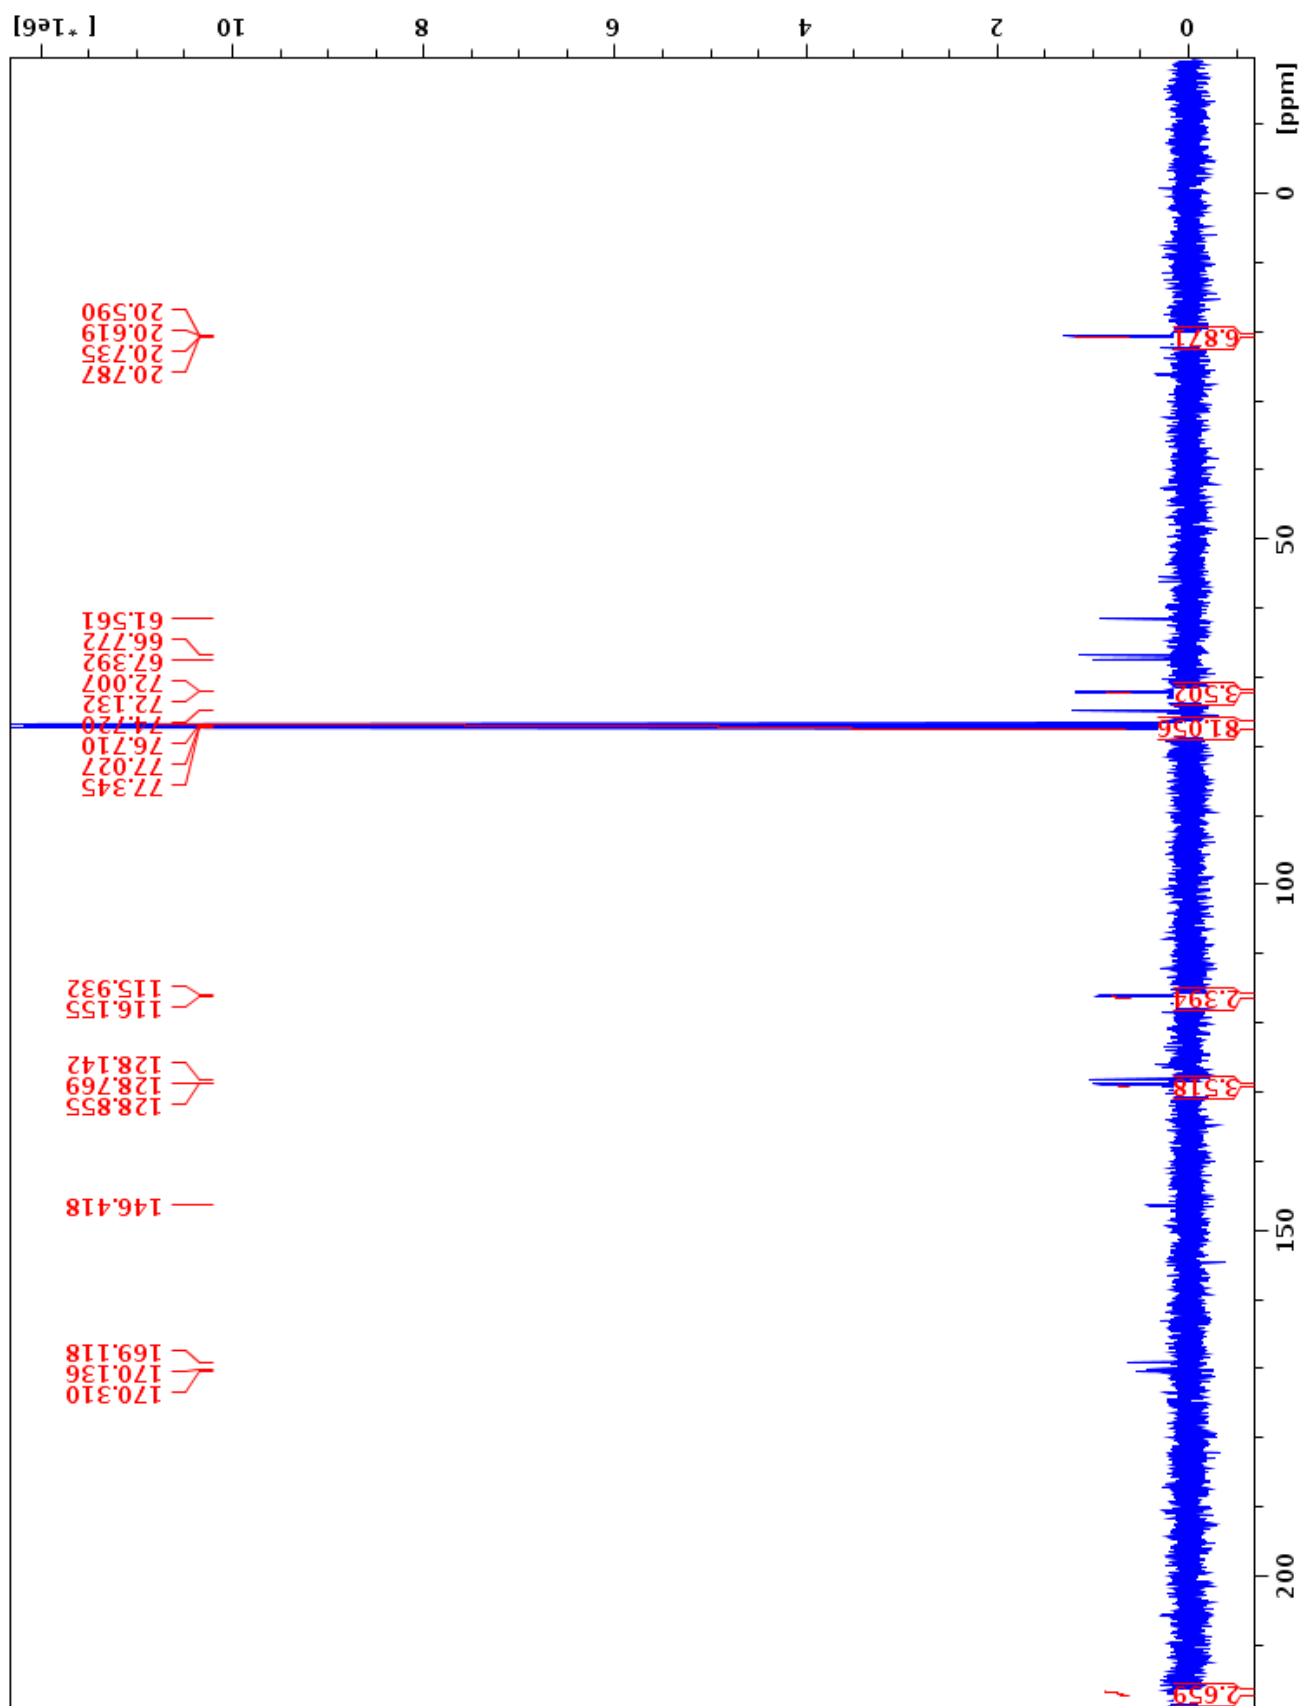

**10i:** 2-(3-fluorophenyl)-5-(2,3,4,6-tetra-*O*-acetyl-1-deoxy- $\beta$ -D galactopyranosyl)oxazole

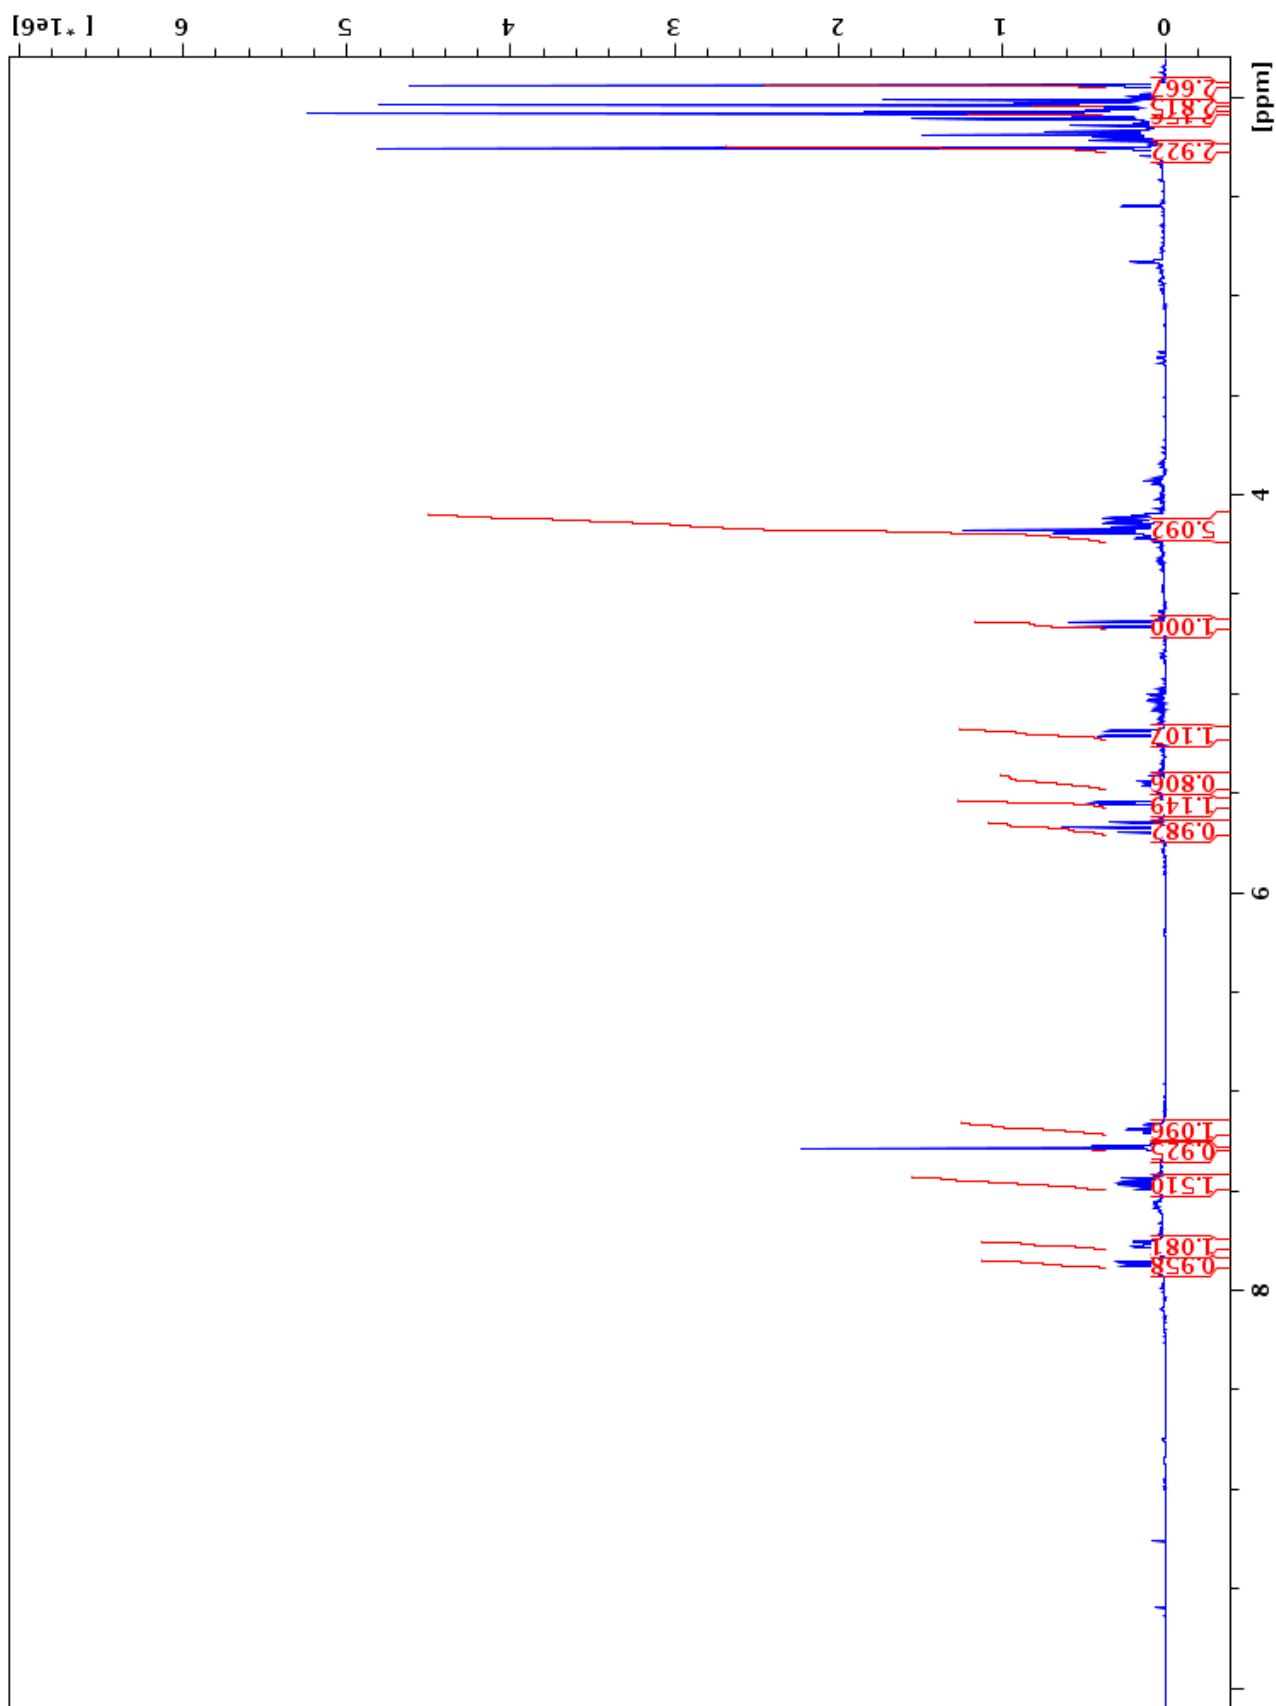

**10i:** 2-(3-fluorophenyl)-5-(2,3,4,6-tetra-*O*-acetyl-1-deoxy- $\beta$ -D-galactopyranosyl)oxazole

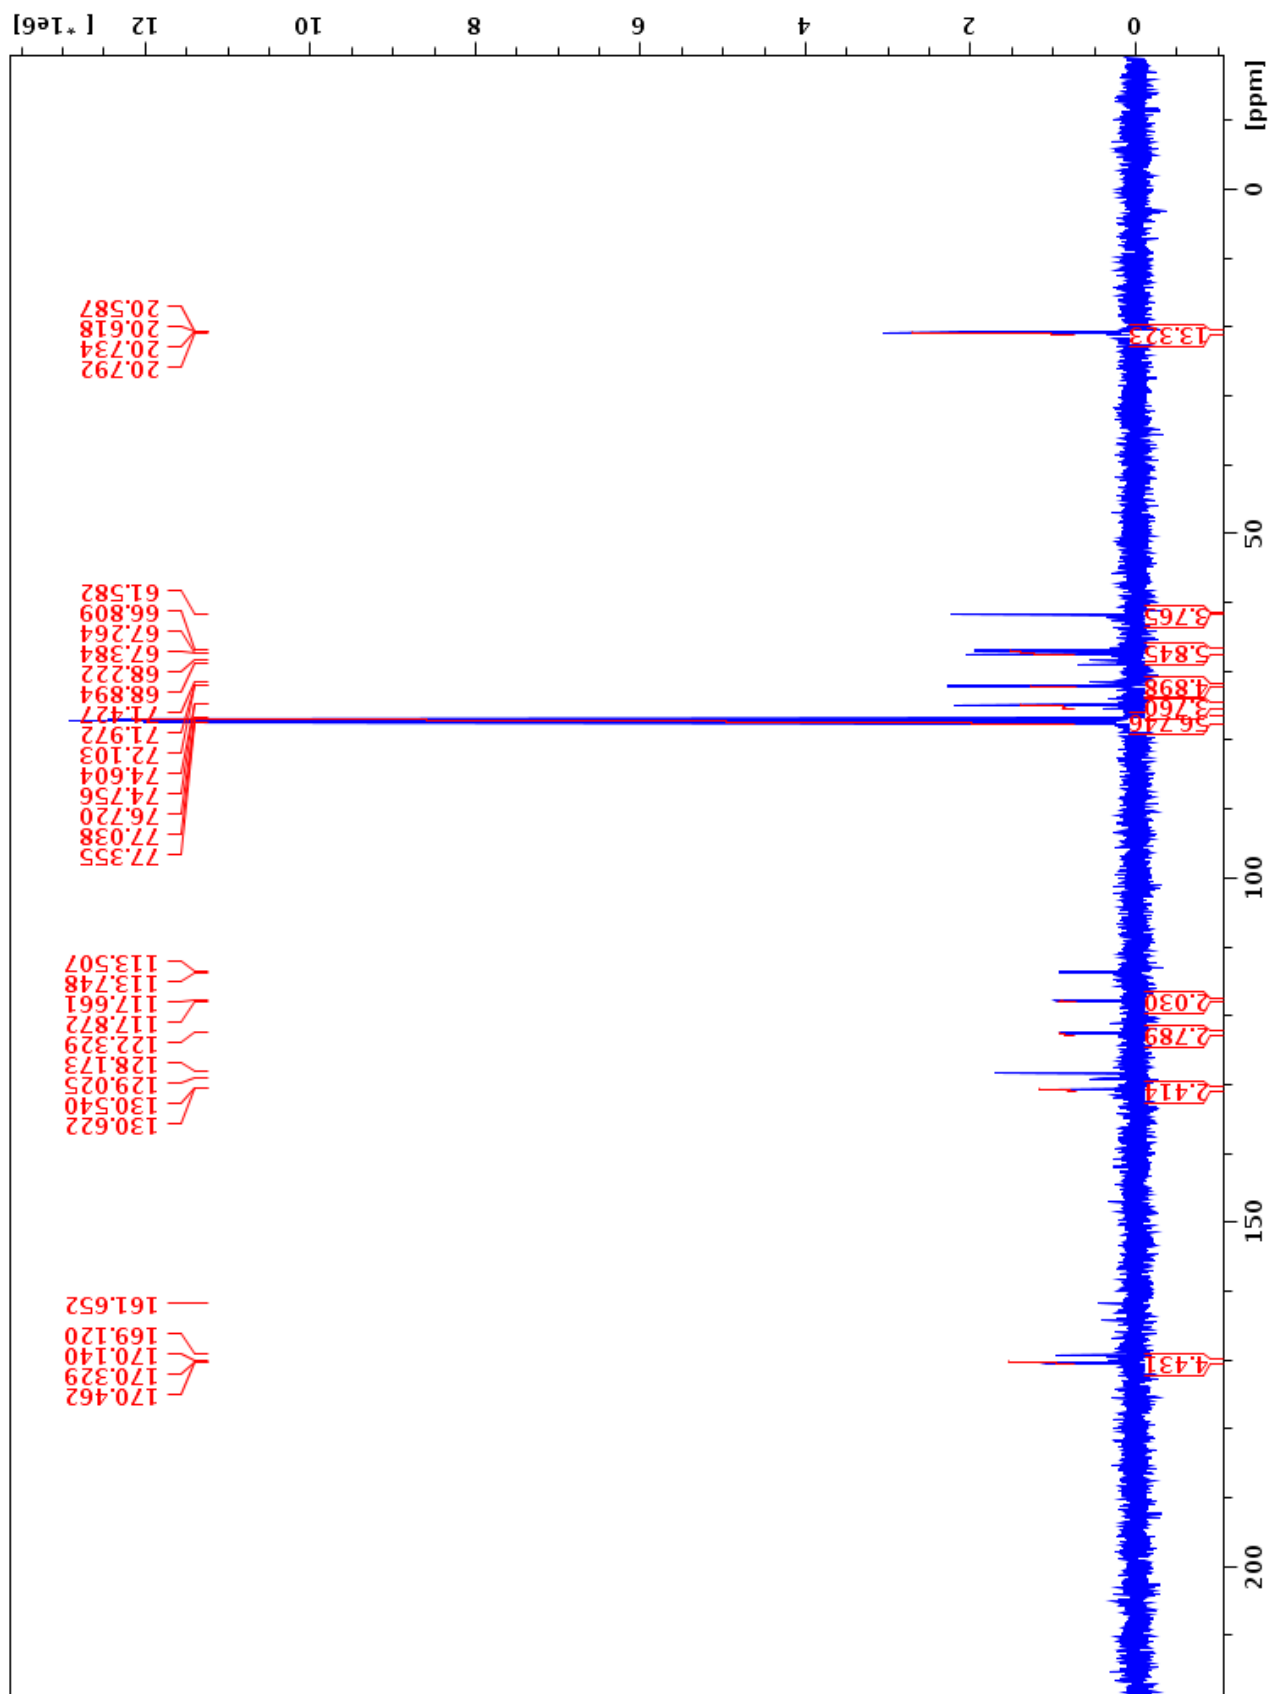

Supplement: Supplementary file 1 [file 14925227]
